# Supplementary material
Source: Research Square preprint supplement (doi:10.21203/rs.3.rs-9794069/v1)
Supplement: Supplementary file 1 [file 8f74d11b4935b04b308b7dd2.xlsx]

## Sheet: Metadata
	Title: Supplementary Material S2. Spatial Analysis Data and Hotspot Statistics.
	Description: This dataset supports the spatial modeling of biological invasions in Morocco. It contains the filtered subset of confirmed invasive species used for density mapping, the cleaned georeferenced occurrence records, and the aggregated regional invasion statistics.
	Sheet Name	Column Name	Description
	1_Confirmed_Search_List: The complete checklist of 342 confirmed invasive species (123 plants, 219 animals) used as the input query for the spatial analysis. This list was reconstructed by combining the filtered alien flora dataset (excluding cultivated taxa) with the verified alien fauna inventory.	Scientific_Name	The accepted scientific name of the species used to query the GBIF database.
		Kingdom	The biological kingdom (Plantae or Animalia).
		Family	The taxonomic family of the species.
		Life_Form	For Plants: The dominant growth form (e.g., Tree, Shrub, Herb). For Animals: N/A or default class.
		Trophic_Guild	For Animals: The primary feeding strategy (e.g., Herbivore, Predator). For Plants: Autotroph.
		Group	A simplified grouping variable indicating whether the species was processed as part of the "Plant" dataset (cultivated-filtered) or "Animal" dataset.
	2_Mapped_Species_List: The list of 177 confirmed invasive species for which valid georeferenced records were recovered and used in the density analysis.	Scientific_Name	The accepted scientific name of the species included in the spatial analysis.
		Invasion_Status	Confirmed status (e.g., "Confirmed Invasive"). Used to filter the master list.
		Family	Taxonomic family.
	3_Raw_GBIF_Download): The raw, unprocessed occurrence data retrieved from the Global Biodiversity Information Facility (GBIF). This dataset represents the initial download before the application of spatial cleaning (removing ocean/error points) or taxonomic filtering (removing agricultural crops).	Scientific_Name	The scientific name provided by the GBIF record. Note: This may include synonyms or unaccepted names prior to standardization.
		decimalLatitude	The raw latitude coordinate (WGS84) provided by the data publisher.
		decimalLongitude	The raw longitude coordinate (WGS84) provided by the data publisher.
		year	The year the observation or specimen was recorded.
		countryCode	The 2-letter ISO country code (e.g., "MA") provided in the raw record. Used to initially filter for Morocco.
		basisOfRecord	The specific nature of the record (e.g., HumanObservation, PreservedSpecimen, LivingSpecimen).
	4_Verified_Occurrences: The final dataset of 3,963 occurrence records after taxonomic filtering (excluding crops) and spatial cleaning.	Species	The scientific name associated with the occurrence record.
		Decimal_Latitude	The geographic latitude (WGS84) of the occurrence.
		Decimal_Longitude	The geographic longitude (WGS84) of the occurrence.
		Region_Name	The specific administrative region of Morocco where the point is located (verified by spatial intersection).
	5_Regional_Statistics: Density of IAS in the 12 Administrative Regions.	Region	The official name of the 12 Administrative Regions of Morocco (2015).
		Total_Occurence	The absolute number of verified occurrence records in that region.
		Density_Score	The invasion density for the region, calculated as the number of occurrences per square kilometer (occurrences/km²) to correct for regional surface area.

## Sheet: 1_Confirmed_Search_List
Scientific_Name	Kingdom	Family	Life_Form	Trophic_Guild	Group
Abutilon grandifolium	Plantae	Malvaceae	Herb		Plant
Abutilon theophrasti	Plantae	Malvaceae	Herb		Plant
Acacia cyclops	Plantae	Fabaceae	Tree		Plant
Acacia farnesiana	Plantae	Fabaceae	Tree		Plant
Acacia karroo	Plantae	Fabaceae	Tree		Plant
Acacia melanoxylon	Plantae	Fabaceae	Tree		Plant
Acacia saligna	Plantae	Fabaceae	Tree		Plant
Achatina fulica (Bowdich, 1822)					Animal
Acleris undulana (Walsingham, 1900)					Animal
Aedes aegypti (Linnaeus, 1762)					Animal
Aedes albopictus (Skuse, 1895)					Animal
Agave americana	Plantae	Asparagaceae	Herb		Plant
Agave sisalana	Plantae	Asparagaceae	Herb		Plant
Ageratina adenophora	Plantae	Asteraceae	Herb		Plant
Ailanthus altissima	Plantae	Simaroubaceae	Tree		Plant
Alburnus alburnus (Linnaeus, 1758)					Animal
Aloe vera	Plantae	Asphodelaceae	Herb		Plant
Aluterus monoceros (Linnaeus, 1758)					Animal
Amaranthus albus	Plantae	Amaranthaceae	Herb		Plant
Amaranthus blitoides	Plantae	Amaranthaceae	Herb		Plant
Amaranthus blitum	Plantae	Amaranthaceae	Herb		Plant
Amaranthus deflexus	Plantae	Amaranthaceae	Herb		Plant
Amaranthus hybridus	Plantae	Amaranthaceae	Herb		Plant
Amaranthus hypochondriacus	Plantae	Amaranthaceae	Herb		Plant
Amaranthus muricatus	Plantae	Amaranthaceae	Herb		Plant
Amaranthus powellii	Plantae	Amaranthaceae	Herb		Plant
Amaranthus retroflexus	Plantae	Amaranthaceae	Herb		Plant
Amaranthus standleyanus	Plantae	Amaranthaceae	Herb		Plant
Amaranthus viridis	Plantae	Amaranthaceae	Herb		Plant
Ambrosia maritima	Plantae	Asteraceae	Herb		Plant
Ammannia latifolia	Plantae	Lythraceae	Herb		Plant
Anguillicola crassus Kuwahara, Niimi & Itagaki, 1974					Animal
Apate monachus	Animalia	Bostrichidae		Herbivore	Animal
Aphytis lingnanensis Compere, 1955					Animal
Arctotheca calendula	Plantae	Asteraceae	Herb		Plant
Argiope trifasciata (Forsskål, 1775)					Animal
Aristichthys nobilis (Richardson, 1845) = Hypophthalmichthys nobilis (Richardson, 1845)					Animal
Artemia franciscana (Kellogg, 1906)					Animal
Artemia monica Verrill, 1869					Animal
Artemisia verlotiorum	Plantae	Asteraceae	Herb		Plant
Arundo donax	Plantae	Poaceae	Herb		Plant
Asclepias curassavica	Plantae	Apocynaceae	Herb		Plant
Asparagus asparagoides	Plantae	Asparagaceae	Herb		Plant
Astacus astacus (Linnaeus, 1758)					Animal
Asteriscus sericeus	Plantae	Asteraceae	Herb		Plant
Atherina boyeri Risso, 1810					Animal
Atriplex canescens	Plantae	Amaranthaceae	Herb		Plant
Atriplex nummularia	Plantae	Amaranthaceae	Herb		Plant
Atriplex semibaccata	Plantae	Amaranthaceae	Herb		Plant
Atriplex suberecta	Plantae	Amaranthaceae	Herb		Plant
Aurelia aurita (Linnaeus, 1758)					Animal
Azolla filiculoides	Plantae	Salviniaceae	Herb		Plant
Bactrocera cucurbitae (Coquillett, 1899)					Animal
Bactrocera dorsalis (Hendel, 1912)					Animal
Bactrocera zonata (Saunders, 1841)					Animal
Barbus barbus (Linnaeus, 1758)					Animal
Bassia indica	Plantae	Amaranthaceae	Herb		Plant
Bassia scoparia	Plantae	Amaranthaceae	Herb		Plant
Bemisia tabaci (Gennadius, 1889)					Animal
Bidens aurea	Plantae	Asteraceae	Herb		Plant
Bidens pilosa	Plantae	Asteraceae	Herb		Plant
Bipolaris hawaiiensis (Ellis) Uchida & Aragachi 1979					Animal
Botrylloides niger Herdman, 1886					Animal
Branchiomma luctuosum (Grube, 1870)					Animal
Bromus catharticus	Plantae	Poaceae	Herb		Plant
Bursatella leachii Blainville, 1817					Animal
Calendula officinalis	Plantae	Asteraceae	Herb		Plant
Callinectes sapidus Rathbun, 1896					Animal
Calopertha subretusa	Animalia	Bostrichidae		Herbivore	Animal
Caprella scaura Templeton, 1836					Animal
Carassius auratus (Linnaeus, 1758)					Animal
Carcharhinus altimus (Springer, 1950)					Animal
Cardiocondyla emeryi Forel, 1881					Animal
Cardiocondyla obscurior Wheeler, 1929					Animal
Carpobrotus acinaciformis	Plantae	Aizoaceae	Herb		Plant
Cassida nebulosa	Animalia	Chrysomelidae		Herbivore	Animal
Catocala nymphagoga Esper, 1787					Animal
Cenchrus longispinus	Plantae	Poaceae	Herb		Plant
Centaurea benedicta	Plantae	Asteraceae	Herb		Plant
Ceratitis capitata (Wiedemann, 1824)					Animal
Cervus nippon Temminck, 1838					Animal
Chenopodium bonus-henricus	Plantae	Amaranthaceae	Herb		Plant
Chenopodium giganteum	Plantae	Amaranthaceae	Herb		Plant
Cherax quadricarinatus (von Martens, 1868)					Animal
Chloris gayana	Plantae	Poaceae	Herb		Plant
Cinara (Cupressobium) cupressi (Buckton, 1881)					Animal
Clytia linearis (Thorneley, 1900)					Animal
Colocasia esculenta	Plantae	Araceae	Herb		Plant
Colpomenia peregrina Sauvageau, 1927					Animal
Corbicula fluminea (O. F. Müller, 1774)					Animal
Corchorus olitorius	Plantae	Malvaceae	Herb		Plant
Coriandrum sativum	Plantae	Apiaceae	Herb		Plant
Cortaderia selloana	Plantae	Poaceae	Herb		Plant
Corvus splendens Vieillot, 1817					Animal
Cotula coronopifolia	Plantae	Asteraceae	Herb		Plant
Crepidula fornicata (Linnaeus, 1758)					Animal
Cryphalus piceae	Animalia	Curculionidae		Herbivore	Animal
Cryptotermes brevis (Walker, 1853)					Animal
Ctenopharyngodon idella (Valenciennes, 1844)					Animal
Cutleria multifida (Turner) Greville 1830					Animal
Cyanus segetum	Plantae	Asteraceae	Herb		Plant
Cydia pomonella (Linnaeus, 1758)					Animal
Cyperus difformis	Plantae	Cyperaceae	Herb		Plant
Cyprinus carpio Linnaeus, 1758					Animal
Dactylopius opuntiae (Cockerell, 1896)					Animal
Dacus frontalis	Animalia	Tephritidae		Herbivore	Animal
Deudorix livia (Klug, 1834)					Animal
Didymella fabae G.J. Jellis & Punith (1991)					Animal
Dinoderus minutus	Animalia	Bostrichidae		Herbivore	Animal
Disphyma crassifolium	Plantae	Aizoaceae	Herb		Plant
Drosanthemum floribundum	Plantae	Aizoaceae	Herb		Plant
Dysphania multifida	Plantae	Amaranthaceae	Herb		Plant
Eclipta prostrata	Plantae	Asteraceae	Herb		Plant
Ehrharta erecta	Plantae	Poaceae	Herb		Plant
Eleusine indica	Plantae	Poaceae	Herb		Plant
Elodea canadensis					Plant
Enneadesmus forficula	Animalia	Bostrichidae		Herbivore	Animal
Enneadesmus trispinosus	Animalia	Bostrichidae		Herbivore	Animal
Epinotia algeriensis Chambon, 1990					Animal
Epinotia cedricida Diakonoff, 1969					Animal
Eragrostis curvula	Plantae	Poaceae	Herb		Plant
Erigeron bonariensis	Plantae	Asteraceae	Herb		Plant
Erigeron canadensis	Plantae	Asteraceae	Herb		Plant
Erigeron karvinskianus	Plantae	Asteraceae	Herb		Plant
Erigeron sumatrensis	Plantae	Asteraceae	Herb		Plant
Erwinia amylovora	Bacteria	Enterobacteriaceae		Unknown	Animal
Esox lucius Linnaeus, 1758					Animal
Esox masquinongy Mitchill, 1824					Animal
Etrumeus golanii DiBattista, Randall & Bowen, 2012					Animal
Eudendrium carneum Clarke, 1882					Animal
Eudendrium merulum Watson, 1985					Animal
Eupogonius tomentosus	Animalia	Cerambycidae		Herbivore	Animal
Eutetranychus orientalis (Klein, 1936)					Animal
Favorinus ghanensis Edmunds, 1968					Animal
Faxonius limosus (Rafinesque, 1817)					Animal
Ficus carica	Plantae	Moraceae	Herb		Plant
Fistularia commersonii Rüppell, 1838					Animal
Frankliniella occidentalis (Pergande, 1895)					Animal
Fundulus heteroclitus (Linnaeus, 1766)					Animal
Galinsoga quadriradiata	Plantae	Asteraceae	Herb		Plant
Gambusia affinis (Baird & Girard, 1853)					Animal
Gambusia holbrooki Girard, 1859					Animal
Glycaspis brimblecombei Moore, 1964					Animal
Gobio gobio (Linnaeus, 1758)					Animal
Godiva quadricolor (Barnard, 1927)					Animal
Gomphocarpus fruticosus	Plantae	Apocynaceae	Herb		Plant
Greenidea (Greenidea) ficicola Takahashi, 1921					Animal
Hedera helix	Plantae	Araliaceae	Herb		Plant
Helianthus annuus	Plantae	Asteraceae	Herb		Plant
Helicoverpa armigera (Hübner, 1808)					Animal
Heliotropium curassavicum	Plantae	Heliotropiaceae	Herb		Plant
Hemiramphus far (Forsskål, 1775)					Animal
Hermetia illucens (Linnaeus, 1758)					Animal
Hucho hucho (Linnaeus, 1758)					Animal
Hylurgus micklitzi	Animalia	Curculionidae		Herbivore	Animal
Hypoborus ficus	Animalia	Curculionidae		Herbivore	Animal
Hypophthalmichthys molitrix (Valenciennes, 1844)					Animal
Hypoponera punctatissima Forel, 1890					Animal
Icerya purchasi Maskell, 1878					Animal
Iris albicans	Plantae	Iridaceae	Herb		Plant
Iris lutescens	Plantae	Iridaceae	Herb		Plant
Laccaria fraterna (Sacc.) Pegler 1965					Animal
Lactarius blennius (Fr.) Fr. 1838					Animal
Lampranthus multiradiatus	Plantae	Aizoaceae	Herb		Plant
Lates niloticus (Linnaeus, 1758)					Animal
Laticorophium baconi (Shoemaker, 1934)					Animal
Lepomis cyanellus Rafinesque, 1819					Animal
Lepomis gibbosus (Linnaeus, 1758)					Animal
Lepomis macrochirus Rafinesque, 1819					Animal
Lepomis microlophus (Günther, 1859)					Animal
Leptocybe invasa Fisher & La Salle, 2004					Animal
Leptoglossus occidentalis Heidemann, 1910					Animal
Leucaspis pusilla Löw, 1883					Animal
Limothrips cerealium (Haliday, 1836)					Animal
Linepithema humile (Mayr, 1868)					Animal
Linum usitatissimum	Plantae	Linaceae	Herb		Plant
Lioponera longitarsus Mayr, 1879					Animal
Lupinus albus	Plantae	Fabaceae	Herb		Plant
Lupinus luteus	Plantae	Fabaceae	Herb		Plant
Lyctus africanus	Animalia	Bostrichidae		Herbivore	Animal
Lyrodus pedicellatus (Quatrefages, 1849)					Animal
Magallana angulata (Lamarck, 1819)					Animal
Magallana gigas (Thunberg, 1793)					Animal
Malvastrum coromandelianum	Plantae	Malvaceae	Herb		Plant
Medicago arborea	Plantae	Fabaceae	Herb		Plant
Medicago falcata	Plantae	Fabaceae	Herb		Plant
Medicago rotata	Plantae	Fabaceae	Herb		Plant
Megastigmus pinsapinis Hoffmeyer, 1931					Animal
Melanophila marmottani	Animalia	Buprestidae		Unknown	Animal
Melilotus albus	Plantae	Fabaceae	Herb		Plant
Melilotus officinalis	Plantae	Fabaceae	Herb		Plant
Merhippolyte ancistrota Crosnier & Forest, 1973					Animal
Mesembryanthemum cordifolium	Plantae	Aizoaceae	Herb		Plant
Microcosmus squamiger Michaelsen, 1927					Animal
Micropterus dolomieu Lacepède, 1802					Animal
Micropterus salmoides (Lacepède, 1802)					Animal
Mizuhopecten yessoensis (J. C. Jay, 1857)					Animal
Mnemiopsis leidyi A. Agassiz, 1865					Animal
Modiola caroliniana	Plantae	Malvaceae	Herb		Plant
Moluccella laevis	Plantae	Lamiaceae	Herb		Plant
Monomorium monomorium Bolton, 1987					Animal
Monomorium pharaonis (Linnaeus, 1758)					Animal
Mustela nivalis Linnaeus, 1766					Animal
Mya arenaria Linnaeus, 1758					Animal
Mylopharyngodon piceus (Richardson, 1846)					Animal
Nicotiana glauca	Plantae	Solanaceae	Shrub		Plant
Nothoscordum borbonicum	Plantae	Amaryllidaceae	Herb		Plant
Nylanderia jaegerskioeldi (Mayr, 1904)					Animal
Ommatissus lybicus de Bergevin, 1930					Animal
Oncorhynchus clarkii (Richardson, 1836)					Animal
Oncorhynchus mykiss (Walbaum, 1792)					Animal
Onobrychis viciifolia	Plantae	Fabaceae	Herb		Plant
Ooencyrtus kuvanae (Howard, 1910)					Animal
Ophelimus maskelli (Ashmead, 1900)					Animal
Opogona sacchari (Bojer, 1856)					Animal
Oreochromis niloticus (Linnaeus, 1758)					Animal
Orthotomicus longicollis	Animalia	Curculionidae		Herbivore	Animal
Oryctes agamemnon	Animalia	Scarabaeidae		Unknown	Animal
Oxalis pes-caprae	Plantae	Oxalidaceae	Herb		Plant
Oxyura jamaicensis (J. F. Gmelin, 1789)					Animal
Panicum antidotale	Plantae	Poaceae	Herb		Plant
Panicum capillare	Plantae	Poaceae	Herb		Plant
Panicum miliaceum	Plantae	Poaceae	Herb		Plant
Paracerceis sculpta (Holmes, 1904)					Animal
Paraleucilla magna Klautau, Monteiro & Borojevic, 2004					Animal
Paratrechina longicornis (Latreille, 1802)					Animal
Paspalum dilatatum	Plantae	Poaceae	Herb		Plant
Paspalum distichum	Plantae	Poaceae	Herb		Plant
Paspalum vaginatum	Plantae	Poaceae	Herb		Plant
Penaeus japonicus Spence Bate, 1888					Animal
Pennisetum clandestinum	Plantae	Poaceae	Herb		Plant
Pennisetum purpureum	Plantae	Poaceae	Herb		Plant
Pennisetum villosum	Plantae	Poaceae	Herb		Plant
Perca fluviatilis Linnaeus, 1758					Animal
Percnon gibbesi (H. Milne Edwards, 1853)					Animal
Pezothrips kellyanus (Bagnall, 1916)					Animal
Phasianus colchicus Linnaeus, 1758					Animal
Pheidole indica Mayr, 1879					Animal
Pheidole megacephala (Fabricius, 1793)					Animal
Phenacoccus madeirensis Green, 1923					Animal
Phlebotomus (Paraphlebotomus) kazeruni Theodor and Mesghali, 1964]					Animal
Phloeosinus cedri	Animalia	Curculionidae		Herbivore	Animal
Pholcus phalangioides (Fuesslin, 1775)					Animal
Phoracantha recurva	Animalia	Cerambycidae		Herbivore	Animal
Phoracantha semipunctata	Animalia	Cerambycidae		Herbivore	Animal
Phoxinus phoxinus (Linnaeus, 1758)					Animal
Phyllocnistis citrella Stainton, 1856					Animal
Phyllorhiza punctata von Lendenfeld, 1884					Animal
Physalia physalis (Linnaeus, 1758)					Animal
Physella acuta (Draparnaud, 1805)					Animal
Pisolithus albus (Cooke & Massee) Priest					Animal
Pisolithus microcarpus (Cooke & Massee) G. Cunn.					Animal
Plagiotrochus amenti Kieffer, 1901					Animal
Planococcus ficus (Signoret, 1875)					Animal
Poecilia reticulata	Animalia	Poeciliidae		Unknown	Animal
Polyandrocarpa zorritensis (Van Name, 1931)					Animal
Polycera hedgpethi Er. Marcus, 1964					Animal
Polycerella emertoni A. E. Verrill, 1880					Animal
Polyphagotarsonemus latus (Banks, 1904)					Animal
Pomoxis annularis	Animalia	Centrarchidae		Predator	Animal
Pomoxis nigromaculatus	Animalia	Centrarchidae		Predator	Animal
Procambarus clarkii (Girard, 1852)					Animal
Psammodromus hispanicus (Fitzinger, 1826)					Animal
Pseudorasbora parva	Animalia	Cyprinidae		Omnivore	Animal
Punica granatum	Plantae	Lythraceae	Herb		Plant
Rattus norvegicus	Animalia	Muridae		Unknown	Animal
Reddellomyces donkii (Malençon) Trappe, Castellano & Malajczuk					Animal
Reticulitermes grassei Holmgren, 1913					Animal
Rhynchophorus ferrugineus	Animalia	Dryophthoridae		Unknown	Animal
Ricinus communis	Plantae	Euphorbiaceae	Shrub		Plant
Robinia pseudoacacia	Plantae	Fabaceae	Tree		Plant
Rugulopteryx okamurae (E.Y.Dawson) I.K.Hwang, W.J.Lee & H.S.Kim, 2009					Animal
Rutilus rutilus (Linnaeus, 1758)					Animal
Saccharina japonica (Areschoug) C.E.Lane, C.Mayes, Druehl & G.W.Saunders, 2006					Animal
Salpichroa origanifolia	Plantae	Solanaceae	Herb		Plant
Salvelinus alpinus (Linnaeus, 1758)					Animal
Salvelinus fontinalis (Mitchill, 1814)					Animal
Salvelinus namaycush (Walbaum, 1792)					Animal
Sambucus nigra	Plantae	Viburnaceae	Herb		Plant
Sander lucioperca	Animalia	Percidae		Unknown	Animal
Sargassum muticum	Chromista	Sargassaceae		Unknown	Animal
Scardinius erythrophthalmus (Linnaeus, 1758)					Animal
Scleroderma albidum Pat. & Trab., 1899					Animal
Scleroderma bovista Fries (1829)					Animal
Scobicia chevrieri	Animalia	Bostrichidae		Herbivore	Animal
Scolytus amygdali	Animalia	Curculionidae		Herbivore	Animal
Scythropus warioni	Animalia	Curculionidae		Herbivore	Animal
Semanotus algiricus	Animalia	Cerambycidae		Herbivore	Animal
Setchelliogaster tenuipes (Setch.) Pouzar (1958)					Animal
Sinoxylon muricatum	Animalia	Bostrichidae		Herbivore	Animal
Sinoxylon perforans	Animalia	Bostrichidae		Herbivore	Animal
Sinoxylon succisum	Animalia	Bostrichidae		Herbivore	Animal
Sirex noctilio Fabricius, 1793					Animal
Solanum elaeagnifolium	Plantae	Solanaceae	Shrub		Plant
Soliva stolonifera	Plantae	Asteraceae	Herb		Plant
Sorghum virgatum	Plantae	Poaceae	Herb		Plant
Spartina densiflora	Plantae	Poaceae	Herb		Plant
Sphaeroma walkeri Stebbing, 1905					Animal
Spodoptera littoralis (Boisduval, 1833)					Animal
Sporobolus indicus	Plantae	Poaceae	Herb		Plant
Stenotaphrum secundatum	Plantae	Poaceae	Herb		Plant
Stenothrips graminum Uzel, 1895					Animal
Sternbergia lutea	Plantae	Amaryllidaceae	Herb		Plant
Strumigenys membranifera Emery, 1869					Animal
Strumigenys rogeri Emery, 1890					Animal
Styela plicata (Lesueur, 1823)					Animal
Suillus luteus (L.) Roussel (1796)					Animal
Syllis (Typosyllis) pectinans Haswell, 1920					Animal
Symphyotrichum squamatum	Plantae	Asteraceae	Herb		Plant
Tagetes minuta	Plantae	Asteraceae	Herb		Plant
Taphrorychus villifrons	Animalia	Curculionidae		Herbivore	Animal
Teredo bartschi Clapp, 1923					Animal
Teretrius accaciae	Animalia	Histeridae		Unknown	Animal
Teretrius corticalis	Animalia	Histeridae		Unknown	Animal
Teretrius kraatzi	Animalia	Histeridae		Unknown	Animal
Teretrius pulex	Animalia	Histeridae		Unknown	Animal
Tetramorium bicarinatum (Nylander, 1846)					Animal
Tetramorium caldarium (Roger, 1857)					Animal
Tetramorium lanuginosum Mayr, 1870					Animal
Tetranychus evansi Baker & Pritchard, 1960					Animal
Tetranychus turkestani (Ugarov & Nikolskii, 1937)					Animal
Tetranychus urticae Koch, 1836					Animal
Thymallus thymallus (Linnaeus, 1758)					Animal
Tinca tinca (Linnaeus, 1758)					Animal
Tricellaria inopinata d'Hondt & Occhipinti Ambrogi, 1985					Animal
Trichocorixa verticalis (Fieber, 1851)					Animal
Trichomyrmex destructor (Jerdon, 1851)					Animal
Tridentata marginata (Kirchenpauer, 1864)					Animal
Trifolium alexandrinum	Plantae	Fabaceae	Herb		Plant
Trifolium incarnatum	Plantae	Fabaceae	Herb		Plant
Trigonella foenum-graecum	Plantae	Fabaceae	Herb		Plant
Trogoderma granarium	Animalia	Dermestidae		Detritivore	Animal
Tuta absoluta (Meyrick, 1917)					Animal
Verbesina encelioides	Plantae	Asteraceae	Herb		Plant
Vespa velutina Lepeletier, 1836					Animal
Vicia pannonica	Plantae	Fabaceae	Herb		Plant
Xanthium orientale	Plantae	Asteraceae	Herb		Plant
Xanthium spinosum	Plantae	Asteraceae	Herb		Plant
Xyleborinus saxesenii	Animalia	Curculionidae		Herbivore	Animal
Xylomedes coronata	Animalia	Bostrichidae		Herbivore	Animal
Zantedeschia aethiopica	Plantae	Araceae	Herb		Plant
Acipenser baerii Brandt, 186					Animal
Ameiurus melas (Rafinesque, 1820)					Animal
Ctenopharyngodon idella (Valenciennes, 1844)					Animal

## Sheet: 2_Mapped_Species_List
Scientific_Name	Kingdom	Phylum	Class	Family	Life_Form
Abutilon grandifolium	Plantae	Tracheophyta	Magnoliopsida	Malvaceae	Herb
Acacia cyclops	Plantae	Tracheophyta	Magnoliopsida	Fabaceae	Tree
Acacia farnesiana	Plantae	Tracheophyta	Magnoliopsida	Fabaceae	Tree
Acacia karroo	Plantae	Tracheophyta	Magnoliopsida	Fabaceae	Tree
Acacia melanoxylon	Plantae	Tracheophyta	Magnoliopsida	Fabaceae	Tree
Acacia saligna	Plantae	Tracheophyta	Magnoliopsida	Fabaceae	Tree
Aedes albopictus (Skuse, 1895)
Agave americana	Plantae	Tracheophyta	Liliopsida	Asparagaceae	Herb
Agave sisalana	Plantae	Tracheophyta	Liliopsida	Asparagaceae	Herb
Ailanthus altissima	Plantae	Tracheophyta	Magnoliopsida	Simaroubaceae	Tree
Aloe vera	Plantae	Tracheophyta	Liliopsida	Asphodelaceae	Herb
Amaranthus albus	Plantae	Tracheophyta	Magnoliopsida	Amaranthaceae	Herb
Amaranthus blitoides	Plantae	Tracheophyta	Magnoliopsida	Amaranthaceae	Herb
Amaranthus blitum	Plantae	Tracheophyta	Magnoliopsida	Amaranthaceae	Herb
Amaranthus deflexus	Plantae	Tracheophyta	Magnoliopsida	Amaranthaceae	Herb
Amaranthus hybridus	Plantae	Tracheophyta	Magnoliopsida	Amaranthaceae	Herb
Amaranthus hypochondriacus	Plantae	Tracheophyta	Magnoliopsida	Amaranthaceae	Herb
Amaranthus muricatus	Plantae	Tracheophyta	Magnoliopsida	Amaranthaceae	Herb
Amaranthus powellii	Plantae	Tracheophyta	Magnoliopsida	Amaranthaceae	Herb
Amaranthus retroflexus	Plantae	Tracheophyta	Magnoliopsida	Amaranthaceae	Herb
Amaranthus viridis	Plantae	Tracheophyta	Magnoliopsida	Amaranthaceae	Herb
Apate monachus	Animalia	Arthropoda	Insecta	Bostrichidae
Aphanius fasciatus (Valenciennes, 1821)
Arctotheca calendula	Plantae	Tracheophyta	Magnoliopsida	Asteraceae	Herb
Argiope trifasciata (Forsskål, 1775)
Arundo donax	Plantae	Tracheophyta	Liliopsida	Poaceae	Herb
Asclepias curassavica	Plantae	Tracheophyta	Magnoliopsida	Apocynaceae	Herb
Astacus astacus (Linnaeus, 1758)
Atherina boyeri Risso, 1810
Atriplex canescens	Plantae	Tracheophyta	Magnoliopsida	Amaranthaceae	Herb
Atriplex nummularia	Plantae	Tracheophyta	Magnoliopsida	Amaranthaceae	Herb
Atriplex semibaccata	Plantae	Tracheophyta	Magnoliopsida	Amaranthaceae	Herb
Atriplex suberecta	Plantae	Tracheophyta	Magnoliopsida	Amaranthaceae	Herb
Aurelia aurita (Linnaeus, 1758)
Azolla filiculoides	Plantae	Tracheophyta	Polypodiopsida	Salviniaceae	Herb
Bassia indica	Plantae	Tracheophyta	Magnoliopsida	Amaranthaceae	Herb
Bassia scoparia	Plantae	Tracheophyta	Magnoliopsida	Amaranthaceae	Herb
Bemisia tabaci (Gennadius, 1889)
Bidens aurea	Plantae	Tracheophyta	Magnoliopsida	Asteraceae	Herb
Bidens pilosa	Plantae	Tracheophyta	Magnoliopsida	Asteraceae	Herb
Botrylloides niger Herdman, 1886
Branchiomma luctuosum (Grube, 1870)
Bromus catharticus	Plantae	Tracheophyta	Liliopsida	Poaceae	Herb
Bursatella leachii Blainville, 1817
Calendula officinalis	Plantae	Tracheophyta	Magnoliopsida	Asteraceae	Herb
Callinectes sapidus Rathbun, 1896
Caprella scaura Templeton, 1836
Carassius auratus (Linnaeus, 1758)
Carpobrotus acinaciformis	Plantae	Tracheophyta	Magnoliopsida	Aizoaceae	Herb
Catocala nymphagoga Esper, 1787
Ceratitis capitata (Wiedemann, 1824)
Chenopodium bonus-henricus	Plantae	Tracheophyta	Magnoliopsida	Amaranthaceae	Herb
Chenopodium giganteum	Plantae	Tracheophyta	Magnoliopsida	Amaranthaceae	Herb
Chloris gayana	Plantae	Tracheophyta	Liliopsida	Poaceae	Herb
Colocasia esculenta	Plantae	Tracheophyta	Liliopsida	Araceae	Herb
Corbicula fluminea (O. F. Müller, 1774)
Coriandrum sativum	Plantae	Tracheophyta	Magnoliopsida	Apiaceae	Herb
Cortaderia selloana	Plantae	Tracheophyta	Liliopsida	Poaceae	Herb
Corvus splendens Vieillot, 1817
Cotula coronopifolia	Plantae	Tracheophyta	Magnoliopsida	Asteraceae	Herb
Crepidula fornicata (Linnaeus, 1758)
Cutleria multifida (Turner) Greville 1830
Cyanus segetum	Plantae	Tracheophyta	Magnoliopsida	Asteraceae	Herb
Cydia pomonella (Linnaeus, 1758)
Cyperus difformis	Plantae	Tracheophyta	Liliopsida	Cyperaceae	Herb
Cyprinus carpio Linnaeus, 1758
Dactylopius opuntiae (Cockerell, 1896)
Dysphania multifida	Plantae	Tracheophyta	Magnoliopsida	Amaranthaceae	Herb
Eclipta prostrata	Plantae	Tracheophyta	Magnoliopsida	Asteraceae	Herb
Ehrharta erecta	Plantae	Tracheophyta	Liliopsida	Poaceae	Herb
Eleusine indica	Plantae	Tracheophyta	Liliopsida	Poaceae	Herb
Enneadesmus forficula	Animalia	Arthropoda	Insecta	Bostrichidae
Erigeron bonariensis	Plantae	Tracheophyta	Magnoliopsida	Asteraceae	Herb
Erigeron canadensis	Plantae	Tracheophyta	Magnoliopsida	Asteraceae	Herb
Erigeron karvinskianus	Plantae	Tracheophyta	Magnoliopsida	Asteraceae	Herb
Erigeron sumatrensis	Plantae	Tracheophyta	Magnoliopsida	Asteraceae	Herb
Esox lucius Linnaeus, 1758
Eudendrium carneum Clarke, 1882
Fundulus heteroclitus (Linnaeus, 1766)
Gambusia holbrooki Girard, 1859
Glycaspis brimblecombei Moore, 1964
Gomphocarpus fruticosus	Plantae	Tracheophyta	Magnoliopsida	Apocynaceae	Herb
Hedera helix	Plantae	Tracheophyta	Magnoliopsida	Araliaceae	Herb
Helianthus annuus	Plantae	Tracheophyta	Magnoliopsida	Asteraceae	Herb
Helicoverpa armigera (Hübner, 1808)
Heliotropium curassavicum	Plantae	Tracheophyta	Magnoliopsida	Heliotropiaceae	Herb
Hermetia illucens (Linnaeus, 1758)
Hypoborus ficus	Animalia	Arthropoda	Insecta	Curculionidae
Icerya purchasi Maskell, 1878
Iris albicans	Plantae	Tracheophyta	Liliopsida	Iridaceae	Herb
Iris lutescens	Plantae	Tracheophyta	Liliopsida	Iridaceae	Herb
Lepomis gibbosus (Linnaeus, 1758)
Lepomis macrochirus Rafinesque, 1819
Leptoglossus occidentalis Heidemann, 1910
Linepithema humile (Mayr, 1868)
Linum usitatissimum	Plantae	Tracheophyta	Magnoliopsida	Linaceae	Herb
Lupinus albus	Plantae	Tracheophyta	Magnoliopsida	Fabaceae	Herb
Lupinus luteus	Plantae	Tracheophyta	Magnoliopsida	Fabaceae	Herb
Lyrodus pedicellatus (Quatrefages, 1849)
Magallana gigas (Thunberg, 1793)
Malvastrum coromandelianum	Plantae	Tracheophyta	Magnoliopsida	Malvaceae	Herb
Medicago arborea	Plantae	Tracheophyta	Magnoliopsida	Fabaceae	Herb
Medicago rotata	Plantae	Tracheophyta	Magnoliopsida	Fabaceae	Herb
Megastigmus pinsapinis Hoffmeyer, 1931
Melilotus albus	Plantae	Tracheophyta	Magnoliopsida	Fabaceae	Herb
Mesembryanthemum cordifolium	Plantae	Tracheophyta	Magnoliopsida	Aizoaceae	Herb
Modiola caroliniana	Plantae	Tracheophyta	Magnoliopsida	Malvaceae	Herb
Moluccella laevis	Plantae	Tracheophyta	Magnoliopsida	Lamiaceae	Herb
Mustela nivalis Linnaeus, 1766
Nicotiana glauca	Plantae	Tracheophyta	Magnoliopsida	Solanaceae	Shrub
Nothoscordum borbonicum	Plantae	Tracheophyta	Liliopsida	Amaryllidaceae	Herb
Nylanderia jaegerskioeldi (Mayr, 1904)
Oncorhynchus mykiss (Walbaum, 1792)
Ooencyrtus kuvanae (Howard, 1910)
Ophelimus maskelli (Ashmead, 1900)
Oxalis pes-caprae	Plantae	Tracheophyta	Magnoliopsida	Oxalidaceae	Herb
Oxyura jamaicensis (J. F. Gmelin, 1789)
Panicum miliaceum	Plantae	Tracheophyta	Liliopsida	Poaceae	Herb
Paracerceis sculpta (Holmes, 1904)
Paraleucilla magna Klautau, Monteiro & Borojevic, 2004
Paratrechina longicornis (Latreille, 1802)
Paspalum dilatatum	Plantae	Tracheophyta	Liliopsida	Poaceae	Herb
Paspalum distichum	Plantae	Tracheophyta	Liliopsida	Poaceae	Herb
Paspalum vaginatum	Plantae	Tracheophyta	Liliopsida	Poaceae	Herb
Pennisetum clandestinum	Plantae	Tracheophyta	Liliopsida	Poaceae	Herb
Pennisetum villosum	Plantae	Tracheophyta	Liliopsida	Poaceae	Herb
Phasianus colchicus Linnaeus, 1758
Pheidole indica Mayr, 1879
Pheidole megacephala (Fabricius, 1793)
Phlebotomus (Paraphlebotomus) kazeruni Theodor and Mesghali, 1964]
Pholcus phalangioides (Fuesslin, 1775)
Phoracantha recurva	Animalia	Arthropoda	Insecta	Cerambycidae
Phoracantha semipunctata	Animalia	Arthropoda	Insecta	Cerambycidae
Phyllocnistis citrella Stainton, 1856
Phyllorhiza punctata von Lendenfeld, 1884
Physalia physalis (Linnaeus, 1758)
Physella acuta (Draparnaud, 1805)
Poecilia reticulata	Animalia	Chordata		Poeciliidae
Polyandrocarpa zorritensis (Van Name, 1931)
Polycera hedgpethi Er. Marcus, 1964
Pseudorasbora parva	Animalia	Chordata		Cyprinidae
Rattus norvegicus	Animalia	Chordata	Mammalia	Muridae
Ricinus communis	Plantae	Tracheophyta	Magnoliopsida	Euphorbiaceae	Shrub
Robinia pseudoacacia	Plantae	Tracheophyta	Magnoliopsida	Fabaceae	Tree
Rugulopteryx okamurae (E.Y.Dawson) I.K.Hwang, W.J.Lee & H.S.Kim, 2009
Saccharina japonica (Areschoug) C.E.Lane, C.Mayes, Druehl & G.W.Saunders, 2006
Salpichroa origanifolia	Plantae	Tracheophyta	Magnoliopsida	Solanaceae	Herb
Sambucus nigra	Plantae	Tracheophyta	Magnoliopsida	Viburnaceae	Herb
Sander lucioperca	Animalia	Chordata		Percidae
Sargassum muticum	Chromista	Ochrophyta	Phaeophyceae	Sargassaceae
Scardinius erythrophthalmus (Linnaeus, 1758)
Scleroderma bovista Fries (1829)
Solanum elaeagnifolium	Plantae	Tracheophyta	Magnoliopsida	Solanaceae	Shrub
Soliva stolonifera	Plantae	Tracheophyta	Magnoliopsida	Asteraceae	Herb
Spartina densiflora	Plantae	Tracheophyta	Liliopsida	Poaceae	Herb
Spodoptera littoralis (Boisduval, 1833)
Sporobolus indicus	Plantae	Tracheophyta	Liliopsida	Poaceae	Herb
Stenotaphrum secundatum	Plantae	Tracheophyta	Liliopsida	Poaceae	Herb
Strumigenys membranifera Emery, 1869
Styela plicata (Lesueur, 1823)
Suillus luteus (L.) Roussel (1796)
Symphyotrichum squamatum	Plantae	Tracheophyta	Magnoliopsida	Asteraceae	Herb
Tagetes minuta	Plantae	Tracheophyta	Magnoliopsida	Asteraceae	Herb
Tetramorium bicarinatum (Nylander, 1846)
Tetramorium caldarium (Roger, 1857)
Tetranychus urticae Koch, 1836
Tricellaria inopinata d'Hondt & Occhipinti Ambrogi, 1985
Trichomyrmex destructor (Jerdon, 1851)
Trifolium alexandrinum	Plantae	Tracheophyta	Magnoliopsida	Fabaceae	Herb
Trigonella foenum-graecum	Plantae	Tracheophyta	Magnoliopsida	Fabaceae	Herb
Trogoderma granarium	Animalia	Arthropoda	Insecta	Dermestidae
Tuta absoluta (Meyrick, 1917)
Verbesina encelioides	Plantae	Tracheophyta	Magnoliopsida	Asteraceae	Herb
Xanthium orientale	Plantae	Tracheophyta	Magnoliopsida	Asteraceae	Herb
Xanthium spinosum	Plantae	Tracheophyta	Magnoliopsida	Asteraceae	Herb
Xylomedes coronata	Animalia	Arthropoda	Insecta	Bostrichidae
Zantedeschia aethiopica	Plantae	Tracheophyta	Liliopsida	Araceae	Herb

## Sheet: 3_Raw_GBIF_Download
Scientific_Name	decimalLatitude	decimalLongitude
Abutilon grandifolium (Willd.) Sweet	31.6237	-8.01159
Abutilon grandifolium (Willd.) Sweet	29.9625	-9.65693
Abutilon grandifolium (Willd.) Sweet	33.3795	-7.5666
Abutilon grandifolium (Willd.) Sweet	35.0999	-2.28766
Abutilon grandifolium (Willd.) Sweet	32.3016	-9.23708
Acacia cyanophylla Lindl.	35.1083	-2.2922
Acacia cyclops A.Cunn. ex G.Don	30.0567	-9.65499
Acacia cyclops A.Cunn. ex G.Don	30.0654	-9.66146
Acacia cyclops A.Cunn. ex G.Don	29.1884	-10.2756
Acacia cyclops A.Cunn. ex G.Don	30.0644	-9.66111
Acacia cyclops A.Cunn. ex G.Don	30.0738	-9.66771
Acacia cyclops A.Cunn. ex G.Don	30.2888	-9.56209
Acacia cyclops A.Cunn. ex G.Don	30.0643	-9.66094
Acacia cyclops A.Cunn. ex G.Don	30.0686	-9.66369
Acacia farnesiana (L.) Willd.	31.6295	-7.98108
Acacia farnesiana (L.) Willd.	30.4727	-8.87488
Acacia farnesiana (L.) Willd.	30.4703	-8.87694
Acacia farnesiana (L.) Willd.	35.578	-5.368
Acacia karroo Hayne	32.0597	-6.67852
Acacia karroo Hayne	33.2219	-5.35639
Acacia karroo Hayne	34.5793	-4.42462
Acacia karroo Hayne	34.57	-3.07
Acacia karroo Hayne	34.5667	-3.06667
Acacia karroo Hayne	34.0333	-6.65
Acacia karroo Hayne	34.5387	-6.00115
Acacia karroo Hayne	35.2187	-5.32115
Acacia karroo Hayne	0	0
Acacia melanoxylon R.Br.	30.2146	-9.58895
Acacia melanoxylon R.Br.	33.9537	-6.89761
Acacia melanoxylon R.Br.	35.7905	-5.86187
Acacia melanoxylon R.Br.	35.7935	-5.86446
Acacia melanoxylon R.Br.	30.0608	-9.68445
Acacia melanoxylon R.Br.	30.0691	-9.67827
Acacia melanoxylon R.Br.	30.0536	-9.68445
Acacia melanoxylon R.Br.	30.0536	-9.68582
Acacia melanoxylon R.Br.	30.0355	-9.639
Acacia melanoxylon R.Br.	31.52	-9.77
Acacia melanoxylon R.Br.	34.0167	-6.83333
Acacia saligna (Labill.) H.L.Wendl.	35.1238	-4.48271
Acacia saligna (Labill.) H.L.Wendl.	30.0646	-9.66134
Acacia saligna (Labill.) H.L.Wendl.	30.0725	-9.66621
Acacia saligna (Labill.) H.L.Wendl.	30.0713	-9.66549
Acacia saligna (Labill.) H.L.Wendl.	30.0731	-9.66646
Acacia saligna (Labill.) H.L.Wendl.	30.074	-9.66671
Acacia saligna (Labill.) H.L.Wendl.	30.0684	-9.66342
Acacia saligna (Labill.) H.L.Wendl.	30.0712	-9.665
Acacia saligna (Labill.) H.L.Wendl.	30.0712	-9.665
Acacia saligna (Labill.) H.L.Wendl.	30.0407	-9.65605
Acacia saligna (Labill.) H.L.Wendl.	30.0721	-9.65756
Acacia saligna (Labill.) H.L.Wendl.	30.062	-9.65861
Acacia saligna (Labill.) H.L.Wendl.	30.0591	-9.65724
Acacia saligna (Labill.) H.L.Wendl.	30.0682	-9.66329
Acacia saligna (Labill.) H.L.Wendl.	30.0607	-9.65866
Acacia saligna (Labill.) H.L.Wendl.	30.0613	-9.65908
Acacia saligna (Labill.) H.L.Wendl.	30.3822	-8.69764
Acacia saligna (Labill.) H.L.Wendl.	30.0607	-9.65908
Acacia saligna (Labill.) H.L.Wendl.	30.0683	-9.66332
Acacia saligna (Labill.) H.L.Wendl.	32.2179	-6.53105
Acacia saligna (Labill.) H.L.Wendl.	30.2207	-9.14786
Acacia saligna (Labill.) H.L.Wendl.	31.6803	-7.97522
Acacia saligna (Labill.) H.L.Wendl.	29.5488	-9.3392
Acacia saligna (Labill.) H.L.Wendl.	33.9307	-4.98414
Acacia saligna (Labill.) H.L.Wendl.	30.0783	-9.66947
Acacia saligna (Labill.) H.L.Wendl.	31.2312	-7.98069
Acacia saligna (Labill.) H.L.Wendl.	31.4543	-9.56987
Acacia saligna (Labill.) H.L.Wendl.	33.3762	-7.57762
Acacia saligna (Labill.) H.L.Wendl.	30.074	-9.66669
Acacia saligna (Labill.) H.L.Wendl.	35.7889	-5.80987
Acacia saligna (Labill.) H.L.Wendl.	35.0895	-2.71939
Acacia saligna (Labill.) H.L.Wendl.	30.5303	-7.90983
Acacia saligna (Labill.) H.L.Wendl.	27.9439	-12.9249
Acacia saligna (Labill.) H.L.Wendl.	30.0621	-9.65971
Acacia saligna (Labill.) H.L.Wendl.	34.9052	-2.63652
Acacia saligna (Labill.) H.L.Wendl.	33.5555	-7.67244
Acacia saligna (Labill.) H.L.Wendl.	33.2845	-8.33816
Acacia saligna (Labill.) H.L.Wendl.	33.9515	-6.82437
Acacia saligna (Labill.) H.L.Wendl.	33.4908	-7.59904
Acacia saligna (Labill.) H.L.Wendl.	35.5825	-5.33703
Acacia saligna (Labill.) H.L.Wendl.	33.3816	-7.56812
Acacia saligna (Labill.) H.L.Wendl.	33.3079	-8.35353
Acacia saligna (Labill.) H.L.Wendl.	30.0914	-9.66574
Acacia saligna (Labill.) H.L.Wendl.	30.0791	-9.6391
Acacia saligna (Labill.) H.L.Wendl.	33.4659	-7.60286
Acacia saligna (Labill.) H.L.Wendl.	33.4659	-7.60286
Acacia saligna (Labill.) H.L.Wendl.	33.2975	-4.68018
Acacia saligna (Labill.) H.L.Wendl.	30.0634	-9.66475
Acacia saligna (Labill.) H.L.Wendl.	31.9251	-4.38436
Acacia saligna (Labill.) H.L.Wendl.	30.4032	-9.58727
Acacia saligna (Labill.) H.L.Wendl.	31.5438	-7.53712
Acacia saligna (Labill.) H.L.Wendl.	31.0688	-6.56092
Acacia saligna (Labill.) H.L.Wendl.	31.0688	-6.56092
Acacia saligna (Labill.) H.L.Wendl.	31.0688	-6.56092
Acacia saligna (Labill.) H.L.Wendl.	35.1275	-2.3748
Acacia saligna (Labill.) H.L.Wendl.	35.0287	-5.45115
Aedes albopictus (Skuse, 1894)	33.9768	-6.81839
Aedes albopictus (Skuse, 1894)	33.989	-6.85324
Aedes albopictus (Skuse, 1894)	33.9892	-6.85271
Aedes albopictus (Skuse, 1894)	33.9882	-6.85296
Aedes albopictus (Skuse, 1894)	33.9897	-6.85293
Aedes albopictus (Skuse, 1894)	33.9892	-6.8524
Aedes albopictus (Skuse, 1894)	33.9892	-6.85271
Aedes albopictus (Skuse, 1894)	33.9892	-6.8524
Aedes albopictus (Skuse, 1894)	33.9892	-6.85271
Aedes albopictus (Skuse, 1894)	33.9897	-6.85293
Aedes albopictus (Skuse, 1894)	33.9897	-6.85293
Aedes albopictus (Skuse, 1894)	33.9882	-6.85296
Aedes albopictus (Skuse, 1894)	33.9882	-6.85296
Aedes albopictus (Skuse, 1894)	33.989	-6.85324
Aedes albopictus (Skuse, 1894)	33.989	-6.85324
Aedes albopictus (Skuse, 1894)	33.989	-6.85324
Aedes albopictus (Skuse, 1894)	33.9892	-6.85271
Aedes albopictus (Skuse, 1894)	33.9892	-6.85271
Aedes albopictus (Skuse, 1894)	33.9892	-6.85271
Aedes albopictus (Skuse, 1894)	33.989	-6.85324
Aedes albopictus (Skuse, 1894)	33.9882	-6.85296
Aedes albopictus (Skuse, 1894)	33.989	-6.85324
Aedes albopictus (Skuse, 1894)	33.9897	-6.85293
Aedes albopictus (Skuse, 1894)	33.9892	-6.85271
Aedes albopictus (Skuse, 1894)	33.9892	-6.85271
Aedes albopictus (Skuse, 1894)	34.02	-6.82
Aedes albopictus (Skuse, 1894)	34.02	-6.82
Aedes albopictus (Skuse, 1894)	34.02	-6.82
Agave americana L.	31.2517	-7.97758
Agave americana L.	33.9907	-5.56246
Agave americana L.	31.555	-9.69002
Agave americana L.	33.6097	-7.65063
Agave americana L.	35.0941	-2.67778
Agave americana L.	34.0583	-4.98665
Agave americana L.	34.1223	-4.25944
Agave americana L.	34.0436	-4.99562
Agave americana L.	33.9508	-6.92975
Agave americana L.	33.6096	-7.6506
Agave americana L.	30.1252	-9.6499
Agave americana L.	30.4618	-8.90854
Agave americana L.	34.4136	-2.87958
Agave americana L.	35.1867	-5.27095
Agave americana L.	35.3132	-2.96028
Agave americana L.	33.4327	-5.21546
Agave americana L.	33.4078	-7.54456
Agave americana L.	31.6609	-7.97975
Agave americana L.	32.4759	-7.95108
Agave americana L.	33.5883	-7.68148
Agave americana L.	33.8267	-4.41461
Agave americana L.	34.8548	-2.47273
Agave americana L.	35.1657	-5.25554
Agave americana L.	31.166	-8.04834
Agave americana L.	31.7762	-9.48722
Agave americana L.	34.0098	-6.82044
Agave americana L.	34.2553	-6.66531
Agave americana L.	34.0293	-6.82535
Agave americana L.	34.4125	-2.88026
Agave americana L.	31.3104	-7.75546
Agave americana L.	31.6159	-8.00979
Agave americana L.	34.412	-2.90625
Agave americana L.	34.8931	-2.29519
Agave americana L.	34.9394	-2.72838
Agave americana L.	35.1652	-5.25444
Agave americana L.	34.4105	-2.90572
Agave americana L.	34.8633	-2.46691
Agave americana L.	31.2638	-7.82136
Agave americana L.	34.137	-5.54824
Agave americana L.	31.3153	-7.74392
Agave americana L.	32.6976	-7.77727
Agave americana L.	34.4125	-2.88036
Agave americana L.	33.2215	-8.22678
Agave americana L.	33.4625	-4.67099
Agave americana L.	34.0375	-5.38119
Agave americana L.	31.132	-7.97607
Agave americana L.	32.9236	-5.55965
Agave americana L.	35.1688	-5.25497
Agave americana L.	33.8541	-6.851
Agave americana L.	33.8543	-6.85137
Agave americana L.	33.8016	-4.98762
Agave americana L.	34.0721	-5.5528
Agave americana L.	34.8473	-2.47846
Agave americana L.	31.4127	-7.83713
Agave americana L.	33.2983	-8.35204
Agave americana L.	34.0081	-6.82006
Agave americana L.	29.8887	-9.23413
Agave americana L.	31.1931	-8.05791
Agave americana L.	33.5908	-7.64222
Agave americana L.	34.2449	-6.68041
Agave americana L.	33.824	-4.70104
Agave americana L.	33.9638	-5.54626
Agave americana L.	34.126	-5.5502
Agave americana L.	32.2734	-4.48685
Agave americana L.	31.7582	-7.99111
Agave americana L.	35.1677	-5.25507
Agave americana L.	35.7353	-5.93055
Agave americana L.	33.8039	-5.51367
Agave americana L.	33.9522	-6.92568
Agave americana L.	31.6404	-8.00316
Agave americana L.	35.1686	-5.25502
Agave americana L.	35.1723	-5.26477
Agave americana L.	35.1709	-5.25759
Agave americana L.	33.0912	-5.3876
Agave americana L.	32.9207	-5.57879
Agave americana L.	35.1675	-5.2551
Agave americana L.	34.0701	-4.97983
Agave americana L.	34.006	-6.82084
Agave americana L.	31.7917	-7.09262
Agave americana L.	35.1658	-5.25552
Agave americana L.	33.6987	-7.29629
Agave americana L.	34.0321	-4.98416
Agave americana L.	34.0049	-6.71837
Agave americana L.	33.959	-6.51139
Agave americana L.	34.0072	-6.8216
Agave americana L.	35.1444	-2.42752
Agave americana L.	35.2587	-5.33115
Agave americana subsp. americana	33.6034	-7.66034
Agave americana subsp. americana	34.9394	-2.72839
Agave sisalana Perrine	34.4031	-2.91814
Agave sisalana Perrine	34.2553	-6.66531
Agave sisalana Perrine	33.8497	-6.78221
Agave sisalana Perrine	34.4032	-2.91822
Agave sisalana Perrine	31.3907	-7.84044
Ailanthus altissima (Mill.) Swingle	35.1705	-5.27151
Ailanthus altissima (Mill.) Swingle	31.6258	-7.99955
Ailanthus altissima (Mill.) Swingle	34.0113	-6.84976
Ailanthus altissima (Mill.) Swingle	34.4205	-2.88817
Ailanthus altissima (Mill.) Swingle	34.0304	-5.00448
Ailanthus altissima (Mill.) Swingle	34.0301	-5.00452
Ailanthus altissima (Mill.) Swingle	31.6308	-7.85734
Ailanthus altissima (Mill.) Swingle	34.4301	-2.88841
Ailanthus altissima (Mill.) Swingle	34.4206	-2.8877
Ailanthus altissima (Mill.) Swingle	31.6238	-7.99418
Ailanthus altissima (Mill.) Swingle	33.3626	-4.73363
Ailanthus altissima (Mill.) Swingle	34.682	-1.90016
Ailanthus altissima (Mill.) Swingle	33.43	-5.2275
Ailanthus altissima (Mill.) Swingle	33.7629	-5.48567
Ailanthus altissima (Mill.) Swingle	33.881	-5.55781
Ailanthus altissima (Mill.) Swingle	33.8798	-5.5587
Ailanthus altissima (Mill.) Swingle	31.6242	-7.94706
Aloe vera (L.) Burm.f.	34.0027	-6.84479
Aloe vera (L.) Burm.f.	31.6431	-8.00323
Aloe vera (L.) Burm.f.	30.3236	-5.82499
Aloe vera (L.) Burm.f.	30.4269	-9.59712
Amaranthus albus L.	31.5317	-8.06544
Amaranthus albus L.	31.5199	-7.90224
Amaranthus albus L.	33.217	-8.04059
Amaranthus albus L.	32.4553	-7.63639
Amaranthus albus L.	32.335	-6.357
Amaranthus albus L.	35.03	-4.15
Amaranthus albus L.	35.1715	-4.98546
Amaranthus albus L.	34.873	-4.618
Amaranthus albus L.	34.8287	-3.01111
Amaranthus albus L.	34.6787	-2.9711
Amaranthus albus L.	35.1587	-4.98115
Amaranthus albus L.	35.1087	-5.28115
Amaranthus albus L.	35.1667	-4.98333
Amaranthus blitoides S.Watson	32.3173	-6.49992
Amaranthus blitoides S.Watson	34.5542	-1.85636
Amaranthus blitoides S.Watson	33.8429	-5.47518
Amaranthus blitoides S.Watson	33.2953	-8.22556
Amaranthus blitoides S.Watson	33.5581	-7.27649
Amaranthus blitoides S.Watson	33.1492	-8.41083
Amaranthus blitoides S.Watson	35.1697	-5.25842
Amaranthus blitoides S.Watson	33.5	-7.83333
Amaranthus blitoides S.Watson	32.1558	-7.02417
Amaranthus blitoides S.Watson	32.1558	-7.02417
Amaranthus blitoides S.Watson	35.68	-5.33
Amaranthus blitoides S.Watson	35.2156	-6.12793
Amaranthus blitoides S.Watson	34.714	-5.99749
Amaranthus blitoides S.Watson	35.32	-2.98
Amaranthus blitoides S.Watson	34.146	-4.01273
Amaranthus blitoides S.Watson	35.8239	-5.64917
Amaranthus blitoides S.Watson	35.4265	-5.11737
Amaranthus blitoides S.Watson	34.02	-4.62
Amaranthus blitoides S.Watson	34.8787	-2.8711
Amaranthus blitoides S.Watson	34.8187	-2.6711
Amaranthus blitoides S.Watson	35.4287	-5.11115
Amaranthus blitoides S.Watson	35.2487	-5.29115
Amaranthus blitoides S.Watson	35.4333	-5.11667
Amaranthus blitoides S.Watson	34.2833	-3.96667
Amaranthus blitoides S.Watson	34.6833	-3.51667
Amaranthus blitoides S.Watson	35.3167	-2.98333
Amaranthus blitoides S.Watson	35.6833	-5.33333
Amaranthus blitoides S.Watson	35.8333	-5.65
Amaranthus blitum L.	35.7888	-5.5022
Amaranthus blitum subsp. blitum	35.7996	-5.56506
Amaranthus deflexus L.	31.4417	-9.67554
Amaranthus deflexus L.	34.7182	-1.91551
Amaranthus deflexus L.	35.2077	-4.66739
Amaranthus deflexus L.	35.1587	-6.09117
Amaranthus deflexus L.	35.4087	-5.09115
Amaranthus deflexus L.	35.1587	-6.09117
Amaranthus deflexus L.	35.4087	-5.10115
Amaranthus deflexus L.	35.2687	-5.25115
Amaranthus deflexus L.	35.1987	-5.31115
Amaranthus deflexus L.	35.4167	-5.1
Amaranthus deflexus L.	31.3673	-7.79182
Amaranthus hybridus L.	34.9446	-2.73129
Amaranthus hybridus L.	32.1558	-7.02417
Amaranthus hybridus L.	32.1558	-7.02417
Amaranthus hybridus L.	32.1558	-7.02417
Amaranthus hybridus L.	32.1558	-7.02417
Amaranthus hybridus L.	35.1	-5.27
Amaranthus hybridus L.	34.9938	-6.20639
Amaranthus hybridus L.	35.2156	-6.12793
Amaranthus hybridus L.	34.9938	-6.20639
Amaranthus hybridus L.	34.1477	-4.01067
Amaranthus hybridus L.	34.1474	-4.01102
Amaranthus hybridus L.	34.1474	-4.01102
Amaranthus hybridus L.	35.0728	-6.0912
Amaranthus hybridus L.	34.873	-4.618
Amaranthus hybridus L.	35.1087	-5.28115
Amaranthus hybridus L.	35.3667	-5.03333
Amaranthus hybridus L.	35.4333	-5.11667
Amaranthus hypochondriacus L.	35.25	-5.28333
Amaranthus hypochondriacus L.	31.3673	-7.79182
Amaranthus muricatus (Gillies ex Moq.) Hieron.	33.6035	-7.63178
Amaranthus muricatus (Gillies ex Moq.) Hieron.	33.6045	-7.61933
Amaranthus muricatus (Gillies ex Moq.) Hieron.	33.5917	-7.62377
Amaranthus muricatus (Gillies ex Moq.) Hieron.	33.5941	-7.63444
Amaranthus muricatus (Gillies ex Moq.) Hieron.	33.5941	-7.63444
Amaranthus muricatus (Gillies ex Moq.) Hieron.	29.8839	-9.5825
Amaranthus muricatus (Gillies ex Moq.) Hieron.	30.85	-8.38333
Amaranthus muricatus (Gillies ex Moq.) Hieron.	29.13	-10.03
Amaranthus powellii S.Watson	35.1387	-5.11115
Amaranthus powellii S.Watson	35.3587	-5.03115
Amaranthus powellii S.Watson	35.4287	-5.12115
Amaranthus powellii S.Watson	35.2487	-5.28115
Amaranthus powellii S.Watson	35.0987	-5.26115
Amaranthus powellii S.Watson	35.1487	-5.11115
Amaranthus powellii S.Watson	35.4287	-5.11115
Amaranthus powellii S.Watson	35.0987	-5.26115
Amaranthus powellii S.Watson	35.3587	-5.03115
Amaranthus powellii S.Watson	35.2487	-5.28115
Amaranthus powellii S.Watson	35.15	-5.11667
Amaranthus retroflexus L.	33.8967	-5.6239
Amaranthus retroflexus L.	35.2156	-6.12793
Amaranthus retroflexus L.	35.8	-5.56667
Amaranthus viridis L.	33.5262	-5.11515
Amaranthus viridis L.	31.7484	-7.96836
Amaranthus viridis L.	30.9238	-6.93063
Amaranthus viridis L.	34.412	-2.90625
Amaranthus viridis L.	31.6359	-8.01704
Amaranthus viridis L.	34.43	-2.88
Amaranthus viridis L.	34.059	-5.52098
Amaranthus viridis L.	34.3151	-6.48395
Amaranthus viridis L.	35.2156	-6.12793
Amaranthus viridis L.	35.68	-5.33
Amaranthus viridis L.	35.7996	-5.56506
Amaranthus viridis L.	35.2077	-4.66739
Amaranthus viridis L.	35.8239	-5.64917
Amaranthus viridis L.	35.29	-2.986
Amaranthus viridis L.	35.28	-2.94
Amaranthus viridis L.	35.28	-2.94
Amaranthus viridis L.	35.28	-2.94
Amaranthus viridis L.	35.28	-2.94
Amaranthus viridis L.	35.28	-2.94
Amaranthus viridis L.	35.28	-2.94
Amaranthus viridis L.	35.0787	-2.21109
Amaranthus viridis L.	34.3087	-3.2811
Amaranthus viridis L.	33.9833	-5.58333
Apate monachus Fabricius, 1775	30.4278	-9.59811
Apate monachus Fabricius, 1775	29.1819	-8.7903
Apate monachus Fabricius, 1775	31.6092	-8.0187
Apate monachus Fabricius, 1775	31.6092	-8.0187
Apate monachus Fabricius, 1775	29.1819	-8.7903
Aphanius fasciatus (Valenciennes, 1821)	35.1239	-2.34121
Aphanius fasciatus (Valenciennes, 1821)	35.1136	-2.34589
Arctotheca calendula (L.) Levyns	34.0045	-6.44906
Arctotheca calendula (L.) Levyns	33.5865	-7.68762
Arctotheca calendula (L.) Levyns	33.607	-7.65238
Arctotheca calendula (L.) Levyns	35.7654	-5.93517
Arctotheca calendula (L.) Levyns	33.5267	-7.80559
Arctotheca calendula (L.) Levyns	35.4672	-6.03873
Arctotheca calendula (L.) Levyns	29.7494	-8.96026
Arctotheca calendula (L.) Levyns	35.7649	-5.9358
Arctotheca calendula (L.) Levyns	35.7794	-5.80059
Arctotheca calendula (L.) Levyns	33.6087	-7.62945
Arctotheca calendula (L.) Levyns	35.2387	-5.17641
Arctotheca calendula (L.) Levyns	33.8467	-7.09922
Arctotheca calendula (L.) Levyns	35.26	-2.91965
Arctotheca calendula (L.) Levyns	35.7843	-5.81674
Arctotheca calendula (L.) Levyns	35.7906	-5.81674
Arctotheca calendula (L.) Levyns	33.752	-6.18487
Arctotheca calendula (L.) Levyns	35.7796	-5.79812
Arctotheca calendula (L.) Levyns	34.4137	-2.88609
Arctotheca calendula (L.) Levyns	34.8699	-6.27985
Arctotheca calendula (L.) Levyns	34.0108	-6.85011
Arctotheca calendula (L.) Levyns	33.5105	-7.83464
Arctotheca calendula (L.) Levyns	35.4331	-6.0428
Arctotheca calendula (L.) Levyns	34.8699	-6.27985
Arctotheca calendula (L.) Levyns	35.5744	-5.98863
Arctotheca calendula (L.) Levyns	34.0298	-6.82866
Arctotheca calendula (L.) Levyns	34.0306	-6.83059
Arctotheca calendula (L.) Levyns	35.7802	-5.80112
Arctotheca calendula (L.) Levyns	35.4646	-6.03087
Arctotheca calendula (L.) Levyns	34.8509	-6.2953
Arctotheca calendula (L.) Levyns	33.9672	-6.88952
Arctotheca calendula (L.) Levyns	34.24	-5.75832
Arctotheca calendula (L.) Levyns	33.9634	-6.86776
Arctotheca calendula (L.) Levyns	33.8158	-6.92788
Arctotheca calendula (L.) Levyns	34.2469	-6.68028
Arctotheca calendula (L.) Levyns	33.9897	-6.4524
Arctotheca calendula (L.) Levyns	34.8868	-6.29419
Arctotheca calendula (L.) Levyns	34.876	-6.29391
Arctotheca calendula (L.) Levyns	33.7307	-5.02348
Arctotheca calendula (L.) Levyns	34.221	-6.64914
Arctotheca calendula (L.) Levyns	35.4726	-6.0281
Arctotheca calendula (L.) Levyns	33.9299	-6.82906
Arctotheca calendula (L.) Levyns	33.5463	-7.75952
Arctotheca calendula (L.) Levyns	33.5452	-7.75852
Arctotheca calendula (L.) Levyns	33.5457	-7.75938
Arctotheca calendula (L.) Levyns	33.9272	-6.96059
Arctotheca calendula (L.) Levyns	33.544	-7.76652
Arctotheca calendula (L.) Levyns	33.4739	-7.7868
Arctotheca calendula (L.) Levyns	33.4934	-7.90642
Arctotheca calendula (L.) Levyns	33.4736	-7.7874
Arctotheca calendula (L.) Levyns	34.2512	-6.66602
Arctotheca calendula (L.) Levyns	33.9299	-6.82906
Arctotheca calendula (L.) Levyns	34.2479	-6.68044
Arctotheca calendula (L.) Levyns	35.0999	-2.28766
Arctotheca calendula (L.) Levyns	34.0269	-6.83001
Arctotheca calendula (L.) Levyns	34.0099	-6.84709
Arctotheca calendula (L.) Levyns	31.4835	-9.76694
Arctotheca calendula (L.) Levyns	34.2634	-6.63211
Arctotheca calendula (L.) Levyns	33.8964	-6.83223
Arctotheca calendula (L.) Levyns	33.5362	-7.79408
Arctotheca calendula (L.) Levyns	33.5581	-7.57917
Arctotheca calendula (L.) Levyns	33.9339	-6.82237
Arctotheca calendula (L.) Levyns	34.2616	-6.5824
Arctotheca calendula (L.) Levyns	35.7535	-5.34929
Arctotheca calendula (L.) Levyns	33.9587	-6.84502
Arctotheca calendula (L.) Levyns	33.3055	-8.35774
Arctotheca calendula (L.) Levyns	33.3102	-8.35031
Arctotheca calendula (L.) Levyns	34.2476	-6.68179
Arctotheca calendula (L.) Levyns	33.972	-6.86807
Arctotheca calendula (L.) Levyns	33.8858	-7.01806
Arctotheca calendula (L.) Levyns	33.5457	-7.75925
Arctotheca calendula (L.) Levyns	33.5457	-7.7594
Arctotheca calendula (L.) Levyns	33.5456	-7.75933
Arctotheca calendula (L.) Levyns	33.9472	-6.93375
Arctotheca calendula (L.) Levyns	34.296	-6.49281
Arctotheca calendula (L.) Levyns	34.2946	-6.48796
Arctotheca calendula (L.) Levyns	33.985	-6.86213
Arctotheca calendula (L.) Levyns	34.1064	-6.34515
Arctotheca calendula (L.) Levyns	33.9757	-6.89902
Arctotheca calendula (L.) Levyns	35.4639	-6.04203
Arctotheca calendula (L.) Levyns	35.4126	-5.06836
Arctotheca calendula (L.) Levyns	33.4792	-7.96025
Arctotheca calendula (L.) Levyns	34.21	-6.37
Arctotheca calendula (L.) Levyns	35.4599	-5.0966
Arctotheca calendula (L.) Levyns	35.1474	-4.36008
Arctotheca calendula (L.) Levyns	35.7751	-5.78138
Arctotheca calendula (L.) Levyns	33.9502	-6.84841
Arctotheca calendula (L.) Levyns	33.9614	-6.885
Arctotheca calendula (L.) Levyns	33.9329	-6.82562
Arctotheca calendula (L.) Levyns	33.9614	-6.885
Arctotheca calendula (L.) Levyns	33.9614	-6.885
Arctotheca calendula (L.) Levyns	35.4729	-6.02776
Arctotheca calendula (L.) Levyns	35.4729	-6.02776
Arctotheca calendula (L.) Levyns	33.9152	-6.85141
Arctotheca calendula (L.) Levyns	33.9152	-6.85141
Arctotheca calendula (L.) Levyns	34.0186	-6.83954
Arctotheca calendula (L.) Levyns	34.0462	-6.83007
Arctotheca calendula (L.) Levyns	35.7766	-5.79379
Arctotheca calendula (L.) Levyns	34.0167	-6.3
Arctotheca calendula (L.) Levyns	35.8	-5.35
Arctotheca calendula (L.) Levyns	35.9167	-5.46667
Arctotheca calendula (L.) Levyns	35.9167	-5.46667
Arctotheca calendula (L.) Levyns	34.2387	-6.53116
Arctotheca calendula (L.) Levyns	34.8787	-8.3712
Arctotheca calendula (L.) Levyns	35.4387	-5.09115
Arctotheca calendula (L.) Levyns	35.9087	-5.46117
Arctotheca calendula (L.) Levyns	35.7987	-5.35116
Arctotheca calendula (L.) Levyns	35.7287	-5.35116
Arctotheca calendula (L.) Levyns	35.1987	-8.52121
Arctotheca calendula (L.) Levyns	35.1787	-5.25115
Arctotheca calendula (L.) Levyns	35.4487	-5.10115
Arctotheca calendula (L.) Levyns	35.0787	-5.45115
Arctotheca calendula (L.) Levyns	35.8	-5.35
Arctotheca calendula (L.) Levyns	34.8742	-6.2542
Argiope trifasciata (Forsskål, 1775)	30.4174	-9.60357
Argiope trifasciata (Forsskål, 1775)	30.4175	-9.60355
Argiope trifasciata (Forsskål, 1775)	30.4067	-9.53429
Argiope trifasciata (Forsskål, 1775)	35.7272	-5.91303
Argiope trifasciata (Forsskål, 1775)	33.9669	-6.85175
Argiope trifasciata (Forsskål, 1775)	34.03	-6.83548
Argiope trifasciata (Forsskål, 1775)	35.7272	-5.91306
Argiope trifasciata (Forsskål, 1775)	33.5777	-7.5396
Argiope trifasciata (Forsskål, 1775)	31.4977	-9.76216
Argiope trifasciata (Forsskål, 1775)	33.2297	-8.50143
Argiope trifasciata (Forsskål, 1775)	33.9117	-6.91462
Argiope trifasciata (Forsskål, 1775)	33.9481	-6.86954
Argiope trifasciata (Forsskål, 1775)	31.3371	-7.75638
Argiope trifasciata (Forsskål, 1775)	33.589	-7.64651
Argiope trifasciata (Forsskål, 1775)	35.2569	-2.92015
Argiope trifasciata (Forsskål, 1775)	34.2163	-5.69207
Argiope trifasciata (Forsskål, 1775)	32.3861	-6.3236
Argiope trifasciata (Forsskål, 1775)	32.3862	-6.32366
Argiope trifasciata (Forsskål, 1775)	34.9254	-2.71467
Argiope trifasciata (Forsskål, 1775)	34.2391	-6.67367
Argiope trifasciata (Forsskål, 1775)	34.2526	-6.66735
Argiope trifasciata (Forsskål, 1775)	34.125	-6.59085
Argiope trifasciata (Forsskål, 1775)	35.2838	-2.96563
Argiope trifasciata (Forsskål, 1775)	35.2844	-2.96514
Argiope trifasciata (Forsskål, 1775)	34.682	-1.90016
Argiope trifasciata (Forsskål, 1775)	35.2032	-3.91288
Argiope trifasciata (Forsskål, 1775)	34.682	-1.90016
Argiope trifasciata (Forsskål, 1775)	34.682	-1.90016
Argiope trifasciata (Forsskål, 1775)	33.9902	-6.82994
Argiope trifasciata (Forsskål, 1775)	35.1572	-6.10026
Argiope trifasciata (Forsskål, 1775)	30.4092	-9.22991
Argiope trifasciata (Forsskål, 1775)	33.5566	-7.73967
Argiope trifasciata (Forsskål, 1775)	30.0715	-9.6575
Argiope trifasciata (Forsskål, 1775)	35.3106	-2.96249
Argiope trifasciata (Forsskål, 1775)	34.0302	-6.83556
Argiope trifasciata (Forsskål, 1775)	33.37	-7.58572
Argiope trifasciata (Forsskål, 1775)	33.37	-7.58572
Argiope trifasciata (Forsskål, 1775)	33.9972	-6.85542
Argiope trifasciata (Forsskål, 1775)	35.1068	-5.29019
Artemia franciscana Kellogg, 1906	45.1119	-2.74389
Artemia franciscana Kellogg, 1906	45.1119	-2.74389
Artemia franciscana Kellogg, 1906	45.1119	-2.74389
Artemia franciscana Kellogg, 1906	45.1119	-2.74389
Arundo donax L.	30.5595	-9.54617
Arundo donax L.	30.5887	-9.52618
Arundo donax L.	34.0735	-5.553
Arundo donax L.	34.0539	-5.53255
Arundo donax L.	34.0735	-5.5531
Arundo donax L.	34.0542	-5.52012
Arundo donax L.	34.0735	-5.55304
Arundo donax L.	35.2372	-5.17633
Arundo donax L.	31	-8.15637
Arundo donax L.	30.4188	-9.6035
Arundo donax L.	31.6031	-8.01406
Arundo donax L.	31.657	-8.07723
Arundo donax L.	30.5786	-7.15624
Arundo donax L.	31.5106	-9.7661
Arundo donax L.	31.3622	-7.94835
Arundo donax L.	32.0161	-6.71865
Arundo donax L.	30.0721	-9.65756
Arundo donax L.	33.61	-7.65052
Arundo donax L.	31.4445	-5.45244
Arundo donax L.	31.5485	-7.60104
Arundo donax L.	31.5833	-5.59135
Arundo donax L.	31.3626	-4.73879
Arundo donax L.	31.449	-5.97015
Arundo donax L.	33.6074	-7.6522
Arundo donax L.	33.6033	-7.62816
Arundo donax L.	33.599	-7.66037
Arundo donax L.	31.1717	-6.5042
Arundo donax L.	33.607	-7.65009
Arundo donax L.	33.6037	-7.65979
Arundo donax L.	33.9569	-6.85335
Arundo donax L.	33.9309	-5.56339
Arundo donax L.	35.1701	-5.25691
Arundo donax L.	30.5052	-9.67293
Arundo donax L.	31.0465	-7.131
Arundo donax L.	30.4734	-7.74061
Arundo donax L.	30.6669	-6.31302
Arundo donax L.	31.5747	-5.89176
Arundo donax L.	31.0516	-7.17902
Arundo donax L.	31.1313	-7.12494
Arundo donax L.	30.9903	-7.2045
Arundo donax L.	31.2891	-7.96138
Arundo donax L.	31.2891	-7.96138
Arundo donax L.	31.4477	-7.43326
Arundo donax L.	30.9364	-7.3257
Arundo donax L.	34.0328	-6.83598
Arundo donax L.	34.0329	-6.83601
Arundo donax L.	31.2517	-7.28108
Arundo donax L.	30.8233	-7.34417
Arundo donax L.	29.3416	-10.1994
Arundo donax L.	31.1697	-7.10223
Arundo donax L.	31.6581	-7.97271
Arundo donax L.	29.5844	-8.90139
Arundo donax L.	29.7508	-9.24189
Arundo donax L.	30.5879	-9.52797
Arundo donax L.	35.7905	-5.92372
Arundo donax L.	30.5888	-9.52792
Arundo donax L.	35.1664	-5.25498
Arundo donax L.	31.1674	-8.04344
Arundo donax L.	31.2072	-7.25683
Arundo donax L.	31.413	-9.58883
Arundo donax L.	33.9011	-5.54591
Arundo donax L.	31.1956	-6.20616
Arundo donax L.	30.9244	-6.90764
Arundo donax L.	34.035	-5.00265
Arundo donax L.	34.0324	-5.0307
Arundo donax L.	29.7249	-8.973
Arundo donax L.	34.0582	-4.9825
Arundo donax L.	34.9265	-2.71443
Arundo donax L.	31.1454	-7.41827
Arundo donax L.	31.1456	-7.41748
Arundo donax L.	31.5698	-5.58281
Arundo donax L.	35.4521	-5.39772
Arundo donax L.	31.5261	-5.53277
Arundo donax L.	31.5283	-5.52893
Arundo donax L.	34.0557	-4.97474
Arundo donax L.	32.1568	-4.37446
Arundo donax L.	33.9223	-6.92535
Arundo donax L.	33.982	-6.87158
Arundo donax L.	33.9053	-6.94401
Arundo donax L.	33.5542	-7.67164
Arundo donax L.	31.0983	-3.95034
Arundo donax L.	34.0433	-5.06149
Arundo donax L.	34.0499	-4.99175
Arundo donax L.	34.0499	-4.99175
Arundo donax L.	31.6481	-8.02041
Arundo donax L.	31.6719	-7.93438
Arundo donax L.	35.0484	-2.21897
Arundo donax L.	32.7264	-9.04684
Arundo donax L.	31.5905	-9.24228
Arundo donax L.	35.4638	-6.03784
Arundo donax L.	31.6054	-7.82463
Arundo donax L.	34.8484	-4.99111
Arundo donax L.	32.2498	-3.96749
Arundo donax L.	33.2902	-8.34734
Arundo donax L.	32.0177	-6.72414
Arundo donax L.	32.0161	-6.72128
Arundo donax L.	32.0151	-6.71951
Arundo donax L.	31.17	-8.0661
Arundo donax L.	35.624	-5.29442
Arundo donax L.	32.4068	-4.15806
Arundo donax L.	34	-6.67163
Arundo donax L.	33.6878	-7.40374
Arundo donax L.	34.08	-4.91617
Arundo donax L.	29.8856	-9.22349
Arundo donax L.	32.9974	-8.72592
Arundo donax L.	31.6761	-7.96598
Arundo donax L.	34.0054	-6.82095
Arundo donax L.	31.5442	-5.51688
Arundo donax L.	34.6397	-4.28027
Arundo donax L.	33.5776	-7.29495
Arundo donax L.	35.1896	-2.83786
Arundo donax L.	35.7903	-5.92399
Arundo donax L.	34.0236	-4.98865
Arundo donax L.	35.7584	-5.82124
Arundo donax L.	35.6968	-5.81223
Arundo donax L.	34.0524	-5.53423
Arundo donax L.	34.0729	-5.55493
Arundo donax L.	31.0458	-7.12737
Arundo donax L.	31.2263	-7.26337
Arundo donax L.	32.337	-6.34258
Arundo donax L.	31.1181	-7.04997
Arundo donax L.	31.166	-7.18913
Arundo donax L.	31.181	-7.11411
Arundo donax L.	32.0112	-6.64245
Arundo donax L.	32.0314	-6.66707
Arundo donax L.	32.1454	-6.61718
Arundo donax L.	32.1021	-6.61791
Arundo donax L.	35.1697	-5.25731
Arundo donax L.	31.5102	-8.01661
Arundo donax L.	31.5367	-7.50091
Arundo donax L.	29.3183	-10.1336
Arundo donax L.	34.007	-6.81973
Arundo donax L.	34.6096	-4.78996
Arundo donax L.	32.1	-4.3833
Arundo donax L.	34.0708	-5.53642
Arundo donax L.	34.8333	-2.68333
Arundo donax L.	35.5468	-5.2347
Arundo donax L.	31.6344	-8.00016
Arundo donax L.	28.1	-9.35
Arundo donax L.	34.5587	-3.0211
Arundo donax L.	34.3087	-3.2811
Arundo donax L.	35.5387	-5.37116
Arundo donax L.	35.7987	-5.60117
Arundo donax L.	34.8087	-5.35115
Arundo donax L.	32.0387	-3.05107
Arundo donax L.	34.6087	-4.79113
Arundo donax L.	35.2687	-5.25115
Arundo donax L.	35.4087	-5.11115
Arundo donax L.	35.2487	-5.05115
Arundo donax L.	35.0887	-5.46115
Arundo donax L.	35.4487	-5.15115
Arundo donax L.	35.7187	-5.27116
Arundo donax L.	35.7187	-5.38116
Arundo donax L.	35.7187	-5.27116
Arundo donax L.	34.0187	-6.73116
Arundo donax L.	35.4167	-5.11667
Arundo donax L.	35.25	-5.05
Asclepias curassavica L.	33.608	-7.63277
Asclepias curassavica L.	33.592	-7.62423
Asclepias curassavica L.	30.6261	-8.15206
Asclepias curassavica L.	30.6965	-8.1543
Asclepias curassavica L.	32.7394	-9.02343
Asclepias curassavica L.	34.0073	-6.81956
Asclepias curassavica L.	34.4042	-2.86964
Asclepias curassavica L.	30.6894	-8.14369
Asclepias curassavica L.	30.3969	-8.69393
Asclepias curassavica L.	30.3924	-8.6988
Asclepias curassavica L.	29.7642	-8.95806
Asclepias curassavica L.	34.0059	-6.82039
Asclepias curassavica L.	33.9354	-6.77985
Asclepias curassavica L.	35.9085	-5.40069
Asclepias curassavica L.	34.1732	-5.99432
Asclepias curassavica L.	30.564	-8.70214
Asclepias curassavica L.	31.5197	-7.90219
Asclepias curassavica L.	31.5195	-7.90202
Asclepias curassavica L.	34.0186	-6.81698
Asclepias curassavica L.	30.3747	-9.32111
Asclepias curassavica L.	33.9894	-6.82704
Asclepias curassavica L.	34.0113	-6.84908
Asclepias curassavica L.	34.2221	-6.66951
Asclepias curassavica L.	34.0078	-6.80379
Asclepias curassavica L.	35.0999	-2.28766
Asclepias curassavica L.	34.0061	-6.82027
Asclepias curassavica L.	34.258	-6.6719
Asclepias curassavica L.	33.5536	-7.63796
Asclepias curassavica L.	35.0999	-2.28766
Asclepias curassavica L.	35.0999	-2.28766
Asclepias curassavica L.	33.9534	-6.89531
Asclepias curassavica L.	34.0112	-6.84929
Asclepias curassavica L.	33.9842	-5.05305
Asclepias curassavica L.	33.9534	-6.89531
Asclepias curassavica L.	30.7541	-8.76254
Asclepias curassavica L.	34.0138	-6.78511
Asclepias curassavica L.	34.0061	-6.82025
Asclepias curassavica L.	35.7809	-5.76571
Asclepias curassavica L.	34.0139	-6.78293
Asclepias curassavica L.	34.491	-5.5135
Asclepias curassavica L.	33.9895	-6.82706
Asclepias curassavica L.	30.4149	-9.60091
Asclepias curassavica L.	30.4149	-9.60091
Asclepias curassavica L.	34.0164	-6.8193
Asclepias curassavica L.	32.3311	-6.33839
Asclepias curassavica L.	30.4273	-9.59226
Asclepias curassavica L.	33.9103	-5.50738
Asclepias curassavica L.	0	0
Asclepias curassavica L.	30.0833	-8.15
Asclepias curassavica L.	29.9167	-9.66666
Asclepias curassavica L.	35.9094	-5.38722
Asparagus asparagoides (L.) Druce	-6	37.7167
Astacus astacus (Linnaeus, 1758)	33.4887	-5.18932
Astacus astacus (Linnaeus, 1758)	33.422	-5.13853
Astacus astacus (Linnaeus, 1758)	33.5208	-5.09789
Aster squamatus (Spreng.) Hieron.	35.1	-3.81667
Aster squamatus (Spreng.) Hieron.	35.2833	-5.23333
Aster squamatus (Spreng.) Hieron.	34.4333	-2.88333
Aster squamatus (Spreng.) Hieron.	35.4	-5.16667
Aster squamatus (Spreng.) Hieron.	35.6833	-5.33333
Atherina boyeri Risso, 1810	33.6076	-7.64926
Atherina boyeri Risso, 1810	34.4646	-5.51086
Atherina boyeri Risso, 1810	34.47	-5.51
Atriplex canescens (Pursh) Nutt.	33.571	-7.6021
Atriplex nummularia Lindl.	30.62	-8.09222
Atriplex nummularia Lindl.	31.4539	-4.23917
Atriplex semibaccata R.Br.	30.0035	-9.64707
Atriplex semibaccata R.Br.	31.5486	-7.60061
Atriplex semibaccata R.Br.	28.9567	-10.1139
Atriplex semibaccata R.Br.	28.9113	-10.1653
Atriplex semibaccata R.Br.	29.9454	-9.63989
Atriplex semibaccata R.Br.	30.9887	-9.0413
Atriplex semibaccata R.Br.	31.5315	-9.59736
Atriplex semibaccata R.Br.	33.3749	-7.58036
Atriplex semibaccata R.Br.	33.3756	-7.57727
Atriplex semibaccata R.Br.	33.3764	-7.57908
Atriplex semibaccata R.Br.	33.3755	-7.57561
Atriplex semibaccata R.Br.	33.3751	-7.57679
Atriplex semibaccata R.Br.	31.4701	-9.77055
Atriplex semibaccata R.Br.	31.3255	-7.76031
Atriplex semibaccata R.Br.	32.3769	-3.66354
Atriplex semibaccata R.Br.	29.1754	-10.0931
Atriplex semibaccata R.Br.	30.5075	-9.68569
Atriplex semibaccata R.Br.	30.3492	-9.56692
Atriplex semibaccata R.Br.	30.3492	-9.56692
Atriplex semibaccata R.Br.	33.0246	-4.06811
Atriplex semibaccata R.Br.	31.0694	-6.5781
Atriplex semibaccata R.Br.	31.6061	-7.82487
Atriplex semibaccata R.Br.	34.682	-1.90016
Atriplex semibaccata R.Br.	34.0171	-6.85032
Atriplex semibaccata R.Br.	34.0177	-6.85715
Atriplex semibaccata R.Br.	34.0215	-3.24654
Atriplex semibaccata R.Br.	32.0021	-8.09976
Atriplex semibaccata R.Br.	31.5613	-8.47444
Atriplex semibaccata R.Br.	31.5668	-8.47981
Atriplex semibaccata R.Br.	32.1515	-7.24645
Atriplex semibaccata R.Br.	30.3772	-9.44976
Atriplex semibaccata R.Br.	31.0941	-9.81807
Atriplex semibaccata R.Br.	31.6453	-7.83139
Atriplex semibaccata R.Br.	32.053	-7.78813
Atriplex semibaccata R.Br.	31.9533	-7.10806
Atriplex semibaccata R.Br.	31.9533	-7.10806
Atriplex semibaccata R.Br.	30.4246	-9.6092
Atriplex semibaccata R.Br.	34.54	-3.02
Atriplex semibaccata R.Br.	29.6275	-10.0003
Atriplex semibaccata R.Br.	29.3642	-10.1872
Atriplex semibaccata R.Br.	29.3585	-10.1857
Atriplex semibaccata R.Br.	34.2529	-3.30683
Atriplex semibaccata R.Br.	31.5464	-7.6572
Atriplex semibaccata R.Br.	30.5331	-7.91111
Atriplex semibaccata R.Br.	30.5331	-7.91111
Atriplex semibaccata R.Br.	30.4906	-9.67139
Atriplex semibaccata R.Br.	29.8839	-9.5825
Atriplex semibaccata R.Br.	28.77	-9.43
Atriplex semibaccata R.Br.	34.9333	-2.71667
Atriplex semibaccata R.Br.	31.8	-8.5
Atriplex semibaccata R.Br.	30.4208	-9.59778
Atriplex semibaccata R.Br.	30.4208	-9.59778
Atriplex semibaccata R.Br.	34.7487	-1.93108
Atriplex semibaccata R.Br.	34.3087	-3.2811
Atriplex semibaccata R.Br.	34.8787	-2.8711
Atriplex semibaccata R.Br.	35.1187	-2.3211
Atriplex semibaccata R.Br.	34.8787	-2.8711
Atriplex semibaccata R.Br.	35.1187	-2.3411
Atriplex semibaccata R.Br.	34.4387	-3.35111
Atriplex semibaccata R.Br.	35.0587	-2.21109
Atriplex semibaccata R.Br.	35.11	-4.18103
Atriplex semibaccata R.Br.	29.5586	-10.2512
Atriplex semibaccata R.Br.	31.6294	-7.97213
Atriplex suberecta I.Verd.	30.9137	-6.85081
Atriplex suberecta I.Verd.	30.9114	-6.86061
Atriplex suberecta I.Verd.	30.8654	-6.84703
Atriplex suberecta I.Verd.	29.1748	-10.0929
Atriplex suberecta I.Verd.	28.9725	-10.0474
Atriplex suberecta I.Verd.	31.8841	-4.35595
Atriplex suberecta I.Verd.	35.2563	-2.92509
Atriplex suberecta I.Verd.	31.6352	-7.98279
Atriplex suberecta I.Verd.	28.5492	-9.34222
Atriplex suberecta I.Verd.	34.8743	-2.7095
Atriplex suberecta I.Verd.	34.7487	-1.93108
Aurelia aurita (Linnaeus, 1758)	31.3533	-9.79869
Azolla filiculoides Lam.	34.1397	-6.60052
Azolla filiculoides Lam.	33.6487	-7.11116
BOLD:AAA5223	28.6876	-8.81721
BOLD:AAA5223	28.6876	-8.81721
BOLD:AAA5223	28.6876	-8.81721
BOLD:AAA5223	28.6876	-8.81721
BOLD:AAA5223	28.6876	-8.81721
BOLD:AAA5578	33.6066	-7.633
BOLD:AAA5870	34.02	-6.82
BOLD:AAA5870	34.02	-6.82
BOLD:AAA5870	34.02	-6.82
BOLD:AAA8462	29.8997	-9.59401
BOLD:AAB1975	33.733	-6.729
BOLD:AAJ8033	29.0509	-9.93275
BOLD:AAN3534	34.465	-5.511
BOLD:AAW7259	28.6876	-8.81721
BOLD:AAW7259	28.6876	-8.81721
BOLD:AAW7259	28.6876	-8.81721
BOLD:AAW7259	28.6876	-8.81721
BOLD:AAW7259	28.6876	-8.81721
BOLD:AAW7259	28.6876	-8.81721
BOLD:AAW7259	28.6876	-8.81721
BOLD:AAW8077	28.6876	-8.81721
BOLD:AAW8077	28.6876	-8.81721
BOLD:AAW8077	28.6876	-8.81721
BOLD:AAW8077	28.6876	-8.81721
BOLD:AAW8077	28.6876	-8.81721
BOLD:AAW8077	28.6876	-8.81721
BOLD:AAW8077	28.6876	-8.81721
BOLD:AAW8077	28.6876	-8.81721
BOLD:AAW8077	28.6876	-8.81721
BOLD:AAW8077	28.6876	-8.81721
BOLD:AAW8077	28.6876	-8.81721
BOLD:AAW8077	28.6876	-8.81721
BOLD:AAW8077	28.6876	-8.81721
BOLD:AAW8077	28.6876	-8.81721
BOLD:AAW8077	28.6876	-8.81721
BOLD:ACQ1033	28.6876	-8.81721
Bassia indica (Wight) A.J.Scott	33.5561	-3.62606
Bassia indica (Wight) A.J.Scott	30.5052	-8.71884
Bassia scoparia (L.) A.J.Scott	34.4144	-2.91979
Bassia scoparia (L.) A.J.Scott	35.2208	-3.23561
Bassia scoparia (L.) A.J.Scott	35.7723	-5.79546
Bassia scoparia (L.) A.J.Scott	35.7723	-5.79546
Bassia scoparia (L.) A.J.Scott	35.7723	-5.79546
Bassia scoparia (L.) A.J.Scott	35.7723	-5.79546
Bassia scoparia (L.) A.J.Scott	30.2615	-5.68237
Bassia scoparia (L.) Voss	31.6199	-7.9792
Bassia scoparia subsp. densiflora (Turcz. ex Aellen) Cirujano & Velayos	34.7487	-1.93108
Bemisia tabaci (Gennadius, 1889)	28.6876	-8.81721
Bemisia tabaci (Gennadius, 1889)	28.6876	-8.81721
Bemisia tabaci (Gennadius, 1889)	28.6876	-8.81721
Bemisia tabaci (Gennadius, 1889)	28.6876	-8.81721
Bemisia tabaci (Gennadius, 1889)	28.6876	-8.81721
Bemisia tabaci (Gennadius, 1889)	28.6876	-8.81721
Bemisia tabaci (Gennadius, 1889)	28.6876	-8.81721
Bemisia tabaci (Gennadius, 1889)	28.6876	-8.81721
Bemisia tabaci (Gennadius, 1889)	28.6876	-8.81721
Bemisia tabaci (Gennadius, 1889)	28.6876	-8.81721
Bemisia tabaci (Gennadius, 1889)	28.6876	-8.81721
Bemisia tabaci (Gennadius, 1889)	28.6876	-8.81721
Bemisia tabaci (Gennadius, 1889)	28.6876	-8.81721
Bemisia tabaci (Gennadius, 1889)	28.6876	-8.81721
Bemisia tabaci (Gennadius, 1889)	28.6876	-8.81721
Bemisia tabaci (Gennadius, 1889)	28.6876	-8.81721
Bemisia tabaci (Gennadius, 1889)	28.6876	-8.81721
Bemisia tabaci (Gennadius, 1889)	28.6876	-8.81721
Bemisia tabaci (Gennadius, 1889)	28.6876	-8.81721
Bemisia tabaci (Gennadius, 1889)	28.6876	-8.81721
Bemisia tabaci (Gennadius, 1889)	28.6876	-8.81721
Bemisia tabaci (Gennadius, 1889)	28.6876	-8.81721
Bemisia tabaci (Gennadius, 1889)	28.6876	-8.81721
Bemisia tabaci (Gennadius, 1889)	28.6876	-8.81721
Bemisia tabaci (Gennadius, 1889)	28.6876	-8.81721
Bemisia tabaci (Gennadius, 1889)	28.6876	-8.81721
Bemisia tabaci (Gennadius, 1889)	28.6876	-8.81721
Bemisia tabaci (Gennadius, 1889)	28.6876	-8.81721
Bemisia tabaci (Gennadius, 1889)	28.6876	-8.81721
Bemisia tabaci (Gennadius, 1889)	28.6876	-8.81721
Bemisia tabaci (Gennadius, 1889)	28.6876	-8.81721
Bemisia tabaci (Gennadius, 1889)	28.6876	-8.81721
Bemisia tabaci (Gennadius, 1889)	28.6876	-8.81721
Bemisia tabaci (Gennadius, 1889)	28.6876	-8.81721
Bemisia tabaci (Gennadius, 1889)	28.6876	-8.81721
Bidens aurea (Aiton) Sherff	31.5244	-5.52703
Bidens aurea (Aiton) Sherff	35.1699	-5.25699
Bidens aurea (Aiton) Sherff	31.0399	-6.60186
Bidens aurea (Aiton) Sherff	31.0398	-6.60183
Bidens aurea (Aiton) Sherff	31.0399	-6.60199
Bidens aurea (Aiton) Sherff	31.5161	-5.4467
Bidens aurea (Aiton) Sherff	31.1541	-7.84116
Bidens aurea (Aiton) Sherff	31.1542	-7.84009
Bidens aurea (Aiton) Sherff	33.1905	-3.85107
Bidens aurea (Aiton) Sherff	35.9108	-5.38454
Bidens aurea (Aiton) Sherff	35.1697	-5.25731
Bidens aurea (Aiton) Sherff	35.4123	-5.135
Bidens aurea (Aiton) Sherff	35.4265	-5.11737
Bidens aurea (Aiton) Sherff	35.4287	-5.11115
Bidens aurea (Aiton) Sherff	35.4087	-5.13115
Bidens aurea (Aiton) Sherff	35.4087	-5.10115
Bidens aurea (Aiton) Sherff	35.2187	-5.37115
Bidens aurea (Aiton) Sherff	35.4333	-5.11667
Bidens aurea (Aiton) Sherff	35.4167	-5.13333
Bidens aurea (Aiton) Sherff	35.4167	-5.1
Bidens pilosa L.	35.7884	-5.84125
Bidens pilosa L.	35.2385	-5.18051
Bidens pilosa L.	33.9984	-6.85268
Bidens pilosa L.	35.42	-5.08
Bidens pilosa L.	35.38	-5.17
Bidens pilosa L.	35.3084	-4.97867
Bidens pilosa L.	35.27	-5.25
Bidens pilosa L.	35.4123	-5.135
Bidens pilosa L.	35.0728	-6.0912
Bidens pilosa L.	33.9987	-6.86116
Bidens pilosa L.	35.5387	-5.37116
Bidens pilosa L.	34.0087	-6.78116
Bidens pilosa L.	35.3787	-5.16115
Bidens pilosa L.	35.2787	-5.23115
Bidens pilosa L.	35.2987	-4.96115
Bidens pilosa L.	35.4087	-5.08115
Bidens pilosa L.	35.2587	-5.25115
Bidens pilosa L.	35.4087	-5.13115
Bidens pilosa L.	35.3	-4.96667
Bidens pilosa L.	35.4167	-5.13333
Bidens pilosa L.	35.2833	-5.23333
Bidens pilosa L.	35.4167	-5.08333
Bidens pilosa L.	35.3833	-5.16667
Bidens pilosa L.	35.2667	-5.25
Bidens pilosa L.	35.4333	-5.11667
Botrylloides niger Herdman, 1886	35.2086	-2.8703
Botrylloides niger Herdman, 1886	35.0999	-2.28766
Botrylloides niger Herdman, 1886	35.0999	-2.28766
Botrylloides niger Herdman, 1886	35.0999	-2.28766
Botrylloides niger Herdman, 1886	35.0999	-2.28766
Botrylloides niger Herdman, 1886	35.0999	-2.28766
Botrylloides niger Herdman, 1886	35.0999	-2.28766
Botrylloides niger Herdman, 1886	35.0999	-2.28766
Botrylloides niger Herdman, 1886	35.0888	-2.24071
Botrylloides niger Herdman, 1886	35.0888	-2.24071
Botrylloides niger Herdman, 1886	35.0888	-2.24071
Botrylloides niger Herdman, 1886	35.0888	-2.24071
Botrylloides niger Herdman, 1886	35.0888	-2.24071
Botrylloides niger Herdman, 1886	35.0888	-2.24071
Botrylloides niger Herdman, 1886	35.0888	-2.24071
Botrylloides niger Herdman, 1886	35.0888	-2.24071
Botrylloides niger Herdman, 1886	35.0888	-2.24071
Botrylloides niger Herdman, 1886	35.0888	-2.24071
Botrylloides niger Herdman, 1886	35.0888	-2.24071
Botrylloides niger Herdman, 1886	35.0888	-2.24071
Botrylloides niger Herdman, 1886	35.0888	-2.24071
Botrylloides niger Herdman, 1886	35.0888	-2.24071
Botrylloides niger Herdman, 1886	35.0888	-2.24071
Botrylloides niger Herdman, 1886	35.0888	-2.24071
Botrylloides niger Herdman, 1886	35.0888	-2.24071
Botrylloides niger Herdman, 1886	35.0888	-2.24071
Botrylloides niger Herdman, 1886	35.0888	-2.24071
Botrylloides niger Herdman, 1886	35.0999	-2.28766
Botrylloides niger Herdman, 1886	35.0999	-2.28766
Botrylloides niger Herdman, 1886	35.0999	-2.28766
Botrylloides niger Herdman, 1886	35.0999	-2.28766
Botrylloides niger Herdman, 1886	35.0999	-2.28766
Botrylloides niger Herdman, 1886	35.0999	-2.28766
Botrylloides niger Herdman, 1886	35.0999	-2.28766
Botrylloides niger Herdman, 1886	35.0999	-2.28766
Botrylloides niger Herdman, 1886	35.0999	-2.28766
Botrylloides niger Herdman, 1886	35.0999	-2.28766
Botrylloides niger Herdman, 1886	35.0999	-2.28766
Botrylloides niger Herdman, 1886	35.0999	-2.28766
Botrylloides niger Herdman, 1886	35.0999	-2.28766
Botrylloides niger Herdman, 1886	35.0999	-2.28766
Botrylloides niger Herdman, 1886	35.0999	-2.28766
Botrylloides niger Herdman, 1886	35.0999	-2.28766
Botrylloides niger Herdman, 1886	35.0999	-2.28766
Botrylloides niger Herdman, 1886	35.0999	-2.28766
Botrylloides niger Herdman, 1886	35.0999	-2.28766
Botrylloides niger Herdman, 1886	35.0999	-2.28766
Botrylloides niger Herdman, 1886	35.0999	-2.28766
Botrylloides niger Herdman, 1886	35.0999	-2.28766
Botrylloides niger Herdman, 1886	35.0999	-2.28766
Botrylloides niger Herdman, 1886	35.0999	-2.28766
Botrylloides niger Herdman, 1886	35.0999	-2.28766
Botrylloides niger Herdman, 1886	35.0999	-2.28766
Botrylloides niger Herdman, 1886	35.0999	-2.28766
Botrylloides niger Herdman, 1886	35.0999	-2.28766
Botrylloides niger Herdman, 1886	35.0999	-2.28766
Botrylloides niger Herdman, 1886	35.0999	-2.28766
Botrylloides niger Herdman, 1886	35.0999	-2.28766
Botrylloides niger Herdman, 1886	35.0999	-2.28766
Botrylloides niger Herdman, 1886	35.0999	-2.28766
Botrylloides niger Herdman, 1886	35.0999	-2.28766
Botrylloides niger Herdman, 1886	35.0999	-2.28766
Botrylloides niger Herdman, 1886	35.0999	-2.28766
Botrylloides niger Herdman, 1886	35.0999	-2.28766
Botrylloides niger Herdman, 1886	35.0999	-2.28766
Botrylloides niger Herdman, 1886	35.0999	-2.28766
Botrylloides niger Herdman, 1886	35.0999	-2.28766
Botrylloides niger Herdman, 1886	35.0999	-2.28766
Botrylloides niger Herdman, 1886	35.0999	-2.28766
Botrylloides niger Herdman, 1886	35.0999	-2.28766
Botrylloides niger Herdman, 1886	35.0999	-2.28766
Botrylloides niger Herdman, 1886	35.0999	-2.28766
Botrylloides niger Herdman, 1886	35.0999	-2.28766
Botrylloides niger Herdman, 1886	35.0999	-2.28766
Botrylloides niger Herdman, 1886	35.0999	-2.28766
Botrylloides niger Herdman, 1886	35.0999	-2.28766
Botrylloides niger Herdman, 1886	35.0999	-2.28766
Botrylloides niger Herdman, 1886	35.0999	-2.28766
Botrylloides niger Herdman, 1886	35.0999	-2.28766
Botrylloides niger Herdman, 1886	35.0999	-2.28766
Botrylloides niger Herdman, 1886	35.0999	-2.28766
Botrylloides niger Herdman, 1886	35.0999	-2.28766
Botrylloides niger Herdman, 1886	35.0999	-2.28766
Botrylloides niger Herdman, 1886	35.0999	-2.28766
Botrylloides niger Herdman, 1886	35.0999	-2.28766
Botrylloides niger Herdman, 1886	35.0999	-2.28766
Botrylloides niger Herdman, 1886	35.0999	-2.28766
Botrylloides niger Herdman, 1886	35.0999	-2.28766
Botrylloides niger Herdman, 1886	35.0999	-2.28766
Botrylloides niger Herdman, 1886	35.0999	-2.28766
Botrylloides niger Herdman, 1886	35.0999	-2.28766
Botrylloides niger Herdman, 1886	35.0999	-2.28766
Botrylloides niger Herdman, 1886	35.0999	-2.28766
Botrylloides niger Herdman, 1886	35.0999	-2.28766
Botrylloides niger Herdman, 1886	35.0999	-2.28766
Botrylloides niger Herdman, 1886	35.0999	-2.28766
Botrylloides niger Herdman, 1886	35.0999	-2.28766
Botrylloides niger Herdman, 1886	35.0999	-2.28766
Botrylloides niger Herdman, 1886	35.0999	-2.28766
Botrylloides niger Herdman, 1886	35.0999	-2.28766
Botrylloides niger Herdman, 1886	35.0999	-2.28766
Botrylloides niger Herdman, 1886	35.0977	-2.28952
Botrylloides niger Herdman, 1886	35.0999	-2.28766
Botrylloides niger Herdman, 1886	35.0999	-2.28766
Botrylloides niger Herdman, 1886	35.0999	-2.28766
Botrylloides niger Herdman, 1886	35.0999	-2.28766
Botrylloides niger Herdman, 1886	35.0999	-2.28766
Botrylloides niger Herdman, 1886	35.0999	-2.28766
Botrylloides niger Herdman, 1886	35.0999	-2.28766
Botrylloides niger Herdman, 1886	35.0999	-2.28766
Botrylloides niger Herdman, 1886	35.0999	-2.28766
Botrylloides niger Herdman, 1886	35.0999	-2.28766
Botrylloides niger Herdman, 1886	35.0999	-2.28766
Botrylloides niger Herdman, 1886	35.0999	-2.28766
Botrylloides niger Herdman, 1886	35.0999	-2.28766
Botrylloides niger Herdman, 1886	35.0999	-2.28766
Botrylloides niger Herdman, 1886	35.0999	-2.28766
Botrylloides niger Herdman, 1886	35.0999	-2.28766
Botrylloides niger Herdman, 1886	35.0999	-2.28766
Botrylloides niger Herdman, 1886	35.0999	-2.28766
Botrylloides niger Herdman, 1886	35.0999	-2.28766
Botrylloides niger Herdman, 1886	35.0999	-2.28766
Botrylloides niger Herdman, 1886	35.0999	-2.28766
Botrylloides niger Herdman, 1886	35.0999	-2.28766
Botrylloides niger Herdman, 1886	35.0999	-2.28766
Botrylloides niger Herdman, 1886	35.0999	-2.28766
Botrylloides niger Herdman, 1886	35.0999	-2.28766
Botrylloides niger Herdman, 1886	35.0999	-2.28766
Botrylloides niger Herdman, 1886	35.0999	-2.28766
Botrylloides niger Herdman, 1886	35.0999	-2.28766
Botrylloides niger Herdman, 1886	35.0999	-2.28766
Botrylloides niger Herdman, 1886	35.0999	-2.28766
Botrylloides niger Herdman, 1886	35.0999	-2.28766
Botrylloides niger Herdman, 1886	35.0999	-2.28766
Botrylloides niger Herdman, 1886	35.0999	-2.28766
Botrylloides niger Herdman, 1886	35.0999	-2.28766
Botrylloides niger Herdman, 1886	35.0999	-2.28766
Botrylloides niger Herdman, 1886	35.0999	-2.28766
Botrylloides niger Herdman, 1886	35.0999	-2.28766
Botrylloides niger Herdman, 1886	35.0999	-2.28766
Botrylloides niger Herdman, 1886	35.0999	-2.28766
Botrylloides niger Herdman, 1886	35.0999	-2.28766
Botrylloides niger Herdman, 1886	35.0999	-2.28766
Botrylloides niger Herdman, 1886	35.0999	-2.28766
Botrylloides niger Herdman, 1886	35.0999	-2.28766
Botrylloides niger Herdman, 1886	35.0999	-2.28766
Botrylloides niger Herdman, 1886	35.0999	-2.28766
Botrylloides niger Herdman, 1886	35.0999	-2.28766
Botrylloides niger Herdman, 1886	35.0999	-2.28766
Botrylloides niger Herdman, 1886	35.0999	-2.28766
Botrylloides niger Herdman, 1886	35.0999	-2.28766
Botrylloides niger Herdman, 1886	35.0999	-2.28766
Botrylloides niger Herdman, 1886	35.0999	-2.28766
Botrylloides niger Herdman, 1886	35.0999	-2.28766
Botrylloides niger Herdman, 1886	35.0999	-2.28766
Botrylloides niger Herdman, 1886	35.0999	-2.28766
Botrylloides niger Herdman, 1886	35.0999	-2.28766
Botrylloides niger Herdman, 1886	35.0999	-2.28766
Botrylloides niger Herdman, 1886	35.0999	-2.28766
Botrylloides niger Herdman, 1886	35.0999	-2.28766
Botrylloides niger Herdman, 1886	35.0999	-2.28766
Branchiomma luctuosum (Grube, 1870)	35.0999	-2.28766
Branchiomma luctuosum (Grube, 1870)	35.0999	-2.28766
Branchiomma luctuosum (Grube, 1870)	35.0999	-2.28766
Branchiomma luctuosum (Grube, 1870)	35.0999	-2.28766
Branchiomma luctuosum (Grube, 1870)	35.0999	-2.28766
Branchiomma luctuosum (Grube, 1870)	35.0999	-2.28766
Branchiomma luctuosum (Grube, 1870)	35.0888	-2.24071
Branchiomma luctuosum (Grube, 1870)	35.0888	-2.24071
Branchiomma luctuosum (Grube, 1870)	35.0888	-2.24071
Branchiomma luctuosum (Grube, 1870)	35.0888	-2.24071
Branchiomma luctuosum (Grube, 1870)	35.0888	-2.24071
Branchiomma luctuosum (Grube, 1870)	35.0888	-2.24071
Branchiomma luctuosum (Grube, 1870)	35.0888	-2.24071
Branchiomma luctuosum (Grube, 1870)	35.1022	-2.29844
Branchiomma luctuosum (Grube, 1870)	34.0338	-6.83744
Branchiomma luctuosum (Grube, 1870)	35.0999	-2.28766
Branchiomma luctuosum (Grube, 1870)	35.0999	-2.28766
Branchiomma luctuosum (Grube, 1870)	35.0999	-2.28766
Branchiomma luctuosum (Grube, 1870)	35.0999	-2.28766
Branchiomma luctuosum (Grube, 1870)	35.0999	-2.28766
Branchiomma luctuosum (Grube, 1870)	35.0999	-2.28766
Branchiomma luctuosum (Grube, 1870)	35.0999	-2.28766
Branchiomma luctuosum (Grube, 1870)	35.0999	-2.28766
Branchiomma luctuosum (Grube, 1870)	35.0999	-2.28766
Branchiomma luctuosum (Grube, 1870)	35.0999	-2.28766
Branchiomma luctuosum (Grube, 1870)	35.0999	-2.28766
Branchiomma luctuosum (Grube, 1870)	35.0999	-2.28766
Branchiomma luctuosum (Grube, 1870)	35.0999	-2.28766
Branchiomma luctuosum (Grube, 1870)	35.0999	-2.28766
Branchiomma luctuosum (Grube, 1870)	35.0999	-2.28766
Branchiomma luctuosum (Grube, 1870)	35.0999	-2.28766
Branchiomma luctuosum (Grube, 1870)	35.0999	-2.28766
Branchiomma luctuosum (Grube, 1870)	35.0999	-2.28766
Branchiomma luctuosum (Grube, 1870)	35.0999	-2.28766
Branchiomma luctuosum (Grube, 1870)	35.0999	-2.28766
Branchiomma luctuosum (Grube, 1870)	35.0999	-2.28766
Branchiomma luctuosum (Grube, 1870)	35.0999	-2.28766
Branchiomma luctuosum (Grube, 1870)	35.0999	-2.28766
Branchiomma luctuosum (Grube, 1870)	35.0999	-2.28766
Branchiomma luctuosum (Grube, 1870)	35.0999	-2.28766
Branchiomma luctuosum (Grube, 1870)	35.0999	-2.28766
Branchiomma luctuosum (Grube, 1870)	35.0999	-2.28766
Branchiomma luctuosum (Grube, 1870)	35.0999	-2.28766
Branchiomma luctuosum (Grube, 1870)	35.0999	-2.28766
Branchiomma luctuosum (Grube, 1870)	35.0999	-2.28766
Branchiomma luctuosum (Grube, 1870)	35.0999	-2.28766
Branchiomma luctuosum (Grube, 1870)	35.0999	-2.28766
Branchiomma luctuosum (Grube, 1870)	35.0999	-2.28766
Branchiomma luctuosum (Grube, 1870)	35.0999	-2.28766
Branchiomma luctuosum (Grube, 1870)	35.0999	-2.28766
Branchiomma luctuosum (Grube, 1870)	35.0999	-2.28766
Branchiomma luctuosum (Grube, 1870)	35.0999	-2.28766
Branchiomma luctuosum (Grube, 1870)	35.0999	-2.28766
Branchiomma luctuosum (Grube, 1870)	35.0999	-2.28766
Branchiomma luctuosum (Grube, 1870)	35.0999	-2.28766
Branchiomma luctuosum (Grube, 1870)	35.0999	-2.28766
Branchiomma luctuosum (Grube, 1870)	35.0999	-2.28766
Branchiomma luctuosum (Grube, 1870)	35.0999	-2.28766
Branchiomma luctuosum (Grube, 1870)	35.0999	-2.28766
Branchiomma luctuosum (Grube, 1870)	35.0999	-2.28766
Branchiomma luctuosum (Grube, 1870)	35.0999	-2.28766
Branchiomma luctuosum (Grube, 1870)	35.0999	-2.28766
Branchiomma luctuosum (Grube, 1870)	35.0999	-2.28766
Bromus catharticus Vahl	33.5922	-7.62449
Bromus catharticus Vahl	35.7869	-5.81529
Bromus catharticus Vahl	35.787	-5.81527
Bromus catharticus Vahl	33.5903	-7.59261
Bromus catharticus Vahl	32.7909	-8.96124
Bromus catharticus Vahl	35.4287	-5.08115
Bromus catharticus Vahl	35.4333	-5.08333
Bromus willdenowii Kunth	35.43	-5.08
Calendula officinalis L.	34.0727	-5.55306
Calendula officinalis L.	33.5451	-7.76075
Calendula officinalis L.	33.524	-7.82592
Calendula officinalis L.	33.5505	-7.74663
Calendula officinalis L.	34.0729	-5.55449
Calendula officinalis L.	34.0253	-4.99878
Calendula officinalis L.	34.0729	-5.55449
Calendula officinalis L.	35.4384	-5.10733
Calendula officinalis L.	33.8473	-5.99464
Calendula officinalis L.	34.8395	-2.35849
Calendula officinalis L.	34.0303	-4.80088
Calendula officinalis L.	35.4333	-5.1
Callinectes sapidus Rathbun, 1896	33.2683	-8.39144
Callinectes sapidus Rathbun, 1896	35.1238	-2.3418
Callinectes sapidus Rathbun, 1896	35.1175	-2.72219
Callinectes sapidus Rathbun, 1896	35.2516	-2.9279
Callinectes sapidus Rathbun, 1896	35.2086	-2.8703
Callinectes sapidus Rathbun, 1896	30.0627	-9.66261
Callinectes sapidus Rathbun, 1896	29.1616	-10.2668
Callinectes sapidus Rathbun, 1896	28.9628	-10.6108
Callinectes sapidus Rathbun, 1896	35.2029	-3.17165
Callinectes sapidus Rathbun, 1896	34.0382	-5.53155
Callinectes sapidus Rathbun, 1896	30.0649	-9.6642
Callinectes sapidus Rathbun, 1896	35.7806	-5.79845
Callinectes sapidus Rathbun, 1896	35.7806	-5.79842
Callinectes sapidus Rathbun, 1896	35.7806	-5.79845
Callinectes sapidus Rathbun, 1896	35.7807	-5.79847
Callinectes sapidus Rathbun, 1896	28.963	-10.6124
Callinectes sapidus Rathbun, 1896	28.9618	-10.614
Callinectes sapidus Rathbun, 1896	28.9383	-10.5945
Callinectes sapidus Rathbun, 1896	35.1094	-2.36235
Callinectes sapidus Rathbun, 1896	35.1089	-2.36369
Callinectes sapidus Rathbun, 1896	35.1094	-2.36139
Callinectes sapidus Rathbun, 1896	34.0338	-6.83744
Callinectes sapidus Rathbun, 1896	35.0999	-2.28766
Callinectes sapidus Rathbun, 1896	35.0999	-2.28766
Callinectes sapidus Rathbun, 1896	35.0999	-2.28766
Callinectes sapidus Rathbun, 1896	35.0999	-2.28766
Callinectes sapidus Rathbun, 1896	35.0999	-2.28766
Callinectes sapidus Rathbun, 1896	35.0999	-2.28766
Callinectes sapidus Rathbun, 1896	35.0999	-2.28766
Callinectes sapidus Rathbun, 1896	35.0999	-2.28766
Callinectes sapidus Rathbun, 1896	35.0999	-2.28766
Callinectes sapidus Rathbun, 1896	33.3167	-8.33657
Callinectes sapidus Rathbun, 1896	35.16	-2.86
Carassius auratus (Linnaeus, 1758)	31.6402	-8.0034
Carassius auratus (Linnaeus, 1758)	34.682	-1.90016
Carassius auratus (Linnaeus, 1758)	34.0405	-5.06065
Carassius auratus (Linnaeus, 1758)	31.6418	-8.00295
Cardiocondyla emeryi Forel, 1881	30.4333	-96
Carpobrotus acinaciformis (L.) L.Bolus	32.0132	-6.71926
Carpobrotus acinaciformis (L.) L.Bolus	34.3876	-2.90225
Carpobrotus acinaciformis (L.) L.Bolus	31.7895	-7.03959
Carpobrotus acinaciformis (L.) L.Bolus	35.2055	-6.14778
Carpobrotus acinaciformis (L.) L.Bolus	33.608	-7.6498
Carpobrotus acinaciformis (L.) L.Bolus	31.0468	-7.13036
Carpobrotus acinaciformis (L.) L.Bolus	31.8646	-6.93752
Carpobrotus acinaciformis (L.) L.Bolus	32.2718	-7.96889
Carpobrotus acinaciformis (L.) L.Bolus	30.5121	-9.68734
Carpobrotus acinaciformis (L.) L.Bolus	34.0315	-6.83883
Carpobrotus acinaciformis (L.) L.Bolus	33.9546	-6.89359
Carpobrotus acinaciformis (L.) L.Bolus	30.5497	-9.73236
Carpobrotus acinaciformis (L.) L.Bolus	33.5996	-7.66593
Carpobrotus acinaciformis (L.) L.Bolus	33.5874	-7.68543
Carpobrotus acinaciformis (L.) L.Bolus	33.5996	-7.66596
Carpobrotus acinaciformis (L.) L.Bolus	35.783	-5.93058
Carpobrotus acinaciformis (L.) L.Bolus	30.1215	-9.65416
Carpobrotus acinaciformis (L.) L.Bolus	35.1479	-4.36619
Carpobrotus acinaciformis (L.) L.Bolus	33.9824	-6.84534
Carpobrotus acinaciformis (L.) L.Bolus	33.6097	-7.62646
Carpobrotus acinaciformis (L.) L.Bolus	33.4079	-7.54462
Carpobrotus acinaciformis (L.) L.Bolus	33.582	-7.70144
Carpobrotus acinaciformis (L.) L.Bolus	29.4797	-10.1282
Carpobrotus acinaciformis (L.) L.Bolus	33.609	-7.62748
Carpobrotus acinaciformis (L.) L.Bolus	33.609	-7.62742
Carpobrotus acinaciformis (L.) L.Bolus	30.5153	-9.67805
Carpobrotus acinaciformis (L.) L.Bolus	33.2829	-8.38754
Carpobrotus acinaciformis (L.) L.Bolus	33.9707	-6.90923
Carpobrotus acinaciformis (L.) L.Bolus	29.7504	-8.9599
Carpobrotus acinaciformis (L.) L.Bolus	33.565	-7.65556
Carpobrotus acinaciformis (L.) L.Bolus	33.6635	-7.39511
Carpobrotus acinaciformis (L.) L.Bolus	35.8072	-5.35137
Carpobrotus acinaciformis (L.) L.Bolus	31.6756	-7.96737
Carpobrotus acinaciformis (L.) L.Bolus	30.9108	-9.07089
Carpobrotus acinaciformis (L.) L.Bolus	31.2409	-8.25857
Carpobrotus acinaciformis (L.) L.Bolus	33.4937	-7.90566
Carpobrotus acinaciformis (L.) L.Bolus	33.5429	-7.76405
Carpobrotus acinaciformis (L.) L.Bolus	31.4958	-9.75738
Carpobrotus acinaciformis (L.) L.Bolus	33.3117	-8.34865
Carpobrotus acinaciformis (L.) L.Bolus	34.6445	-6.40617
Carpobrotus acinaciformis (L.) L.Bolus	34.0316	-6.83556
Carpobrotus acinaciformis (L.) L.Bolus	31.7893	-7.03985
Carpobrotus acinaciformis (L.) L.Bolus	33.9687	-6.82509
Carpobrotus acinaciformis (L.) L.Bolus	33.8174	-6.10464
Carpobrotus acinaciformis (L.) L.Bolus	33.5564	-7.62737
Carpobrotus acinaciformis (L.) L.Bolus	33.8231	-7.14149
Catocala nymphagoga Esper, 1787	34.2239	-4.00667
Catocala nymphagoga Esper, 1787	34.2239	-4.00667
Catocala nymphagoga Esper, 1787	31.2	-7.86667
Cenchrus clandestinus (Hochst. ex Chiov.) Morrone	30.2025	-9.18751
Cenchrus clandestinus (Hochst. ex Chiov.) Morrone	31.3662	-7.94721
Cenchrus clandestinus (Hochst. ex Chiov.) Morrone	34.0311	-6.84333
Cenchrus clandestinus (Hochst. ex Chiov.) Morrone	33.6053	-7.63534
Cenchrus clandestinus (Hochst. ex Chiov.) Morrone	34.8065	-2.41193
Cenchrus clandestinus (Hochst. ex Chiov.) Morrone	34.0307	-6.83711
Cenchrus clandestinus (Hochst. ex Chiov.) Morrone	32.6749	-8.9153
Cenchrus longisetus M.C.Johnst.	31.5065	-9.76439
Cenchrus longisetus M.C.Johnst.	30.3896	-9.59456
Cenchrus longisetus M.C.Johnst.	31.4969	-9.76306
Ceratitis capitata (Wiedemann, 1824)	31.3855	-9.59569
Ceratitis capitata (Wiedemann, 1824)	31.6804	-9.37488
Ceratitis capitata (Wiedemann, 1824)	31.4308	-9.71323
Ceratitis capitata (Wiedemann, 1824)	30.5608	-8.56205
Ceratitis capitata (Wiedemann, 1824)	33.5747	-7.6226
Ceratitis capitata (Wiedemann, 1824)	33.5747	-7.6226
Ceratitis capitata (Wiedemann, 1824)	33.5747	-7.6226
Ceratitis capitata (Wiedemann, 1824)	30.4	-9.6
Ceratitis capitata (Wiedemann, 1824)	30.35	-9.53333
Ceratitis capitata (Wiedemann, 1824)	31.51	-9.77
Ceratitis capitata (Wiedemann, 1824)	31.51	-9.77
Ceratitis capitata (Wiedemann, 1824)	31.18	-9.63
Ceratitis capitata (Wiedemann, 1824)	31.18	-9.63
Ceratitis capitata (Wiedemann, 1824)	33	-7.61667
Chenopodium bonus-henricus L.	31.18	-7.85
Chenopodium bonus-henricus L.	31.1906	-7.8519
Chenopodium giganteum D.Don	33.5865	-7.62331
Chenopodium giganteum D.Don	31.3137	-7.96001
Chenopodium giganteum D.Don	33.528	-7.81773
Chenopodium giganteum D.Don	33.5253	-7.80559
Chenopodium giganteum D.Don	35.4624	-5.7882
Chenopodium giganteum D.Don	33.6095	-7.62703
Chenopodium giganteum D.Don	31.2898	-7.96173
Chenopodium giganteum D.Don	31.2892	-7.96138
Chenopodium giganteum D.Don	33.3059	-8.1344
Chenopodium giganteum D.Don	33.9956	-3.27961
Chenopodium giganteum D.Don	29.9714	-9.64
Chenopodium giganteum D.Don	35.2077	-4.66739
Chenopodium giganteum D.Don	35.2077	-4.66739
Chenopodium multifidum L.	35.1715	-4.98546
Chenopodium multifidum L.	35.1715	-4.98546
Chenopodium multifidum L.	35.23	-2.96
Chenopodium multifidum L.	35.23	-2.96
Chenopodium multifidum L.	35.23	-2.96
Chenopodium multifidum L.	34.9373	-4.3085
Chenopodium multifidum L.	34.93	-4.32
Chenopodium multifidum L.	35.2487	-5.28115
Chenopodium multifidum L.	35.1587	-4.98115
Chenopodium multifidum L.	35.1587	-4.98115
Chenopodium multifidum L.	35.2687	-5.25115
Chenopodium multifidum L.	35.2487	-5.28115
Chloris gayana Kunth	30.4503	-8.8708
Chloris gayana Kunth	34.8787	-2.5611
Colocasia esculenta (L.) Schott	30.3889	-9.48351
Colocasia esculenta (L.) Schott	30.3888	-9.48355
Colocasia esculenta (L.) Schott	30.3889	-9.48355
Colocasia esculenta (L.) Schott	34.0059	-6.82033
Colocasia esculenta (L.) Schott	35.7802	-5.86415
Colocasia esculenta (L.) Schott	33.913	-5.57131
Colocasia esculenta (L.) Schott	34.0055	-6.82067
Colocasia esculenta (L.) Schott	34.0067	-6.81973
Colocasia esculenta (L.) Schott	34.0963	-6.76889
Colocasia esculenta (L.) Schott	33.9889	-6.79874
Conyza bonariensis (L.) Cronquist	34.0582	-6.79333
Conyza bonariensis (L.) Cronquist	35.2	-6.13
Conyza bonariensis (L.) Cronquist	35.1667	-4.3
Conyza bonariensis (L.) Cronquist	35.2069	-4.6675
Conyza bonariensis (L.) Cronquist	35.2069	-4.6675
Conyza bonariensis (L.) Cronquist	35.2069	-4.6675
Conyza bonariensis (L.) Cronquist	35.2069	-4.6675
Conyza bonariensis (L.) Cronquist	35.2069	-4.6675
Conyza bonariensis (L.) Cronquist	33.9717	-6.84861
Conyza bonariensis (L.) Cronquist	30.4333	-9.01667
Conyza bonariensis (L.) Cronquist	30.4333	-9.01667
Conyza bonariensis (L.) Cronquist	30.4333	-9.01667
Conyza bonariensis (L.) Cronquist	30.4333	-9.01667
Conyza bonariensis (L.) Cronquist	35.17	-6.17
Conyza bonariensis (L.) Cronquist	35.19	-6.15
Conyza bonariensis (L.) Cronquist	35.4	-5.16667
Conyza bonariensis (L.) Cronquist	35.1	-5.26667
Conyza bonariensis (L.) Cronquist	35.3833	-5.16667
Conyza bonariensis (L.) Cronquist	35.0333	-4.15
Conyza bonariensis (L.) Cronquist	35.3167	-2.98333
Conyza canadensis (L.) Cronquist	34.0708	-5.53642
Conyza canadensis (L.) Cronquist	35.0728	-6.0912
Corbicula fluminea (O.F.Müller, 1774)	30.9462	-6.78909
Corbicula fluminea (O.F.Müller, 1774)	34.0648	-5.32511
Corbicula fluminea (O.F.Müller, 1774)	35.0515	-2.42821
Corbicula fluminea (O.F.Müller, 1774)	34.1504	-4.4248
Corbicula fluminea (O.F.Müller, 1774)	34.1404	-4.41699
Corbicula fluminea (O.F.Müller, 1774)	32.8586	-8.0422
Coriandrum sativum L.	31.6227	-8.00718
Coriandrum sativum L.	31.0928	-4.01767
Coriandrum sativum L.	31.1399	-4.02072
Coriandrum sativum L.	30.257	-5.67587
Coriandrum sativum L.	33.5944	-7.63458
Coriandrum sativum L.	35.1189	-3.33291
Coriandrum sativum L.	30.9213	-6.9109
Coriandrum sativum L.	33.4741	-7.64838
Coriandrum sativum L.	30.0927	-8.46157
Coriandrum sativum L.	33.8728	-5.58276
Coriandrum sativum L.	34.411	-3.97803
Coriandrum sativum L.	31.5767	-5.58506
Coriandrum sativum L.	33.7135	-7.34709
Coriandrum sativum L.	33.5524	-7.37276
Coriandrum sativum L.	33.7804	-6.86617
Coriandrum sativum L.	30.9214	-6.90951
Coriandrum sativum L.	35.8202	-5.7241
Coriandrum sativum L.	34.2338	-3.34955
Coriandrum sativum L.	34.0254	-4.88309
Coriandrum sativum L.	28.9411	-9.95306
Coriandrum sativum L.	28.941	-9.95319
Coriandrum sativum L.	34.9938	-2.33051
Coriandrum sativum L.	31.6567	-8.08111
Coriandrum sativum L.	34.6	-3.46
Coriandrum sativum L.	35.17	-5.27
Coriandrum sativum L.	34.7866	-5.37842
Coriandrum sativum L.	0	0
Coriandrum sativum L.	30.68	-8.85
Coriandrum sativum L.	34.1083	-4.0067
Coriandrum sativum L.	34.1477	-4.01067
Coriandrum sativum L.	34.02	-4.62
Coriandrum sativum L.	32.3833	-8.633
Coriandrum sativum L.	32.1053	-9.08361
Coriandrum sativum L.	35.6281	-5.28611
Coriandrum sativum L.	33.5667	-7.66667
Coriandrum sativum L.	35.0018	-3.7232
Coriandrum sativum L.	35.32	-2.98
Coriandrum sativum L.	35.5667	-5.3667
Coriandrum sativum L.	34.0167	-4.61667
Coriandrum sativum L.	34.15	-4.01667
Coriandrum sativum L.	35.1587	-5.26115
Coriandrum sativum L.	35.1587	-5.26115
Coriandrum sativum L.	35.1667	-5.26667
Coriandrum sativum L.	35.7667	-5.9167
Coriandrum sativum L.	30.8833	-9.7
Coriandrum sativum L.	31.6667	-7.15
Coriandrum sativum L.	31.5	-7.5
Cortaderia selloana (Schult. & Schult.f.) Asch. & Graebn.	33.952	-6.89743
Cortaderia selloana (Schult. & Schult.f.) Asch. & Graebn.	34.6155	-2.44028
Cortaderia selloana (Schult. & Schult.f.) Asch. & Graebn.	34.0581	-4.98615
Cortaderia selloana (Schult. & Schult.f.) Asch. & Graebn.	35.3881	-6.06724
Cortaderia selloana (Schult. & Schult.f.) Asch. & Graebn.	33.9293	-6.82656
Cortaderia selloana (Schult. & Schult.f.) Asch. & Graebn.	33.4794	-7.61867
Cortaderia selloana (Schult. & Schult.f.) Asch. & Graebn.	33.9556	-6.89417
Cortaderia selloana (Schult. & Schult.f.) Asch. & Graebn.	33.4836	-7.62938
Cortaderia selloana (Schult. & Schult.f.) Asch. & Graebn.	35.7854	-5.84633
Cortaderia selloana (Schult. & Schult.f.) Asch. & Graebn.	33.9645	-6.84778
Cortaderia selloana (Schult. & Schult.f.) Asch. & Graebn.	31.6024	-8.00622
Corvus splendens Vieillot, 1817	35.79	-5.80333
Cotula coronopifolia L.	33.53	-6.95
Cotula coronopifolia L.	34.8742	-6.2542
Cotula coronopifolia L.	34.01	-6.7
Cotula coronopifolia L.	34.01	-6.7
Cotula coronopifolia L.	35.8	-5.35
Cotula coronopifolia L.	35.42	-5.12
Cotula coronopifolia L.	35.83	-5.35
Cotula coronopifolia L.	35.6281	-5.28611
Cotula coronopifolia L.	35.6281	-5.28611
Cotula coronopifolia L.	35.6281	-5.28611
Cotula coronopifolia L.	35.6281	-5.28611
Cotula coronopifolia L.	35.6281	-5.28611
Cotula coronopifolia L.	35.6281	-5.28611
Cotula coronopifolia L.	35.6281	-5.28611
Cotula coronopifolia L.	35.6281	-5.28611
Cotula coronopifolia L.	35.6281	-5.28611
Cotula coronopifolia L.	35.7417	-5.3715
Cotula coronopifolia L.	35.69	-5.62
Cotula coronopifolia L.	35.7888	-5.5022
Cotula coronopifolia L.	35.6765	-5.3238
Cotula coronopifolia L.	35.5597	-5.3667
Cotula coronopifolia L.	35.8087	-5.38116
Cotula coronopifolia L.	35.4087	-5.11115
Cotula coronopifolia L.	35.4087	-5.11115
Cotula coronopifolia L.	35.7987	-5.71117
Cotula coronopifolia L.	35.7187	-5.38116
Cotula coronopifolia L.	35.7187	-5.38116
Cotula coronopifolia L.	35.5587	-6.08117
Cotula coronopifolia L.	35.7187	-5.27116
Cotula coronopifolia L.	34.7187	-6.25116
Cotula coronopifolia L.	35.5387	-5.37116
Cotula coronopifolia L.	35.4167	-5.11667
Cotula coronopifolia L.	35.4167	-5.11667
Cotula coronopifolia L.	35.8	-5.35
Cotula coronopifolia L.	34.7167	-6.25
Crepidula fornicata (Linnaeus, 1758)	30.5035	-9.68524
Cutleria multifida (Turner) Grev.	35.7672	-5.79972
Cyanus segetum Hill	33.0023	-5.0703
Cydia pomonella (Linnaeus, 1758)	31.3069	-7.73701
Cydia pomonella (Linnaeus, 1758)	31.205	-7.85861
Cyperus difformis L.	35.171	-6.0896
Cyprinus carpio Linnaeus, 1758	33.1032	-7.33963
Cyprinus carpio Linnaeus, 1758	33.1036	-7.3398
Cyprinus carpio Linnaeus, 1758	34.5673	-5.95463
Cyprinus carpio Linnaeus, 1758	30.432	-5.91669
Dactylopius opuntiae (Cockerell, 1896)	35.8146	-5.72536
Dactylopius opuntiae (Cockerell, 1896)	30.3921	-8.69884
Dactylopius opuntiae (Cockerell, 1896)	34.0729	-5.55493
Digitaria paspalodes Michx.	31.11	-8.1
Dysphania multifida (L.) Mosyakin & Clemants	0	0
Eclipta prostrata (L.) L.	35.42	-5.1
Eclipta prostrata (L.) L.	35.68	-5.33
Eclipta prostrata (L.) L.	35.2156	-6.12793
Eclipta prostrata (L.) L.	34.48	-6.37
Eclipta prostrata (L.) L.	35.2167	-6.13333
Eclipta prostrata (L.) L.	35.4087	-5.10115
Eclipta prostrata (L.) L.	35.1987	-5.31115
Eclipta prostrata (L.) L.	35.6833	-5.33333
Eclipta prostrata (L.) L.	34.4833	-6.36667
Eclipta prostrata (L.) L.	35.4167	-5.1
Eclipta prostrata (L.) L.	35.2167	-6.13333
Ehrharta erecta Lam.	35.7795	-5.81796
Ehrharta erecta Lam.	35.7886	-5.8395
Ehrharta erecta Lam.	34.0044	-6.855
Ehrharta erecta Lam.	34.0044	-6.855
Ehrharta erecta Lam.	33.9987	-6.86116
Ehrharta erecta var. erecta	34	-6.85
Ehrharta erecta var. erecta	34.0027	-6.853
Ehrharta erecta var. erecta	34.0044	-6.855
Ehrharta erecta var. erecta	34	-6.85
Eleusine indica (L.) Gaertn.	33.6046	-7.62124
Eleusine indica (L.) Gaertn.	33.5943	-7.5869
Eleusine indica (L.) Gaertn.	33.592	-7.58977
Eleusine indica (L.) Gaertn.	31.4464	-9.6505
Eleusine indica (L.) Gaertn.	29.9986	-9.58889
Eleusine indica (L.) Gaertn.	32.791	-8.96179
Eleusine indica (L.) Gaertn.	33.9987	-6.86116
Eleusine indica (L.) Gaertn.	34.3587	-6.17116
Eleusine indica (L.) Gaertn.	35.0887	-5.14115
Eleusine indica (L.) Gaertn.	35.0887	-5.25115
Enneadesmus forficula (Fairmaire, 1883)	24.6552	-13.7944
Erigeron bonariensis L.	31.5666	-5.58076
Erigeron bonariensis L.	33.8932	-5.5639
Erigeron bonariensis L.	33.3727	-7.56651
Erigeron bonariensis L.	31.6358	-8.01691
Erigeron bonariensis L.	33.2233	-7.57304
Erigeron bonariensis L.	33.256	-8.50092
Erigeron bonariensis L.	33.256	-8.50092
Erigeron bonariensis L.	35.5686	-5.36933
Erigeron bonariensis L.	34.2412	-6.671
Erigeron bonariensis L.	31.0441	-5.79115
Erigeron bonariensis L.	33.5627	-7.63961
Erigeron bonariensis L.	33.5629	-7.63963
Erigeron bonariensis L.	31.6334	-7.99837
Erigeron bonariensis L.	31.6294	-8.01762
Erigeron bonariensis L.	34.8287	-2.8811
Erigeron bonariensis L.	34.5487	-3.0111
Erigeron bonariensis L.	35.3787	-5.16115
Erigeron bonariensis L.	35.0987	-5.26115
Erigeron bonariensis L.	35.2587	-5.22115
Erigeron bonariensis L.	35.0287	-5.48115
Erigeron bonariensis L.	31.6199	-7.9792
Erigeron canadensis L.	32.337	-6.34258
Erigeron canadensis L.	35.2187	-5.37115
Erigeron crispus Pourr.	33.9717	-6.84861
Erigeron crispus Pourr.	33.9717	-6.84861
Erigeron karvinskianus DC.	33.844	-5.59255
Erigeron sumatrensis Retz.	35.4287	-5.11115
Erigeron sumatrensis Retz.	35.3587	-5.03115
Erigeron sumatrensis Retz.	35.3087	-5.05115
Erigeron sumatrensis Retz.	35.2187	-5.37115
Esox lucius Linnaeus, 1758	34.6647	-2.94138
Esox lucius Linnaeus, 1758	35.0171	-2.87208
Esox lucius Linnaeus, 1758	35.0175	-2.87225
Eudendrium carneum Clarke, 1882	35.0999	-2.28766
Ficus carica L.	30.5159	-9.67107
Ficus carica L.	35.2387	-5.17936
Ficus carica L.	34.0739	-5.55557
Ficus carica L.	30.9233	-6.92826
Ficus carica L.	34.074	-5.55525
Ficus carica L.	33.8966	-5.53198
Ficus carica L.	34.0308	-4.99784
Ficus carica L.	34.0739	-5.5556
Ficus carica L.	34.0742	-5.55558
Ficus carica L.	34.0747	-5.55539
Ficus carica L.	34.0739	-5.5551
Ficus carica L.	31.6318	-7.99118
Ficus carica L.	31.5124	-9.76548
Ficus carica L.	29.7653	-8.95158
Ficus carica L.	32.0183	-6.71974
Ficus carica L.	31.6318	-7.9957
Ficus carica L.	31.1315	-7.13056
Ficus carica L.	29.7709	-8.76066
Ficus carica L.	31.6316	-7.9914
Ficus carica L.	33.9496	-6.82102
Ficus carica L.	31.5486	-7.60061
Ficus carica L.	31.3072	-7.73742
Ficus carica L.	35.167	-5.26264
Ficus carica L.	35.2785	-2.95895
Ficus carica L.	32.0149	-6.71947
Ficus carica L.	31.6302	-5.84309
Ficus carica L.	31.587	-5.59225
Ficus carica L.	34.0315	-6.83864
Ficus carica L.	31.6302	-5.84309
Ficus carica L.	31.1013	-7.30732
Ficus carica L.	34.0279	-6.84319
Ficus carica L.	31.5198	-5.93108
Ficus carica L.	31.2217	-7.67121
Ficus carica L.	34.0739	-5.55493
Ficus carica L.	31.1359	-7.9261
Ficus carica L.	34.0744	-5.55309
Ficus carica L.	32.0162	-6.72082
Ficus carica L.	30.5906	-9.51775
Ficus carica L.	34.0749	-5.55448
Ficus carica L.	32.0163	-6.72309
Ficus carica L.	30.8303	-6.95299
Ficus carica L.	31.6129	-8.0018
Ficus carica L.	34.4205	-2.88806
Ficus carica L.	31.2646	-7.8188
Ficus carica L.	34.4143	-2.8857
Ficus carica L.	31.5281	-5.53341
Ficus carica L.	33.4326	-5.2163
Ficus carica L.	33.294	-5.49121
Ficus carica L.	32.1357	-6.33781
Ficus carica L.	35.1694	-5.26
Ficus carica L.	31.7071	-7.93343
Ficus carica L.	31.631	-7.99256
Ficus carica L.	29.2207	-10.185
Ficus carica L.	31.2905	-7.65934
Ficus carica L.	34.0318	-6.8371
Ficus carica L.	34.0318	-6.83709
Ficus carica L.	35.1689	-5.2678
Ficus carica L.	35.1688	-5.26805
Ficus carica L.	35.169	-5.26546
Ficus carica L.	34.0319	-6.83703
Ficus carica L.	33.3774	-7.56752
Ficus carica L.	34.0319	-6.83708
Ficus carica L.	34.0316	-6.83914
Ficus carica L.	30.8096	-7.38659
Ficus carica L.	31.1555	-7.52984
Ficus carica L.	31.6877	-7.84991
Ficus carica L.	29.2219	-10.0868
Ficus carica L.	31.6908	-8.03078
Ficus carica L.	31.0741	-7.53064
Ficus carica L.	31.6	-7.91872
Ficus carica L.	31.4426	-5.43085
Ficus carica L.	30.3931	-8.69186
Ficus carica L.	35.172	-5.26066
Ficus carica L.	31.5841	-4.78385
Ficus carica L.	29.7525	-9.24213
Ficus carica L.	31.4235	-8.07285
Ficus carica L.	31.6089	-5.52752
Ficus carica L.	34.9259	-2.71496
Ficus carica L.	30.5908	-9.51597
Ficus carica L.	30.5939	-9.51392
Ficus carica L.	31.4984	-5.94587
Ficus carica L.	34.8666	-2.48716
Ficus carica L.	31.5558	-5.90559
Ficus carica L.	35.1669	-5.26299
Ficus carica L.	31.2964	-7.1355
Ficus carica L.	34.046	-5.28137
Ficus carica L.	34.4245	-5.50875
Ficus carica L.	29.7293	-9.0345
Ficus carica L.	31.6154	-8.00994
Ficus carica L.	35.117	-3.64216
Ficus carica L.	34.9317	-2.71787
Ficus carica L.	35.6617	-5.34888
Ficus carica L.	34.3979	-2.93394
Ficus carica L.	31.2632	-7.82183
Ficus carica L.	31.1748	-3.94079
Ficus carica L.	31.521	-9.63007
Ficus carica L.	34.0316	-6.83902
Ficus carica L.	31.2199	-7.66888
Ficus carica L.	31.2257	-7.67403
Ficus carica L.	31.2218	-7.67127
Ficus carica L.	31.5839	-5.59158
Ficus carica L.	34.0759	-5.55305
Ficus carica L.	34.0733	-5.55499
Ficus carica L.	32.0514	-4.38134
Ficus carica L.	32.5339	-6.12818
Ficus carica L.	32.0185	-6.72414
Ficus carica L.	33.6825	-5.4692
Ficus carica L.	31.4338	-9.66179
Ficus carica L.	35.7762	-5.82467
Ficus carica L.	35.6789	-5.90044
Ficus carica L.	30.5227	-9.65434
Ficus carica L.	34.9939	-2.16362
Ficus carica L.	34.0416	-6.79996
Ficus carica L.	31.1093	-6.58092
Ficus carica L.	31.6714	-8.09581
Ficus carica L.	34.0684	-6.4893
Ficus carica L.	35.169	-5.25796
Ficus carica L.	31.3125	-6.68042
Ficus carica L.	31.5209	-9.63022
Ficus carica L.	30.7625	-8.75864
Ficus carica L.	30.9255	-6.90935
Ficus carica L.	35.5145	-5.93191
Ficus carica L.	33.8248	-4.84575
Ficus carica L.	33.9514	-6.92687
Ficus carica L.	31.6331	-8.01163
Ficus carica L.	35.5714	-5.35922
Ficus carica L.	35.5767	-5.35651
Ficus carica L.	35.5868	-5.3426
Ficus carica L.	31.6349	-8.01567
Ficus carica L.	30.8236	-6.94655
Ficus carica L.	31.582	-5.59092
Ficus carica L.	35.0974	-5.30648
Ficus carica L.	33.7299	-5.46663
Ficus carica L.	33.7299	-5.46663
Ficus carica L.	33.8531	-4.87124
Ficus carica L.	31.5907	-9.24217
Ficus carica L.	31.2175	-3.97724
Ficus carica L.	31.1946	-5.86418
Ficus carica L.	34.0165	-6.82564
Ficus carica L.	34.0125	-6.82075
Ficus carica L.	33.5971	-7.65253
Ficus carica L.	32.0145	-6.72154
Ficus carica L.	32.0176	-6.72426
Ficus carica L.	32.0167	-6.72259
Ficus carica L.	35.1685	-5.2546
Ficus carica L.	31.7237	-6.96659
Ficus carica L.	34.8203	-5.40188
Ficus carica L.	34.9808	-2.32222
Ficus carica L.	35.0999	-2.28766
Ficus carica L.	33.841	-6.93359
Ficus carica L.	32.7904	-8.09867
Ficus carica L.	30.3522	-9.47946
Ficus carica L.	33.6501	-7.47685
Ficus carica L.	31.6639	-8.00611
Ficus carica L.	35.1707	-5.25689
Ficus carica L.	31.503	-7.92359
Ficus carica L.	33.2241	-8.2273
Ficus carica L.	34.682	-1.90016
Ficus carica L.	33.9072	-6.78825
Ficus carica L.	29.8396	-9.15432
Ficus carica L.	31.2245	-7.67249
Ficus carica L.	34.9241	-5.34153
Ficus carica L.	30.5998	-9.49683
Ficus carica L.	33.5908	-7.64166
Ficus carica L.	33.5717	-7.57303
Ficus carica L.	33.0725	-7.61284
Ficus carica L.	29.693	-9.7268
Ficus carica L.	33.5557	-7.63846
Ficus carica L.	30.2906	-9.23138
Ficus carica L.	34.0592	-5.01106
Ficus carica L.	33.8992	-5.52786
Ficus carica L.	30.1571	-9.54109
Ficus carica L.	33.8291	-5.27038
Ficus carica L.	35.8229	-5.64061
Ficus carica L.	32.7265	-9.04604
Ficus carica L.	33.8158	-4.51831
Ficus carica L.	34.3101	-2.16018
Ficus carica L.	35.7699	-5.91311
Ficus carica L.	31.4196	-7.78314
Ficus carica L.	29.7015	-9.82954
Ficus carica L.	35.1694	-5.26501
Ficus carica L.	35.1695	-5.25729
Ficus carica L.	32.3815	-6.54432
Ficus carica L.	33.4406	-7.82167
Ficus carica L.	30.4663	-9.62243
Ficus carica L.	30.5026	-9.67209
Ficus carica L.	35.1278	-2.98194
Ficus carica L.	31.642	-8.00265
Ficus carica L.	33.5903	-7.64139
Ficus carica L.	34.3345	-5.15894
Ficus carica L.	32.0157	-6.72115
Ficus carica L.	34.0589	-4.97704
Ficus carica L.	33.5065	-4.54141
Ficus carica L.	31.6309	-7.99026
Ficus carica L.	34.0728	-5.55451
Ficus carica L.	34.0731	-5.55465
Ficus carica L.	34.058	-4.97513
Ficus carica L.	34.9329	-4.73003
Ficus carica L.	35.6091	-5.98649
Ficus carica L.	35.6994	-5.81042
Ficus carica L.	35.7853	-5.81236
Ficus carica L.	31.5671	-5.58059
Ficus carica L.	34.962	-2.0979
Ficus carica L.	31.8157	-7.6459
Ficus carica L.	31.1316	-7.91928
Ficus carica L.	34.962	-2.09799
Ficus carica L.	32.8594	-7.77912
Ficus carica L.	29.9877	-9.66619
Ficus carica L.	30.4805	-9.21419
Ficus carica L.	33.3197	-7.54325
Ficus carica L.	33.9576	-6.847
Ficus carica L.	33.9576	-6.847
Ficus carica L.	33.5626	-7.63282
Ficus carica L.	33.5247	-7.80122
Ficus carica L.	33.9499	-6.87161
Ficus carica L.	31.7493	-8.10875
Ficus carica L.	31.337	-7.95066
Ficus carica L.	35.1048	-5.43865
Ficus carica L.	34.1753	-4.30944
Ficus carica L.	33.4876	-7.58778
Ficus carica L.	34.1753	-4.30944
Ficus carica L.	33.4876	-7.58778
Ficus carica L.	31.6277	-8.1199
Ficus carica L.	35.6159	-5.72537
Ficus carica L.	34.1027	-6.57484
Ficus carica L.	33.6051	-7.55205
Ficus carica L.	33.6051	-7.55205
Ficus carica L.	33.599	-7.49081
Ficus carica L.	33.6051	-7.55205
Ficus carica L.	33.868	-6.87369
Ficus carica L.	33.6169	-7.53739
Ficus carica L.	34.3292	-5.92384
Ficus carica L.	31.2798	-4.25896
Ficus carica L.	32.1207	-6.64748
Ficus carica L.	31.0119	-7.08932
Ficus carica L.	32.0756	-6.71402
Ficus carica L.	31.0164	-7.1005
Ficus carica L.	32.0301	-6.75819
Ficus carica L.	32.1232	-6.65241
Ficus carica L.	31.1408	-7.94095
Ficus carica L.	32.1086	-6.77934
Ficus carica L.	32.0006	-6.68269
Ficus carica L.	35.3004	-5.38211
Ficus carica L.	35.1702	-5.26428
Ficus carica L.	31.6231	-7.99552
Ficus carica L.	31.6231	-7.99552
Ficus carica L.	32.9394	-5.6675
Ficus carica L.	33.7167	-5.21667
Ficus carica L.	33.7167	-5.21667
Ficus carica L.	31.48	-6.23
Ficus carica L.	31.4833	-6.23333
Ficus carica L.	31.4833	-6.2333
Ficus carica L.	35.25	-5.05
Ficus carica L.	31.6231	-7.99552
Ficus carica L.	35.6187	-5.82117
Ficus carica L.	32.1987	-6.51113
Ficus carica L.	35.2087	-5.03115
Ficus carica L.	35.2487	-5.05115
Ficus carica L.	35.1787	-5.25115
Ficus carica L.	35.2887	-5.40116
Ficus carica L.	35.25	-5.05
Ficus carica L.	35.2167	-5.03333
Ficus carica L.	31.4833	-6.23333
Fundulus heteroclitus (Linnaeus, 1766)	35.1142	-2.34585
Fundulus heteroclitus (Linnaeus, 1766)	35.1091	-2.36252
Fundulus heteroclitus (Linnaeus, 1766)	35.1046	-2.34472
Fundulus heteroclitus (Linnaeus, 1766)	35.123	-2.34121
Fundulus heteroclitus (Linnaeus, 1766)	35.1011	-2.35084
Fundulus heteroclitus (Linnaeus, 1766)	35.1194	-2.33758
Gambusia holbrooki Girard, 1859	34.0111	-6.85001
Gambusia holbrooki Girard, 1859	29.8827	-6.1186
Gambusia holbrooki Girard, 1859	34.8587	-2.70479
Gambusia holbrooki Girard, 1859	34.7794	-2.15389
Gambusia holbrooki Girard, 1859	33.549	-5.09823
Gambusia holbrooki Girard, 1859	30.4533	-8.88513
Gambusia holbrooki Girard, 1859	32.3134	-3.47967
Gambusia holbrooki Girard, 1859	35.1517	-2.90492
Gambusia holbrooki Girard, 1859	35.1035	-2.74586
Gambusia holbrooki Girard, 1859	35.1472	-2.90292
Gambusia holbrooki Girard, 1859	34.2421	-2.33666
Gambusia holbrooki Girard, 1859	34.2064	-2.64786
Gambusia holbrooki Girard, 1859	34.421	-2.88136
Gambusia holbrooki Girard, 1859	34.2269	-2.39292
Gambusia holbrooki Girard, 1859	34.2393	-2.40967
Gambusia holbrooki Girard, 1859	34.5601	-3.04261
Gambusia holbrooki Girard, 1859	34.5614	-3.03049
Gambusia holbrooki Girard, 1859	34.5463	-3.0253
Gambusia holbrooki Girard, 1859	34.2416	-3.32039
Gambusia holbrooki Girard, 1859	35.1052	-2.34583
Gambusia holbrooki Girard, 1859	34.9352	-2.31142
Gambusia holbrooki Girard, 1859	34.217	-3.34456
Gambusia holbrooki Girard, 1859	35.0852	-3.81866
Gambusia holbrooki Girard, 1859	34.9728	-3.37491
Gambusia holbrooki Girard, 1859	35.13	-2.88383
Gambusia holbrooki Girard, 1859	35.0517	-2.96294
Gambusia holbrooki Girard, 1859	35.0873	-2.93439
Gambusia holbrooki Girard, 1859	35.0177	-2.87667
Gambusia holbrooki Girard, 1859	35.0531	-2.90525
Gambusia holbrooki Girard, 1859	35.0635	-2.90639
Gambusia holbrooki Girard, 1859	35.2136	-3.18372
Gambusia holbrooki Girard, 1859	35.0592	-2.94878
Gambusia holbrooki Girard, 1859	34.9076	-2.63579
Gambusia holbrooki Girard, 1859	34.839	-2.356
Gambusia holbrooki Girard, 1859	35.1011	-2.35084
Gambusia holbrooki Girard, 1859	34.8864	-2.6625
Gambusia holbrooki Girard, 1859	35.0516	-2.42844
Gambusia holbrooki Girard, 1859	35.0976	-2.38861
Gambusia holbrooki Girard, 1859	34.9454	-2.41347
Gambusia holbrooki Girard, 1859	34.9643	-2.45719
Gambusia holbrooki Girard, 1859	35.0997	-2.32836
Gambusia holbrooki Girard, 1859	32.1324	-2.88392
Gambusia holbrooki Girard, 1859	29.841	-5.47949
Gambusia holbrooki Girard, 1859	29.9539	-5.45662
Gambusia holbrooki Girard, 1859	30.0733	-5.449
Gambusia holbrooki Girard, 1859	31.6413	-8.00314
Gambusia holbrooki Girard, 1859	34.1217	-5.19248
Gambusia holbrooki Girard, 1859	34.0288	-5.2267
Gambusia holbrooki Girard, 1859	35.4315	-5.10363
Gambusia holbrooki Girard, 1859	33.5752	-4.97747
Gambusia holbrooki Girard, 1859	34.1026	-5.02034
Gambusia holbrooki Girard, 1859	33.564	-5.12453
Gambusia holbrooki Girard, 1859	34.0593	-6.10367
Gambusia holbrooki Girard, 1859	34.2472	-5.94174
Gambusia holbrooki Girard, 1859	34.0897	-5.57996
Gambusia holbrooki Girard, 1859	33.7479	-6.18555
Gambusia holbrooki Girard, 1859	34.2938	-6.58512
Gambusia holbrooki Girard, 1859	33.8456	-6.95654
Gambusia holbrooki Girard, 1859	33.7607	-4.91179
Gambusia holbrooki Girard, 1859	33.6469	-4.88502
Gambusia holbrooki Girard, 1859	30.36	-9.57574
Gambusia holbrooki Girard, 1859	33.1537	-5.09175
Gambusia holbrooki Girard, 1859	31.6258	-7.9892
Glycaspis brimblecombei Moore, 1964	33.5864	-7.62379
Glycaspis brimblecombei Moore, 1964	33.9871	-6.84163
Glycaspis brimblecombei Moore, 1964	31.6261	-8.01758
Glycaspis brimblecombei Moore, 1964	33.3778	-7.56719
Glycaspis brimblecombei Moore, 1964	31.6264	-8.01787
Gomphocarpus fruticosus (L.) W.T.Aiton	35.8759	-5.39902
Gomphocarpus fruticosus (L.) W.T.Aiton	35.2838	-5.23328
Gomphocarpus fruticosus (L.) W.T.Aiton	35.8997	-5.47436
Gomphocarpus fruticosus (L.) W.T.Aiton	35.2924	-5.2322
Gomphocarpus fruticosus (L.) W.T.Aiton	35.2924	-5.23217
Gomphocarpus fruticosus (L.) W.T.Aiton	35.28	-5.22
Gomphocarpus fruticosus (L.) W.T.Aiton	35.27	-5.25
Gomphocarpus fruticosus (L.) W.T.Aiton	35.2875	-5.2353
Gomphocarpus fruticosus (L.) W.T.Aiton	35.4033	-5.0925
Gomphocarpus fruticosus (L.) W.T.Aiton	35.55	-5.2333
Gomphocarpus fruticosus (L.) W.T.Aiton	35.4536	-5.09944
Gomphocarpus fruticosus (L.) W.T.Aiton	35.569	-5.3705
Gomphocarpus fruticosus (L.) W.T.Aiton	35.569	-5.3705
Gomphocarpus fruticosus (L.) W.T.Aiton	35.5893	-5.2883
Gomphocarpus fruticosus (L.) W.T.Aiton	35.57	-5.36
Gomphocarpus fruticosus (L.) W.T.Aiton	35.7888	-5.5022
Gomphocarpus fruticosus (L.) W.T.Aiton	35.5667	-5.3667
Gomphocarpus fruticosus (L.) W.T.Aiton	35.5667	-5.3667
Gomphocarpus fruticosus (L.) W.T.Aiton	32.0387	-3.05107
Gomphocarpus fruticosus (L.) W.T.Aiton	35.3587	-5.03115
Gomphocarpus fruticosus (L.) W.T.Aiton	35.2487	-5.05115
Gomphocarpus fruticosus (L.) W.T.Aiton	35.2587	-5.25115
Gomphocarpus fruticosus (L.) W.T.Aiton	35.4087	-5.11115
Gomphocarpus fruticosus (L.) W.T.Aiton	35.2787	-5.23115
Gomphocarpus fruticosus (L.) W.T.Aiton	35.2787	-5.21115
Gomphocarpus fruticosus (L.) W.T.Aiton	35.1787	-5.25115
Gomphocarpus fruticosus (L.) W.T.Aiton	35.2687	-5.25115
Gomphocarpus fruticosus (L.) W.T.Aiton	35.2887	-5.22115
Gomphocarpus fruticosus (L.) W.T.Aiton	35.2787	-5.27115
Gomphocarpus fruticosus (L.) W.T.Aiton	35.7187	-5.38116
Gomphocarpus fruticosus (L.) W.T.Aiton	35.7087	-5.49116
Gomphocarpus fruticosus (L.) W.T.Aiton	35.2667	-5.25
Gomphocarpus fruticosus (L.) W.T.Aiton	35.2833	-5.21667
Hedera helix L.	34.8566	-2.70465
Hedera helix L.	33.6275	-7.16274
Hedera helix L.	34.0313	-5.00449
Hedera helix L.	33.5377	-5.11403
Hedera helix L.	31.3069	-7.73633
Hedera helix L.	33.6162	-7.11388
Hedera helix L.	35.7804	-5.82139
Hedera helix L.	31.6309	-8.00925
Hedera helix L.	33.4342	-5.22487
Hedera helix L.	35.2691	-5.11821
Hedera helix L.	33.9948	-6.82431
Hedera helix L.	33.9944	-6.82451
Hedera helix L.	33.9948	-6.82431
Hedera helix L.	30.3903	-9.51396
Hedera helix L.	29.7942	-9.05573
Hedera helix L.	29.7942	-9.05573
Hedera helix L.	29.7942	-9.05573
Hedera helix L.	29.7942	-9.05573
Hedera helix L.	29.7942	-9.05573
Hedera helix L.	29.7942	-9.05573
Hedera helix L.	29.7942	-9.05573
Hedera helix L.	29.7942	-9.05573
Hedera helix L.	31.6231	-7.99552
Hedera helix L.	35.1	-5.13
Hedera helix L.	35.28	-5.12
Hedera helix L.	35.6922	-5.45694
Hedera helix L.	32.9124	-5.38872
Hedera helix L.	35.1257	-5.1417
Hedera helix L.	33.2853	-5.3362
Hedera helix L.	34.0181	-5.00785
Hedera helix L.	35.7869	-5.88222
Hedera helix L.	32.4656	-4.99833
Hedera helix L.	31.0816	-8.69995
Hedera helix L.	31.1008	-8.56361
Hedera helix L.	31.7321	-7.01146
Hedera helix L.	37.05	-8.55
Hedera helix L.	35.5387	-5.37116
Hedera helix L.	35.1987	-2.95111
Hedera helix L.	35.0887	-5.03115
Hedera helix L.	35.7987	-5.82117
Hedera helix L.	32.1987	-6.51113
Hedera helix L.	32.1987	-6.51113
Helianthus annuus L.	35.4463	-5.39327
Helianthus annuus L.	35.1776	-2.92598
Helianthus annuus L.	34.4128	-2.90379
Helianthus annuus L.	35.4462	-5.3933
Helianthus annuus L.	35.0999	-2.28766
Helianthus annuus L.	33.4916	-7.58977
Helianthus annuus L.	31.4501	-9.69876
Helianthus annuus L.	29.9684	-5.58761
Helianthus annuus L.	33.5931	-7.61639
Helianthus annuus L.	33.5931	-7.61639
Helicoverpa armigera (Hübner, 1808)	29.0878	-10.3372
Helicoverpa armigera (Hübner, 1808)	29.0878	-10.3367
Helicoverpa armigera (Hübner, 1808)	29.7559	-8.96228
Helicoverpa armigera (Hübner, 1808)	28.8262	-10.2339
Helicoverpa armigera (Hübner, 1808)	29.7559	-8.96239
Helicoverpa armigera (Hübner, 1808)	30.7718	-4.18313
Helicoverpa armigera (Hübner, 1808)	30.7718	-4.18314
Helicoverpa armigera (Hübner, 1808)	30.7718	-4.18312
Helicoverpa armigera (Hübner, 1808)	29.0879	-10.3365
Helicoverpa armigera (Hübner, 1808)	30.7652	-4.1736
Helicoverpa armigera (Hübner, 1808)	29.8522	-7.26342
Helicoverpa armigera (Hübner, 1808)	30.8533	-9.80654
Helicoverpa armigera (Hübner, 1808)	31.6576	-8.00408
Helicoverpa armigera (Hübner, 1808)	31.0829	-7.91548
Helicoverpa armigera (Hübner, 1808)	30.9318	-6.91722
Helicoverpa armigera (Hübner, 1808)	33.5066	-5.18038
Helicoverpa armigera (Hübner, 1808)	31.264	-7.8197
Helicoverpa armigera (Hübner, 1808)	33.5067	-5.18041
Helicoverpa armigera (Hübner, 1808)	31.46	-7.45491
Helicoverpa armigera (Hübner, 1808)	31.4475	-9.56446
Helicoverpa armigera (Hübner, 1808)	31.2438	-7.97566
Helicoverpa armigera (Hübner, 1808)	29.0004	-10.3406
Helicoverpa armigera (Hübner, 1808)	30.5231	-7.89388
Helicoverpa armigera (Hübner, 1808)	31.2584	-7.32804
Helicoverpa armigera (Hübner, 1808)	30.4758	-8.93878
Helicoverpa armigera (Hübner, 1808)	30.677	-9.47723
Helicoverpa armigera (Hübner, 1808)	31.515	-9.76891
Helicoverpa armigera (Hübner, 1808)	31.4553	-9.56322
Helicoverpa armigera (Hübner, 1808)	31.362	-5.98988
Helicoverpa armigera (Hübner, 1808)	29.7403	-7.97508
Helicoverpa armigera (Hübner, 1808)	31.4345	-7.52861
Helicoverpa armigera (Hübner, 1808)	33.3794	-7.62145
Helicoverpa armigera (Hübner, 1808)	33.5514	-7.63912
Helicoverpa armigera (Hübner, 1808)	31.7239	-6.96639
Helicoverpa armigera (Hübner, 1808)	31.205	-7.85861
Helicoverpa armigera (Hübner, 1808)	31.7239	-6.96639
[truncated: 2,467 more rows]

## Sheet: 4_Verified_Occurrences
Scientific_Name	Latitude	Longitude
Abutilon grandifolium	31.6237	-8.01159
Abutilon grandifolium	29.9625	-9.65693
Abutilon grandifolium	33.3795	-7.5666
Abutilon grandifolium	35.0999	-2.28766
Abutilon grandifolium	32.3016	-9.23708
Acacia cyclops	30.0567	-9.65499
Acacia cyclops	30.0654	-9.66146
Acacia cyclops	29.1884	-10.2756
Acacia cyclops	30.0644	-9.66111
Acacia cyclops	30.0738	-9.66771
Acacia cyclops	30.2888	-9.56209
Acacia cyclops	30.0643	-9.66094
Acacia cyclops	30.0686	-9.66369
Acacia farnesiana	31.6192	-8.00916
Acacia farnesiana	31.6683	-8.11401
Acacia farnesiana	30.2584	-5.68084
Acacia farnesiana	31.586	-8.01097
Acacia farnesiana	31.6295	-7.98108
Acacia farnesiana	30.4727	-8.87488
Acacia farnesiana	30.4703	-8.87694
Acacia farnesiana	35.578	-5.368
Acacia karroo	28.4438	-11.1015
Acacia karroo	30.0819	-9.66833
Acacia karroo	30.0568	-9.65493
Acacia karroo	32.0131	-6.71778
Acacia karroo	30.0243	-9.62318
Acacia karroo	29.6106	-9.94406
Acacia karroo	29.6109	-9.9449
Acacia karroo	31.5247	-7.47658
Acacia karroo	31.5248	-7.47654
Acacia karroo	35.7594	-5.83395
Acacia karroo	31.3145	-7.74845
Acacia karroo	31.462	-7.99636
Acacia karroo	31.499	-7.79267
Acacia karroo	33.0154	-5.63134
Acacia karroo	33.9532	-6.84822
Acacia karroo	30.3312	-9.60548
Acacia karroo	30.3852	-9.57733
Acacia karroo	31.6225	-7.97798
Acacia karroo	34.4213	-2.91562
Acacia karroo	31.6638	-8.00118
Acacia karroo	31.6675	-8.00304
Acacia karroo	34.4543	-5.50683
Acacia karroo	34.0316	-6.83929
Acacia karroo	31.4242	-7.8435
Acacia karroo	33.6397	-7.40589
Acacia karroo	33.0703	-7.23143
Acacia karroo	34.9395	-2.70869
Acacia karroo	34.107	-4.88932
Acacia karroo	33.2564	-5.51203
Acacia karroo	30.0819	-9.66833
Acacia karroo	31.5747	-7.97641
Acacia karroo	33.9338	-6.82317
Acacia karroo	31.5976	-9.52822
Acacia karroo	34.402	-2.87866
Acacia karroo	34.4205	-2.88733
Acacia karroo	34.9273	-2.711
Acacia karroo	34.923	-2.72993
Acacia karroo	31.4469	-5.44078
Acacia karroo	30.0768	-9.66798
Acacia karroo	30.4244	-9.60855
Acacia karroo	34.0317	-6.83921
Acacia karroo	30.0769	-9.66803
Acacia karroo	33.8924	-6.9683
Acacia karroo	30.0558	-9.65101
Acacia karroo	34.8543	-6.22028
Acacia karroo	31.6201	-8.02222
Acacia karroo	31.6304	-8.03021
Acacia karroo	31.627	-8.0271
Acacia karroo	31.6204	-8.0209
Acacia karroo	35.5845	-5.33732
Acacia karroo	30.3683	-9.56384
Acacia karroo	32.7449	-9.02257
Acacia karroo	33.0701	-7.23137
Acacia karroo	34.4887	-2.04447
Acacia karroo	31.6526	-8.04846
Acacia karroo	30.4089	-9.60006
Acacia karroo	35.1953	-6.1575
Acacia karroo	35.7906	-5.86102
Acacia karroo	32.2945	-9.24025
Acacia karroo	30.0696	-9.662
Acacia karroo	31.3751	-7.77994
Acacia karroo	32.0597	-6.67852
Acacia karroo	35.1588	-6.1039
Acacia karroo	30.4002	-9.58428
Acacia karroo	35.7352	-5.86486
Acacia karroo	33.2219	-5.35639
Acacia karroo	30.0686	-9.66369
Acacia karroo	34.5793	-4.42462
Acacia karroo	34.57	-3.07
Acacia karroo	34.5667	-3.06667
Acacia karroo	34.0333	-6.65
Acacia karroo	34.5387	-6.00115
Acacia karroo	35.2187	-5.32115
Acacia melanoxylon	30.2146	-9.58895
Acacia melanoxylon	33.9537	-6.89761
Acacia melanoxylon	35.7905	-5.86187
Acacia melanoxylon	35.7935	-5.86446
Acacia melanoxylon	30.0608	-9.68445
Acacia melanoxylon	30.0691	-9.67827
Acacia melanoxylon	30.0536	-9.68445
Acacia melanoxylon	30.0536	-9.68582
Acacia melanoxylon	30.0355	-9.639
Acacia melanoxylon	31.52	-9.77
Acacia melanoxylon	34.0167	-6.83333
Acacia saligna	35.1238	-4.48271
Acacia saligna	30.0646	-9.66134
Acacia saligna	30.0725	-9.66621
Acacia saligna	30.0713	-9.66549
Acacia saligna	30.0731	-9.66646
Acacia saligna	30.074	-9.66671
Acacia saligna	30.0684	-9.66342
Acacia saligna	30.0712	-9.665
Acacia saligna	30.0712	-9.665
Acacia saligna	30.0407	-9.65605
Acacia saligna	30.0721	-9.65756
Acacia saligna	30.062	-9.65861
Acacia saligna	30.0591	-9.65724
Acacia saligna	30.0682	-9.66329
Acacia saligna	30.0607	-9.65866
Acacia saligna	30.0613	-9.65908
Acacia saligna	30.3822	-8.69764
Acacia saligna	30.0607	-9.65908
Acacia saligna	30.0683	-9.66332
Acacia saligna	32.2179	-6.53105
Acacia saligna	30.2207	-9.14786
Acacia saligna	31.6803	-7.97522
Acacia saligna	29.5488	-9.3392
Acacia saligna	33.9307	-4.98414
Acacia saligna	30.0783	-9.66947
Acacia saligna	31.2312	-7.98069
Acacia saligna	31.4543	-9.56987
Acacia saligna	33.3762	-7.57762
Acacia saligna	30.074	-9.66669
Acacia saligna	35.7889	-5.80987
Acacia saligna	35.0895	-2.71939
Acacia saligna	30.5303	-7.90983
Acacia saligna	27.9439	-12.9249
Acacia saligna	30.0621	-9.65971
Acacia saligna	34.9052	-2.63652
Acacia saligna	33.5555	-7.67244
Acacia saligna	33.2845	-8.33816
Acacia saligna	33.9515	-6.82437
Acacia saligna	33.4908	-7.59904
Acacia saligna	35.5825	-5.33703
Acacia saligna	33.3816	-7.56812
Acacia saligna	33.3079	-8.35353
Acacia saligna	30.0914	-9.66574
Acacia saligna	30.0791	-9.6391
Acacia saligna	33.4659	-7.60286
Acacia saligna	33.4659	-7.60286
Acacia saligna	33.2975	-4.68018
Acacia saligna	30.0634	-9.66475
Acacia saligna	31.9251	-4.38436
Acacia saligna	30.4032	-9.58727
Acacia saligna	31.5438	-7.53712
Acacia saligna	31.0688	-6.56092
Acacia saligna	31.0688	-6.56092
Acacia saligna	31.0688	-6.56092
Acacia saligna	35.1275	-2.3748
Acacia saligna	35.1083	-2.2922
Acacia saligna	35.0287	-5.45115
Agave americana	31.2517	-7.97758
Agave americana	33.9907	-5.56246
Agave americana	31.555	-9.69002
Agave americana	33.6097	-7.65063
Agave americana	35.0941	-2.67778
Agave americana	34.0583	-4.98665
Agave americana	34.1223	-4.25944
Agave americana	34.0436	-4.99562
Agave americana	33.9508	-6.92975
Agave americana	33.6096	-7.6506
Agave americana	33.6034	-7.66034
Agave americana	30.1252	-9.6499
Agave americana	30.4618	-8.90854
Agave americana	34.4136	-2.87958
Agave americana	35.1867	-5.27095
Agave americana	35.3132	-2.96028
Agave americana	33.4327	-5.21546
Agave americana	33.4078	-7.54456
Agave americana	31.6609	-7.97975
Agave americana	32.4759	-7.95108
Agave americana	33.5883	-7.68148
Agave americana	33.8267	-4.41461
Agave americana	34.8548	-2.47273
Agave americana	35.1657	-5.25554
Agave americana	31.166	-8.04834
Agave americana	31.7762	-9.48722
Agave americana	34.0098	-6.82044
Agave americana	34.2553	-6.66531
Agave americana	34.0293	-6.82535
Agave americana	34.4125	-2.88026
Agave americana	31.3104	-7.75546
Agave americana	31.6159	-8.00979
Agave americana	34.412	-2.90625
Agave americana	34.8931	-2.29519
Agave americana	34.9394	-2.72838
Agave americana	35.1652	-5.25444
Agave americana	34.9394	-2.72839
Agave americana	34.4105	-2.90572
Agave americana	34.8633	-2.46691
Agave americana	31.2638	-7.82136
Agave americana	34.137	-5.54824
Agave americana	31.3153	-7.74392
Agave americana	32.6976	-7.77727
Agave americana	34.4125	-2.88036
Agave americana	33.2215	-8.22678
Agave americana	33.4625	-4.67099
Agave americana	34.0375	-5.38119
Agave americana	31.132	-7.97607
Agave americana	32.9236	-5.55965
Agave americana	35.1688	-5.25497
Agave americana	33.8541	-6.851
Agave americana	33.8543	-6.85137
Agave americana	33.8016	-4.98762
Agave americana	34.0721	-5.5528
Agave americana	34.8473	-2.47846
Agave americana	31.4127	-7.83713
Agave americana	33.2983	-8.35204
Agave americana	34.0081	-6.82006
Agave americana	29.8887	-9.23413
Agave americana	31.1931	-8.05791
Agave americana	33.5908	-7.64222
Agave americana	34.2449	-6.68041
Agave americana	33.824	-4.70104
Agave americana	33.9638	-5.54626
Agave americana	34.126	-5.5502
Agave americana	32.2734	-4.48685
Agave americana	31.7582	-7.99111
Agave americana	35.1677	-5.25507
Agave americana	35.7353	-5.93055
Agave americana	33.8039	-5.51367
Agave americana	33.9522	-6.92568
Agave americana	31.6404	-8.00316
Agave americana	35.1686	-5.25502
Agave americana	35.1723	-5.26477
Agave americana	35.1709	-5.25759
Agave americana	33.0912	-5.3876
Agave americana	32.9207	-5.57879
Agave americana	35.1675	-5.2551
Agave americana	34.0701	-4.97983
Agave americana	34.006	-6.82084
Agave americana	31.7917	-7.09262
Agave americana	35.1658	-5.25552
Agave americana	33.6987	-7.29629
Agave americana	34.0321	-4.98416
Agave americana	34.0049	-6.71837
Agave americana	33.959	-6.51139
Agave americana	34.0072	-6.8216
Agave americana	35.1444	-2.42752
Agave americana	35.2587	-5.33115
Agave sisalana	34.4031	-2.91814
Agave sisalana	34.2553	-6.66531
Agave sisalana	33.8497	-6.78221
Agave sisalana	34.4032	-2.91822
Agave sisalana	31.3907	-7.84044
Ailanthus altissima	35.1705	-5.27151
Ailanthus altissima	31.6258	-7.99955
Ailanthus altissima	34.0113	-6.84976
Ailanthus altissima	34.4205	-2.88817
Ailanthus altissima	34.0304	-5.00448
Ailanthus altissima	34.0301	-5.00452
Ailanthus altissima	31.6308	-7.85734
Ailanthus altissima	34.4301	-2.88841
Ailanthus altissima	34.4206	-2.8877
Ailanthus altissima	31.6238	-7.99418
Ailanthus altissima	33.3626	-4.73363
Ailanthus altissima	34.682	-1.90016
Ailanthus altissima	33.43	-5.2275
Ailanthus altissima	33.7629	-5.48567
Ailanthus altissima	33.881	-5.55781
Ailanthus altissima	33.8798	-5.5587
Ailanthus altissima	31.6242	-7.94706
Aloe vera	34.0027	-6.84479
Aloe vera	31.6431	-8.00323
Aloe vera	30.3236	-5.82499
Aloe vera	30.4269	-9.59712
Amaranthus albus	31.5317	-8.06544
Amaranthus albus	31.5199	-7.90224
Amaranthus albus	33.217	-8.04059
Amaranthus albus	32.4553	-7.63639
Amaranthus albus	32.335	-6.357
Amaranthus albus	35.03	-4.15
Amaranthus albus	35.1715	-4.98546
Amaranthus albus	34.873	-4.618
Amaranthus albus	34.8287	-3.01111
Amaranthus albus	34.6787	-2.9711
Amaranthus albus	35.1587	-4.98115
Amaranthus albus	35.1087	-5.28115
Amaranthus albus	35.1667	-4.98333
Amaranthus blitoides	32.3173	-6.49992
Amaranthus blitoides	34.5542	-1.85636
Amaranthus blitoides	33.8429	-5.47518
Amaranthus blitoides	33.2953	-8.22556
Amaranthus blitoides	33.5581	-7.27649
Amaranthus blitoides	33.1492	-8.41083
Amaranthus blitoides	35.1697	-5.25842
Amaranthus blitoides	33.5	-7.83333
Amaranthus blitoides	32.1558	-7.02417
Amaranthus blitoides	32.1558	-7.02417
Amaranthus blitoides	35.68	-5.33
Amaranthus blitoides	35.2156	-6.12793
Amaranthus blitoides	34.714	-5.99749
Amaranthus blitoides	35.32	-2.98
Amaranthus blitoides	34.146	-4.01273
Amaranthus blitoides	35.8239	-5.64917
Amaranthus blitoides	35.4265	-5.11737
Amaranthus blitoides	34.02	-4.62
Amaranthus blitoides	34.8787	-2.8711
Amaranthus blitoides	34.8187	-2.6711
Amaranthus blitoides	35.4287	-5.11115
Amaranthus blitoides	35.2487	-5.29115
Amaranthus blitoides	35.4333	-5.11667
Amaranthus blitoides	34.2833	-3.96667
Amaranthus blitoides	34.6833	-3.51667
Amaranthus blitoides	35.3167	-2.98333
Amaranthus blitoides	35.6833	-5.33333
Amaranthus blitoides	35.8333	-5.65
Amaranthus blitum	35.7996	-5.56506
Amaranthus blitum	35.7888	-5.5022
Amaranthus deflexus	31.4417	-9.67554
Amaranthus deflexus	34.7182	-1.91551
Amaranthus deflexus	35.2077	-4.66739
Amaranthus deflexus	35.1587	-6.09117
Amaranthus deflexus	35.4087	-5.09115
Amaranthus deflexus	35.1587	-6.09117
Amaranthus deflexus	35.4087	-5.10115
Amaranthus deflexus	35.2687	-5.25115
Amaranthus deflexus	35.1987	-5.31115
Amaranthus deflexus	35.4167	-5.1
Amaranthus deflexus	31.3673	-7.79182
Amaranthus hybridus	34.9446	-2.73129
Amaranthus hybridus	32.1558	-7.02417
Amaranthus hybridus	32.1558	-7.02417
Amaranthus hybridus	32.1558	-7.02417
Amaranthus hybridus	32.1558	-7.02417
Amaranthus hybridus	35.1	-5.27
Amaranthus hybridus	34.9938	-6.20639
Amaranthus hybridus	35.2156	-6.12793
Amaranthus hybridus	34.9938	-6.20639
Amaranthus hybridus	34.1477	-4.01067
Amaranthus hybridus	34.1474	-4.01102
Amaranthus hybridus	34.1474	-4.01102
Amaranthus hybridus	35.0728	-6.0912
Amaranthus hybridus	34.873	-4.618
Amaranthus hybridus	35.1087	-5.28115
Amaranthus hybridus	35.3667	-5.03333
Amaranthus hybridus	35.4333	-5.11667
Amaranthus hypochondriacus	35.25	-5.28333
Amaranthus hypochondriacus	31.3673	-7.79182
Amaranthus muricatus	33.6035	-7.63178
Amaranthus muricatus	33.6045	-7.61933
Amaranthus muricatus	33.5917	-7.62377
Amaranthus muricatus	33.5941	-7.63444
Amaranthus muricatus	33.5941	-7.63444
Amaranthus muricatus	29.8839	-9.5825
Amaranthus muricatus	30.85	-8.38333
Amaranthus muricatus	29.13	-10.03
Amaranthus powellii	35.1387	-5.11115
Amaranthus powellii	35.3587	-5.03115
Amaranthus powellii	35.4287	-5.12115
Amaranthus powellii	35.2487	-5.28115
Amaranthus powellii	35.0987	-5.26115
Amaranthus powellii	35.1487	-5.11115
Amaranthus powellii	35.4287	-5.11115
Amaranthus powellii	35.0987	-5.26115
Amaranthus powellii	35.3587	-5.03115
Amaranthus powellii	35.2487	-5.28115
Amaranthus powellii	35.15	-5.11667
Amaranthus retroflexus	33.8967	-5.6239
Amaranthus retroflexus	35.2156	-6.12793
Amaranthus retroflexus	35.8	-5.56667
Amaranthus viridis	33.5262	-5.11515
Amaranthus viridis	31.7484	-7.96836
Amaranthus viridis	30.9238	-6.93063
Amaranthus viridis	34.412	-2.90625
Amaranthus viridis	31.6359	-8.01704
Amaranthus viridis	34.43	-2.88
Amaranthus viridis	34.059	-5.52098
Amaranthus viridis	34.3151	-6.48395
Amaranthus viridis	35.2156	-6.12793
Amaranthus viridis	35.68	-5.33
Amaranthus viridis	35.7996	-5.56506
Amaranthus viridis	35.2077	-4.66739
Amaranthus viridis	35.8239	-5.64917
Amaranthus viridis	35.29	-2.986
Amaranthus viridis	35.28	-2.94
Amaranthus viridis	35.28	-2.94
Amaranthus viridis	35.28	-2.94
Amaranthus viridis	35.28	-2.94
Amaranthus viridis	35.28	-2.94
Amaranthus viridis	35.28	-2.94
Amaranthus viridis	35.0787	-2.21109
Amaranthus viridis	34.3087	-3.2811
Amaranthus viridis	33.9833	-5.58333
Arctotheca calendula	34.0045	-6.44906
Arctotheca calendula	33.5865	-7.68762
Arctotheca calendula	33.607	-7.65238
Arctotheca calendula	35.7654	-5.93517
Arctotheca calendula	33.5267	-7.80559
Arctotheca calendula	35.4672	-6.03873
Arctotheca calendula	29.7494	-8.96026
Arctotheca calendula	35.7649	-5.9358
Arctotheca calendula	35.7794	-5.80059
Arctotheca calendula	33.6087	-7.62945
Arctotheca calendula	35.2387	-5.17641
Arctotheca calendula	33.8467	-7.09922
Arctotheca calendula	35.26	-2.91965
Arctotheca calendula	35.7843	-5.81674
Arctotheca calendula	35.7906	-5.81674
Arctotheca calendula	33.752	-6.18487
Arctotheca calendula	35.7796	-5.79812
Arctotheca calendula	34.4137	-2.88609
Arctotheca calendula	34.8699	-6.27985
Arctotheca calendula	34.0108	-6.85011
Arctotheca calendula	33.5105	-7.83464
Arctotheca calendula	35.4331	-6.0428
Arctotheca calendula	34.8699	-6.27985
Arctotheca calendula	35.5744	-5.98863
Arctotheca calendula	34.0298	-6.82866
Arctotheca calendula	34.0306	-6.83059
Arctotheca calendula	35.7802	-5.80112
Arctotheca calendula	35.4646	-6.03087
Arctotheca calendula	34.8509	-6.2953
Arctotheca calendula	33.9672	-6.88952
Arctotheca calendula	34.24	-5.75832
Arctotheca calendula	33.9634	-6.86776
Arctotheca calendula	33.8158	-6.92788
Arctotheca calendula	34.2469	-6.68028
Arctotheca calendula	33.9897	-6.4524
Arctotheca calendula	34.8868	-6.29419
Arctotheca calendula	34.876	-6.29391
Arctotheca calendula	33.7307	-5.02348
Arctotheca calendula	34.221	-6.64914
Arctotheca calendula	35.4726	-6.0281
Arctotheca calendula	33.9299	-6.82906
Arctotheca calendula	33.5463	-7.75952
Arctotheca calendula	33.5452	-7.75852
Arctotheca calendula	33.5457	-7.75938
Arctotheca calendula	33.9272	-6.96059
Arctotheca calendula	33.544	-7.76652
Arctotheca calendula	33.4739	-7.7868
Arctotheca calendula	33.4934	-7.90642
Arctotheca calendula	33.4736	-7.7874
Arctotheca calendula	34.2512	-6.66602
Arctotheca calendula	33.9299	-6.82906
Arctotheca calendula	34.2479	-6.68044
Arctotheca calendula	35.0999	-2.28766
Arctotheca calendula	34.0269	-6.83001
Arctotheca calendula	34.0099	-6.84709
Arctotheca calendula	31.4835	-9.76694
Arctotheca calendula	34.2634	-6.63211
Arctotheca calendula	33.8964	-6.83223
Arctotheca calendula	33.5362	-7.79408
Arctotheca calendula	33.5581	-7.57917
Arctotheca calendula	33.9339	-6.82237
Arctotheca calendula	34.2616	-6.5824
Arctotheca calendula	35.7535	-5.34929
Arctotheca calendula	33.9587	-6.84502
Arctotheca calendula	33.3055	-8.35774
Arctotheca calendula	33.3102	-8.35031
Arctotheca calendula	34.2476	-6.68179
Arctotheca calendula	33.972	-6.86807
Arctotheca calendula	33.8858	-7.01806
Arctotheca calendula	33.5457	-7.75925
Arctotheca calendula	33.5457	-7.7594
Arctotheca calendula	33.5456	-7.75933
Arctotheca calendula	33.9472	-6.93375
Arctotheca calendula	34.296	-6.49281
Arctotheca calendula	34.2946	-6.48796
Arctotheca calendula	33.985	-6.86213
Arctotheca calendula	34.1064	-6.34515
Arctotheca calendula	33.9757	-6.89902
Arctotheca calendula	35.4639	-6.04203
Arctotheca calendula	35.4126	-5.06836
Arctotheca calendula	33.4792	-7.96025
Arctotheca calendula	34.21	-6.37
Arctotheca calendula	35.4599	-5.0966
Arctotheca calendula	35.1474	-4.36008
Arctotheca calendula	35.7751	-5.78138
Arctotheca calendula	33.9502	-6.84841
Arctotheca calendula	33.9614	-6.885
Arctotheca calendula	33.9329	-6.82562
Arctotheca calendula	33.9614	-6.885
Arctotheca calendula	33.9614	-6.885
Arctotheca calendula	35.4729	-6.02776
Arctotheca calendula	35.4729	-6.02776
Arctotheca calendula	33.9152	-6.85141
Arctotheca calendula	33.9152	-6.85141
Arctotheca calendula	34.0186	-6.83954
Arctotheca calendula	34.0462	-6.83007
Arctotheca calendula	35.7766	-5.79379
Arctotheca calendula	34.0167	-6.3
Arctotheca calendula	35.8	-5.35
Arctotheca calendula	35.9167	-5.46667
Arctotheca calendula	35.9167	-5.46667
Arctotheca calendula	34.2387	-6.53116
Arctotheca calendula	35.4387	-5.09115
Arctotheca calendula	35.9087	-5.46117
Arctotheca calendula	35.7987	-5.35116
Arctotheca calendula	35.7287	-5.35116
Arctotheca calendula	35.1787	-5.25115
Arctotheca calendula	35.4487	-5.10115
Arctotheca calendula	35.0787	-5.45115
Arctotheca calendula	35.8	-5.35
Arctotheca calendula	34.8742	-6.2542
Arundo donax	30.5595	-9.54617
Arundo donax	30.5887	-9.52618
Arundo donax	34.0735	-5.553
Arundo donax	34.0539	-5.53255
Arundo donax	34.0735	-5.5531
Arundo donax	34.0542	-5.52012
Arundo donax	34.0735	-5.55304
Arundo donax	35.2372	-5.17633
Arundo donax	31	-8.15637
Arundo donax	30.4188	-9.6035
Arundo donax	31.6031	-8.01406
Arundo donax	31.657	-8.07723
Arundo donax	30.5786	-7.15624
Arundo donax	31.5106	-9.7661
Arundo donax	31.3622	-7.94835
Arundo donax	32.0161	-6.71865
Arundo donax	30.0721	-9.65756
Arundo donax	33.61	-7.65052
Arundo donax	31.4445	-5.45244
Arundo donax	31.5485	-7.60104
Arundo donax	31.5833	-5.59135
Arundo donax	31.3626	-4.73879
Arundo donax	31.449	-5.97015
Arundo donax	33.6074	-7.6522
Arundo donax	33.6033	-7.62816
Arundo donax	33.599	-7.66037
Arundo donax	31.1717	-6.5042
Arundo donax	33.607	-7.65009
Arundo donax	33.6037	-7.65979
Arundo donax	33.9569	-6.85335
Arundo donax	33.9309	-5.56339
Arundo donax	35.1701	-5.25691
Arundo donax	30.5052	-9.67293
Arundo donax	31.0465	-7.131
Arundo donax	30.4734	-7.74061
Arundo donax	30.6669	-6.31302
Arundo donax	31.5747	-5.89176
Arundo donax	31.0516	-7.17902
Arundo donax	31.1313	-7.12494
Arundo donax	30.9903	-7.2045
Arundo donax	31.2891	-7.96138
Arundo donax	31.2891	-7.96138
Arundo donax	31.4477	-7.43326
Arundo donax	30.9364	-7.3257
Arundo donax	34.0328	-6.83598
Arundo donax	34.0329	-6.83601
Arundo donax	31.2517	-7.28108
Arundo donax	30.8233	-7.34417
Arundo donax	29.3416	-10.1994
Arundo donax	31.1697	-7.10223
Arundo donax	31.6581	-7.97271
Arundo donax	29.5844	-8.90139
Arundo donax	29.7508	-9.24189
Arundo donax	30.5879	-9.52797
Arundo donax	35.7905	-5.92372
Arundo donax	30.5888	-9.52792
Arundo donax	35.1664	-5.25498
Arundo donax	31.1674	-8.04344
Arundo donax	31.2072	-7.25683
Arundo donax	31.413	-9.58883
Arundo donax	33.9011	-5.54591
Arundo donax	31.1956	-6.20616
Arundo donax	30.9244	-6.90764
Arundo donax	34.035	-5.00265
Arundo donax	34.0324	-5.0307
Arundo donax	29.7249	-8.973
Arundo donax	34.0582	-4.9825
Arundo donax	34.9265	-2.71443
Arundo donax	31.1454	-7.41827
Arundo donax	31.1456	-7.41748
Arundo donax	31.5698	-5.58281
Arundo donax	35.4521	-5.39772
Arundo donax	31.5261	-5.53277
Arundo donax	31.5283	-5.52893
Arundo donax	34.0557	-4.97474
Arundo donax	32.1568	-4.37446
Arundo donax	33.9223	-6.92535
Arundo donax	33.982	-6.87158
Arundo donax	33.9053	-6.94401
Arundo donax	33.5542	-7.67164
Arundo donax	31.0983	-3.95034
Arundo donax	34.0433	-5.06149
Arundo donax	34.0499	-4.99175
Arundo donax	34.0499	-4.99175
Arundo donax	31.6481	-8.02041
Arundo donax	31.6719	-7.93438
Arundo donax	35.0484	-2.21897
Arundo donax	32.7264	-9.04684
Arundo donax	31.5905	-9.24228
Arundo donax	35.4638	-6.03784
Arundo donax	31.6054	-7.82463
Arundo donax	34.8484	-4.99111
Arundo donax	32.2498	-3.96749
Arundo donax	33.2902	-8.34734
Arundo donax	32.0177	-6.72414
Arundo donax	32.0161	-6.72128
Arundo donax	32.0151	-6.71951
Arundo donax	31.17	-8.0661
Arundo donax	35.624	-5.29442
Arundo donax	32.4068	-4.15806
Arundo donax	34	-6.67163
Arundo donax	33.6878	-7.40374
Arundo donax	34.08	-4.91617
Arundo donax	29.8856	-9.22349
Arundo donax	32.9974	-8.72592
Arundo donax	31.6761	-7.96598
Arundo donax	34.0054	-6.82095
Arundo donax	31.5442	-5.51688
Arundo donax	34.6397	-4.28027
Arundo donax	33.5776	-7.29495
Arundo donax	35.1896	-2.83786
Arundo donax	35.7903	-5.92399
Arundo donax	34.0236	-4.98865
Arundo donax	35.7584	-5.82124
Arundo donax	35.6968	-5.81223
Arundo donax	34.0524	-5.53423
Arundo donax	34.0729	-5.55493
Arundo donax	31.0458	-7.12737
Arundo donax	31.2263	-7.26337
Arundo donax	32.337	-6.34258
Arundo donax	31.1181	-7.04997
Arundo donax	31.166	-7.18913
Arundo donax	31.181	-7.11411
Arundo donax	32.0112	-6.64245
Arundo donax	32.0314	-6.66707
Arundo donax	32.1454	-6.61718
Arundo donax	32.1021	-6.61791
Arundo donax	35.1697	-5.25731
Arundo donax	31.5102	-8.01661
Arundo donax	31.5367	-7.50091
Arundo donax	29.3183	-10.1336
Arundo donax	34.007	-6.81973
Arundo donax	34.6096	-4.78996
Arundo donax	32.1	-4.3833
Arundo donax	34.0708	-5.53642
Arundo donax	34.8333	-2.68333
Arundo donax	35.5468	-5.2347
Arundo donax	31.6344	-8.00016
Arundo donax	28.1	-9.35
Arundo donax	34.5587	-3.0211
Arundo donax	34.3087	-3.2811
Arundo donax	35.5387	-5.37116
Arundo donax	35.7987	-5.60117
Arundo donax	34.8087	-5.35115
Arundo donax	32.0387	-3.05107
Arundo donax	34.6087	-4.79113
Arundo donax	35.2687	-5.25115
Arundo donax	35.4087	-5.11115
Arundo donax	35.2487	-5.05115
Arundo donax	35.0887	-5.46115
Arundo donax	35.4487	-5.15115
Arundo donax	35.7187	-5.38116
Arundo donax	34.0187	-6.73116
Arundo donax	35.4167	-5.11667
Arundo donax	35.25	-5.05
Asclepias curassavica	33.608	-7.63277
Asclepias curassavica	33.592	-7.62423
Asclepias curassavica	30.6261	-8.15206
Asclepias curassavica	30.6965	-8.1543
Asclepias curassavica	32.7394	-9.02343
Asclepias curassavica	34.0073	-6.81956
Asclepias curassavica	34.4042	-2.86964
Asclepias curassavica	30.6894	-8.14369
Asclepias curassavica	30.3969	-8.69393
Asclepias curassavica	30.3924	-8.6988
Asclepias curassavica	29.7642	-8.95806
Asclepias curassavica	34.0059	-6.82039
Asclepias curassavica	33.9354	-6.77985
Asclepias curassavica	35.9085	-5.40069
Asclepias curassavica	34.1732	-5.99432
Asclepias curassavica	30.564	-8.70214
Asclepias curassavica	31.5197	-7.90219
Asclepias curassavica	31.5195	-7.90202
Asclepias curassavica	34.0186	-6.81698
Asclepias curassavica	30.3747	-9.32111
Asclepias curassavica	33.9894	-6.82704
Asclepias curassavica	34.0113	-6.84908
Asclepias curassavica	34.2221	-6.66951
Asclepias curassavica	34.0078	-6.80379
Asclepias curassavica	35.0999	-2.28766
Asclepias curassavica	34.0061	-6.82027
Asclepias curassavica	34.258	-6.6719
Asclepias curassavica	33.5536	-7.63796
Asclepias curassavica	35.0999	-2.28766
Asclepias curassavica	35.0999	-2.28766
Asclepias curassavica	33.9534	-6.89531
Asclepias curassavica	34.0112	-6.84929
Asclepias curassavica	33.9842	-5.05305
Asclepias curassavica	33.9534	-6.89531
Asclepias curassavica	30.7541	-8.76254
Asclepias curassavica	34.0138	-6.78511
Asclepias curassavica	34.0061	-6.82025
Asclepias curassavica	35.7809	-5.76571
Asclepias curassavica	34.0139	-6.78293
Asclepias curassavica	34.491	-5.5135
Asclepias curassavica	33.9895	-6.82706
Asclepias curassavica	30.4149	-9.60091
Asclepias curassavica	30.4149	-9.60091
Asclepias curassavica	34.0164	-6.8193
Asclepias curassavica	32.3311	-6.33839
Asclepias curassavica	30.4273	-9.59226
Asclepias curassavica	33.9103	-5.50738
Asclepias curassavica	30.0833	-8.15
Asclepias curassavica	29.9167	-9.66666
Asclepias curassavica	35.9094	-5.38722
Atriplex canescens	33.571	-7.6021
Atriplex nummularia	30.62	-8.09222
Atriplex nummularia	31.4539	-4.23917
Atriplex semibaccata	30.0035	-9.64707
Atriplex semibaccata	31.5486	-7.60061
Atriplex semibaccata	28.9567	-10.1139
Atriplex semibaccata	28.9113	-10.1653
Atriplex semibaccata	29.9454	-9.63989
Atriplex semibaccata	30.9887	-9.0413
Atriplex semibaccata	31.5315	-9.59736
Atriplex semibaccata	33.3749	-7.58036
Atriplex semibaccata	33.3756	-7.57727
Atriplex semibaccata	33.3764	-7.57908
Atriplex semibaccata	33.3755	-7.57561
Atriplex semibaccata	33.3751	-7.57679
Atriplex semibaccata	31.4701	-9.77055
Atriplex semibaccata	31.3255	-7.76031
Atriplex semibaccata	32.3769	-3.66354
Atriplex semibaccata	29.1754	-10.0931
Atriplex semibaccata	30.5075	-9.68569
Atriplex semibaccata	30.3492	-9.56692
Atriplex semibaccata	30.3492	-9.56692
Atriplex semibaccata	33.0246	-4.06811
Atriplex semibaccata	31.0694	-6.5781
Atriplex semibaccata	31.6061	-7.82487
Atriplex semibaccata	34.682	-1.90016
Atriplex semibaccata	34.0171	-6.85032
Atriplex semibaccata	34.0177	-6.85715
Atriplex semibaccata	34.0215	-3.24654
Atriplex semibaccata	32.0021	-8.09976
Atriplex semibaccata	31.5613	-8.47444
Atriplex semibaccata	31.5668	-8.47981
Atriplex semibaccata	32.1515	-7.24645
Atriplex semibaccata	30.3772	-9.44976
Atriplex semibaccata	31.0941	-9.81807
Atriplex semibaccata	31.6453	-7.83139
Atriplex semibaccata	32.053	-7.78813
Atriplex semibaccata	31.9533	-7.10806
Atriplex semibaccata	31.9533	-7.10806
Atriplex semibaccata	30.4246	-9.6092
Atriplex semibaccata	34.54	-3.02
Atriplex semibaccata	29.6275	-10.0003
Atriplex semibaccata	29.3642	-10.1872
Atriplex semibaccata	29.3585	-10.1857
Atriplex semibaccata	34.2529	-3.30683
Atriplex semibaccata	31.5464	-7.6572
Atriplex semibaccata	30.5331	-7.91111
Atriplex semibaccata	30.5331	-7.91111
Atriplex semibaccata	30.4906	-9.67139
Atriplex semibaccata	29.8839	-9.5825
Atriplex semibaccata	28.77	-9.43
Atriplex semibaccata	34.9333	-2.71667
Atriplex semibaccata	31.8	-8.5
Atriplex semibaccata	30.4208	-9.59778
Atriplex semibaccata	30.4208	-9.59778
Atriplex semibaccata	34.7487	-1.93108
Atriplex semibaccata	34.3087	-3.2811
Atriplex semibaccata	34.8787	-2.8711
Atriplex semibaccata	35.1187	-2.3211
Atriplex semibaccata	34.8787	-2.8711
Atriplex semibaccata	35.1187	-2.3411
Atriplex semibaccata	34.4387	-3.35111
Atriplex semibaccata	35.0587	-2.21109
Atriplex semibaccata	35.11	-4.18103
Atriplex semibaccata	31.6294	-7.97213
Atriplex suberecta	30.9137	-6.85081
Atriplex suberecta	30.9114	-6.86061
Atriplex suberecta	30.8654	-6.84703
Atriplex suberecta	29.1748	-10.0929
Atriplex suberecta	28.9725	-10.0474
Atriplex suberecta	31.8841	-4.35595
Atriplex suberecta	35.2563	-2.92509
Atriplex suberecta	31.6352	-7.98279
Atriplex suberecta	28.5492	-9.34222
Atriplex suberecta	34.8743	-2.7095
Atriplex suberecta	34.7487	-1.93108
Azolla filiculoides	34.1397	-6.60052
Azolla filiculoides	33.6487	-7.11116
Bassia indica	33.5561	-3.62606
Bassia indica	30.5052	-8.71884
Bassia scoparia	34.4144	-2.91979
Bassia scoparia	35.2208	-3.23561
Bassia scoparia	35.7723	-5.79546
Bassia scoparia	35.7723	-5.79546
Bassia scoparia	35.7723	-5.79546
Bassia scoparia	35.7723	-5.79546
Bassia scoparia	30.2615	-5.68237
Bassia scoparia	34.7487	-1.93108
Bassia scoparia	31.6199	-7.9792
Bidens aurea	31.5244	-5.52703
Bidens aurea	35.1699	-5.25699
Bidens aurea	31.0399	-6.60186
Bidens aurea	31.0398	-6.60183
Bidens aurea	31.0399	-6.60199
Bidens aurea	31.5161	-5.4467
Bidens aurea	31.1541	-7.84116
Bidens aurea	31.1542	-7.84009
Bidens aurea	33.1905	-3.85107
Bidens aurea	35.9108	-5.38454
Bidens aurea	35.1697	-5.25731
Bidens aurea	35.4123	-5.135
Bidens aurea	35.4265	-5.11737
Bidens aurea	35.4287	-5.11115
Bidens aurea	35.4087	-5.13115
Bidens aurea	35.4087	-5.10115
Bidens aurea	35.2187	-5.37115
Bidens aurea	35.4333	-5.11667
Bidens aurea	35.4167	-5.13333
Bidens aurea	35.4167	-5.1
Bidens pilosa	35.7884	-5.84125
Bidens pilosa	35.2385	-5.18051
Bidens pilosa	33.9984	-6.85268
Bidens pilosa	35.42	-5.08
Bidens pilosa	35.38	-5.17
Bidens pilosa	35.3084	-4.97867
Bidens pilosa	35.27	-5.25
Bidens pilosa	35.4123	-5.135
Bidens pilosa	35.0728	-6.0912
Bidens pilosa	33.9987	-6.86116
Bidens pilosa	35.5387	-5.37116
Bidens pilosa	34.0087	-6.78116
Bidens pilosa	35.3787	-5.16115
Bidens pilosa	35.2787	-5.23115
Bidens pilosa	35.2987	-4.96115
Bidens pilosa	35.4087	-5.08115
Bidens pilosa	35.2587	-5.25115
Bidens pilosa	35.4087	-5.13115
Bidens pilosa	35.3	-4.96667
Bidens pilosa	35.4167	-5.13333
Bidens pilosa	35.2833	-5.23333
Bidens pilosa	35.4167	-5.08333
Bidens pilosa	35.3833	-5.16667
Bidens pilosa	35.2667	-5.25
Bidens pilosa	35.4333	-5.11667
Bromus catharticus	33.5922	-7.62449
Bromus catharticus	35.7869	-5.81529
Bromus catharticus	35.787	-5.81527
Bromus catharticus	33.5903	-7.59261
Bromus catharticus	32.7909	-8.96124
Bromus catharticus	35.43	-5.08
Bromus catharticus	35.4287	-5.08115
Bromus catharticus	35.4333	-5.08333
Calendula officinalis	34.0727	-5.55306
Calendula officinalis	33.5451	-7.76075
Calendula officinalis	33.524	-7.82592
Calendula officinalis	33.5505	-7.74663
Calendula officinalis	34.0729	-5.55449
Calendula officinalis	34.0253	-4.99878
Calendula officinalis	34.0729	-5.55449
Calendula officinalis	35.4384	-5.10733
Calendula officinalis	33.8473	-5.99464
Calendula officinalis	34.8395	-2.35849
Calendula officinalis	34.0303	-4.80088
Calendula officinalis	35.4333	-5.1
Carpobrotus acinaciformis	32.0132	-6.71926
Carpobrotus acinaciformis	34.3876	-2.90225
Carpobrotus acinaciformis	31.7895	-7.03959
Carpobrotus acinaciformis	35.2055	-6.14778
Carpobrotus acinaciformis	33.608	-7.6498
Carpobrotus acinaciformis	31.0468	-7.13036
Carpobrotus acinaciformis	31.8646	-6.93752
Carpobrotus acinaciformis	32.2718	-7.96889
Carpobrotus acinaciformis	30.5121	-9.68734
Carpobrotus acinaciformis	34.0315	-6.83883
Carpobrotus acinaciformis	33.9546	-6.89359
Carpobrotus acinaciformis	30.5497	-9.73236
Carpobrotus acinaciformis	33.5996	-7.66593
Carpobrotus acinaciformis	33.5874	-7.68543
Carpobrotus acinaciformis	33.5996	-7.66596
Carpobrotus acinaciformis	35.783	-5.93058
Carpobrotus acinaciformis	30.1215	-9.65416
Carpobrotus acinaciformis	35.1479	-4.36619
Carpobrotus acinaciformis	33.9824	-6.84534
Carpobrotus acinaciformis	33.6097	-7.62646
Carpobrotus acinaciformis	33.4079	-7.54462
Carpobrotus acinaciformis	33.582	-7.70144
Carpobrotus acinaciformis	29.4797	-10.1282
Carpobrotus acinaciformis	33.609	-7.62748
Carpobrotus acinaciformis	33.609	-7.62742
Carpobrotus acinaciformis	30.5153	-9.67805
Carpobrotus acinaciformis	33.2829	-8.38754
Carpobrotus acinaciformis	33.9707	-6.90923
Carpobrotus acinaciformis	29.7504	-8.9599
Carpobrotus acinaciformis	33.565	-7.65556
Carpobrotus acinaciformis	33.6635	-7.39511
Carpobrotus acinaciformis	35.8072	-5.35137
Carpobrotus acinaciformis	31.6756	-7.96737
Carpobrotus acinaciformis	30.9108	-9.07089
Carpobrotus acinaciformis	31.2409	-8.25857
Carpobrotus acinaciformis	33.4937	-7.90566
Carpobrotus acinaciformis	33.5429	-7.76405
Carpobrotus acinaciformis	31.4958	-9.75738
Carpobrotus acinaciformis	33.3117	-8.34865
Carpobrotus acinaciformis	34.6445	-6.40617
Carpobrotus acinaciformis	34.0316	-6.83556
Carpobrotus acinaciformis	31.7893	-7.03985
Carpobrotus acinaciformis	33.9687	-6.82509
Carpobrotus acinaciformis	33.8174	-6.10464
Carpobrotus acinaciformis	33.5564	-7.62737
Carpobrotus acinaciformis	33.8231	-7.14149
Chenopodium bonus-henricus	31.18	-7.85
Chenopodium bonus-henricus	31.1906	-7.8519
Chenopodium giganteum	33.5865	-7.62331
Chenopodium giganteum	31.3137	-7.96001
Chenopodium giganteum	33.528	-7.81773
Chenopodium giganteum	33.5253	-7.80559
Chenopodium giganteum	35.4624	-5.7882
Chenopodium giganteum	33.6095	-7.62703
Chenopodium giganteum	31.2898	-7.96173
Chenopodium giganteum	31.2892	-7.96138
Chenopodium giganteum	33.3059	-8.1344
Chenopodium giganteum	33.9956	-3.27961
Chenopodium giganteum	29.9714	-9.64
Chenopodium giganteum	35.2077	-4.66739
Chenopodium giganteum	35.2077	-4.66739
Chloris gayana	30.4503	-8.8708
Chloris gayana	34.8787	-2.5611
Colocasia esculenta	30.3889	-9.48351
Colocasia esculenta	30.3888	-9.48355
Colocasia esculenta	30.3889	-9.48355
Colocasia esculenta	34.0059	-6.82033
Colocasia esculenta	35.7802	-5.86415
Colocasia esculenta	33.913	-5.57131
Colocasia esculenta	34.0055	-6.82067
Colocasia esculenta	34.0067	-6.81973
Colocasia esculenta	34.0963	-6.76889
Colocasia esculenta	33.9889	-6.79874
Coriandrum sativum	31.6227	-8.00718
Coriandrum sativum	31.0928	-4.01767
Coriandrum sativum	31.1399	-4.02072
Coriandrum sativum	30.257	-5.67587
Coriandrum sativum	33.5944	-7.63458
Coriandrum sativum	35.1189	-3.33291
Coriandrum sativum	30.9213	-6.9109
Coriandrum sativum	33.4741	-7.64838
Coriandrum sativum	30.0927	-8.46157
Coriandrum sativum	33.8728	-5.58276
Coriandrum sativum	34.411	-3.97803
Coriandrum sativum	31.5767	-5.58506
Coriandrum sativum	33.7135	-7.34709
Coriandrum sativum	33.5524	-7.37276
Coriandrum sativum	33.7804	-6.86617
Coriandrum sativum	30.9214	-6.90951
Coriandrum sativum	35.8202	-5.7241
Coriandrum sativum	34.2338	-3.34955
Coriandrum sativum	34.0254	-4.88309
Coriandrum sativum	28.9411	-9.95306
Coriandrum sativum	28.941	-9.95319
Coriandrum sativum	34.9938	-2.33051
Coriandrum sativum	31.6567	-8.08111
Coriandrum sativum	34.6	-3.46
Coriandrum sativum	35.17	-5.27
Coriandrum sativum	34.7866	-5.37842
Coriandrum sativum	30.68	-8.85
Coriandrum sativum	34.1083	-4.0067
Coriandrum sativum	34.1477	-4.01067
Coriandrum sativum	34.02	-4.62
Coriandrum sativum	32.3833	-8.633
Coriandrum sativum	32.1053	-9.08361
Coriandrum sativum	35.6281	-5.28611
Coriandrum sativum	33.5667	-7.66667
Coriandrum sativum	35.0018	-3.7232
Coriandrum sativum	35.32	-2.98
Coriandrum sativum	35.5667	-5.3667
Coriandrum sativum	34.0167	-4.61667
Coriandrum sativum	34.15	-4.01667
Coriandrum sativum	35.1587	-5.26115
Coriandrum sativum	35.1587	-5.26115
Coriandrum sativum	35.1667	-5.26667
Coriandrum sativum	35.7667	-5.9167
Coriandrum sativum	30.8833	-9.7
Coriandrum sativum	31.6667	-7.15
Coriandrum sativum	31.5	-7.5
Cortaderia selloana	33.952	-6.89743
Cortaderia selloana	34.6155	-2.44028
Cortaderia selloana	34.0581	-4.98615
Cortaderia selloana	35.3881	-6.06724
Cortaderia selloana	33.9293	-6.82656
Cortaderia selloana	33.4794	-7.61867
Cortaderia selloana	33.9556	-6.89417
Cortaderia selloana	33.4836	-7.62938
Cortaderia selloana	35.7854	-5.84633
Cortaderia selloana	33.9645	-6.84778
Cortaderia selloana	31.6024	-8.00622
Cotula coronopifolia	33.53	-6.95
Cotula coronopifolia	34.8742	-6.2542
Cotula coronopifolia	34.01	-6.7
Cotula coronopifolia	34.01	-6.7
Cotula coronopifolia	35.8	-5.35
Cotula coronopifolia	35.42	-5.12
Cotula coronopifolia	35.83	-5.35
Cotula coronopifolia	35.6281	-5.28611
Cotula coronopifolia	35.6281	-5.28611
Cotula coronopifolia	35.6281	-5.28611
Cotula coronopifolia	35.6281	-5.28611
Cotula coronopifolia	35.6281	-5.28611
Cotula coronopifolia	35.6281	-5.28611
Cotula coronopifolia	35.6281	-5.28611
Cotula coronopifolia	35.6281	-5.28611
Cotula coronopifolia	35.6281	-5.28611
Cotula coronopifolia	35.7417	-5.3715
Cotula coronopifolia	35.69	-5.62
Cotula coronopifolia	35.7888	-5.5022
Cotula coronopifolia	35.6765	-5.3238
Cotula coronopifolia	35.5597	-5.3667
Cotula coronopifolia	35.8087	-5.38116
Cotula coronopifolia	35.4087	-5.11115
Cotula coronopifolia	35.4087	-5.11115
Cotula coronopifolia	35.7987	-5.71117
Cotula coronopifolia	35.7187	-5.38116
Cotula coronopifolia	35.7187	-5.38116
Cotula coronopifolia	34.7187	-6.25116
Cotula coronopifolia	35.5387	-5.37116
Cotula coronopifolia	35.4167	-5.11667
Cotula coronopifolia	35.4167	-5.11667
Cotula coronopifolia	35.8	-5.35
Cotula coronopifolia	34.7167	-6.25
Cyanus segetum	33.0023	-5.0703
Cyperus difformis	35.171	-6.0896
Dysphania multifida	35.1715	-4.98546
Dysphania multifida	35.1715	-4.98546
Dysphania multifida	35.23	-2.96
Dysphania multifida	35.23	-2.96
Dysphania multifida	35.23	-2.96
Dysphania multifida	34.9373	-4.3085
Dysphania multifida	34.93	-4.32
Dysphania multifida	35.2487	-5.28115
Dysphania multifida	35.1587	-4.98115
Dysphania multifida	35.1587	-4.98115
Dysphania multifida	35.2687	-5.25115
Dysphania multifida	35.2487	-5.28115
Eclipta prostrata	35.42	-5.1
Eclipta prostrata	35.68	-5.33
Eclipta prostrata	35.2156	-6.12793
Eclipta prostrata	34.48	-6.37
Eclipta prostrata	35.2167	-6.13333
Eclipta prostrata	35.4087	-5.10115
Eclipta prostrata	35.1987	-5.31115
Eclipta prostrata	35.6833	-5.33333
Eclipta prostrata	34.4833	-6.36667
Eclipta prostrata	35.4167	-5.1
Eclipta prostrata	35.2167	-6.13333
Ehrharta erecta	35.7795	-5.81796
Ehrharta erecta	35.7886	-5.8395
Ehrharta erecta	34	-6.85
Ehrharta erecta	34.0027	-6.853
Ehrharta erecta	34.0044	-6.855
Ehrharta erecta	34.0044	-6.855
Ehrharta erecta	34.0044	-6.855
Ehrharta erecta	34	-6.85
Ehrharta erecta	33.9987	-6.86116
Eleusine indica	33.6046	-7.62124
Eleusine indica	33.5943	-7.5869
Eleusine indica	33.592	-7.58977
Eleusine indica	31.4464	-9.6505
Eleusine indica	29.9986	-9.58889
Eleusine indica	32.791	-8.96179
Eleusine indica	33.9987	-6.86116
Eleusine indica	34.3587	-6.17116
Eleusine indica	35.0887	-5.14115
Eleusine indica	35.0887	-5.25115
Erigeron bonariensis	31.5666	-5.58076
Erigeron bonariensis	33.8932	-5.5639
Erigeron bonariensis	33.3727	-7.56651
Erigeron bonariensis	31.6358	-8.01691
Erigeron bonariensis	33.2233	-7.57304
Erigeron bonariensis	33.256	-8.50092
Erigeron bonariensis	33.256	-8.50092
Erigeron bonariensis	35.5686	-5.36933
Erigeron bonariensis	34.2412	-6.671
Erigeron bonariensis	31.0441	-5.79115
Erigeron bonariensis	33.5627	-7.63961
Erigeron bonariensis	33.5629	-7.63963
Erigeron bonariensis	31.6334	-7.99837
Erigeron bonariensis	31.6294	-8.01762
Erigeron bonariensis	34.0582	-6.79333
Erigeron bonariensis	35.2	-6.13
Erigeron bonariensis	35.1667	-4.3
Erigeron bonariensis	35.2069	-4.6675
Erigeron bonariensis	35.2069	-4.6675
Erigeron bonariensis	35.2069	-4.6675
Erigeron bonariensis	35.2069	-4.6675
Erigeron bonariensis	35.2069	-4.6675
Erigeron bonariensis	33.9717	-6.84861
Erigeron bonariensis	33.9717	-6.84861
Erigeron bonariensis	33.9717	-6.84861
Erigeron bonariensis	30.4333	-9.01667
Erigeron bonariensis	30.4333	-9.01667
Erigeron bonariensis	30.4333	-9.01667
Erigeron bonariensis	30.4333	-9.01667
Erigeron bonariensis	35.17	-6.17
Erigeron bonariensis	35.19	-6.15
Erigeron bonariensis	34.8287	-2.8811
Erigeron bonariensis	34.5487	-3.0111
Erigeron bonariensis	35.3787	-5.16115
Erigeron bonariensis	35.0987	-5.26115
Erigeron bonariensis	35.2587	-5.22115
Erigeron bonariensis	35.0287	-5.48115
Erigeron bonariensis	35.4	-5.16667
Erigeron bonariensis	35.1	-5.26667
Erigeron bonariensis	35.3833	-5.16667
Erigeron bonariensis	35.0333	-4.15
Erigeron bonariensis	35.3167	-2.98333
Erigeron bonariensis	31.6199	-7.9792
Erigeron canadensis	32.337	-6.34258
Erigeron canadensis	34.0708	-5.53642
Erigeron canadensis	35.0728	-6.0912
Erigeron canadensis	35.2187	-5.37115
Erigeron karvinskianus	33.844	-5.59255
Erigeron sumatrensis	35.4287	-5.11115
Erigeron sumatrensis	35.3587	-5.03115
Erigeron sumatrensis	35.3087	-5.05115
Erigeron sumatrensis	35.2187	-5.37115
Gomphocarpus fruticosus	35.8759	-5.39902
Gomphocarpus fruticosus	35.2838	-5.23328
Gomphocarpus fruticosus	35.8997	-5.47436
Gomphocarpus fruticosus	35.2924	-5.2322
Gomphocarpus fruticosus	35.2924	-5.23217
Gomphocarpus fruticosus	35.28	-5.22
Gomphocarpus fruticosus	35.27	-5.25
Gomphocarpus fruticosus	35.2875	-5.2353
Gomphocarpus fruticosus	35.4033	-5.0925
Gomphocarpus fruticosus	35.55	-5.2333
Gomphocarpus fruticosus	35.4536	-5.09944
Gomphocarpus fruticosus	35.569	-5.3705
Gomphocarpus fruticosus	35.569	-5.3705
Gomphocarpus fruticosus	35.5893	-5.2883
Gomphocarpus fruticosus	35.57	-5.36
Gomphocarpus fruticosus	35.7888	-5.5022
Gomphocarpus fruticosus	35.5667	-5.3667
Gomphocarpus fruticosus	35.5667	-5.3667
Gomphocarpus fruticosus	32.0387	-3.05107
Gomphocarpus fruticosus	35.3587	-5.03115
Gomphocarpus fruticosus	35.2487	-5.05115
Gomphocarpus fruticosus	35.2587	-5.25115
Gomphocarpus fruticosus	35.4087	-5.11115
Gomphocarpus fruticosus	35.2787	-5.23115
Gomphocarpus fruticosus	35.2787	-5.21115
Gomphocarpus fruticosus	35.1787	-5.25115
Gomphocarpus fruticosus	35.2687	-5.25115
Gomphocarpus fruticosus	35.2887	-5.22115
Gomphocarpus fruticosus	35.2787	-5.27115
Gomphocarpus fruticosus	35.7187	-5.38116
Gomphocarpus fruticosus	35.7087	-5.49116
Gomphocarpus fruticosus	35.2667	-5.25
Gomphocarpus fruticosus	35.2833	-5.21667
Hedera helix	34.8566	-2.70465
Hedera helix	33.6275	-7.16274
Hedera helix	34.0313	-5.00449
Hedera helix	33.5377	-5.11403
Hedera helix	31.3069	-7.73633
Hedera helix	33.6162	-7.11388
Hedera helix	35.7804	-5.82139
Hedera helix	31.6309	-8.00925
Hedera helix	33.4342	-5.22487
Hedera helix	35.2691	-5.11821
Hedera helix	33.9948	-6.82431
Hedera helix	33.9944	-6.82451
Hedera helix	33.9948	-6.82431
Hedera helix	30.3903	-9.51396
Hedera helix	29.7942	-9.05573
Hedera helix	29.7942	-9.05573
Hedera helix	29.7942	-9.05573
Hedera helix	29.7942	-9.05573
Hedera helix	29.7942	-9.05573
Hedera helix	29.7942	-9.05573
Hedera helix	29.7942	-9.05573
Hedera helix	29.7942	-9.05573
Hedera helix	31.6231	-7.99552
Hedera helix	35.1	-5.13
Hedera helix	35.28	-5.12
Hedera helix	35.6922	-5.45694
Hedera helix	32.9124	-5.38872
Hedera helix	35.1257	-5.1417
Hedera helix	33.2853	-5.3362
Hedera helix	34.0181	-5.00785
Hedera helix	35.7869	-5.88222
Hedera helix	32.4656	-4.99833
Hedera helix	31.0816	-8.69995
Hedera helix	31.1008	-8.56361
Hedera helix	31.7321	-7.01146
Hedera helix	35.5387	-5.37116
Hedera helix	35.1987	-2.95111
Hedera helix	35.0887	-5.03115
Hedera helix	35.7987	-5.82117
Hedera helix	32.1987	-6.51113
Hedera helix	32.1987	-6.51113
Helianthus annuus	35.4463	-5.39327
Helianthus annuus	35.1776	-2.92598
Helianthus annuus	34.4128	-2.90379
Helianthus annuus	35.4462	-5.3933
Helianthus annuus	35.0999	-2.28766
Helianthus annuus	33.4916	-7.58977
Helianthus annuus	31.4501	-9.69876
Helianthus annuus	29.9684	-5.58761
Helianthus annuus	33.5931	-7.61639
Helianthus annuus	33.5931	-7.61639
Heliotropium curassavicum	35.2538	-2.92654
Heliotropium curassavicum	29.5836	-10.0315
Heliotropium curassavicum	35.2563	-2.92509
Iris albicans	33.8504	-4.86757
Iris albicans	34.682	-1.90016
Iris albicans	33.8195	-6.06977
Iris albicans	34.0333	-6.8
Iris albicans	34.2563	-6.67584
Iris albicans	34.2582	-6.67506
Iris albicans	31.8836	-6.31778
Iris lutescens	34.4116	-2.88791
Linum usitatissimum	33.9314	-6.82387
Linum usitatissimum	32.8672	-6.90139
Linum usitatissimum	32.8673	-6.90129
Linum usitatissimum	33.5189	-5.4275
Linum usitatissimum	35.7543	-5.91324
Linum usitatissimum	35.3215	-2.98513
Linum usitatissimum	34.0224	-6.83454
Linum usitatissimum	32.1053	-9.08361
Linum usitatissimum	35.071	-2.9383
Linum usitatissimum	35.07	-2.92
Linum usitatissimum	35.31	-2.95
Linum usitatissimum	35.2257	-4.9587
Linum usitatissimum	35.7873	-5.4682
Linum usitatissimum	35.7888	-5.5022
Linum usitatissimum	35.2687	-5.25115
Linum usitatissimum	34.2687	-6.56116
Linum usitatissimum	35.28	-2.94
Linum usitatissimum	31.5	-7.5
Linum usitatissimum	31.5	-7.5
Linum usitatissimum	31.5	-7.5
Linum usitatissimum	31.5	-7.5
Linum usitatissimum	31.5	-7.5
Lupinus albus	33.6423	-7.39985
Lupinus albus	33.5453	-7.21459
Lupinus albus	33.9282	-6.71278
Lupinus albus	34	-6.83333
Lupinus albus	35	-4.6
Lupinus albus	34	-6.83333
Lupinus luteus	33.637	-7.17277
Lupinus luteus	35.4693	-6.00468
Lupinus luteus	33.9894	-6.45066
Lupinus luteus	33.8084	-6.50099
Lupinus luteus	35.6755	-5.93764
Lupinus luteus	34.6009	-5.94067
Lupinus luteus	33.6089	-6.70952
Lupinus luteus	33.9936	-6.71662
Lupinus luteus	34.0023	-6.74053
Lupinus luteus	33.9458	-6.92882
Lupinus luteus	33.9458	-6.92882
Lupinus luteus	33.9458	-6.92882
Lupinus luteus	33.9458	-6.92882
Lupinus luteus	33.4217	-7.63189
Lupinus luteus	34.2494	-6.57944
Lupinus luteus	34.2	-6.36
Lupinus luteus	33.4426	-7.63815
Lupinus luteus	35.05	-6.17
Lupinus luteus	35.05	-6.07
Lupinus luteus	33.9333	-6.41667
Lupinus luteus	34.15	-5.13333
Lupinus luteus	34.25	-6.58333
Lupinus luteus	35.17	-6.17
Lupinus luteus	35.19	-6.15
Lupinus luteus	35.4428	-5.0913
Lupinus luteus	33.6233	-7.12056
Lupinus luteus	35.1748	-6.1428
Lupinus luteus	33.9333	-6.41667
Lupinus luteus	35.1687	-6.20117
Lupinus luteus	35.2687	-5.25115
Lupinus luteus	35.05	-6.06667
Lupinus luteus	33.93	-6.41
Lupinus luteus	33.9333	-6.41667
Malvastrum coromandelianum	34.5909	-6.38312
Medicago arborea	34.0541	-4.97
Medicago arborea	32.8333	-8.25
Medicago arborea	32.8333	-8.25
Medicago arborea	33.0333	-3.98333
Medicago arborea	33.0333	-3.98333
Medicago rotata	34	-6.83333
Medicago rotata	34	-6.83333
Medicago rotata	34	-6.83333
Melilotus albus	32.5005	-4.48414
Melilotus albus	35.45	-5.4
Melilotus albus	35.4087	-5.12115
Melilotus albus	35.4087	-5.11115
Melilotus albus	35.4167	-5.11667
Mesembryanthemum cordifolium	30.5877	-9.52846
Mesembryanthemum cordifolium	31.4537	-7.39699
Mesembryanthemum cordifolium	32.0155	-6.72059
Mesembryanthemum cordifolium	30.0721	-9.65756
Mesembryanthemum cordifolium	30.7052	-9.83213
Mesembryanthemum cordifolium	30.3838	-8.69888
Mesembryanthemum cordifolium	32.7343	-9.03685
Mesembryanthemum cordifolium	34.9256	-2.71496
Mesembryanthemum cordifolium	31.1971	-9.81595
Mesembryanthemum cordifolium	30.5878	-9.52798
Mesembryanthemum cordifolium	31.047	-7.1319
Mesembryanthemum cordifolium	32.0169	-6.72185
Mesembryanthemum cordifolium	35.3889	-3.00768
Mesembryanthemum cordifolium	30.9192	-6.89792
Mesembryanthemum cordifolium	30.9192	-6.89795
Mesembryanthemum cordifolium	31.4731	-7.41173
Mesembryanthemum cordifolium	29.7209	-8.97523
Mesembryanthemum cordifolium	33.8939	-5.56634
Mesembryanthemum cordifolium	31.1753	-8.0792
Mesembryanthemum cordifolium	35.1547	-3.00299
Mesembryanthemum cordifolium	34.6752	-1.9109
Mesembryanthemum cordifolium	33.7092	-7.36691
Mesembryanthemum cordifolium	33.6033	-7.66236
Mesembryanthemum cordifolium	31.4371	-9.74346
Mesembryanthemum cordifolium	31.508	-9.76604
Mesembryanthemum cordifolium	31.6297	-7.99091
Mesembryanthemum cordifolium	34.9255	-2.71511
Mesembryanthemum cordifolium	33.353	-7.98007
Mesembryanthemum cordifolium	33.6101	-7.54474
Mesembryanthemum cordifolium	31.5786	-5.58842
Mesembryanthemum cordifolium	35.1685	-4.28956
Mesembryanthemum cordifolium	30.6207	-9.515
Mesembryanthemum cordifolium	31.5381	-9.68745
Mesembryanthemum cordifolium	31.1455	-7.417
Mesembryanthemum cordifolium	31.1929	-7.77036
Mesembryanthemum cordifolium	28.9794	-10.0597
Mesembryanthemum cordifolium	33.2238	-7.57324
Mesembryanthemum cordifolium	34.682	-1.90016
Mesembryanthemum cordifolium	31.4492	-6.91069
Mesembryanthemum cordifolium	31.6833	-7.98931
Mesembryanthemum cordifolium	33.5231	-7.46676
Mesembryanthemum cordifolium	33.2348	-8.49998
Mesembryanthemum cordifolium	32.0188	-6.72187
Mesembryanthemum cordifolium	30.0557	-9.6882
Mesembryanthemum cordifolium	31.0476	-7.12913
Mesembryanthemum cordifolium	31.2198	-6.53429
Modiola caroliniana	35.8	-5.35
Modiola caroliniana	35.8	-5.35
Moluccella laevis	33.6057	-6.63211
Nicotiana glauca	30.5828	-9.75321
Nicotiana glauca	30.1323	-9.62275
Nicotiana glauca	30.3186	-9.53012
Nicotiana glauca	31.1141	-9.69131
Nicotiana glauca	30.1589	-9.63703
Nicotiana glauca	30.1927	-9.18523
Nicotiana glauca	31.6944	-7.99484
Nicotiana glauca	30.7531	-9.15403
Nicotiana glauca	31.6937	-7.99403
Nicotiana glauca	30.1363	-9.63837
Nicotiana glauca	30.756	-9.15249
Nicotiana glauca	30.5159	-9.66632
Nicotiana glauca	30.0697	-9.63829
Nicotiana glauca	31.4918	-9.7636
Nicotiana glauca	30.7624	-9.68138
Nicotiana glauca	31.3368	-8.00844
Nicotiana glauca	31.5111	-9.76512
Nicotiana glauca	30.059	-9.65703
Nicotiana glauca	30.0681	-9.66311
Nicotiana glauca	31.4579	-8.19611
Nicotiana glauca	29.6346	-10.0075
Nicotiana glauca	29.6342	-10.0068
Nicotiana glauca	31.4579	-8.1959
Nicotiana glauca	30.2489	-9.6023
Nicotiana glauca	29.6346	-10.0074
Nicotiana glauca	31.6138	-8.02132
Nicotiana glauca	29.0908	-10.3357
Nicotiana glauca	30.2711	-9.09462
Nicotiana glauca	31.621	-7.97905
Nicotiana glauca	29.4229	-10.1353
Nicotiana glauca	30.4294	-9.62432
Nicotiana glauca	31.4962	-9.76422
Nicotiana glauca	31.4807	-9.76419
Nicotiana glauca	31.5485	-7.60104
Nicotiana glauca	30.4517	-8.87944
Nicotiana glauca	31.3763	-7.78176
Nicotiana glauca	29.6112	-9.94262
Nicotiana glauca	28.9115	-10.1656
Nicotiana glauca	29.5563	-9.5061
Nicotiana glauca	31.4643	-8.17256
Nicotiana glauca	31.2148	-8.23836
Nicotiana glauca	33.5251	-7.80548
Nicotiana glauca	31.4955	-9.76013
Nicotiana glauca	30.6957	-8.15334
Nicotiana glauca	31.4397	-9.75096
Nicotiana glauca	34.0692	-4.97677
Nicotiana glauca	28.8385	-10.4244
Nicotiana glauca	30.073	-9.64005
Nicotiana glauca	30.0592	-9.65724
Nicotiana glauca	29.0813	-10.3314
Nicotiana glauca	29.0813	-10.3314
Nicotiana glauca	33.5143	-7.7912
Nicotiana glauca	30.9898	-9.04034
Nicotiana glauca	30.9298	-9.1827
Nicotiana glauca	30.5858	-9.75136
Nicotiana glauca	31.3496	-9.79523
Nicotiana glauca	34.8566	-2.70461
Nicotiana glauca	33.9562	-6.85606
Nicotiana glauca	30.3448	-9.59668
Nicotiana glauca	33.5334	-7.82938
Nicotiana glauca	35.0198	-2.98885
Nicotiana glauca	35.0197	-2.98885
Nicotiana glauca	32.7082	-9.00292
Nicotiana glauca	30.5123	-9.67953
Nicotiana glauca	31.1499	-7.89505
Nicotiana glauca	35.7853	-5.81638
Nicotiana glauca	29.1337	-10.3985
Nicotiana glauca	30.0524	-9.64067
Nicotiana glauca	31.511	-9.66867
Nicotiana glauca	31.5099	-9.77224
Nicotiana glauca	31.4378	-9.72793
Nicotiana glauca	31.5187	-9.69289
Nicotiana glauca	34.0229	-6.82741
Nicotiana glauca	33.0317	-8.53478
Nicotiana glauca	34.0229	-6.82741
Nicotiana glauca	33.8598	-7.06755
Nicotiana glauca	31.482	-9.7654
Nicotiana glauca	30.0457	-9.64669
Nicotiana glauca	32.741	-9.02978
Nicotiana glauca	30.2798	-9.54239
Nicotiana glauca	29.681	-9.83842
Nicotiana glauca	29.6084	-9.95773
Nicotiana glauca	29.4092	-10.0855
Nicotiana glauca	29.6566	-9.89891
Nicotiana glauca	30.2212	-9.56745
Nicotiana glauca	31.6145	-7.95501
Nicotiana glauca	30.3622	-9.58969
Nicotiana glauca	30.6282	-9.8877
Nicotiana glauca	30.0269	-9.63475
Nicotiana glauca	29.4044	-10.1206
Nicotiana glauca	33.5808	-7.70266
Nicotiana glauca	29.6778	-10.0244
Nicotiana glauca	31.509	-9.60228
Nicotiana glauca	31.5866	-9.64105
Nicotiana glauca	33.5808	-7.70265
Nicotiana glauca	30.6536	-9.81999
Nicotiana glauca	30.5249	-8.92072
Nicotiana glauca	30.219	-9.03859
Nicotiana glauca	30.4843	-8.83691
Nicotiana glauca	35.1584	-2.99132
Nicotiana glauca	29.487	-10.1196
Nicotiana glauca	33.3768	-7.56806
Nicotiana glauca	33.3757	-7.56829
Nicotiana glauca	33.376	-7.56803
Nicotiana glauca	33.3768	-7.56824
Nicotiana glauca	34.0312	-6.83759
Nicotiana glauca	34.0331	-6.83509
Nicotiana glauca	33.376	-7.5684
Nicotiana glauca	33.3759	-7.56807
Nicotiana glauca	33.3758	-7.56834
Nicotiana glauca	29.7109	-9.96941
Nicotiana glauca	31.7237	-7.84163
Nicotiana glauca	29.4215	-10.0702
Nicotiana glauca	33.6046	-7.61948
Nicotiana glauca	34.0271	-6.8283
Nicotiana glauca	31.628	-8.0195
Nicotiana glauca	29.4622	-10.0054
Nicotiana glauca	29.4485	-10.1053
Nicotiana glauca	31.1727	-8.08642
Nicotiana glauca	29.5905	-10.0369
Nicotiana glauca	29.9862	-9.42713
Nicotiana glauca	29.9862	-9.42707
Nicotiana glauca	33.6	-7.61362
Nicotiana glauca	30.6061	-9.78041
Nicotiana glauca	30.5164	-9.67753
Nicotiana glauca	31.6221	-7.98371
Nicotiana glauca	31.4624	-8.16783
Nicotiana glauca	34.2039	-5.51952
Nicotiana glauca	31.4625	-8.16541
Nicotiana glauca	29.7456	-9.25072
Nicotiana glauca	31.4205	-8.07478
Nicotiana glauca	29.7521	-9.24178
Nicotiana glauca	31.4641	-8.17257
Nicotiana glauca	35.2111	-3.90135
Nicotiana glauca	30.0738	-9.6677
Nicotiana glauca	34.8659	-2.49113
Nicotiana glauca	30.0813	-9.66485
Nicotiana glauca	35.2109	-3.90125
Nicotiana glauca	35.8734	-5.3429
Nicotiana glauca	34.9246	-2.7163
Nicotiana glauca	30.1216	-9.6406
Nicotiana glauca	30.493	-8.86547
Nicotiana glauca	30.493	-8.86537
Nicotiana glauca	28.3068	-10.9812
Nicotiana glauca	30.4928	-8.86543
Nicotiana glauca	34.0557	-4.97475
Nicotiana glauca	29.3787	-10.1286
Nicotiana glauca	31.5339	-9.69793
Nicotiana glauca	29.5943	-9.15262
Nicotiana glauca	34.0555	-4.98374
Nicotiana glauca	34.8592	-2.32059
Nicotiana glauca	34.8922	-2.29168
Nicotiana glauca	34.891	-2.29069
Nicotiana glauca	31.5584	-7.90412
Nicotiana glauca	34.8583	-2.70498
Nicotiana glauca	33.5814	-7.69984
Nicotiana glauca	30.1321	-9.62142
Nicotiana glauca	30.9972	-9.68385
Nicotiana glauca	34.6433	-6.40647
Nicotiana glauca	30.076	-9.64051
Nicotiana glauca	30.132	-9.62142
Nicotiana glauca	30.5988	-9.34548
Nicotiana glauca	34.2359	-6.67936
Nicotiana glauca	34.0279	-6.83962
Nicotiana glauca	35.7885	-5.81055
Nicotiana glauca	33.5846	-7.68937
Nicotiana glauca	34.8691	-6.29223
Nicotiana glauca	33.6014	-7.61752
Nicotiana glauca	30.6239	-9.81437
Nicotiana glauca	30.6283	-9.8262
Nicotiana glauca	33.9787	-5.81927
Nicotiana glauca	33.9787	-5.81928
Nicotiana glauca	30.4969	-8.86872
Nicotiana glauca	32.3103	-9.2338
Nicotiana glauca	34.878	-6.28861
Nicotiana glauca	31.3087	-8.13552
Nicotiana glauca	33.0955	-8.22541
Nicotiana glauca	31.5647	-8.47788
Nicotiana glauca	31.3318	-8.13933
Nicotiana glauca	31.3317	-8.14027
Nicotiana glauca	35.0999	-2.28766
Nicotiana glauca	31.7345	-7.98334
Nicotiana glauca	35.067	-2.58653
Nicotiana glauca	34.0142	-5.91505
Nicotiana glauca	31.321	-8.09546
Nicotiana glauca	31.6504	-8.07784
Nicotiana glauca	31.3414	-8.14661
Nicotiana glauca	31.3231	-8.14017
Nicotiana glauca	30.4389	-8.89946
Nicotiana glauca	33.8039	-7.15865
Nicotiana glauca	29.9868	-9.66496
Nicotiana glauca	33.924	-6.80874
Nicotiana glauca	31.1762	-8.08368
Nicotiana glauca	33.5445	-7.75937
Nicotiana glauca	33.5535	-7.6724
Nicotiana glauca	30.4041	-9.53912
Nicotiana glauca	34.1849	-6.64977
Nicotiana glauca	33.5448	-7.75935
Nicotiana glauca	33.5445	-7.7595
Nicotiana glauca	34.6557	-1.95698
Nicotiana glauca	31.6503	-8.07794
Nicotiana glauca	29.7181	-8.9784
Nicotiana glauca	34.2491	-6.58598
Nicotiana glauca	30.4356	-9.56972
Nicotiana glauca	31.5388	-9.5293
Nicotiana glauca	35.2363	-3.92941
Nicotiana glauca	35.2363	-3.92941
Nicotiana glauca	35.2363	-3.92941
Nicotiana glauca	33.8448	-7.04226
Nicotiana glauca	35.2363	-3.92941
Nicotiana glauca	34.008	-6.81968
Nicotiana glauca	34.0079	-6.81954
Nicotiana glauca	34.0079	-6.81952
Nicotiana glauca	35.2363	-3.92941
Nicotiana glauca	31.4537	-9.73605
Nicotiana glauca	32.6351	-9.14974
Nicotiana glauca	33.529	-7.82101
Nicotiana glauca	30.0839	-9.35875
Nicotiana glauca	33.5114	-7.78592
Nicotiana glauca	31.3466	-8.1439
Nicotiana glauca	32.6351	-9.14974
Nicotiana glauca	31.2636	-9.80061
Nicotiana glauca	28.8201	-10.3793
Nicotiana glauca	29.175	-10.093
Nicotiana glauca	30.284	-9.549
Nicotiana glauca	33.3736	-7.56825
Nicotiana glauca	35.7596	-5.93829
Nicotiana glauca	31.1761	-8.08214
Nicotiana glauca	33.8531	-6.85423
Nicotiana glauca	31.6158	-7.93556
Nicotiana glauca	31.5417	-9.54197
Nicotiana glauca	30.5431	-9.70778
Nicotiana glauca	35.1793	-6.11938
Nicotiana glauca	30.3597	-9.56639
Nicotiana glauca	31.3884	-9.84008
Nicotiana glauca	35.7599	-5.93928
Nicotiana glauca	30.4288	-9.63103
Nicotiana glauca	32.7268	-9.04739
Nicotiana glauca	30.2872	-9.55898
Nicotiana glauca	34.9652	-2.1047
Nicotiana glauca	30.5847	-9.70528
Nicotiana glauca	31.3453	-8.13077
Nicotiana glauca	30.5847	-9.70528
Nicotiana glauca	33.8977	-6.83761
Nicotiana glauca	31.5317	-8.06326
Nicotiana glauca	33.9038	-6.83753
Nicotiana glauca	31.4547	-9.7459
Nicotiana glauca	30.1612	-9.28292
Nicotiana glauca	30.5847	-9.70528
Nicotiana glauca	33.9046	-6.83817
Nicotiana glauca	33.8912	-7.00371
Nicotiana glauca	34.0063	-6.81633
Nicotiana glauca	34.0059	-6.81696
Nicotiana glauca	34.0055	-6.82091
Nicotiana glauca	34.0058	-6.82072
Nicotiana glauca	35.224	-4.7383
Nicotiana glauca	31.3411	-8.10877
Nicotiana glauca	31.3418	-8.14156
Nicotiana glauca	31.3411	-8.10877
Nicotiana glauca	31.4825	-9.76592
Nicotiana glauca	33.4358	-7.63083
Nicotiana glauca	33.4392	-7.62333
Nicotiana glauca	33.5514	-7.45633
Nicotiana glauca	34.0056	-6.82067
Nicotiana glauca	34.0056	-6.82067
Nicotiana glauca	30.486	-9.39613
Nicotiana glauca	33.5514	-7.45633
Nicotiana glauca	31.568	-8.03357
Nicotiana glauca	31.3906	-9.55879
Nicotiana glauca	31.1779	-8.0794
Nicotiana glauca	32.0119	-6.71782
Nicotiana glauca	33.2929	-8.34259
Nicotiana glauca	31.1764	-8.07795
Nicotiana glauca	33.2946	-8.34183
Nicotiana glauca	34.0217	-6.85281
Nicotiana glauca	32.4497	-9.17556
Nicotiana glauca	33.5459	-7.21392
Nicotiana glauca	31.4425	-9.67516
Nicotiana glauca	33.5729	-7.53819
Nicotiana glauca	33.7889	-6.82357
Nicotiana glauca	33.5417	-7.77142
Nicotiana glauca	33.8892	-7.01389
Nicotiana glauca	29.8797	-9.69379
Nicotiana glauca	29.7169	-9.70707
Nicotiana glauca	35.5064	-5.155
Nicotiana glauca	35.6378	-5.27892
Nicotiana glauca	31.4821	-9.7658
Nicotiana glauca	35.2806	-4.84722
Nicotiana glauca	35.5061	-5.15444
Nicotiana glauca	31.6348	-8.00583
Nicotiana glauca	33.1013	-7.61827
Nicotiana glauca	30.4856	-8.84919
Nicotiana glauca	29.7422	-8.974
Nicotiana glauca	33.4616	-7.6024
Nicotiana glauca	29.7422	-8.974
Nicotiana glauca	30.7128	-9.85023
Nicotiana glauca	35.2036	-4.67917
Nicotiana glauca	34.8728	-6.27994
Nicotiana glauca	34.9372	-2.23111
Nicotiana glauca	34.0061	-6.82205
Nicotiana glauca	34.0063	-6.82238
Nicotiana glauca	34.0059	-6.82182
Nicotiana glauca	34.0058	-6.82174
Nicotiana glauca	34.0062	-6.82231
Nicotiana glauca	34.0062	-6.82223
Nicotiana glauca	34.0056	-6.82044
Nicotiana glauca	34.0059	-6.82193
Nicotiana glauca	32.6022	-8.92651
Nicotiana glauca	30.6282	-9.8877
Nicotiana glauca	33.5442	-7.7613
Nicotiana glauca	33.5444	-7.76124
Nicotiana glauca	33.5442	-7.7613
Nicotiana glauca	30.4396	-9.59229
Nicotiana glauca	30.4396	-9.59229
Nicotiana glauca	30.4396	-9.59229
Nicotiana glauca	29.7321	-8.96908
Nicotiana glauca	32.2089	-7.92944
Nicotiana glauca	34.0204	-6.7577
Nicotiana glauca	30.4843	-9.50604
Nicotiana glauca	34.0204	-6.7577
Nicotiana glauca	34.0204	-6.7577
Nicotiana glauca	32.0967	-6.44663
Nicotiana glauca	31.661	-8.06427
Nicotiana glauca	31.661	-8.06419
Nicotiana glauca	34.2479	-6.62164
Nicotiana glauca	34.1413	-6.72655
Nicotiana glauca	33.5243	-7.82448
Nicotiana glauca	34.0083	-6.82035
Nicotiana glauca	33.9144	-6.96101
Nicotiana glauca	33.9766	-6.82696
Nicotiana glauca	30.3999	-9.51797
Nicotiana glauca	30.3999	-9.51797
Nicotiana glauca	34.0138	-6.78535
Nicotiana glauca	34.6894	-1.90569
Nicotiana glauca	31.6818	-7.92881
Nicotiana glauca	33.4389	-7.62333
Nicotiana glauca	33.9175	-6.90664
Nicotiana glauca	30.437	-9.6232
Nicotiana glauca	33.4392	-7.62333
Nicotiana glauca	32.8485	-6.57484
Nicotiana glauca	30.4192	-9.60294
Nicotiana glauca	35.0636	-2.89209
Nicotiana glauca	34.0034	-6.81318
Nicotiana glauca	30.7043	-9.20437
Nicotiana glauca	31.481	-9.76706
Nicotiana glauca	31.5368	-9.68658
Nicotiana glauca	31.4417	-9.60833
Nicotiana glauca	31.3	-8.14586
Nicotiana glauca	30.4672	-8.87401
Nicotiana glauca	30.4603	-8.87819
Nicotiana glauca	30.0801	-9.65125
Nicotiana glauca	33.5795	-7.68053
Nicotiana glauca	31.431	-9.755
Nicotiana glauca	31.0839	-9.80604
Nicotiana glauca	31.5175	-9.6096
Nicotiana glauca	31.5171	-9.61045
Nicotiana glauca	31.0822	-9.80676
Nicotiana glauca	33.6097	-7.65363
Nicotiana glauca	33.5995	-7.66292
Nicotiana glauca	33.6	-7.66271
Nicotiana glauca	34.1581	-6.57585
Nicotiana glauca	31.3415	-8.13617
Nicotiana glauca	29.9741	-9.64504
Nicotiana glauca	33.6049	-7.64447
Nicotiana glauca	35.7883	-5.8106
Nicotiana glauca	31.1724	-8.07963
Nicotiana glauca	30.3555	-9.47538
Nicotiana glauca	32.384	-9.27445
Nicotiana glauca	34.7176	-1.91634
Nicotiana glauca	30.3992	-9.50778
Nicotiana glauca	34.7176	-1.91634
Nicotiana glauca	30.3992	-9.50778
Nicotiana glauca	34.7176	-1.91634
Nicotiana glauca	34.7176	-1.91634
Nicotiana glauca	34.7176	-1.91634
Nicotiana glauca	31.0897	-9.81781
Nicotiana glauca	31.0897	-9.81781
Nicotiana glauca	31.3	-9.78687
Nicotiana glauca	30.467	-8.88617
Nicotiana glauca	31.4544	-7.98875
Nicotiana glauca	31.5126	-9.64621
Nicotiana glauca	32.6081	-8.93519
Nicotiana glauca	28.8308	-10.4125
Nicotiana glauca	31.6508	-8.01639
Nicotiana glauca	31.6508	-8.01639
Nicotiana glauca	31.4091	-8.38474
Nicotiana glauca	31.6508	-8.01639
Nicotiana glauca	31.6508	-8.01639
Nicotiana glauca	31.4091	-8.38477
Nicotiana glauca	34.0124	-6.81771
Nicotiana glauca	35.0257	-2.32329
Nicotiana glauca	33.393	-8.13793
Nicotiana glauca	34.1422	-6.73761
Nicotiana glauca	31.0829	-9.81526
Nicotiana glauca	31.5243	-9.62584
Nicotiana glauca	33.4807	-7.93655
Nicotiana glauca	33.4807	-7.93655
Nicotiana glauca	33.9798	-6.89642
Nicotiana glauca	31.6295	-7.98109
Nicotiana glauca	31.517	-8.0592
Nicotiana glauca	29.9698	-9.6649
Nicotiana glauca	30.0337	-9.64289
Nicotiana glauca	29.8858	-9.587
Nicotiana glauca	30.0414	-9.6433
Nicotiana glauca	30.0064	-9.65426
Nicotiana glauca	30.6357	-9.76955
Nicotiana glauca	30.0065	-9.65418
Nicotiana glauca	30.7012	-9.87086
Nicotiana glauca	31.9813	-9.32556
Nicotiana glauca	31.2651	-9.79631
Nicotiana glauca	33.39	-7.55417
Nicotiana glauca	31.3481	-8.12955
Nicotiana glauca	30.7059	-9.85214
Nicotiana glauca	29.9728	-9.66454
Nicotiana glauca	30.5244	-9.67311
Nicotiana glauca	35.1588	-6.1039
Nicotiana glauca	32.9822	-7.62692
Nicotiana glauca	31.5112	-9.77371
Nicotiana glauca	33.5391	-7.67189
Nicotiana glauca	32.9822	-7.62692
Nicotiana glauca	31.6231	-7.99552
Nicotiana glauca	28.9429	-9.96263
Nicotiana glauca	30.4181	-9.60077
Nicotiana glauca	33.8027	-5.93851
Nicotiana glauca	30.074	-9.66558
Nicotiana glauca	30.074	-9.66558
Nicotiana glauca	31.6167	-7.91667
Nicotiana glauca	29.7276	-9.68905
Nicotiana glauca	28.9811	-10.2207
Nicotiana glauca	29.3678	-10.1562
Nicotiana glauca	28.9839	-10.059
Nicotiana glauca	29.6814	-9.5056
Nicotiana glauca	31.4645	-9.75777
Nicotiana glauca	31.4645	-9.75777
Nicotiana glauca	31.5908	-9.68099
Nicotiana glauca	34.876	-6.29819
Nicotiana glauca	34.23	-6.67
Nicotiana glauca	34.2333	-6.66667
Nicotiana glauca	29.8839	-9.5825
Nicotiana glauca	35.195	-6.12765
Nicotiana glauca	35.7667	-5.93333
Nicotiana glauca	35.7604	-5.93937
Nicotiana glauca	34.1333	-6.73333
Nicotiana glauca	34.13	-6.73
Nicotiana glauca	34.25	-6.56667
Nicotiana glauca	32.0333	-9.06667
Nicotiana glauca	32.0333	-9.06667
Nicotiana glauca	33.5786	-7.5969
Nicotiana glauca	34.806	-2.41
Nicotiana glauca	34.806	-2.41
Nicotiana glauca	34.806	-2.41
Nicotiana glauca	34.806	-2.41
Nicotiana glauca	34.806	-2.41
Nicotiana glauca	31.5131	-9.76972
Nicotiana glauca	31.5131	-9.76972
Nicotiana glauca	35.7667	-5.93333
Nicotiana glauca	34.2333	-6.66667
Nicotiana glauca	35.2	-6.13333
Nicotiana glauca	31.6199	-7.9792
Nothoscordum borbonicum	35.7855	-5.876
Oxalis pes-caprae	34.0325	-6.83644
Oxalis pes-caprae	34.0758	-5.55417
Oxalis pes-caprae	33.5363	-7.62863
Oxalis pes-caprae	34.0735	-5.553
Oxalis pes-caprae	34.0712	-5.55311
Oxalis pes-caprae	35.1979	-6.11287
Oxalis pes-caprae	35.7908	-5.9249
Oxalis pes-caprae	34.0301	-5.6259
Oxalis pes-caprae	34.0715	-5.55273
Oxalis pes-caprae	35.2384	-5.18045
Oxalis pes-caprae	34.0735	-5.55308
Oxalis pes-caprae	34.0736	-5.55304
Oxalis pes-caprae	34.252	-6.66741
Oxalis pes-caprae	35.1605	-5.25154
Oxalis pes-caprae	34.2535	-6.60069
Oxalis pes-caprae	33.8535	-6.78944
Oxalis pes-caprae	34.2444	-6.677
Oxalis pes-caprae	35.1814	-6.12774
Oxalis pes-caprae	34.0718	-5.55354
Oxalis pes-caprae	35.1646	-6.10815
Oxalis pes-caprae	35.5081	-5.32895
Oxalis pes-caprae	35.2096	-6.14013
Oxalis pes-caprae	35.5073	-5.32915
Oxalis pes-caprae	34.7728	-5.5442
Oxalis pes-caprae	33.6097	-7.65052
Oxalis pes-caprae	35.1837	-6.12889
Oxalis pes-caprae	34.6444	-6.40753
Oxalis pes-caprae	34.4204	-2.88866
Oxalis pes-caprae	34.0767	-5.55178
Oxalis pes-caprae	34.2535	-6.60061
Oxalis pes-caprae	34.9313	-2.3522
Oxalis pes-caprae	33.6567	-7.01175
Oxalis pes-caprae	33.4802	-7.62879
Oxalis pes-caprae	33.5989	-7.66027
Oxalis pes-caprae	35.355	-6.08115
Oxalis pes-caprae	34.0074	-6.44462
Oxalis pes-caprae	33.5972	-7.65447
Oxalis pes-caprae	35.2532	-3.65675
Oxalis pes-caprae	33.3538	-7.97784
Oxalis pes-caprae	33.5659	-7.54043
Oxalis pes-caprae	33.5662	-7.54003
Oxalis pes-caprae	35.1685	-6.12208
Oxalis pes-caprae	33.6276	-7.16366
Oxalis pes-caprae	31.4386	-9.75141
Oxalis pes-caprae	33.4759	-7.58681
Oxalis pes-caprae	35.7845	-5.89294
Oxalis pes-caprae	33.4741	-7.585
Oxalis pes-caprae	33.9375	-6.93992
Oxalis pes-caprae	33.6081	-7.64983
Oxalis pes-caprae	33.0674	-7.25366
Oxalis pes-caprae	33.3536	-7.9779
Oxalis pes-caprae	33.0004	-8.73539
Oxalis pes-caprae	33.8533	-6.27347
Oxalis pes-caprae	34.0641	-4.97174
Oxalis pes-caprae	32.7353	-9.04367
Oxalis pes-caprae	34.0326	-6.83627
Oxalis pes-caprae	35.7876	-5.83654
Oxalis pes-caprae	35.7278	-5.91197
Oxalis pes-caprae	35.7908	-5.81745
Oxalis pes-caprae	34.0594	-4.98831
Oxalis pes-caprae	33.5918	-7.62405
Oxalis pes-caprae	33.9872	-5.0195
Oxalis pes-caprae	35.1687	-5.26195
Oxalis pes-caprae	31.4834	-7.98334
Oxalis pes-caprae	34.0105	-6.84351
Oxalis pes-caprae	33.8598	-7.06755
Oxalis pes-caprae	33.7357	-7.32979
Oxalis pes-caprae	35.7815	-5.8101
Oxalis pes-caprae	35.1687	-5.26195
Oxalis pes-caprae	33.6096	-7.62654
Oxalis pes-caprae	33.3764	-7.56859
Oxalis pes-caprae	33.3765	-7.56856
Oxalis pes-caprae	34.0581	-4.97402
Oxalis pes-caprae	32.7216	-9.04933
Oxalis pes-caprae	35.1707	-5.25625
Oxalis pes-caprae	34.8693	-2.43492
Oxalis pes-caprae	31.0463	-6.58126
Oxalis pes-caprae	33.3943	-7.56608
Oxalis pes-caprae	34.0278	-4.88076
Oxalis pes-caprae	34.0277	-4.88093
Oxalis pes-caprae	34.0285	-4.88059
Oxalis pes-caprae	35.1706	-5.2563
Oxalis pes-caprae	34.8693	-2.43492
Oxalis pes-caprae	34.9256	-2.71502
Oxalis pes-caprae	33.9431	-6.93775
Oxalis pes-caprae	35.1661	-5.27234
Oxalis pes-caprae	34.9253	-2.71462
Oxalis pes-caprae	35.1661	-5.27234
Oxalis pes-caprae	34.8804	-2.54013
Oxalis pes-caprae	35.8681	-5.35915
Oxalis pes-caprae	33.5591	-7.60844
Oxalis pes-caprae	35.7599	-5.93869
Oxalis pes-caprae	33.3531	-7.97999
Oxalis pes-caprae	34.072	-5.55199
Oxalis pes-caprae	34.0328	-6.83614
Oxalis pes-caprae	34.0727	-5.55293
Oxalis pes-caprae	35.7818	-5.80661
Oxalis pes-caprae	33.3044	-8.32797
Oxalis pes-caprae	34.0022	-6.84081
Oxalis pes-caprae	34.239	-6.67517
Oxalis pes-caprae	33.2215	-7.59947
Oxalis pes-caprae	35.2357	-3.98056
Oxalis pes-caprae	35.4706	-6.03165
Oxalis pes-caprae	35.4701	-6.03235
Oxalis pes-caprae	33.565	-7.65556
Oxalis pes-caprae	34.0752	-5.55387
Oxalis pes-caprae	35.117	-3.64216
Oxalis pes-caprae	34.0317	-6.83945
Oxalis pes-caprae	34.0483	-4.99629
Oxalis pes-caprae	34.0746	-5.55302
Oxalis pes-caprae	33.4534	-7.57424
Oxalis pes-caprae	34.0674	-5.54024
Oxalis pes-caprae	35.8446	-5.55316
Oxalis pes-caprae	35.8446	-5.55317
Oxalis pes-caprae	31.4241	-9.57093
Oxalis pes-caprae	33.8483	-6.7859
Oxalis pes-caprae	32.9043	-6.91388
Oxalis pes-caprae	34.0431	-6.79904
Oxalis pes-caprae	33.9309	-6.82762
Oxalis pes-caprae	33.4711	-7.62918
Oxalis pes-caprae	30.4759	-8.87355
Oxalis pes-caprae	33.0324	-8.69805
Oxalis pes-caprae	33.3599	-8.3069
Oxalis pes-caprae	32.3978	-9.26268
Oxalis pes-caprae	32.6343	-9.15619
Oxalis pes-caprae	33.9912	-6.84574
Oxalis pes-caprae	33.9912	-6.8458
Oxalis pes-caprae	33.6082	-7.55286
Oxalis pes-caprae	34.2509	-5.6689
Oxalis pes-caprae	33.7429	-6.19719
Oxalis pes-caprae	35.7884	-5.88475
Oxalis pes-caprae	33.6183	-7.48881
Oxalis pes-caprae	33.5842	-7.66383
Oxalis pes-caprae	33.2433	-8.40724
Oxalis pes-caprae	33.9299	-6.82906
Oxalis pes-caprae	35.7848	-5.92968
Oxalis pes-caprae	32.8963	-7.66703
Oxalis pes-caprae	33.5961	-7.63568
Oxalis pes-caprae	33.5961	-7.63568
Oxalis pes-caprae	33.5963	-7.63642
Oxalis pes-caprae	33.9755	-6.83696
Oxalis pes-caprae	34.9254	-2.71488
Oxalis pes-caprae	35.7807	-5.80255
Oxalis pes-caprae	31.6052	-7.82427
Oxalis pes-caprae	34.682	-1.90016
Oxalis pes-caprae	35.2477	-3.9509
Oxalis pes-caprae	33.9396	-6.93758
Oxalis pes-caprae	33.4386	-8.056
Oxalis pes-caprae	35.2232	-4.74071
Oxalis pes-caprae	33.252	-8.52659
Oxalis pes-caprae	33.8172	-7.14944
Oxalis pes-caprae	31.6548	-8.04028
Oxalis pes-caprae	33.5658	-7.57917
Oxalis pes-caprae	35.7924	-5.86084
Oxalis pes-caprae	34.2185	-4.00585
Oxalis pes-caprae	35.7852	-5.71401
Oxalis pes-caprae	35.0932	-2.80922
Oxalis pes-caprae	33.9916	-4.98842
Oxalis pes-caprae	33.3396	-7.55173
Oxalis pes-caprae	33.9852	-6.84426
Oxalis pes-caprae	34.2326	-4.00438
Oxalis pes-caprae	33.9859	-6.84321
Oxalis pes-caprae	33.8796	-5.54077
Oxalis pes-caprae	33.8691	-5.54376
Oxalis pes-caprae	34.2545	-6.6772
Oxalis pes-caprae	31.5874	-8.74285
Oxalis pes-caprae	33.3838	-8.19415
Oxalis pes-caprae	33.5901	-7.64198
Oxalis pes-caprae	33.5188	-7.2038
Oxalis pes-caprae	34.0056	-6.82141
Oxalis pes-caprae	32.3566	-9.20633
Oxalis pes-caprae	33.8793	-5.75681
Oxalis pes-caprae	35.0851	-2.23142
Oxalis pes-caprae	33.0556	-7.53118
Oxalis pes-caprae	33.9649	-6.90107
Oxalis pes-caprae	35.1542	-6.09312
Oxalis pes-caprae	33.526	-7.78814
Oxalis pes-caprae	35.843	-5.56123
Oxalis pes-caprae	34.0386	-5.03238
Oxalis pes-caprae	33.526	-7.78814
Oxalis pes-caprae	35.1129	-2.89081
Oxalis pes-caprae	33.5285	-7.80418
Oxalis pes-caprae	34.682	-1.90016
Oxalis pes-caprae	34.682	-1.90016
Oxalis pes-caprae	34.0223	-5.00585
Oxalis pes-caprae	35.8201	-5.72397
Oxalis pes-caprae	35.779	-5.82168
Oxalis pes-caprae	33.9966	-6.84025
Oxalis pes-caprae	33.6118	-7.11146
Oxalis pes-caprae	34.2509	-6.57981
Oxalis pes-caprae	33.6119	-7.11127
Oxalis pes-caprae	34.2509	-6.57981
Oxalis pes-caprae	35.0871	-2.2403
Oxalis pes-caprae	33.931	-6.83329
Oxalis pes-caprae	31.7981	-7.72043
Oxalis pes-caprae	34.2558	-6.65571
[truncated: 1,964 more rows]

## Sheet: 5_Regional_Statistics
Region	Total_Occurrences	Density_Score
Tanger-Tétouan-Al Hoceïma	638	0.0410158
Rabat-Salé-Kénitra	604	0.0284931
Casablanca-Settat	383	0.0216607
Marrakech-Safi	495	0.0124964
Oriental	597	0.00990967
Souss-Massa	539	0.00941256
Fès-Meknès	258	0.00571029
Béni Mellal-Khénifra	118	0.00371443
Drâa-Tafilalet	189	0.00231901
Guelmim-Oued Noun	35	0.000906753
Laâyoune-Sakia El Hamra	3	2.04375e-05
Dakhla-Oued Ed-Dahab	0	0
