# Supplementary material
Source: Research Square preprint supplement (doi:10.21203/rs.3.rs-9794069/v1)
Supplement: Supplementary file 2 [file b28ed1fd50e564ff2a9dbe84.xlsx]

## Sheet: Metadata 
	Title: Table S1. Master Inventory of Invasive Alien Species in Morocco.
	Description: This dataset represents the consolidated national inventory of 604 species identified as alien invasive within Morocco. The table includes taxonomic classification, invasion status at both national and global levels, habitat systems, and expert validation notes.
	Column Name	Description	Data Source & Date
	GBIF_ID	Unique identifier (Usage Key) for the species in the Global Biodiversity Information Facility backbone.	GBIF Backbone Taxonomy
	Scientific_Name	The accepted scientific name of the species according to The Plant List (TPL) or relevant zoological authorities. Nomenclature is standardized to the GBIF Backbone.	GBIF / The WFO Plant List
	Authority	The full scientific name including the author citation.	GBIF Backbone Taxonomy
	Kingdom	The biological kingdom to which the species belongs (i.e., Plantae, Animalia, Bacteria, Chromista, Fungi).	GBIF Backbone Taxonomy
	Phylum	The taxonomic phylum.	GBIF Backbone Taxonomy
	Class	The taxonomic class.	GBIF Backbone Taxonomy
	Family	The taxonomic family to which the species belongs.	GBIF / The WFO Plant List
	Environment_System	The habitat system where the species occurs (i.e., Terrestrial, Freshwater, Marine, Brackish, host).	SInAs National Database
	Trophic_Guild	The primary feeding strategy (Herbivore, Predator, Omnivore, Detritivore). Vertebrates were aligned with EltonTraits 1.0 and FishBase. Invertebrates were assigned using a hierarchical inference method (e.g., AnimalTraits, Tachet et al.); taxa with ambiguous strategies were classified as "Unknown".	EltonTraits 1.0; FishBase; AnimalTraits; Tachet et al. (2010)
	Life_Form	Plant growth forms categorized into classes (i. e., Herb, Shrub, Tree, Vine) based on the dominant life form in the Mediterranean region. Assignment followed the protocol of Engemann et al. (2016).	Engemann et al. (2016); Plants of the World Online (POWO); World Flora Online (WFO)
	Occurrence_Status	Statement of the presence or absence of the species at the location (i. e., Present, Absent). Follows Darwin Core standards.	SInAs / National Expert Workshop
	Establishment_Means	The process by which the species was established (i. e., Alien, Crypto-expanding, Cryptogenic, Vagrant, Introduced, Incertain). Follows Darwin Core standards.	SInAs / National Expert Workshop
	Degree_of_Establishment	The extent to which the species has established a population (e.g., Casual, Established, Established-reproducing, Invasive).	SInAs / National Expert Workshop
	Source_Database_SInAs	The original dataset identifier within the National Information System on Biodiversity (SInAs).	SInAs National Database
	CABI_Info	Information or links present in the CABI Digital Library regarding the species.	CABI
	Literature_Ref	Bibliographic references supporting the species' inclusion or status.	SInAs / Literature Review
	GRIIS_Global_Status	Indicates whether the species is documented as invasive in at least one country globally according to GRIIS. "Yes" = invasive somewhere in the world; "No" = not documented as invasive.	GRIIS via GBIF
	GRIIS_Morocco	Indicates whether the species is specifically documented as invasive in Morocco according to GRIIS. "Yes" = recorded as invasive in Morocco; "No" = not recorded.	GRIIS Morocco dataset via GBIF
	GISD_Listed	Indicates whether the species is included in the Global Invasive Species Database (GISD), which focuses on species that negatively impact biodiversity. "Yes" = listed; "No" = not listed.	GISD / IUCN
	GRIIS_Country_Count	The total number of countries where this species is documented as invasive according to GRIIS. Higher numbers indicate wider global invasion extent.	GRIIS via GBIF
	Data_Sources_Compiled	A summary list of all databases where the species record was found (e.g., "GBIF; GRIIS; GISD").	Consolidated from all sources
	Expert_Comments	Specific remarks or validation notes provided by national experts during the SInAs validation process.	National Expert Workshop
	High_Impact_Flag	A combined assessment flag indicating species of particular concern. "Yes" if the species is invasive in 50+ countries OR has major/massive ecological impacts in GISD.	Combined from GRIIS & GISD

## Sheet: Table_S1_Master_Inventory
GBIF_ID	Scientific_Name	Authority	Kingdom	Phylum	Class	Family	Environment_System	Trophic_Guild	Life_Form	Occurrence_Status	Establishment_Means	Degree_of_Establishment	Source_Database_SInAs	CABI_Info	Literature_Ref	GRIIS_Global_Status	GRIIS_Morocco	GISD_Listed	GRIIS_Country_Count	Data_Sources_Compiled	Expert_Comments	High_Impact_Flag
3152633	Abutilon grandifolium	Abutilon grandifolium (Willd.) Sweet	Plantae	Tracheophyta	Magnoliopsida	Malvaceae	Terrestrial		Herb	present	introduced		GRIIS	not present		Yes	Yes	No	16	El Jamaai list; GBIF Morocco; WCVP; GRIIS	Keep: Non-native (Source: WCVP)	No
3152614	Abutilon theophrasti	Abutilon theophrasti Medik.	Plantae	Tracheophyta	Magnoliopsida	Malvaceae	Terrestrial		Herb	present	introduced		FirstRecords; GloNAF; GRIIS	invasive	Menioui (2021); Sahara and Sahel Observatory (2020)	Yes	Yes	No	37	El Jamaai list; GBIF Morocco; WCVP; GRIIS	Keep: Non-native (Source: WCVP)	No
2981303	Acacia baileyana	Acacia baileyana F.Muell.	Plantae	Tracheophyta	Magnoliopsida	Fabaceae	Terrestrial		Tree							Yes	No	No	7	iNaturalist; GBIF Morocco; WCVP; GRIIS	Keep: Non-native (Source: WCVP)	No
2980425	Acacia cyclops	Acacia cyclops A.Cunn. ex G.Don	Plantae	Tracheophyta	Magnoliopsida	Fabaceae	Terrestrial		Tree	present	introduced		GloNAF; GRIIS	planted		Yes	Yes	Yes	21	El Jamaai list; iNaturalist; GBIF Morocco; WCVP; GRIIS; GISD; GRIIS, GISD	Keep: Non-native (Source: WCVP)	Yes
2979474	Acacia dealbata	Acacia dealbata Link	Plantae	Tracheophyta	Magnoliopsida	Fabaceae	Terrestrial		Tree							Yes	No	Yes	26	iNaturalist; BIEN; GBIF Morocco; BIEN-native; GRIIS; GISD; GRIIS, GISD		Yes
2979257	Acacia farnesiana	Acacia farnesiana (L.) Willd.	Plantae	Tracheophyta	Magnoliopsida	Fabaceae	Terrestrial		Tree	present	introduced		GloNAF; GRIIS	planted	Menioui (2021)	Yes	Yes	Yes	57	El Jamaai list; BIEN; GBIF Morocco; BIEN-native; GRIIS; GISD; GRIIS, GISD	Keep: Non-native (Source: POW), note that in POW it is 'Vachellia farnesiana'	Yes
7739500	Acacia horrida	Acacia horrida Span.	Plantae	Tracheophyta	Magnoliopsida	Fabaceae	Terrestrial		Tree							Yes	No	No	1	El Jamaai list; BIEN; BIEN-native; GRIIS		No
2979128	Acacia karroo	Acacia karroo Hayne	Plantae	Tracheophyta	Magnoliopsida	Fabaceae	Terrestrial		Tree				no data	introduced		Yes	Yes	No	11	El Jamaai list; BIEN; GBIF Morocco; BIEN-native; GRIIS	Keep: Non-native (Source: POW), note that in POW it is 'Vachellia karroo'	No
2978730	Acacia longifolia	Acacia longifolia (Andrews) Willd.	Plantae	Tracheophyta	Magnoliopsida	Fabaceae	Terrestrial		Tree		introduced		GloNAF	not present		Yes	No	Yes	18	El Jamaai list; GBIF Morocco; WCVP; GRIIS; GISD; GRIIS, GISD	Keep: Non-native (Source: WCVP)	No
2979775	Acacia mearnsii	Acacia mearnsii De Wild.	Plantae	Tracheophyta	Magnoliopsida	Fabaceae	Terrestrial		Tree							Yes	No	Yes	31	El Jamaai list; iNaturalist; GBIF Morocco; WCVP; GRIIS; GISD; GRIIS, GISD		Yes
2979000	Acacia melanoxylon	Acacia melanoxylon R.Br.	Plantae	Tracheophyta	Magnoliopsida	Fabaceae	Terrestrial		Tree	present	introduced		GloNAF; GRIIS	not present		Yes	Yes	Yes	34	El Jamaai list; iNaturalist; BIEN; GBIF Morocco; WCVP; BIEN-native; GRIIS; GISD; GRIIS, GISD	Keep: Non-native (Source: WCVP)	No
2978604	Acacia pycnantha	Acacia pycnantha Benth.	Plantae	Tracheophyta	Magnoliopsida	Fabaceae	Terrestrial		Tree							Yes	No	Yes	4	El Jamaai list; iNaturalist; GBIF Morocco; WCVP; GRIIS; GISD; GRIIS, GISD		Yes
2979408	Acacia retinodes	Acacia retinodes Schltdl.	Plantae	Tracheophyta	Magnoliopsida	Fabaceae	Terrestrial		Tree							Yes	No	Yes	5	iNaturalist; BIEN; GBIF Morocco; WCVP; BIEN-native; GRIIS; GISD; GRIIS, GISD	Keep: Non-native (Source: WCVP)	No
2978548	Acacia salicina	Acacia salicina Lindl.	Plantae	Tracheophyta	Magnoliopsida	Fabaceae	Terrestrial		Tree							Yes	No	No	4	iNaturalist; GBIF Morocco; GRIIS		No
2978552	Acacia saligna	Acacia saligna (Labill.) H.L.Wendl.	Plantae	Tracheophyta	Magnoliopsida	Fabaceae	Terrestrial		Tree	present	introduced		GloNAF; GRIIS	introduced		Yes	Yes	Yes	42	El Jamaai list; iNaturalist; BIEN; GBIF Morocco; WCVP; BIEN-native; GRIIS; GISD; GRIIS, GISD	Keep: Non-native (Source: BIEN and WCVP)	No
3057221	Acalypha wilkesiana	Acalypha wilkesiana MÃ¼ll.Arg.	Plantae	Tracheophyta	Magnoliopsida	Euphorbiaceae	Terrestrial		Herb							Yes	No	No	4	Literature; GBIF Morocco; GRIIS ; Added: Buanani, R., et al. "INVENTORY OF ORNAMENTAL PLANTS AT THE CAMPUS OF IBN TOFAIL UNIVERSITY, KENITRA (MOROCCO)." Plant Archives 20.2 (2020): 1108-1113.	Keep: from literature	No
3100375	Acanthospermum hispidum	Acanthospermum hispidum DC.	Plantae	Tracheophyta	Magnoliopsida	Asteraceae	Terrestrial		Herb		introduced		GloNAF	not present		Yes	No	No	47	El Jamaai list; BIEN; GBIF Morocco; BIEN-native; GRIIS	Keep: Non-native (Source: POW)	No
3189866	Acer negundo	Acer negundo L.	Plantae	Tracheophyta	Magnoliopsida	Sapindaceae	Terrestrial		Herb							Yes	No	No	38	iNaturalist; GBIF Morocco; WCVP; GRIIS	Keep: Non-native (Source: WCVP)	No
10928934	Achatina fulica	Achatina fulica Bowdich, 1822	Animalia	Mollusca	Gastropoda	Achatinidae	Terrestrial	Herbivore					no data	absent			No	Yes			introduced according to https://www.molluscabase.org/aphia.php?p=taxdetails&id=881469#distributions
1739837	Acleris undulana	Acleris undulana (Walsingham, 1900)	Animalia	Arthropoda	Insecta	Tortricidae	Terrestrial	Unknown					no data	no access	Menioui (2021)		No	no data			introduced according to https://www.foret-mediterraneenne.org/upload/biblio/FORET_MED_1999_4_203.pdf
1651891	Aedes aegypti	Aedes aegypti (Linnaeus, 1762)	Animalia	Arthropoda	Insecta	Culicidae		Parasite					no data	not present	Bennouna et al 2026; MSPS 2023		No	Yes			Confirmed by Dr Kawtar Kettani <kettani.ka@gmail.com>
1651430	Aedes albopictus	Aedes albopictus (Skuse, 1894)	Animalia	Arthropoda	Insecta	Culicidae	Terrestrial; Freshwater	Parasite		present	introduced		GRIIS	not present	Menioui (2021)		Yes	non native			Confirmed by Dr Kawtar Kettani <kettani.ka@gmail.com>
2767031	Agave americana	Agave americana L.	Plantae	Tracheophyta	Liliopsida	Asparagaceae	Terrestrial		Herb							Yes	Yes	Yes	59	El Jamaai list; iNaturalist; BIEN; GBIF Morocco; WCVP; BIEN-native; GRIIS; GISD; GRIIS, GISD ; Added: Buanani, R., et al. "INVENTORY OF ORNAMENTAL PLANTS AT THE CAMPUS OF IBN TOFAIL UNIVERSITY, KENITRA (MOROCCO)." Plant Archives 20.2 (2020): 1108-1113.		Yes
2766636	Agave sisalana	Agave sisalana Perrine	Plantae	Tracheophyta	Liliopsida	Asparagaceae	Terrestrial		Herb							Yes	Yes	Yes	50	El Jamaai list; WCVP; GRIIS; GISD; GRIIS, GISD		Yes
5400613	Ageratina adenophora	Ageratina adenophora (Spreng.) R.M.King & H.Rob.	Plantae	Tracheophyta	Magnoliopsida	Asteraceae	Terrestrial		Herb							Yes	Yes	Yes	30	El Jamaai list; iNaturalist; WCVP; GRIIS; GISD; GRIIS, GISD		No
5401673	Ageratum conyzoides	Ageratum conyzoides L.	Plantae	Tracheophyta	Magnoliopsida	Asteraceae	Terrestrial		Herb							Yes	No	Yes	98	El Jamaai list; GRIIS; GISD; GRIIS, GISD		Yes
5401760	Ageratum houstonianum	Ageratum houstonianum Mill.	Plantae	Tracheophyta	Magnoliopsida	Asteraceae	Terrestrial		Herb							Yes	No	No	38	Literature; GRIIS ; Added: LâˆšÂ©ger, J.-F., Chambouleyron, M., Herment, P.-C., Verloove, F., Chatelain, C., Mombrial, F., Andrieu, F., Homrani Bakali, A., & Tanji, A. (2025). Contribution âˆšâ€ la connaissance de la flore du Maroc, notamment de plantes exogâˆšÂ®nes naturalisâˆšÂ©es. Carnets botaniques, 266. https://doi.org/10.34971/A41W-AC40		No
3190653	Ailanthus altissima	Ailanthus altissima (Mill.) Swingle	Plantae	Tracheophyta	Magnoliopsida	Simaroubaceae	Terrestrial		Tree							Yes	Yes	Yes	49	El Jamaai list; iNaturalist; GBIF Morocco; WCVP; GRIIS; GISD; GRIIS, GISD		No
2972983	Albizia julibrissin	Albizia julibrissin Durazz.	Plantae	Tracheophyta	Magnoliopsida	Fabaceae	Terrestrial		Herb							Yes	No	Yes	29	iNaturalist; BIEN; GBIF Morocco; BIEN-native; GRIIS; GISD; GRIIS, GISD		No
2362925	Alburnus alburnus	Alburnus alburnus (Linnaeus, 1758)	Animalia	Chordata		Cyprinidae	Freshwater; Brackish	Omnivore		present	introduced		GRIIS	not present			Yes	no data			https://www.iucnredlist.org/species/789/135064432#geographic-range
5406789	Alcea rosea	Alcea rosea L.	Plantae	Tracheophyta	Magnoliopsida	Malvaceae	Terrestrial		Herb							Yes	No	No	23	El Jamaai list; iNaturalist; GBIF Morocco; WCVP; GRIIS		No
2857697	Allium cepa	Allium cepa L.	Plantae	Tracheophyta	Liliopsida	Amaryllidaceae	Terrestrial		Herb							Yes	No	No	33	BIEN; GBIF Morocco; WCVP; BIEN-native; GRIIS	Keep: Non-native (Source: BIEN and WCVP)	No
2856348	Allium neapolitanum	Allium neapolitanum Cirillo	Plantae	Tracheophyta	Liliopsida	Amaryllidaceae	Terrestrial		Herb							Yes	No	No	7	BIEN; GBIF Morocco; WCVP; BIEN-native; GRIIS	Keep: Non-native (Source: BIEN and WCVP)	No
2856681	Allium sativum	Allium sativum L.	Plantae	Tracheophyta	Liliopsida	Amaryllidaceae	Terrestrial		Herb							Yes	No	No	24	BIEN; GBIF Morocco; WCVP; BIEN-native; GRIIS	Keep: Non-native (Source: BIEN and WCVP)	No
2777537	Aloe arborescens	Aloe arborescens Mill.	Plantae	Tracheophyta	Liliopsida	Asphodelaceae	Terrestrial		Herb							Yes	No	No	9	iNaturalist; BIEN; GBIF Morocco; WCVP; BIEN-native; GRIIS	Keep: Non-native (Source: BIEN and WCVP)	No
2777430	Aloe maculata	Aloe maculata All.	Plantae	Tracheophyta	Liliopsida	Asphodelaceae	Terrestrial		Herb							Yes	No	No	5	iNaturalist; GBIF Morocco; GRIIS		No
2777724	Aloe vera	Aloe vera (L.) Burm.f.	Plantae	Tracheophyta	Liliopsida	Asphodelaceae	Terrestrial		Herb							Yes	Yes	No	35	El Jamaai list; GBIF Morocco; WCVP; GRIIS		No
2406708	Aluterus monoceros	Aluterus monoceros (Linnaeus, 1758)	Animalia	Chordata		Monacanthidae	Marine	Unknown		present	introduced	established	FirstRecords	no data			No	no data			https://www.ciesm.org/atlas/Aluterusmonocerus.php
7905507	Amaranthus albus	Amaranthus albus L.	Plantae	Tracheophyta	Magnoliopsida	Amaranthaceae	Terrestrial		Herb							Yes	Yes	No	39	El Jamaai list; iNaturalist; BIEN; GBIF Morocco; WCVP; BIEN-native; GRIIS		No
5384395	Amaranthus blitoides	Amaranthus blitoides S.Watson	Plantae	Tracheophyta	Magnoliopsida	Amaranthaceae	Terrestrial		Herb							Yes	Yes	No	39	El Jamaai list; iNaturalist; BIEN; GBIF Morocco; WCVP; BIEN-native; GRIIS		No
8911082	Amaranthus blitum	Amaranthus blitum L.	Plantae	Tracheophyta	Magnoliopsida	Amaranthaceae	Terrestrial		Herb							Yes	Yes	No	58	El Jamaai list; BIEN; GBIF Morocco; WCVP; BIEN-native; GRIIS		Yes
5384390	Amaranthus cruentus	Amaranthus cruentus L.	Plantae	Tracheophyta	Magnoliopsida	Amaranthaceae	Terrestrial		Herb							Yes	No	No	39	iNaturalist; BIEN; GBIF Morocco; WCVP; BIEN-native; GRIIS	Keep: Non-native (Source: BIEN and WCVP)	No
5384396	Amaranthus deflexus	Amaranthus deflexus L.	Plantae	Tracheophyta	Magnoliopsida	Amaranthaceae	Terrestrial		Herb							Yes	Yes	No	34	El Jamaai list; iNaturalist; BIEN; GBIF Morocco; WCVP; BIEN-native; GRIIS		No
5384364	Amaranthus hybridus	Amaranthus hybridus L.	Plantae	Tracheophyta	Magnoliopsida	Amaranthaceae	Terrestrial		Herb							Yes	Yes	No	71	El Jamaai list; iNaturalist; BIEN; GBIF Morocco; WCVP; BIEN-native; GRIIS		Yes
9080185	Amaranthus hypochondriacus	Amaranthus hypochondriacus L.	Plantae	Tracheophyta	Magnoliopsida	Amaranthaceae	Terrestrial		Herb							Yes	Yes	No	19	El Jamaai list; BIEN; GBIF Morocco; WCVP; BIEN-native; GRIIS		No
5384332	Amaranthus muricatus	Amaranthus muricatus (Gillies ex Moq.) Hieron.	Plantae	Tracheophyta	Magnoliopsida	Amaranthaceae	Terrestrial		Herb							Yes	Yes	No	16	El Jamaai list; BIEN; GBIF Morocco; WCVP; BIEN-native; GRIIS		No
5384393	Amaranthus palmeri	Amaranthus palmeri S.Watson	Plantae	Tracheophyta	Magnoliopsida	Amaranthaceae	Terrestrial		Herb							Yes	No	No	13	Literature; GBIF Morocco; GRIIS ; Added: Tanji, A. (2023). Two new annual weeds in Morocco: Amaranthus palmeri and Chenopodium ficifolium subsp. ficifolium (Amaranthaceae) Abstract. Flora Mediterranea, 33.	Keep: from literature	No
5384359	Amaranthus powellii	Amaranthus powellii S.Watson	Plantae	Tracheophyta	Magnoliopsida	Amaranthaceae	Terrestrial		Herb							Yes	Yes	No	18	El Jamaai list; BIEN; GBIF Morocco; WCVP; BIEN-native; GRIIS		No
6109534	Amaranthus retroflexus	Amaranthus retroflexus L.	Plantae	Tracheophyta	Magnoliopsida	Amaranthaceae	Terrestrial		Herb							Yes	Yes	No	54	El Jamaai list; iNaturalist; BIEN; GBIF Morocco; WCVP; BIEN-native; GRIIS		Yes
5384401	Amaranthus spinosus	Amaranthus spinosus L.	Plantae	Tracheophyta	Magnoliopsida	Amaranthaceae	Terrestrial		Herb							Yes	No	No	72	Literature; GRIIS ; Added: Sukhorukov, A. P., Lâ€šÃ Ã¶Â¬Â©ger, J. F., & Chambouleyron, M. (2023). Two new species alien to the flora of Morocco: Amaranthus spinosus (Amaranthaceae) and Cardamine occulta (Brassicaceae). Flora Mediterranea, 33, 31-38.	Keep: from literature	Yes
5548401	Amaranthus standleyanus	Amaranthus standleyanus Parodi ex Covas	Plantae	Tracheophyta	Magnoliopsida	Amaranthaceae	Terrestrial		Herb							Yes	Yes	No	7	El Jamaai list; WCVP; GRIIS		No
5384334	Amaranthus viridis	Amaranthus viridis L.	Plantae	Tracheophyta	Magnoliopsida	Amaranthaceae	Terrestrial		Herb							Yes	Yes	No	77	El Jamaai list; iNaturalist; BIEN; GBIF Morocco; WCVP; BIEN-native; GRIIS		Yes
7499720	Ambrosia maritima	Ambrosia maritima L.	Plantae	Tracheophyta	Magnoliopsida	Asteraceae	Terrestrial		Herb							Yes	Yes	No	9	El Jamaai list; WCVP; GRIIS		No
3110686	Ambrosia psilostachya	Ambrosia psilostachya DC.	Plantae	Tracheophyta	Magnoliopsida	Asteraceae	Terrestrial		Herb							Yes	No	No	11	Literature; GRIIS ; Added: Tanji, A. (2023). Two new weeds in Morocco: Ambrosia psilostachya (Asteraceae) and Datura ferox (Solanaceae). Flora Mediterranea, 33.	Keep: from literature	No
3188717	Ammannia latifolia	Ammannia latifolia L.	Plantae	Tracheophyta	Magnoliopsida	Lythraceae	Terrestrial		Herb							Yes	Yes	No	3	El Jamaai list; WCVP; GRIIS		No
4346612	Anguillicola crassus	Anguillicola crassus Kuwahara, Niimi & Itagaki, 1974	Animalia	Nematoda	Chromadorea	Anguillicolidae	Marine	Unknown			Alien	established	no data	invasive	Menioui (2021); Sahara and Sahel Observatory (2020); Mghili et al. (2024)		No	no data			Loukili, A. and Belghyti, D. (2007) The Dynamics of the Nematode Anguillicola crassus, Kuvahara 1974 in Eel Anguilla anguilla (L. 1758) in the Sebou estuary (Morocco). Parasitology Research, 100, 683-686. https://doi.org/10.1007/s00436-006-0349-y
3083508	Anredera cordifolia	Anredera cordifolia (Ten.) Steenis	Plantae	Tracheophyta	Magnoliopsida	Basellaceae	Terrestrial		Herb							Yes	No	Yes	37	El Jamaai list; GBIF Morocco; WCVP; GRIIS; GISD; GRIIS, GISD		No
3172001	Antirrhinum majus	Antirrhinum majus L.	Plantae	Tracheophyta	Magnoliopsida	Plantaginaceae	Terrestrial		Herb							Yes	No	No	26	BIEN; GBIF Morocco; WCVP; BIEN-native; GRIIS	Keep: Non-native (Source: BIEN and WCVP)	No
4427567	Apate monachus	Apate monachus Fabricius, 1775	Animalia	Arthropoda	Insecta	Bostrichidae	Terrestrial	Herbivore					no data	no access	Menioui (2021)		No	no data			confirmed by Dr YOUSRA BENYAHIA <benyahia.y@ucd.ac.ma>
1364710	Aphytis lingnanensis	Aphytis lingnanensis Compere, 1955	Animalia	Arthropoda	Insecta	Aphelinidae		Unknown		present	introduced	established	FirstRecords	no access			No	no data			confirmed by Dr YOUSRA BENYAHIA <benyahia.y@ucd.ac.ma>
3114986	Arctotheca calendula	Arctotheca calendula (L.) Levyns	Plantae	Tracheophyta	Magnoliopsida	Asteraceae	Terrestrial		Herb							Yes	Yes	No	8	El Jamaai list; BIEN; GBIF Morocco; WCVP; BIEN-native; GRIIS		No
2888485	Argemone mexicana	Argemone mexicana L.	Plantae	Tracheophyta	Magnoliopsida	Papaveraceae	Terrestrial		Herb		introduced		GloNAF	not present		Yes	No	No	83	El Jamaai list; WCVP; GRIIS	Keep: Non-native (Source: WCVP)	Yes
5170973	Argiope trifasciata	Argiope trifasciata (ForsskÃ¥l, 1775)	Animalia	Arthropoda	Arachnida	Araneidae		Unknown		present	introduced	established	FirstRecords	no data			No	no data			introduced according to https://www.catalogueoflife.org/data/taxon/GH55 and https://wsc.nmbe.ch/species/3381 consulted 10/03/2025
2362489	Aristichthys nobilis	Aristichthys nobilis (Richardson, 1845)	Animalia	Chordata		Cyprinidae	Freshwater; Brackish	Omnivore		present	introduced		FirstRecords; GRIIS	introduced	Menioui (2021)		Yes	Yes			https://www.catalogueoflife.org/data/taxon/6N2TM
5180091	Artemia franciscana	Artemia franciscana Kellogg, 1906	Animalia	Arthropoda	Branchiopoda	Artemiidae	Freshwater; Brackish	Unknown		present	introduced		GRIIS	non native	Menioui (2021)		Yes	no data			native to North America
5180090	Artemia monica	Artemia monica Verrill, 1869	Animalia	Arthropoda	Branchiopoda	Artemiidae	Marine	Unknown			Alien	invasive	no data	non native	Mghili et al. (2024)		No	no data			native to North America
3120790	Artemisia verlotiorum	Artemisia verlotiorum Lamotte	Plantae	Tracheophyta	Magnoliopsida	Asteraceae	Terrestrial		Herb							Yes	Yes	No	26	El Jamaai list; GBIF Morocco; WCVP; GRIIS		No
2703041	Arundo donax	Arundo donax L.	Plantae	Tracheophyta	Liliopsida	Poaceae	Terrestrial		Herb							Yes	No	Yes	91	El Jamaai list; BIEN; GBIF Morocco; WCVP; BIEN-native; GRIIS; GISD; GRIIS, GISD		Yes
3170241	Asclepias curassavica	Asclepias curassavica L.	Plantae	Tracheophyta	Magnoliopsida	Apocynaceae	Terrestrial		Herb							Yes	Yes	No	61	El Jamaai list; iNaturalist; BIEN; GBIF Morocco; WCVP; BIEN-native; GRIIS		Yes
2768763	Asparagus aethiopicus	Asparagus aethiopicus L.	Plantae	Tracheophyta	Liliopsida	Asparagaceae	Terrestrial		Herb							Yes	No	No	7	Literature; iNaturalist; GRIIS ; Added: Buanani, R., et al. "INVENTORY OF ORNAMENTAL PLANTS AT THE CAMPUS OF IBN TOFAIL UNIVERSITY, KENITRA (MOROCCO)." Plant Archives 20.2 (2020): 1108-1113.	Keep: from literature	No
2768367	Asparagus asparagoides	Asparagus asparagoides (L.) Druce	Plantae	Tracheophyta	Liliopsida	Asparagaceae	Terrestrial		Herb							Yes	Yes	No	16	El Jamaai list; GBIF Morocco; GRIIS		No
2768885	Asparagus officinalis	Asparagus officinalis L.	Plantae	Tracheophyta	Liliopsida	Asparagaceae	Terrestrial		Herb							Yes	No	Yes	24	BIEN; GBIF Morocco; WCVP; BIEN-native; GRIIS; GISD; GRIIS, GISD	Keep: Non-native (Source: BIEN and WCVP)	No
2226998	Astacus astacus	Astacus astacus (Linnaeus, 1758)	Animalia	Arthropoda	Malacostraca	Astacidae		Unknown		present			FirstRecords	introduced			No	no data			introduced according to https://www.iucnredlist.org/species/2191/9338388 consulted 10/03/2025
5393680	Asteriscus sericeus	Asteriscus sericeus (L.fil.) DC.	Plantae	Tracheophyta	Magnoliopsida	Asteraceae	Terrestrial		Herb							Yes	Yes	No	1	El Jamaai list; WCVP; GRIIS		No
2411944	Atherina boyeri	Atherina boyeri Risso, 1810	Animalia	Chordata		Atherinidae	Freshwater; Brackish; Marine	Unknown		present			GRIIS	no access			Yes	no data			https://www.catalogueoflife.org/data/taxon/688WN
3083750	Atriplex canescens	Atriplex canescens (Pursh) Nutt.	Plantae	Tracheophyta	Magnoliopsida	Amaranthaceae	Terrestrial		Herb							Yes	Yes	No	3	El Jamaai list; GBIF Morocco; WCVP; GRIIS		No
3083652	Atriplex nummularia	Atriplex nummularia Lindl.	Plantae	Tracheophyta	Magnoliopsida	Amaranthaceae	Terrestrial		Herb							Yes	Yes	No	14	El Jamaai list; GBIF Morocco; WCVP; GRIIS		No
3083667	Atriplex semibaccata	Atriplex semibaccata R.Br.	Plantae	Tracheophyta	Magnoliopsida	Amaranthaceae	Terrestrial		Herb							Yes	Yes	No	20	El Jamaai list; iNaturalist; BIEN; GBIF Morocco; WCVP; BIEN-native; GRIIS		No
3083771	Atriplex suberecta	Atriplex suberecta I.Verd.	Plantae	Tracheophyta	Magnoliopsida	Amaranthaceae	Terrestrial		Herb							Yes	Yes	No	11	El Jamaai list; BIEN; GBIF Morocco; WCVP; BIEN-native; GRIIS		No
2264442	Aurelia aurita	Aurelia aurita (Linnaeus, 1758)	Animalia	Cnidaria	Scyphozoa	Ulmaridae	Marine	Unknown					no data	no access	Menioui (2021)		No	no data			https://doris.ffessm.fr/Especes/Aurelia-spp.-Aurelie-129
3951322	Austrocylindropuntia cylindrica	Austrocylindropuntia cylindrica (Lam.) Backeb.	Plantae	Tracheophyta	Magnoliopsida	Cactaceae	Terrestrial		Shrub		introduced		GloNAF	invasive		Yes	No	No	5	El Jamaai list; iNaturalist; GBIF Morocco; WCVP; GRIIS	Keep: Non-native (Source: WCVP)	No
7282135	Austrocylindropuntia subulata	Austrocylindropuntia subulata (Muehlenpf.) Backeb.	Plantae	Tracheophyta	Magnoliopsida	Cactaceae	Terrestrial		Shrub		introduced		GloNAF	introduced		Yes	No	No	14	El Jamaai list; iNaturalist; BIEN; GBIF Morocco; WCVP; BIEN-native; GRIIS	Keep: Non-native (Source: WCVP)	No
2705292	Avena byzantina	Avena byzantina K.Koch	Plantae	Tracheophyta	Liliopsida	Poaceae	Terrestrial		Herb							Yes	No	No	3	BIEN; GBIF Morocco; WCVP; BIEN-native; GRIIS	Keep: Non-native (Source: BIEN and WCVP)	No
2650107	Azolla filiculoides	Azolla filiculoides Lam.	Plantae	Tracheophyta	Polypodiopsida	Salviniaceae	Terrestrial		Herb							Yes	Yes	No	63	El Jamaai list; iNaturalist; BIEN; GBIF Morocco; WCVP; BIEN-native; GRIIS		Yes
8070510	Bactrocera cucurbitae	Bactrocera cucurbitae (Coquillett, 1899)	Animalia	Arthropoda	Insecta	Tephritidae		Herbivore						not present	Ben Yazid et al 2020						Confirmed by Dr Kawtar Kettani <kettani.ka@gmail.com>
7930834	Bactrocera dorsalis	Bactrocera dorsalis (Hendel, 1912)	Animalia	Arthropoda	Insecta	Tephritidae		Herbivore					no data	not present	Ben Yazid et al 2020		No	no data			Confirmed by Dr Kawtar Kettani <kettani.ka@gmail.com>
8021093	Bactrocera zonata	Bactrocera zonata (Saunders, 1842)	Animalia	Arthropoda	Insecta	Tephritidae		Herbivore					no data	not present	Ben Yazid et al 2020		No	no data			Keep: Non-native (Source: BIEN and WCVP)
2705757	Bambusa multiplex	Bambusa multiplex (Lour.) Raeusch. ex Schult.f.	Plantae	Tracheophyta	Liliopsida	Poaceae	Terrestrial		Herb							Yes	No	No	11	iNaturalist; GRIIS		No
5739539	Barbus barbus	Barbus barbus (Linnaeus, 1758)	Animalia	Chordata		Cyprinidae	Freshwater	Omnivore		present	introduced	established	FirstRecords; GRIIS	no access			Yes	no data			non native https://www.iucnredlist.org/species/2561/58293571#geographic-range
5568213	Bassia indica	Bassia indica (Wight) A.J.Scott	Plantae	Tracheophyta	Magnoliopsida	Amaranthaceae	Terrestrial		Herb							Yes	Yes	No	3	El Jamaai list; GBIF Morocco; WCVP; GRIIS		No
5383936	Bassia scoparia	Bassia scoparia (L.) A.J.Scott	Plantae	Tracheophyta	Magnoliopsida	Amaranthaceae	Terrestrial		Herb							Yes	Yes	No	25	El Jamaai list; BIEN; GBIF Morocco; WCVP; BIEN-native; GRIIS		No
2953871	Bauhinia purpurea	Bauhinia purpurea L.	Plantae	Tracheophyta	Magnoliopsida	Fabaceae	Terrestrial		Herb							Yes	No	No	25	iNaturalist; GRIIS		No
2953251	Bauhinia variegata	Bauhinia variegata L.	Plantae	Tracheophyta	Magnoliopsida	Fabaceae	Terrestrial		Herb							Yes	No	No	26	iNaturalist; GBIF Morocco; GRIIS		No
2012126	Bemisia tabaci	Bemisia tabaci (Gennadius, 1889)	Animalia	Arthropoda	Insecta	Aleyrodidae	Terrestrial	Unknown					no data	present	Menioui (2021)		No	non native			Alien in Africa https://www.iucngisd.org/gisd/species.php?sc=106# https://ephytia.inra.fr/fr/C/19235/Biocontrol-Bemisia-tabaci-Aleurode-du-tabac
5391802	Bidens aurea	Bidens aurea (Aiton) Sherff	Plantae	Tracheophyta	Magnoliopsida	Asteraceae	Terrestrial		Herb							Yes	Yes	No	11	El Jamaai list; iNaturalist; BIEN; GBIF Morocco; WCVP; BIEN-native; GRIIS		No
5392174	Bidens frondosa	Bidens frondosa L.	Plantae	Tracheophyta	Magnoliopsida	Asteraceae	Terrestrial		Herb							Yes	No	No	33	BIEN; GBIF Morocco; WCVP; BIEN-native; GRIIS	Keep: Non-native (Source: BIEN and WCVP)	No
5391845	Bidens pilosa	Bidens pilosa L.	Plantae	Tracheophyta	Magnoliopsida	Asteraceae	Terrestrial		Herb							Yes	Yes	Yes	91	El Jamaai list; BIEN; GBIF Morocco; WCVP; BIEN-native; GRIIS; GISD; GRIIS, GISD		Yes
2615895	Bipolaris hawaiiensis	Bipolaris hawaiiensis (Bugnic. ex M.B.Ellis) J.Y.Uchida & Aragaki	Fungi	Ascomycota	Dothideomycetes	Pleosporaceae	Terrestrial						no data	no data	Menioui (2021)		No	no data			introduced according to http://www.israbat.ac.ma/wp-content/uploads/2016/01/1-%20Lamrani%20et%20al.%20(1-7).pdf
2332084	Botrylloides niger	Botrylloides niger Herdman, 1886	Animalia	Chordata	Ascidiacea	Styelidae	Marine	Unknown			Alien		no data	no data	Mghili et al. (2024)		No	no data			https://www.marinespecies.org/ascidiacea/aphia.php?p=taxdetails&id=252289#distributions
5553651	Bougainvillea buttiana	Bougainvillea Ã— buttiana Holttum & Standl.	Plantae	Tracheophyta	Magnoliopsida	Nyctaginaceae	Terrestrial		Herb							Yes	No	No	1	Literature; GRIIS ; Added: Buanani, R., et al. "INVENTORY OF ORNAMENTAL PLANTS AT THE CAMPUS OF IBN TOFAIL UNIVERSITY, KENITRA (MOROCCO)." Plant Archives 20.2 (2020): 1108-1113.		No
5384862	Bougainvillea glabra	Bougainvillea glabra Choisy	Plantae	Tracheophyta	Magnoliopsida	Nyctaginaceae	Terrestrial		Herb							Yes	No	No	15	Literature; BIEN; GBIF Morocco; BIEN-native; GRIIS ; Added: Buanani, R., et al. "INVENTORY OF ORNAMENTAL PLANTS AT THE CAMPUS OF IBN TOFAIL UNIVERSITY, KENITRA (MOROCCO)." Plant Archives 20.2 (2020): 1108-1113.	Keep: from literature	No
7167078	Bougainvillea spectabilis	Bougainvillea spectabilis Willd.	Plantae	Tracheophyta	Magnoliopsida	Nyctaginaceae	Terrestrial		Herb							Yes	No	No	19	Literature; GBIF Morocco; GRIIS ; Added: Buanani, R., et al. "INVENTORY OF ORNAMENTAL PLANTS AT THE CAMPUS OF IBN TOFAIL UNIVERSITY, KENITRA (MOROCCO)." Plant Archives 20.2 (2020): 1108-1113.	Keep: from literature	No
7323035	Brachychiton populneus	Brachychiton populneus (Schott & Endl.) R.Br.	Plantae	Tracheophyta	Magnoliopsida	Malvaceae	Terrestrial		Herb							Yes	No	No	5	Literature; GRIIS ; Added: Buanani, R., et al. "INVENTORY OF ORNAMENTAL PLANTS AT THE CAMPUS OF IBN TOFAIL UNIVERSITY, KENITRA (MOROCCO)." Plant Archives 20.2 (2020): 1108-1113.		No
5200315	Branchiomma luctuosum	Branchiomma luctuosum (Grube, 1870)	Animalia	Annelida	Polychaeta	Sabellidae	Marine	Unknown			alien	invasive	no data	not present	Mghili et al. (2024)		No	no data			confirmed in Morocco https://doi.org/10.1007/s41208-021-00348-7
3042636	Brassica napus	Brassica napus L.	Plantae	Tracheophyta	Magnoliopsida	Brassicaceae	Terrestrial		Herb							Yes	No	No	27	BIEN; GBIF Morocco; WCVP; BIEN-native; GRIIS	Keep: Non-native (Source: BIEN and WCVP)	No
3042845	Brassica oleracea	Brassica oleracea L.	Plantae	Tracheophyta	Magnoliopsida	Brassicaceae	Terrestrial		Herb							Yes	No	No	32	BIEN; GBIF Morocco; WCVP; BIEN-native; GRIIS	Keep: Non-native (Source: BIEN and WCVP)	No
2703723	Bromus catharticus	Bromus catharticus Vahl	Plantae	Tracheophyta	Liliopsida	Poaceae	Terrestrial		Herb							Yes	Yes	No	37	El Jamaai list; BIEN; GBIF Morocco; WCVP; BIEN-native; GRIIS		No
5689641	Bryophyllum fedtschenkoi	Bryophyllum fedtschenkoi (Raym.-Hamet & Perr.) Lauz.-March.	Plantae	Tracheophyta	Magnoliopsida	Crassulaceae	Terrestrial		Herb							Yes	No	No	8	Literature; GRIIS ; Added: Buanani, R., et al. "INVENTORY OF ORNAMENTAL PLANTS AT THE CAMPUS OF IBN TOFAIL UNIVERSITY, KENITRA (MOROCCO)." Plant Archives 20.2 (2020): 1108-1113.	Keep: from literature	No
3173338	Buddleja davidii	Buddleja davidii Franch.	Plantae	Tracheophyta	Magnoliopsida	Scrophulariaceae	Terrestrial		Herb							Yes	No	Yes	37	iNaturalist; GBIF Morocco; GRIIS; GISD; GRIIS, GISD		No
9680062	Bursatella leachii	Bursatella leachii Blainville, 1817	Animalia	Mollusca	Gastropoda	Aplysiidae	Marine	Herbivore		present	introduced	established	GRIIS	no data	Menioui (2021); Mghili et al. (2024)		Yes	no data
2958521	Caesalpinia spinosa	Caesalpinia spinosa (Molina) Kuntze	Plantae	Tracheophyta	Magnoliopsida	Fabaceae	Terrestrial		Herb							Yes	No	No	6	BIEN; GBIF Morocco; BIEN-native; GRIIS	Keep: Non-native (Source: POW), note that in POW it is 'Tara spinosa'	No
5391480	Calendula officinalis	Calendula officinalis L.	Plantae	Tracheophyta	Magnoliopsida	Asteraceae	Terrestrial		Herb							Yes	Yes	No	34	El Jamaai list; BIEN; GBIF Morocco; WCVP; BIEN-native; GRIIS		No
2225646	Callinectes sapidus	Callinectes sapidus Rathbun, 1896	Animalia	Arthropoda	Malacostraca	Portunidae	Marine	Unknown			Alien	invasive	no data	not present	Mghili et al. (2024)		No				https://www.marinespecies.org/aphia.php?p=taxdetails&id=107379#distributions
3173413	Callistemon citrinus	Callistemon citrinus (Curtis) Skeels	Plantae	Tracheophyta	Magnoliopsida	Myrtaceae	Terrestrial		Herb							Yes	No	No	5	BIEN; GBIF Morocco; BIEN-native; GRIIS	Keep: Non-native (Source: POW), note that in POW it is 'Melaleuca citrina'	No
3173353	Callistemon viminalis	Callistemon viminalis (Sol. ex Gaertn.) G.Don	Plantae	Tracheophyta	Magnoliopsida	Myrtaceae	Terrestrial		Herb							Yes	No	No	4	Literature; GBIF Morocco; GRIIS ; Added: Buanani, R., et al. "INVENTORY OF ORNAMENTAL PLANTS AT THE CAMPUS OF IBN TOFAIL UNIVERSITY, KENITRA (MOROCCO)." Plant Archives 20.2 (2020): 1108-1113.	Keep: from literature	No
6005579	Calopertha subretusa	Calopertha subretusa (Ancey, 1881)	Animalia	Arthropoda	Insecta	Bostrichidae	Terrestrial	Herbivore					no data	no data	Menioui (2021)		No	no data			confirmed by Dr YOUSRA BENYAHIA <benyahia.y@ucd.ac.ma>
3172549	Campsis radicans	Campsis radicans (L.) Bureau	Plantae	Tracheophyta	Magnoliopsida	Bignoniaceae	Terrestrial		Herb							Yes	No	No	14	iNaturalist; BIEN; GBIF Morocco; BIEN-native; GRIIS		No
8034409	Canna indica	Canna indica L.	Plantae	Tracheophyta	Liliopsida	Cannaceae	Terrestrial		Herb							Yes	No	Yes	72	iNaturalist; GRIIS; GISD; GRIIS, GISD		Yes
5361880	Cannabis sativa	Cannabis sativa L.	Plantae	Tracheophyta	Magnoliopsida	Cannabaceae	Terrestrial		Herb							Yes	No	No	37	BIEN; GBIF Morocco; WCVP; BIEN-native; GRIIS	Keep: Non-native (Source: BIEN and WCVP)	No
5178082	Caprella scaura	Caprella scaura Templeton, 1836	Animalia	Arthropoda	Malacostraca	Caprellidae	Marine	Unknown		present	introduced	invasive	GRIIS	not present	Mghili et al. (2024)		Yes	no data
2932944	Capsicum annuum	Capsicum annuum L.	Plantae	Tracheophyta	Magnoliopsida	Solanaceae	Terrestrial		Herb							Yes	No	No	39	BIEN; GBIF Morocco; WCVP; BIEN-native; GRIIS	Keep: Non-native (Source: BIEN and WCVP)	No
4286942	Carassius auratus	Carassius auratus (Linnaeus, 1758)	Animalia	Chordata		Cyprinidae	Freshwater; Brackish	Omnivore		present	introduced		GRIIS	not present			Yes	non native			https://www.catalogueoflife.org/data/taxon/68ZXN
2418002	Carcharhinus altimus	Carcharhinus altimus (Springer, 1950)	Animalia	Chordata	Elasmobranchii	Carcharhinidae		Unknown		present	introduced	established	FirstRecords	no data			No	no data			introduced according to https://www.fao.org/fishery/en/introsp/8428/en consulted 10/03/2025
3046076	Cardamine flexuosa	Cardamine flexuosa With.	Plantae	Tracheophyta	Magnoliopsida	Brassicaceae	Terrestrial		Herb							Yes	No	Yes	15	Literature; GBIF Morocco; GRIIS; GISD; GRIIS, GISD ; Added: Sukhorukov, A. P., Lâ€šÃ Ã¶Â¬Â©ger, J. F., & Chambouleyron, M. (2023). Two new species alien to the flora of Morocco: Amaranthus spinosus (Amaranthaceae) and Cardamine occulta (Brassicaceae). Flora Mediterranea, 33, 31-38.		No
1317116	Cardiocondyla emeryi	Cardiocondyla emeryi Forel, 1881	Animalia	Arthropoda	Insecta	Formicidae	Terrestrial	Omnivore		present	introduced	established	FirstRecords; GRIIS	not present			Yes	no data			Confirmed by Dr Ahmed Taheri taheri.ahmed@ucd.ac.ma
8384845	Cardiocondyla obscurior	Cardiocondyla obscurior Wheeler, 1929	Animalia	Arthropoda	Insecta	Formicidae		Omnivore						no data	Benyahia et al. (2024)			no data			Confirmed by Dr Ahmed Taheri taheri.ahmed@ucd.ac.ma
3189939	Cardiospermum halicacabum	Cardiospermum halicacabum L.	Plantae	Tracheophyta	Magnoliopsida	Sapindaceae	Terrestrial		Herb							Yes	No	No	33	Literature; GRIIS ; Added: LâˆšÂ©ger, J.-F., Chambouleyron, M., Herment, P.-C., Verloove, F., Chatelain, C., Mombrial, F., Andrieu, F., Homrani Bakali, A., & Tanji, A. (2025). Contribution âˆšâ€ la connaissance de la flore du Maroc, notamment de plantes exogâˆšÂ®nes naturalisâˆšÂ©es. Carnets botaniques, 266. https://doi.org/10.34971/A41W-AC41		No
3703606	Carpobrotus acinaciformis	Carpobrotus acinaciformis (L.) L.Bolus	Plantae	Tracheophyta	Magnoliopsida	Aizoaceae	Terrestrial		Herb							Yes	Yes	No	10	El Jamaai list; iNaturalist; BIEN; GBIF Morocco; WCVP; BIEN-native; GRIIS		No
3084844	Carpobrotus chilensis	Carpobrotus chilensis (Molina) N.E.Br.	Plantae	Tracheophyta	Magnoliopsida	Aizoaceae	Terrestrial		Herb							Yes	No	No	4	iNaturalist; GBIF Morocco; GRIIS		No
3084842	Carpobrotus edulis	Carpobrotus edulis (L.) N.E.Br.	Plantae	Tracheophyta	Magnoliopsida	Aizoaceae	Terrestrial		Herb	present				introduced	Sahara and Sahel Observatory (2020)	Yes	No	Yes	29	El Jamaai list; iNaturalist; BIEN; GBIF Morocco; WCVP; BIEN-native; GRIIS; GISD; GRIIS, GISD	Keep: Non-native (Source: BIEN and WCVP)	No
3138327	Carthamus tinctorius	Carthamus tinctorius L.	Plantae	Tracheophyta	Magnoliopsida	Asteraceae	Terrestrial		Herb							Yes	No	No	25	BIEN; GBIF Morocco; WCVP; BIEN-native; GRIIS	Keep: Non-native (Source: BIEN and WCVP)	No
4990525	Cassida nebulosa	Cassida nebulosa Linnaeus, 1758	Animalia	Arthropoda	Insecta	Chrysomelidae	Terrestrial	Herbivore					no data	no data	Menioui (2021)		No	no data			confirmed by Dr YOUSRA BENYAHIA <benyahia.y@ucd.ac.ma>
5333294	Castanea sativa	Castanea sativa Mill.	Plantae	Tracheophyta	Magnoliopsida	Fagaceae	Terrestrial		Herb							Yes	No	No	15	BIEN; GBIF Morocco; WCVP; BIEN-native; GRIIS	Keep: Non-native (Source: BIEN and WCVP)	No
2891932	Casuarina cunninghamiana	Casuarina cunninghamiana Miq.	Plantae	Tracheophyta	Magnoliopsida	Casuarinaceae	Terrestrial		Tree							Yes	No	No	31	iNaturalist; GBIF Morocco; WCVP; GRIIS	Keep: Non-native (Source: WCVP)	No
3169830	Catharanthus roseus	Catharanthus roseus (L.) G.Don	Plantae	Tracheophyta	Magnoliopsida	Apocynaceae	Terrestrial		Herb							Yes	No	No	94	Literature; GBIF Morocco; GRIIS ; Added: Buanani, R., et al. "INVENTORY OF ORNAMENTAL PLANTS AT THE CAMPUS OF IBN TOFAIL UNIVERSITY, KENITRA (MOROCCO)." Plant Archives 20.2 (2020): 1108-1113.	Keep: from literature	Yes
1797333	Catocala nymphagoga	Catocala nymphagoga Esper, 1787	Animalia	Arthropoda	Insecta	Erebidae		Unknown					no data	no data	Sahara and Sahel Observatory (2020)		No	no data			present but origine not confimed
8688929	Ceiba speciosa	Ceiba speciosa (A.St.-Hil., A.Juss. & Cambess.) Ravenna	Plantae	Tracheophyta	Magnoliopsida	Malvaceae	Terrestrial		Herb							Yes	No	No	2	iNaturalist; GRIIS		No
5289731	Cenchrus longispinus	Cenchrus longispinus (Hack.) Fernald	Plantae	Tracheophyta	Liliopsida	Poaceae	Terrestrial		Herb							Yes	Yes	No	10	El Jamaai list; GBIF Morocco; WCVP; GRIIS		No
3127691	Centaurea benedicta	Centaurea benedicta (L.) L.	Plantae	Tracheophyta	Magnoliopsida	Asteraceae	Terrestrial		Herb	present	introduced		GRIIS			Yes	Yes	No	8	El Jamaai list; GBIF Morocco; WCVP; GRIIS	Keep: Non-native (Source: WCVP)	No
8355821	Cephalaria syriaca	Cephalaria syriaca (L.) Schrad.	Plantae	Tracheophyta	Magnoliopsida	Caprifoliaceae	Terrestrial		Herb		introduced		GloNAF	present		Yes	No	No	7	El Jamaai list; WCVP; GRIIS	Keep: Non-native (Source: WCVP)	No
1626096	Ceratitis capitata	Ceratitis capitata (Wiedemann, 1824)	Animalia	Arthropoda	Insecta	Tephritidae	Terrestrial	Herbivore					no data		Menioui (2021); Sahara and Sahel Observatory (2020)		No	Yes			non native according to https://www.invasivespeciesinfo.gov/terrestrial/invertebrates/mediterranean-fruit-fly consulted 10/03/2025
5384000	Cereus hildmannianus	Cereus hildmannianus K.Schum.	Plantae	Tracheophyta	Magnoliopsida	Cactaceae	Terrestrial		Shrub							Yes	No	No	3	Literature; GRIIS ; Added: Buanani, R., et al. "INVENTORY OF ORNAMENTAL PLANTS AT THE CAMPUS OF IBN TOFAIL UNIVERSITY, KENITRA (MOROCCO)." Plant Archives 20.2 (2020): 1108-1113.	Keep: from literature	No
2440954	Cervus nippon	Cervus nippon Temminck, 1838	Animalia	Chordata	Mammalia	Cervidae		Unknown		present			FirstRecords	absent			No	non native			introduced according to https://animaldiversity.org/accounts/Cervus_nippon/#geographic_range consulted 17/03/25
6403186	Cestrum elegans	Cestrum elegans (Brongn. ex Neumann) Schltdl.	Plantae	Tracheophyta	Magnoliopsida	Solanaceae	Terrestrial		Herb							Yes	No	No	9	BIEN; GBIF Morocco; BIEN-native; GRIIS	Keep: Non-native (Source: POW)	No
3000679	Chaenomeles speciosa	Chaenomeles speciosa (Sweet) Nakai	Plantae	Tracheophyta	Magnoliopsida	Rosaceae	Terrestrial		Herb							Yes	No	No	1	iNaturalist; GBIF Morocco; GRIIS		No
3083843	Chenopodium bonus-henricus	Chenopodium bonus-henricus L.	Plantae	Tracheophyta	Magnoliopsida	Amaranthaceae	Terrestrial		Herb							Yes	Yes	No	9	El Jamaai list; GBIF Morocco; WCVP; BIEN-native; GRIIS		No
3083862	Chenopodium ficifolium	Chenopodium ficifolium Sm.	Plantae	Tracheophyta	Magnoliopsida	Amaranthaceae	Terrestrial		Herb							Yes	No	No	9	Literature; GRIIS ; Added: Tanji, A. (2023). Two new annual weeds in Morocco: Amaranthus palmeri and Chenopodium ficifolium subsp. ficifolium (Amaranthaceae) Abstract. Flora Mediterranea, 33.	Keep: from literature	No
3756077	Chenopodium giganteum	Chenopodium giganteum D.Don	Plantae	Tracheophyta	Magnoliopsida	Amaranthaceae	Terrestrial		Herb	present	introduced		GRIIS			Yes	Yes	No	13	El Jamaai list; GBIF Morocco; WCVP; GRIIS	Keep: Non-native (Source: WCVP)	No
4648609	Cherax quadricarinatus	Cherax quadricarinatus (von Martens, 1868)	Animalia	Arthropoda	Malacostraca	Parastacidae		Unknown		present			FirstRecords	introduced			No	no data			non native according to https://www.iucnredlist.org/species/4621/11041003#geographic-range consulted 17/03/25
5289618	Chloris gayana	Chloris gayana Kunth	Plantae	Tracheophyta	Liliopsida	Poaceae	Terrestrial		Herb	present	introduced		GRIIS			Yes	Yes	No	28	El Jamaai list; BIEN; GBIF Morocco; WCVP; BIEN-native; GRIIS	Keep: Non-native (Source: WCVP)	No
2774846	Chlorophytum comosum	Chlorophytum comosum (Thunb.) Jacques	Plantae	Tracheophyta	Liliopsida	Asparagaceae	Terrestrial		Herb							Yes	No	No	13	Literature; GBIF Morocco; GRIIS ; Added: Buanani, R., et al. "INVENTORY OF ORNAMENTAL PLANTS AT THE CAMPUS OF IBN TOFAIL UNIVERSITY, KENITRA (MOROCCO)." Plant Archives 20.2 (2020): 1108-1113.	Keep: from literature	No
3044349	Chorispora tenella	Chorispora tenella (Pall.) DC.	Plantae	Tracheophyta	Magnoliopsida	Brassicaceae	Terrestrial		Herb							Yes	No	No	17	Literature; GBIF Morocco; GRIIS ; Added: Bakali, A. H., Lâ€šÃ Ã¶Â¬Â©ger, J. F., & Mombrial, F. (2024). Chorispora tenella (Brassicaceae), alien naturalized in Morocco: comparison with similar-looking species. Flora Mediterranea, 34.	Keep: from literature	No
2073544	Cinara cupressi	Cinara cupressi (Buckton, 1881)	Animalia	Arthropoda	Insecta	Aphididae		Herbivore		present	introduced		FirstRecords	invasive	Sahara and Sahel Observatory (2020)		No	non native			Present introduced and invasive according to https://www.cabidigitallibrary.org/doi/10.1079/cabicompendium.13579 consulted 17/03/25
7647136	Citrus limon	Citrus Ã— limon (L.) Osbeck	Plantae	Tracheophyta	Magnoliopsida	Rutaceae	Terrestrial		Herb							Yes	No	No	27	Literature; BIEN; GBIF Morocco; BIEN-native; GRIIS ; Added: Buanani, R., et al. "INVENTORY OF ORNAMENTAL PLANTS AT THE CAMPUS OF IBN TOFAIL UNIVERSITY, KENITRA (MOROCCO)." Plant Archives 20.2 (2020): 1108-1113.	Keep: from literature	No
5186058	Clytia linearis	Clytia linearis (Thorneley, 1900)	Animalia	Cnidaria	Hydrozoa	Campanulariidae	Marine	Unknown			Alien	established	no data		Mghili et al. (2024)		No				present according to https://www.marinespecies.org/aphia.php?p=taxdetails&id=117370#distributions and non native according to https://www.sealifebase.ca/Country/CountryList.php?ID=43478&GenusName=Clytia&SpeciesName=linearis consulted 17/03/25
5330776	Colocasia esculenta	Colocasia esculenta (L.) Schott	Plantae	Tracheophyta	Liliopsida	Araceae	Terrestrial		Herb	present	introduced		GRIIS			Yes	Yes	No	77	El Jamaai list; BIEN; GBIF Morocco; WCVP; BIEN-native; GRIIS	Keep: Non-native (Source: BIEN and WCVP)	Yes
3197970	Colpomenia peregrina	Colpomenia peregrina Sauv.	Chromista	Ochrophyta	Phaeophyceae	Scytosiphonaceae	Marine				alien	established	no data	present	Mghili et al. (2024)		No				non native according to https://www.sealifebase.ca/Country/CountryList.php?ID=119797&GenusName=Colpomenia&SpeciesName=peregrina and present invasive according to https://www.marinespecies.org/aphia.php?p=taxdetails&id=145856#distributions consulted 17/03/25
8190231	Corbicula fluminea	Corbicula fluminea (O.F.MÃ¼ller, 1774)	Animalia	Mollusca	Bivalvia	Cyrenidae	Freshwater	Filter-feeder		present	introduced		GRIIS	introduced	Menioui (2021)		Yes	non native			non native according to https://www.sealifebase.ca/Country/CountryList.php?ID=48777&GenusName=Corbicula&SpeciesName=fluminea and introduced according to https://www.iucnredlist.org/species/155736/735697#geographic-range consulted 17/03/25
3152084	Corchorus olitorius	Corchorus olitorius L.	Plantae	Tracheophyta	Magnoliopsida	Malvaceae	Terrestrial		Herb	present	introduced		GRIIS		Menioui (2021); Sahara and Sahel Observatory (2020)	Yes	Yes	No	21	El Jamaai list; WCVP; GRIIS	Keep: Non-native (Source: WCVP)	No
3034871	Coriandrum sativum	Coriandrum sativum L.	Plantae	Tracheophyta	Magnoliopsida	Apiaceae	Terrestrial		Herb	present	introduced		GRIIS			Yes	Yes	No	49	El Jamaai list; BIEN; GBIF Morocco; WCVP; BIEN-native; GRIIS	Keep: Non-native (Source: BIEN and WCVP)	No
2704523	Cortaderia selloana	Cortaderia selloana (Schult. & Schult.f.) Asch. & Graebn.	Plantae	Tracheophyta	Liliopsida	Poaceae	Terrestrial		Herb	present	introduced		GRIIS			Yes	Yes	Yes	28	El Jamaai list; iNaturalist; GBIF Morocco; WCVP; GRIIS; GISD; GRIIS, GISD	Keep: Non-native (Source: WCVP)	No
2482499	Corvus splendens	Corvus splendens Vieillot, 1817	Animalia	Chordata	Aves	Corvidae	Terrestrial	Unknown		present	introduced; uncertain	established	FirstRecords; GAVIA	absent			No	Yes			present but not established according to https://avibase.bsc-eoc.org/species.jsp?lang=FR&avibaseid=3986890399CA4859&sec=map
5418434	Corymbia ficifolia	Corymbia ficifolia (F.Muell.) K.D.Hill & L.A.S.Johnson	Plantae	Tracheophyta	Magnoliopsida	Myrtaceae	Terrestrial		Herb							Yes	No	No	2	iNaturalist; GRIIS		No
3112110	Cotula coronopifolia	Cotula coronopifolia L.	Plantae	Tracheophyta	Magnoliopsida	Asteraceae	Terrestrial		Herb	present	introduced		GloNAF; GRIIS			Yes	Yes	No	15	El Jamaai list; iNaturalist; BIEN; GBIF Morocco; WCVP; BIEN-native; GRIIS	Keep: Non-native (Source: BIEN and WCVP)	No
5192789	Crepidula fornicata	Crepidula fornicata (Linnaeus, 1758)	Animalia	Mollusca	Gastropoda	Calyptraeidae	Marine	Herbivore			alien		no data	not present	Menioui (2021); Mghili et al. (2024)		No	non native			non native according to https://www.sealifebase.ca/Country/CountryList.php?ID=4754&GenusName=Crepidula&SpeciesName=fornicata and present according to https://www.marinespecies.org/aphia.php?p=taxdetails&id=138963#distributions consulted 17/03/25
1212134	Cryphalus piceae	Cryphalus piceae Wood & Bright, 1992	Animalia	Arthropoda	Insecta	Curculionidae	Terrestrial	Herbivore					no data	no access	Menioui (2021) cited as Cryphalus picaeae		No	no data			confirmed by Dr YOUSRA BENYAHIA <benyahia.y@ucd.ac.ma>
2007322	Cryptotermes brevis	Cryptotermes brevis (Walker, 1853)	Animalia	Arthropoda	Insecta	Kalotermitidae		Unknown					no data		Najjari et al., 2023		No				Confirmed by Dr Ahmed Taheri taheri.ahmed@ucd.ac.ma
2362030	Ctenopharyngodon idella	Ctenopharyngodon idella (Valenciennes, 1844)	Animalia	Chordata		Cyprinidae	Freshwater; Brackish	Omnivore		present	introduced; vagrant	casual	FirstRecords; GRIIS	introduced	Menioui (2021)		Yes	Yes			introduced according tohttps://www.fishbase.org/country/CountryList.php?ID=79&GenusName=Ctenopharyngodon&SpeciesName=idella consulted 17/03/25
2874570	Cucumis melo	Cucumis melo L.	Plantae	Tracheophyta	Magnoliopsida	Cucurbitaceae	Terrestrial		Vine							Yes	No	No	29	BIEN; GBIF Morocco; WCVP; BIEN-native; GRIIS	Keep: Non-native (Source: BIEN and WCVP)	No
2874515	Cucurbita maxima	Cucurbita maxima Duchesne	Plantae	Tracheophyta	Magnoliopsida	Cucurbitaceae	Terrestrial		Vine							Yes	No	No	17	iNaturalist; BIEN; GBIF Morocco; BIEN-native; GRIIS		No
7393329	Cucurbita moschata	Cucurbita moschata (Duchesne) Duchesne ex Poir.	Plantae	Tracheophyta	Magnoliopsida	Cucurbitaceae	Terrestrial		Vine							Yes	No	No	11	iNaturalist; GBIF Morocco; GRIIS		No
3034775	Cuminum cyminum	Cuminum cyminum L.	Plantae	Tracheophyta	Magnoliopsida	Apiaceae	Terrestrial		Herb							Yes	No	No	5	BIEN; GBIF Morocco; WCVP; BIEN-native; GRIIS	Keep: Non-native (Source: BIEN and WCVP)	No
2683969	Cupressus arizonica	Cupressus arizonica Greene	Plantae	Tracheophyta	Pinopsida	Cupressaceae	Terrestrial		Tree							Yes	No	No	10	iNaturalist; GBIF Morocco; GRIIS		No
2684030	Cupressus sempervirens	Cupressus sempervirens L.	Plantae	Tracheophyta	Pinopsida	Cupressaceae	Terrestrial		Tree							Yes	No	No	16	BIEN; GBIF Morocco; WCVP; BIEN-native; GRIIS	Keep: Non-native (Source: BIEN and WCVP)	No
7154776	Cuscuta australis	Cuscuta australis R.Br.	Plantae	Tracheophyta	Magnoliopsida	Convolvulaceae	Terrestrial		Vine					no data	Sahara and Sahel Observatory (2020)	Yes	No	No	6	El Jamaai list; GBIF Morocco; WCVP; GRIIS	Keep: Non-native (Source: WCVP)	No
3610757	Cuscuta campestris	Cuscuta campestris Yunck.	Plantae	Tracheophyta	Magnoliopsida	Convolvulaceae	Terrestrial		Vine	present	introduced			introduced	Sahara and Sahel Observatory (2020)	Yes	No	No	79	El Jamaai list; iNaturalist; BIEN; GBIF Morocco; WCVP; BIEN-native; GRIIS	Keep: Non-native (Source: BIEN and WCVP)	Yes
2927498	Cuscuta indecora	Cuscuta indecora Choisy	Plantae	Tracheophyta	Magnoliopsida	Convolvulaceae	Terrestrial		Vine							Yes	No	No	2	BIEN; GBIF Morocco; WCVP; BIEN-native; GRIIS	Keep: Non-native (Source: BIEN and WCVP)	No
2927490	Cuscuta pentagona	Cuscuta pentagona Engelm.	Plantae	Tracheophyta	Magnoliopsida	Convolvulaceae	Terrestrial		Vine							Yes	No	No	67	El Jamaai list; GRIIS		Yes
5422862	Cutleria multifida	Cutleria multifida (Turner) Grev.	Chromista	Ochrophyta	Phaeophyceae	Cutleriaceae	Marine				alien	casual	no data		Mghili et al. (2024)		No				Alien according to https://www.marinespecies.org/aphia.php?p=taxdetails&id=145297#distributions present according to https://www.algaebase.org/search/species/detail/?species_id=55 consulted 17/03/25
5386012	Cyanus segetum	Cyanus segetum Hill	Plantae	Tracheophyta	Magnoliopsida	Asteraceae	Terrestrial		Herb							Yes	Yes	No	12	El Jamaai list; WCVP; GRIIS		No
1737847	Cydia pomonella	Cydia pomonella (Linnaeus, 1758)	Animalia	Arthropoda	Insecta	Tortricidae	Terrestrial	Unknown					no data	no access	Menioui (2021)		No	no data			non native according to https://www.afromoths.net/species/19292 consulted 17/03/25
5362215	Cydonia oblonga	Cydonia oblonga Mill.	Plantae	Tracheophyta	Magnoliopsida	Rosaceae	Terrestrial		Herb							Yes	No	No	19	BIEN; GBIF Morocco; WCVP; BIEN-native; GRIIS	Keep: Non-native (Source: BIEN and WCVP)	No
6381277	Cylindropuntia imbricata	Cylindropuntia imbricata (Haw.) F.M.Knuth	Plantae	Tracheophyta	Magnoliopsida	Cactaceae	Terrestrial		Shrub							Yes	No	No	8	iNaturalist; GBIF Morocco; WCVP; GRIIS	Keep: Non-native (Source: WCVP)	No
8200663	Cymbalaria muralis	Cymbalaria muralis G.Gaertn., B.Mey. & Scherb.	Plantae	Tracheophyta	Magnoliopsida	Plantaginaceae	Terrestrial		Herb		introduced		GloNAF	not present		Yes	No	No	29	El Jamaai list; iNaturalist; GBIF Morocco; WCVP; GRIIS	Keep: Non-native (Source: WCVP)	No
2714796	Cyperus difformis	Cyperus difformis L.	Plantae	Tracheophyta	Liliopsida	Cyperaceae	Terrestrial		Herb	present	introduced		GRIIS		Sahara and Sahel Observatory (2020)	Yes	Yes	No	38	El Jamaai list; GBIF Morocco; WCVP; GRIIS	Keep: Non-native (Source: WCVP)	No
2715482	Cyperus eragrostis	Cyperus eragrostis Lam.	Plantae	Tracheophyta	Liliopsida	Cyperaceae	Terrestrial		Herb							Yes	No	No	25	Literature; BIEN; GBIF Morocco; BIEN-native; GRIIS ; Added: Khabbach, Abdelmajid, Mohamed Libiad, and Abdeslam Ennabili. "An updated checklist of the wetland vascular flora from Morocco." Moroccan Journal of Biology 17 (2020): 1-35	Keep: from literature	No
4286975	Cyprinus carpio	Cyprinus carpio Linnaeus, 1758	Animalia	Chordata		Cyprinidae	Freshwater; Brackish	Omnivore		present	introduced	established	FirstRecords; GRIIS		Menioui (2021)		Yes	Yes			introduced according to https://www.fishbase.org/country/CountryList.php?ID=1450&GenusName=Cyprinus&SpeciesName=carpio consulted 17/03/25
2090121	Dactylopius opuntiae	Dactylopius opuntiae (Cockerell, 1896)	Animalia	Arthropoda	Insecta	Dactylopiidae	Terrestrial	Unknown					no data	no access	Menioui (2021)		No	no data			present according to Sabbahi, R., Hock, V. Control of the prickly pear cochineal, Dactylopius opuntiae (Cockerell), in Morocco: an overview. J Plant Dis Prot 129, 1323â€“1330 (2022). https://doi.org/10.1007/s41348-022-00655-y
1625914	Dacus frontalis	Dacus frontalis Becker, 1922	Animalia	Arthropoda	Insecta	Tephritidae	Terrestrial	Herbivore					no data	no access	Sahara and Sahel Observatory (2020)		No	no data			Confirmed by Dr Kawtar Kettani <kettani.ka@gmail.com>
2704854	Dasypyrum villosum	Dasypyrum villosum (L.) BorbÃ¡s	Plantae	Tracheophyta	Liliopsida	Poaceae	Terrestrial		Herb							Yes	No	No	5	BIEN; GBIF Morocco; WCVP; BIEN-native; GRIIS	Keep: Non-native (Source: BIEN and WCVP)	No
7894250	Datura ferox	Datura ferox L.	Plantae	Tracheophyta	Magnoliopsida	Solanaceae	Terrestrial		Herb							Yes	No	No	24	Literature; GRIIS ; Added: Tanji, A. (2023). Two new weeds in Morocco: Ambrosia psilostachya (Asteraceae) and Datura ferox (Solanaceae). Flora Mediterranea, 33.	Keep: from literature	No
2928755	Datura innoxia	Datura innoxia Mill.	Plantae	Tracheophyta	Magnoliopsida	Solanaceae	Terrestrial		Herb							Yes	No	No	75	iNaturalist; GBIF Morocco; WCVP; GRIIS	Keep: Non-native (Source: WCVP)	Yes
2928747	Datura metel	Datura metel L.	Plantae	Tracheophyta	Magnoliopsida	Solanaceae	Terrestrial		Herb		introduced		GloNAF	not present		Yes	No	No	30	El Jamaai list; GBIF Morocco; WCVP; GRIIS	Keep: Non-native (Source: WCVP)	No
2928751	Datura stramonium	Datura stramonium L.	Plantae	Tracheophyta	Magnoliopsida	Solanaceae	Terrestrial		Herb		introduced		GloNAF	introduced		Yes	No	No	103	El Jamaai list; iNaturalist; BIEN; GBIF Morocco; WCVP; BIEN-native; GRIIS	Keep: Non-native (Source: BIEN and WCVP)	Yes
2956176	Delonix regia	Delonix regia (Bojer ex Hook.) Raf.	Plantae	Tracheophyta	Magnoliopsida	Fabaceae	Terrestrial		Herb							Yes	No	No	94	iNaturalist; GBIF Morocco; GRIIS		Yes
10656713	Deudorix livia	Deudorix livia (Klug, 1834)	Animalia	Arthropoda	Insecta	Lycaenidae		Unknown					no data	no data	Sahara and Sahel Observatory (2020)		No	no data			probable presence non native https://doi.org/10.1111/epp.12478
2614063	Didymella fabae	Didymella fabae G.J.Jellis & Punith.	Fungi	Ascomycota	Dothideomycetes	Didymellaceae				present	introduced	invasive	no data	invasive	Sahara and Sahel Observatory (2020)		No	no data			introduced invasive according to https://www.cabidigitallibrary.org/doi/full/10.1079/cabicompendium.7304 consulted 17/03/25
1095721	Dinoderus minutus	Dinoderus minutus (Fabricius, 1775)	Animalia	Arthropoda	Insecta	Bostrichidae	Terrestrial	Herbivore					no data	not present	Menioui (2021) cited as Diniderus minutus		No	no data			Keep: Non-native (Source: WCVP)
3084850	Disphyma crassifolium	Disphyma crassifolium (L.) L.Bolus	Plantae	Tracheophyta	Magnoliopsida	Aizoaceae	Terrestrial		Herb	present	introduced		GRIIS			Yes	Yes	No	6	El Jamaai list; WCVP; GRIIS	Keep: Non-native (Source: WCVP)	No
3084872	Drosanthemum floribundum	Drosanthemum floribundum (Haw.) Schwantes	Plantae	Tracheophyta	Magnoliopsida	Aizoaceae	Terrestrial		Herb	present	introduced		GRIIS			Yes	Yes	No	8	El Jamaai list; WCVP; GRIIS	Keep: Non-native (Source: WCVP)	No
2925655	Duranta erecta	Duranta erecta L.	Plantae	Tracheophyta	Magnoliopsida	Verbenaceae	Terrestrial		Herb							Yes	No	No	44	Literature; iNaturalist; BIEN; GBIF Morocco; BIEN-native; GRIIS ; Added: Buanani, R., et al. "INVENTORY OF ORNAMENTAL PLANTS AT THE CAMPUS OF IBN TOFAIL UNIVERSITY, KENITRA (MOROCCO)." Plant Archives 20.2 (2020): 1108-1113.	Keep: from literature	No
5568446	Dysphania ambrosioides	Dysphania ambrosioides (L.) Mosyakin & Clemants	Plantae	Tracheophyta	Magnoliopsida	Amaranthaceae	Terrestrial		Herb							Yes	No	No	65	El Jamaai list; BIEN; Euro+Med; GRIIS	Keep: from literature	Yes
5568361	Dysphania multifida	Dysphania multifida (L.) Mosyakin & Clemants	Plantae	Tracheophyta	Magnoliopsida	Amaranthaceae	Terrestrial		Herb	present	introduced		GRIIS			Yes	Yes	No	15	El Jamaai list; BIEN; GBIF Morocco; WCVP; BIEN-native; GRIIS	Keep: Non-native (Source: WCVP)	No
2702820	Echinochloa oryzoides	Echinochloa oryzoides (Ard.) Fritsch	Plantae	Tracheophyta	Liliopsida	Poaceae	Terrestrial		Herb							Yes	No	No	16	El Jamaai list; GRIIS		No
2925892	Echium vulgare	Echium vulgare L.	Plantae	Tracheophyta	Magnoliopsida	Boraginaceae	Terrestrial		Herb							Yes	No	No	14	BIEN; GBIF Morocco; WCVP; BIEN-native; GRIIS	Keep: Non-native (Source: BIEN and WCVP)	No
5384950	Eclipta prostrata	Eclipta prostrata (L.) L.	Plantae	Tracheophyta	Magnoliopsida	Asteraceae	Terrestrial		Herb	present	introduced		GloNAF; GRIIS			Yes	Yes	No	43	El Jamaai list; BIEN; GBIF Morocco; WCVP; BIEN-native; GRIIS	Keep: Non-native (Source: BIEN and WCVP)	No
2702863	Ehrharta erecta	Ehrharta erecta Lam.	Plantae	Tracheophyta	Liliopsida	Poaceae	Terrestrial		Herb	present	introduced		GRIIS			Yes	Yes	No	9	El Jamaai list; BIEN; GBIF Morocco; WCVP; BIEN-native; GRIIS	Keep: Non-native (Source: WCVP)	No
2765940	Eichhornia crassipes	Eichhornia crassipes (Mart.) Solms	Plantae	Tracheophyta	Liliopsida	Pontederiaceae	Terrestrial		Herb							Yes	No	Yes	119	Literature; iNaturalist; GBIF Morocco; GRIIS; GISD; GRIIS, GISD ; Added: LâˆšÂ©ger, J.-F., Chambouleyron, M., Herment, P.-C., Verloove, F., Chatelain, C., Mombrial, F., Andrieu, F., Homrani Bakali, A., & Tanji, A. (2025). Contribution âˆšâ€ la connaissance de la flore du Maroc, notamment de plantes exogâˆšÂ®nes naturalisâˆšÂ©es. Carnets botaniques, 266. https://doi.org/10.34971/A41W-AC40		Yes
3039269	Elaeagnus angustifolia	Elaeagnus angustifolia L.	Plantae	Tracheophyta	Magnoliopsida	Elaeagnaceae	Terrestrial		Herb		introduced		GloNAF			Yes	No	Yes	25	El Jamaai list; GBIF Morocco; WCVP; GRIIS; GISD; GRIIS, GISD	Keep: Non-native (Source: WCVP)	No
2705953	Eleusine indica	Eleusine indica (L.) Gaertn.	Plantae	Tracheophyta	Liliopsida	Poaceae	Terrestrial		Herb	present	introduced		GRIIS		Sahara and Sahel Observatory (2020)	Yes	Yes	No	117	El Jamaai list; BIEN; GBIF Morocco; WCVP; BIEN-native; GRIIS	Keep: Non-native (Source: WCVP)	Yes
6005630	Enneadesmus forficula	Enneadesmus forficula (Fairmaire, 1883)	Animalia	Arthropoda	Insecta	Bostrichidae	Terrestrial	Herbivore					no data	no data	Menioui (2021)		No	no data			Keep: Non-native (Source: WCVP)
4427559	Enneadesmus trispinosus	Enneadesmus trispinosus (Olivier, 1795)	Animalia	Arthropoda	Insecta	Bostrichidae	Terrestrial	Herbivore					no data	no data	Menioui (2021)		No	no data			Keep: Non-native (Source: BIEN and WCVP)
1745794	Epinotia algeriensis	Epinotia algeriensis Chambon, 1990	Animalia	Arthropoda	Insecta	Tortricidae	Terrestrial	Unknown					no data	no data	Menioui (2021)		No	no data			present in Morocco according to https://www.eje.cz/pdfs/eje/1997/04/11.pdf
1745813	Epinotia cedricida	Epinotia cedricida Diakonoff, 1969	Animalia	Arthropoda	Insecta	Tortricidae	Terrestrial	Unknown					no data	no data	Menioui (2021)		No	no data			present in Morocco according to https://www.eje.cz/pdfs/eje/1997/04/11.pdf
2705378	Eragrostis curvula	Eragrostis curvula (Schrad.) Nees	Plantae	Tracheophyta	Liliopsida	Poaceae	Terrestrial		Herb	present	introduced		GRIIS			Yes	Yes	No	17	El Jamaai list; GBIF Morocco; WCVP; GRIIS	Keep: Non-native (Source: WCVP)	No
3146717	Erigeron bonariensis	Erigeron bonariensis L.	Plantae	Tracheophyta	Magnoliopsida	Asteraceae	Terrestrial		Herb	present	introduced		GRIIS			Yes	Yes	No	62	El Jamaai list; iNaturalist; BIEN; GBIF Morocco; WCVP; BIEN-native; GRIIS	Keep: Non-native (Source: WCVP)	Yes
3146791	Erigeron canadensis	Erigeron canadensis L.	Plantae	Tracheophyta	Magnoliopsida	Asteraceae	Terrestrial		Herb	present	introduced		GRIIS			Yes	Yes	No	75	El Jamaai list; BIEN; GBIF Morocco; WCVP; BIEN-native; GRIIS	Keep: Non-native (Source: BIEN and WCVP)	Yes
3147168	Erigeron karvinskianus	Erigeron karvinskianus DC.	Plantae	Tracheophyta	Magnoliopsida	Asteraceae	Terrestrial		Herb	present	introduced		GloNAF; GRIIS			Yes	Yes	Yes	51	El Jamaai list; GBIF Morocco; WCVP; GRIIS; GISD; GRIIS, GISD	Keep: Non-native (Source: WCVP)	Yes
3146683	Erigeron sumatrensis	Erigeron sumatrensis Retz.	Plantae	Tracheophyta	Magnoliopsida	Asteraceae	Terrestrial		Herb	present	introduced		GloNAF; GRIIS			Yes	Yes	No	32	El Jamaai list; BIEN; GBIF Morocco; WCVP; BIEN-native; GRIIS	Keep: Non-native (Source: WCVP)	No
3024146	Eriobotrya japonica	Eriobotrya japonica (Thunb.) Lindl.	Plantae	Tracheophyta	Magnoliopsida	Rosaceae	Terrestrial		Herb							Yes	No	Yes	39	Literature; iNaturalist; BIEN; GBIF Morocco; BIEN-native; GRIIS; GISD; GRIIS, GISD ; Added: Buanani, R., et al. "INVENTORY OF ORNAMENTAL PLANTS AT THE CAMPUS OF IBN TOFAIL UNIVERSITY, KENITRA (MOROCCO)." Plant Archives 20.2 (2020): 1108-1113.	Keep: from literature	No
3222012	Erwinia amylovora	Erwinia amylovora (Burrill, 1882) Winslow et al., 1920	Bacteria	Proteobacteria	Gammaproteobacteria	Enterobacteriaceae	Terrestrial						no data	invasive	Sahara and Sahel Observatory (2020)		No	no data			introduced invasive according to https://www.cabidigitallibrary.org/doi/10.1079/cabicompendium.21908 consulted 18/03/25
3048203	Erysimum cheiri	Erysimum cheiri (L.) Crantz	Plantae	Tracheophyta	Magnoliopsida	Brassicaceae	Terrestrial		Herb							Yes	No	No	16	El Jamaai list; Euro+Med; GRIIS		No
5349557	Erythrina caffra	Erythrina caffra Thunb.	Plantae	Tracheophyta	Magnoliopsida	Fabaceae	Terrestrial		Herb							Yes	No	No	2	Literature; GBIF Morocco; GRIIS ; Added: Buanani, R., et al. "INVENTORY OF ORNAMENTAL PLANTS AT THE CAMPUS OF IBN TOFAIL UNIVERSITY, KENITRA (MOROCCO)." Plant Archives 20.2 (2020): 1108-1113.	Keep: from literature	No
2946477	Erythrostemon	Erythrostemon Klotzsch	Plantae	Tracheophyta	Magnoliopsida	Fabaceae			Herb
2888380	Eschscholzia californica	Eschscholzia californica Cham.	Plantae	Tracheophyta	Magnoliopsida	Papaveraceae	Terrestrial		Herb							Yes	No	No	29	iNaturalist; BIEN; GBIF Morocco; WCVP; BIEN-native; GRIIS	Keep: Non-native (Source: WCVP)	No
2346633	Esox lucius	Esox lucius Linnaeus, 1758	Animalia	Chordata		Esocidae	Freshwater; Brackish	Unknown		present	introduced	established	FirstRecords; GRIIS	introduced			Yes	Yes			introduced to Morocco according to https://www.iucnredlist.org/species/135631/58312794#geographic-range consulted 18/03/25
2346634	Esox masquinongy	Esox masquinongy Mitchill, 1824	Animalia	Chordata		Esocidae		Unknown		present	vagrant	casual	FirstRecords	no access	Menioui (2021)		No	no data			non native according to https://www.iucnredlist.org/species/202401/15363615#geographic-range consulted 18/03/25
8365316	Etrumeus golanii	Etrumeus golanii DiBattista, Randall & Bowen, 2012	Animalia	Chordata		Dussumieriidae	Marine	Unknown			alien	established	no data	no data	Menioui (2021); Mghili et al. (2024)		No	no data			non native according to https://www.iucnredlist.org/species/99167321/143843370#geographic-range consulted 18/03/25
11869920	Eucalyptus camaldulensis	Eucalyptus camaldulensis Denham	Plantae	Tracheophyta	Magnoliopsida	Myrtaceae	Terrestrial		Tree							Yes	No	No	74	iNaturalist; GBIF Morocco; WCVP; GRIIS	Keep: Non-native (Source: WCVP)	Yes
3176787	Eucalyptus globulus	Eucalyptus globulus Labill.	Plantae	Tracheophyta	Magnoliopsida	Myrtaceae	Terrestrial		Tree							Yes	No	No	36	iNaturalist; BIEN; GBIF Morocco; WCVP; BIEN-native; GRIIS	Keep: Non-native (Source: BIEN and WCVP)	No
3176772	Eucalyptus gomphocephala	Eucalyptus gomphocephala A.Cunn. ex DC.	Plantae	Tracheophyta	Magnoliopsida	Myrtaceae	Terrestrial		Tree							Yes	No	No	6	iNaturalist; BIEN; GBIF Morocco; WCVP; BIEN-native; GRIIS	Keep: Non-native (Source: BIEN and WCVP)	No
3177019	Eucalyptus leucoxylon	Eucalyptus leucoxylon F.Muell.	Plantae	Tracheophyta	Magnoliopsida	Myrtaceae	Terrestrial		Tree							Yes	No	No	3	iNaturalist; GBIF Morocco; GRIIS		No
3176835	Eucalyptus torquata	Eucalyptus torquata Luehm.	Plantae	Tracheophyta	Magnoliopsida	Myrtaceae	Terrestrial		Tree							Yes	No	No	3	BIEN; GBIF Morocco; WCVP; BIEN-native; GRIIS	Keep: Non-native (Source: BIEN and WCVP)	No
2266125	Eudendrium carneum	Eudendrium carneum Clarke, 1882	Animalia	Cnidaria	Hydrozoa	Eudendriidae	Marine	Unknown			alien	casual	no data		Mghili et al. (2024)		No				alien according to https://www.marinespecies.org/aphia.php?p=taxdetails&id=117545#distributions consulted 18/03/25
2266154	Eudendrium merulum	Eudendrium merulum Watson, 1985	Animalia	Cnidaria	Hydrozoa	Eudendriidae	Marine	Unknown			alien	established	no data		Mghili et al. (2024)		No				present according to https://www.marinespecies.org/aphia.php?p=taxdetails&id=117550#distributions consulted 18/03/25
3169137	Euonymus fortunei	Euonymus fortunei (Turcz.) Hand.-Mazz.	Plantae	Tracheophyta	Magnoliopsida	Celastraceae	Terrestrial		Herb							Yes	No	Yes	5	Literature; GRIIS; GISD; GRIIS, GISD ; Added: Buanani, R., et al. "INVENTORY OF ORNAMENTAL PLANTS AT THE CAMPUS OF IBN TOFAIL UNIVERSITY, KENITRA (MOROCCO)." Plant Archives 20.2 (2020): 1108-1113.		No
7102937	Euonymus japonicus	Euonymus japonicus Thunb.	Plantae	Tracheophyta	Magnoliopsida	Celastraceae	Terrestrial		Herb							Yes	No	No	11	Literature; GBIF Morocco; GRIIS ; Added: Buanani, R., et al. "INVENTORY OF ORNAMENTAL PLANTS AT THE CAMPUS OF IBN TOFAIL UNIVERSITY, KENITRA (MOROCCO)." Plant Archives 20.2 (2020): 1108-1113.	Keep: from literature	No
3064495	Euphorbia heterophylla	Euphorbia heterophylla L.	Plantae	Tracheophyta	Magnoliopsida	Euphorbiaceae	Terrestrial		Herb							Yes	No	No	71	El Jamaai list; GRIIS		Yes
3066321	Euphorbia hypericifolia	Euphorbia hypericifolia L.	Plantae	Tracheophyta	Magnoliopsida	Euphorbiaceae	Terrestrial		Herb							Yes	No	No	44	iNaturalist; GRIIS		No
3065912	Euphorbia hyssopifolia	Euphorbia hyssopifolia L.	Plantae	Tracheophyta	Magnoliopsida	Euphorbiaceae	Terrestrial		Herb							Yes	No	No	11	Literature; GRIIS ; Added: LâˆšÂ©ger, J.-F., Chambouleyron, M., Herment, P.-C., Verloove, F., Chatelain, C., Mombrial, F., Andrieu, F., Homrani Bakali, A., & Tanji, A. (2025). Contribution âˆšâ€ la connaissance de la flore du Maroc, notamment de plantes exogâˆšÂ®nes naturalisâˆšÂ©es. Carnets botaniques, 266. https://doi.org/10.34971/A41W-AC42		No
3067119	Euphorbia maculata	Euphorbia maculata L.	Plantae	Tracheophyta	Magnoliopsida	Euphorbiaceae	Terrestrial		Herb							Yes	No	No	36	iNaturalist; BIEN; GBIF Morocco; WCVP; BIEN-native; GRIIS	Keep: Non-native (Source: BIEN and WCVP)	No
3070346	Euphorbia nutans	Euphorbia nutans Lag.	Plantae	Tracheophyta	Magnoliopsida	Euphorbiaceae	Terrestrial		Herb		introduced		GloNAF	no access		Yes	No	No	17	El Jamaai list; BIEN; GBIF Morocco; WCVP; BIEN-native; GRIIS	Keep: Non-native (Source: BIEN and WCVP)	No
3067891	Euphorbia prostrata	Euphorbia prostrata Aiton	Plantae	Tracheophyta	Magnoliopsida	Euphorbiaceae	Terrestrial		Herb							Yes	No	No	67	iNaturalist; GBIF Morocco; GRIIS		Yes
3066465	Euphorbia pulcherrima	Euphorbia pulcherrima Willd. ex Klotzsch	Plantae	Tracheophyta	Magnoliopsida	Euphorbiaceae	Terrestrial		Herb							Yes	No	No	17	iNaturalist; GBIF Morocco; GRIIS		No
3064221	Euphorbia serpens	Euphorbia serpens Kunth	Plantae	Tracheophyta	Magnoliopsida	Euphorbiaceae	Terrestrial		Herb		introduced		GloNAF	no data		Yes	No	No	19	El Jamaai list; iNaturalist; BIEN; GBIF Morocco; WCVP; BIEN-native; GRIIS	Keep: Non-native (Source: BIEN and WCVP)	No
1152002	Eupogonius tomentosus	Eupogonius tomentosus (Haldeman, 1847)	Animalia	Arthropoda	Insecta	Cerambycidae	Terrestrial	Herbivore					no data				No				confirmed by Dr Sergi TrÃ³coli <sergitrocoli@gmail.com>
2129393	Eutetranychus orientalis	Eutetranychus orientalis (Klein, 1936)	Animalia	Arthropoda	Arachnida	Tetranychidae		Unknown					no data	no access	Sahara and Sahel Observatory (2020)		No	no data			non native according to https://www.gbif.org/species/159503765 consulted 18/03/25
4360288	Favorinus ghanensis	Favorinus ghanensis Edmunds, 1968	Animalia	Mollusca	Gastropoda	Facelinidae	Marine	Herbivore		present	introduced	casual	GRIIS	not present	Mghili et al. (2024)		Yes	no data			non native according to https://www.molluscabase.org/aphia.php?p=taxdetails&id=181245#distributions consulted 18/03/25
8909595	Faxonius limosus	Faxonius limosus (Rafinesque, 1817)	Animalia	Arthropoda	Malacostraca	Cambaridae	Freshwater	Omnivore		present	introduced		FirstRecords; GRIIS	introduced	Menioui (2021)		Yes	Yes			introduced to Morocco according tohttps://www.iucnredlist.org/species/153764/4541724#geographic-range consulted 18/03/25
5361932	Ficus benjamina	Ficus benjamina L.	Plantae	Tracheophyta	Magnoliopsida	Moraceae	Terrestrial		Herb							Yes	No	No	26	Literature; GRIIS ; Added: Buanani, R., et al. "INVENTORY OF ORNAMENTAL PLANTS AT THE CAMPUS OF IBN TOFAIL UNIVERSITY, KENITRA (MOROCCO)." Plant Archives 20.2 (2020): 1108-1113.		No
5361909	Ficus carica	Ficus carica L.	Plantae	Tracheophyta	Magnoliopsida	Moraceae	Terrestrial		Herb	present	introduced		GloNAF; GRIIS	native		Yes	Yes	No	33	El Jamaai list; iNaturalist; BIEN; GBIF Morocco; WCVP; BIEN-native; GRIIS	Keep: Non-native (Source: BIEN and WCVP)	No
7835333	Ficus elastica	Ficus elastica Roxb.	Plantae	Tracheophyta	Magnoliopsida	Moraceae	Terrestrial		Herb							Yes	No	No	26	El Jamaai list; BIEN; GBIF Morocco; BIEN-native; GRIIS		No
7467639	Ficus microcarpa	Ficus microcarpa L.fil.	Plantae	Tracheophyta	Magnoliopsida	Moraceae	Terrestrial		Herb							Yes	No	No	23	iNaturalist; GBIF Morocco; GRIIS		No
3765871	Ficus retusa	Ficus retusa L.	Plantae	Tracheophyta	Magnoliopsida	Moraceae	Terrestrial		Herb							Yes	No	No	1	Literature; GBIF Morocco; GRIIS ; Added: Buanani, R., et al. "INVENTORY OF ORNAMENTAL PLANTS AT THE CAMPUS OF IBN TOFAIL UNIVERSITY, KENITRA (MOROCCO)." Plant Archives 20.2 (2020): 1108-1113.	Keep: from literature	No
5200938	Fistularia commersonii	Fistularia commersonii RÃ¼ppell, 1838	Animalia	Chordata		Fistulariidae	Marine	Unknown					no data	not present	Menioui (2021)		No	no data			non native according to https://www.iucnredlist.org/species/18257780/115368874#geographic-range consulted 18/03/25
8351995	Frankliniella occidentalis	Frankliniella occidentalis (Pergande, 1895)	Animalia	Arthropoda	Insecta	Thripidae		Unknown		present			FirstRecords	invasive	Sahara and Sahel Observatory (2020)		No	no data			non native according to https://gd.eppo.int/download/doc/940_ds_FRANOC_fr.pdf
5712056	Fundulus heteroclitus	Fundulus heteroclitus (Linnaeus, 1766)	Animalia	Chordata		Fundulidae	Marine	Unknown			Alien	established	no data		Mghili et al. (2024)		No				non native according to https://www.fishbase.org/country/CountryList.php?ID=3192&GenusName=Fundulus&SpeciesName=heteroclitus and https://www.iucnredlist.org/species/189824/18236919#geographic-range consulted 18/03/25
8612172	Galenia secunda	Galenia secunda (L.fil.) Sond.	Plantae	Tracheophyta	Magnoliopsida	Aizoaceae	Terrestrial		Herb							Yes	No	No	1	BIEN; GBIF Morocco; BIEN-native; GRIIS	Keep: Non-native (Source: POW), note that in POW it is 'Aizoon secundum'	No
3132570	Galinsoga parviflora	Galinsoga parviflora Cav.	Plantae	Tracheophyta	Magnoliopsida	Asteraceae	Terrestrial		Herb							Yes	No	No	82	El Jamaai list; GBIF Morocco; GRIIS		Yes
8298495	Galinsoga quadriradiata	Galinsoga quadriradiata Ruiz & Pav.	Plantae	Tracheophyta	Magnoliopsida	Asteraceae	Terrestrial		Herb	present	introduced		GRIIS			Yes	Yes	No	48	El Jamaai list; WCVP; GRIIS	Keep: Non-native (Source: WCVP)	No
2350580	Gambusia affinis	Gambusia affinis (Baird & Girard, 1853)	Animalia	Chordata		Poeciliidae	Freshwater; Brackish	Unknown		present	introduced	established	FirstRecords; GRIIS	introduced	Menioui (2021)		Yes	Yes			non native according to https://www.iucnredlist.org/species/166562/58317114#geographic-range consulted 18/03/25
2350570	Gambusia holbrooki	Gambusia holbrooki Girard, 1859	Animalia	Chordata		Poeciliidae	Freshwater; Brackish	Unknown		present	introduced		FirstRecords; GRIIS	invasive	Menioui (2021)		Yes	non native			non native according to https://www.iucnredlist.org/species/202394/18232445#geographic-range consulted 18/03/26
3112455	Gazania rigens	Gazania rigens (L.) Gaertn.	Plantae	Tracheophyta	Magnoliopsida	Asteraceae	Terrestrial		Herb							Yes	No	No	4	Literature; GBIF Morocco; GRIIS ; Added: Buanani, R., et al. "INVENTORY OF ORNAMENTAL PLANTS AT THE CAMPUS OF IBN TOFAIL UNIVERSITY, KENITRA (MOROCCO)." Plant Archives 20.2 (2020): 1108-1113.	Keep: from literature	No
2013501	Glycaspis brimblecombei	Glycaspis brimblecombei Moore, 1964	Animalia	Arthropoda	Insecta	Aphalaridae	host	Unknown		present	introduced		GRIIS	present	Menioui (2021)		Yes	no data			non native according to DOI=10.3389/ffgc.2021.783603
4409628	Gobio gobio	Gobio gobio (Linnaeus, 1758)	Animalia	Chordata		Cyprinidae	Freshwater; Brackish	Omnivore		present	introduced	established	FirstRecords; GRIIS	no access			Yes	no data			introduced to Morocco according to https://www.iucnredlist.org/species/184448/137266233#geographic-range and https://www.fishbase.org/country/CountryList.php?ID=4478&GenusName=Gobio&SpeciesName=gobio consulted 18/03/25
4360294	Godiva quadricolor	Godiva quadricolor (Barnard, 1927)	Animalia	Mollusca	Gastropoda	Myrrhinidae	Marine	Herbivore			alien	established	no data	no data	Mghili et al. (2024)		No				alien in Morocco according to https://www.molluscabase.org/aphia.php?p=taxdetails&id=225518#distributions consulted 18/03/25
7150619	Gomphocarpus fruticosus	Gomphocarpus fruticosus (L.) W.T.Aiton	Plantae	Tracheophyta	Magnoliopsida	Apocynaceae	Terrestrial		Herb	present	introduced		GRIIS			Yes	Yes	No	24	El Jamaai list; BIEN; GBIF Morocco; WCVP; BIEN-native; GRIIS	Keep: Non-native (Source: WCVP)	No
2075434	Greenidea ficicola	Greenidea ficicola Takahashi, 1921	Animalia	Arthropoda	Insecta	Aphididae		Herbivore					no data	not present	Sahara and Sahel Observatory (2020)		No	no data			non native according to https://www.entomologicalsocietymalta.org/wp-content/uploads/2013/06/Vol1_Pub3b.pdf
5384466	Gypsophila elegans	Gypsophila elegans M.Bieb.	Plantae	Tracheophyta	Magnoliopsida	Caryophyllaceae	Terrestrial		Herb		introduced		GloNAF	no access		Yes	No	No	9	El Jamaai list; GBIF Morocco; WCVP; GRIIS	Keep: Non-native (Source: WCVP)	No
5384459	Gypsophila pilosa	Gypsophila pilosa Huds.	Plantae	Tracheophyta	Magnoliopsida	Caryophyllaceae	Terrestrial		Herb		introduced		GloNAF	not present		Yes	No	No	4	El Jamaai list; GBIF Morocco; WCVP; GRIIS	Keep: Non-native (Source: WCVP)	No
3036170	Hedera canariensis	Hedera canariensis Willd.	Plantae	Tracheophyta	Magnoliopsida	Araliaceae	Terrestrial		Herb							Yes	No	No	3	BIEN; GBIF Morocco; BIEN-native; GRIIS	Keep: Listed as introduced in BIEN	No
8351737	Hedera helix	Hedera helix L.	Plantae	Tracheophyta	Magnoliopsida	Araliaceae	Terrestrial		Herb	present	introduced		GRIIS			Yes	Yes	Yes	26	El Jamaai list; BIEN; GBIF Morocco; WCVP; BIEN-native; GRIIS; GISD; GRIIS, GISD	Keep: Non-native (Source: BIEN and WCVP)	No
9206251	Helianthus annuus	Helianthus annuus L.	Plantae	Tracheophyta	Magnoliopsida	Asteraceae	Terrestrial		Herb	present	introduced		GRIIS			Yes	Yes	No	36	El Jamaai list; iNaturalist; BIEN; GBIF Morocco; WCVP; BIEN-native; GRIIS	Keep: Non-native (Source: BIEN and WCVP)	No
8108800	Helicoverpa armigera	Helicoverpa armigera (HÃ¼bner, 1808)	Animalia	Arthropoda	Insecta	Noctuidae		Unknown					no data	present	Sahara and Sahel Observatory (2020)		No	no data			present according to https://gd.eppo.int/taxon/HELIAR/distribution/MA consulted 18/03/25
2925786	Heliotropium curassavicum	Heliotropium curassavicum L.	Plantae	Tracheophyta	Magnoliopsida	Heliotropiaceae	Terrestrial		Herb	present	introduced		GloNAF; GRIIS			Yes	Yes	Yes	20	El Jamaai list; GBIF Morocco; WCVP; GRIIS; GISD; GRIIS, GISD	Keep: Non-native (Source: WCVP)	No
2368968	Hemiramphus far	Hemiramphus far (ForsskÃ¥l, 1775)	Animalia	Chordata		Hemiramphidae	Marine	Unknown			alien	established	no data	not present	Mghili et al. (2024)		No				non native according to https://www.fishbase.org/country/CountryList.php?ID=5404&GenusName=Hemiramphus&SpeciesName=far consulted 18/03/25
1577153	Hermetia illucens	Hermetia illucens (Linnaeus, 1758)	Animalia	Arthropoda	Insecta	Stratiomyidae		Unknown					no data		Koutsoukous & Kasilas 2021		No				Confirmed by Dr Kawtar Kettani <kettani.ka@gmail.com>
3152559	Hibiscus rosa-sinensis	Hibiscus rosa-sinensis L.	Plantae	Tracheophyta	Magnoliopsida	Malvaceae	Terrestrial		Herb							Yes	No	No	28	Literature; GBIF Morocco; GRIIS ; Added: Buanani, R., et al. "INVENTORY OF ORNAMENTAL PLANTS AT THE CAMPUS OF IBN TOFAIL UNIVERSITY, KENITRA (MOROCCO)." Plant Archives 20.2 (2020): 1108-1113.		No
2351413	Hucho hucho	Hucho hucho (Linnaeus, 1758)	Animalia	Chordata		Salmonidae	Freshwater	Predator		present	introduced		GRIIS	no access			Yes	no data			introduced according to https://www.fishbase.org/country/CountryList.php?ID=4664&GenusName=Hucho&SpeciesName=hucho consulted 19/03/25
2985994	Hydrangea macrophylla	Hydrangea macrophylla (Thunb.) Ser.	Plantae	Tracheophyta	Magnoliopsida	Hydrangeaceae	Terrestrial		Herb							Yes	No	No	19	El Jamaai list; BIEN; GBIF Morocco; BIEN-native; GRIIS		No
5017488	Hylurgus micklitzi	Hylurgus micklitzi F.A.Wachtl, 1881	Animalia	Arthropoda	Insecta	Curculionidae	Terrestrial	Herbivore					no data	no access	Menioui (2021)		No	no data			confirmed by Dr YOUSRA BENYAHIA <benyahia.y@ucd.ac.ma>
1219245	Hypoborus ficus	Hypoborus ficus Erichson, 1836	Animalia	Arthropoda	Insecta	Curculionidae	Terrestrial	Herbivore					no data	no data	Menioui (2021)		No	no data			confirmed by Dr YOUSRA BENYAHIA <benyahia.y@ucd.ac.ma>
2362473	Hypophthalmichthys molitrix	Hypophthalmichthys molitrix (Valenciennes, 1844)	Animalia	Chordata		Cyprinidae	Freshwater; Brackish	Omnivore		present	introduced	established	FirstRecords; GRIIS	introduced	Menioui (2021)		Yes	Yes			non native according to https://www.iucnredlist.org/species/166081/6168056#geographic-range and https://www.catalogueoflife.org/data/taxon/6MR5M consulted 19/03/25
1326634	Hypoponera punctatissima	Hypoponera punctatissima (Roger, 1859)	Animalia	Arthropoda	Insecta	Formicidae	Terrestrial	Omnivore		present	introduced	established	FirstRecords; GRIIS	not present			Yes	no data			Confirmed by Dr Ahmed Taheri taheri.ahmed@ucd.ac.ma
3172647	Ibicella lutea	Ibicella lutea (Lindl.) Van Eselt.	Plantae	Tracheophyta	Magnoliopsida	Martyniaceae	Terrestrial		Herb							Yes	No	No	5	El Jamaai list; GRIIS		No
2080592	Icerya purchasi	Icerya purchasi Maskell, 1879	Animalia	Arthropoda	Insecta	Margarodidae		Unknown					no data	invasive	Sahara and Sahel Observatory (2020)		No	non native			present in Morocco according to http://scalenet.info/catalogue/Icerya%20purchasi/ and from australian origin according to https://books.google.co.ma/books?id=QvOPufXCJq0C&pg=PA221&redir_esc=y#v=onepage&q&f=false consulted 19/03/25
2928551	Ipomoea batatas	Ipomoea batatas (L.) Lam.	Plantae	Tracheophyta	Magnoliopsida	Convolvulaceae	Terrestrial		Vine							Yes	No	No	44	iNaturalist; GBIF Morocco; WCVP; GRIIS	Keep: Non-native (Source: WCVP)	No
2928598	Ipomoea indica	Ipomoea indica (Burm.) Merr.	Plantae	Tracheophyta	Magnoliopsida	Convolvulaceae	Terrestrial		Vine							Yes	No	No	45	Literature; iNaturalist; GBIF Morocco; WCVP; GRIIS ; Added: LâˆšÂ©ger, J.-F., Chambouleyron, M., Herment, P.-C., Verloove, F., Chatelain, C., Mombrial, F., Andrieu, F., Homrani Bakali, A., & Tanji, A. (2025). Contribution âˆšâ€ la connaissance de la flore du Maroc, notamment de plantes exogâˆšÂ®nes naturalisâˆšÂ©es. Carnets botaniques, 266. https://doi.org/10.34971/A41W-AC40	Keep: Non-native (Source: WCVP)	No
2928576	Ipomoea purpurea	Ipomoea purpurea (L.) Roth	Plantae	Tracheophyta	Magnoliopsida	Convolvulaceae	Terrestrial		Vine							Yes	No	No	54	iNaturalist; GBIF Morocco; GRIIS		Yes
2928547	Ipomoea triloba	Ipomoea triloba L.	Plantae	Tracheophyta	Magnoliopsida	Convolvulaceae	Terrestrial		Vine							Yes	No	No	37	Literature; GRIIS ; Added: LâˆšÂ©ger, J.-F., Chambouleyron, M., Herment, P.-C., Verloove, F., Chatelain, C., Mombrial, F., Andrieu, F., Homrani Bakali, A., & Tanji, A. (2025). Contribution âˆšâ€ la connaissance de la flore du Maroc, notamment de plantes exogâˆšÂ®nes naturalisâˆšÂ©es. Carnets botaniques, 266. https://doi.org/10.34971/A41W-AC43		No
5298598	Iris albicans	Iris albicans Lange	Plantae	Tracheophyta	Liliopsida	Iridaceae	Terrestrial		Herb							Yes	Yes	No	13	El Jamaai list; BIEN; GBIF Morocco; BIEN-native; GRIIS		No
5298190	Iris lutescens	Iris lutescens Lam.	Plantae	Tracheophyta	Liliopsida	Iridaceae	Terrestrial		Herb	present	introduced		GRIIS; GloNAF			Yes	Yes	No	2	El Jamaai list; GBIF Morocco; WCVP; GRIIS	Keep: Non-native (Source: WCVP)	No
5374118	Isatis tinctoria	Isatis tinctoria L.	Plantae	Tracheophyta	Magnoliopsida	Brassicaceae	Terrestrial		Herb							Yes	No	No	16	BIEN; GBIF Morocco; WCVP; BIEN-native; GRIIS	Keep: Non-native (Source: BIEN and WCVP)	No
3172499	Jacaranda mimosifolia	Jacaranda mimosifolia D.Don	Plantae	Tracheophyta	Magnoliopsida	Bignoniaceae	Terrestrial		Herb							Yes	No	No	32	Literature; iNaturalist; GBIF Morocco; GRIIS ; Added: Buanani, R., et al. "INVENTORY OF ORNAMENTAL PLANTS AT THE CAMPUS OF IBN TOFAIL UNIVERSITY, KENITRA (MOROCCO)." Plant Archives 20.2 (2020): 1108-1113.	Keep: from literature	No
3073017	Jatropha integerrima	Jatropha integerrima Jacq.	Plantae	Tracheophyta	Magnoliopsida	Euphorbiaceae	Terrestrial		Herb							Yes	No	No	7	iNaturalist; GBIF Morocco; GRIIS		No
3054368	Juglans regia	Juglans regia L.	Plantae	Tracheophyta	Magnoliopsida	Juglandaceae	Terrestrial		Herb							Yes	No	No	21	BIEN; GBIF Morocco; WCVP; BIEN-native; GRIIS	Keep: Non-native (Source: BIEN and WCVP)	No
2985936	Kalanchoe daigremontiana	Kalanchoe daigremontiana Raym.-Hamet & H.Perrier	Plantae	Tracheophyta	Magnoliopsida	Crassulaceae	Terrestrial		Herb							Yes	No	No	21	Literature; GBIF Morocco; WCVP; GRIIS ; Added: Buanani, R., et al. "INVENTORY OF ORNAMENTAL PLANTS AT THE CAMPUS OF IBN TOFAIL UNIVERSITY, KENITRA (MOROCCO)." Plant Archives 20.2 (2020): 1108-1113.	Keep: from literature	No
8595864	Laccaria fraterna	Laccaria fraterna (Sacc.) Pegler	Fungi	Basidiomycota	Agaricomycetes	Hydnangiaceae					introduced		MacroFungi	no data			No	no data			non native according to https://ultimate-mushroom.com/poisonous/739-laccaria-fraterna.html#:~:text=Laccaria%20fraterna%20is%20a%20species,white%20mycelium%20at%20the%20base. Consulted 19/03/25
5248679	Lactarius blennius	Lactarius blennius (Fr.) Fr.	Fungi	Basidiomycota	Agaricomycetes	Russulaceae					introduced		MacroFungi	no data			No	no data			native to europe
7279388	Lagunaria patersonia	Lagunaria patersonia (Andrews) G.Don	Plantae	Tracheophyta	Magnoliopsida	Malvaceae	Terrestrial		Herb							Yes	No	No	1	BIEN; GBIF Morocco; BIEN-native; GRIIS	Keep: Non-native (Source: POW)	No
3705230	Lampranthus multiradiatus	Lampranthus multiradiatus (Jacq.) N.E.Br.	Plantae	Tracheophyta	Magnoliopsida	Aizoaceae	Terrestrial		Herb	present	introduced		GRIIS			Yes	Yes	No	4	El Jamaai list; WCVP; GRIIS	Keep: Non-native (Source: WCVP)	No
2925303	Lantana camara	Lantana camara L.	Plantae	Tracheophyta	Magnoliopsida	Verbenaceae	Terrestrial		Shrub							Yes	No	Yes	123	El Jamaai list; iNaturalist; BIEN; GBIF Morocco; BIEN-native; GRIIS; GISD; GRIIS, GISD		Yes
2393184	Lates niloticus	Lates niloticus (Linnaeus, 1758)	Animalia	Chordata		Latidae	Freshwater	Unknown		present	vagrant	casual	FirstRecords	introduced	Menioui (2021)		No	non native			non native according to https://www.iucnredlist.org/species/181839/84244538#geographic-range consulted 19/03/25
2217379	Laticorophium baconi	Laticorophium baconi (Shoemaker, 1934)	Animalia	Arthropoda	Malacostraca	Corophiidae	Marine	Unknown			Alien	established	no data		Mghili et al. (2024)		No				alien according to https://www.marinespecies.org/amphipoda/aphia.php?p=taxdetails&id=421577#distributions consulted 19/03/25
2867614	Lemna minuta	Lemna minuta Kunth	Plantae	Tracheophyta	Liliopsida	Araceae	Terrestrial		Herb							Yes	No	No	20	Literature; GRIIS ; Added: LâˆšÂ©ger, J.-F., Chambouleyron, M., Herment, P.-C., Verloove, F., Chatelain, C., Mombrial, F., Andrieu, F., Homrani Bakali, A., & Tanji, A. (2025). Contribution âˆšâ€ la connaissance de la flore du Maroc, notamment de plantes exogâˆšÂ®nes naturalisâˆšÂ©es. Carnets botaniques, 266. https://doi.org/10.34971/A41W-AC44		No
5377060	Lepidium didymum	Lepidium didymum L.	Plantae	Tracheophyta	Magnoliopsida	Brassicaceae	Terrestrial		Herb		introduced		GloNAF	not present		Yes	No	No	41	El Jamaai list; GBIF Morocco; WCVP; GRIIS	Keep: Non-native (Source: WCVP)	No
5376816	Lepidium perfoliatum	Lepidium perfoliatum L.	Plantae	Tracheophyta	Magnoliopsida	Brassicaceae	Terrestrial		Herb							Yes	No	No	15	BIEN; GBIF Morocco; WCVP; BIEN-native; GRIIS	Keep: Non-native (Source: BIEN and WCVP)	No
5376616	Lepidium ruderale	Lepidium ruderale L.	Plantae	Tracheophyta	Magnoliopsida	Brassicaceae	Terrestrial		Herb		introduced		GloNAF	not present		Yes	No	No	17	El Jamaai list; WCVP; GRIIS	Keep: Non-native (Source: WCVP)	No
5376565	Lepidium sativum	Lepidium sativum L.	Plantae	Tracheophyta	Magnoliopsida	Brassicaceae	Terrestrial		Herb							Yes	No	No	30	BIEN; GBIF Morocco; WCVP; BIEN-native; GRIIS	Keep: Non-native (Source: BIEN and WCVP)	No
2394494	Lepomis cyanellus	Lepomis cyanellus Rafinesque, 1819	Animalia	Chordata		Centrarchidae	Freshwater	Predator		present	introduced		GRIIS	introduced	Menioui (2021)		Yes	no data			non antive according to https://www.iucnredlist.org/species/61248/58309866#geographic-range and introduced according to https://www.fishbase.org/country/CountryList.php?ID=3371&GenusName=Lepomis&SpeciesName=cyanellus consulted 20/03/25
2394486	Lepomis gibbosus	Lepomis gibbosus (Linnaeus, 1758)	Animalia	Chordata		Centrarchidae	Freshwater; Brackish	Predator		present	introduced	established	FirstRecords; GRIIS	introduced	Menioui (2021)		Yes	no data			non native according to https://www.iucnredlist.org/species/202555/18237003 and introduced according to https://www.fishbase.org/country/CountryList.php?ID=3372&GenusName=Lepomis&SpeciesName=gibbosus consulted 20/03/2025
2394503	Lepomis macrochirus	Lepomis macrochirus Rafinesque, 1819	Animalia	Chordata		Centrarchidae	Freshwater	Predator		present	introduced		GRIIS	introduced	Menioui (2021)		Yes	no data			introduced according to https://www.iucnredlist.org/species/61260/58309944 and https://www.fishbase.org/country/CountryList.php?ID=3375&GenusName=Lepomis&SpeciesName=macrochirus consulted 20/03/2025
2394501	Lepomis microlophus	Lepomis microlophus (GÃ¼nther, 1859)	Animalia	Chordata		Centrarchidae	Freshwater	Predator		present	introduced		GRIIS	not present	Menioui (2021)		Yes	no data			non native according to https://www.iucnredlist.org/species/202558/18230237#geographic-range and introduced according to https://www.fishbase.org/country/CountryList.php?ID=3378&GenusName=Lepomis&SpeciesName=microlophus consulted 20/03/2025
1380757	Leptocybe invasa	Leptocybe invasa Fisher & La Salle, 2004	Animalia	Arthropoda	Insecta	Eulophidae	Terrestrial	Unknown		present	introduced		GRIIS	invasive	Menioui (2021); Sahara and Sahel Observatory (2020)		Yes	no data			confirmed by Dr YOUSRA BENYAHIA <benyahia.y@ucd.ac.ma>
5156102	Leptoglossus occidentalis	Leptoglossus occidentalis Heidemann, 1910	Animalia	Arthropoda	Insecta	Coreidae	host	Unknown		present	introduced		GRIIS	introduced	Sahara and Sahel Observatory (2020)		Yes	no data			introduced to Morocco according to Gapon, Dmitry. (2015). First record of Leptoglossus occidentalis (Heteroptera: Coreidae) in Morocco. Heteropterus Revista de EntomologÃ­a. 15. 161â€“163.
2970418	Leucaena leucocephala	Leucaena leucocephala (Lam.) de Wit	Plantae	Tracheophyta	Magnoliopsida	Fabaceae	Terrestrial		Herb							Yes	No	Yes	153	El Jamaai list; iNaturalist; GBIF Morocco; GRIIS; GISD; GRIIS, GISD		Yes
5161985	Leucaspis pusilla	Leucaspis pusilla LÃ¶w, 1883	Animalia	Arthropoda	Insecta	Diaspididae	Terrestrial	Unknown					no data	no access	Menioui (2021) cited as Leucapsis pusilla		No	no data			Present in Morocco according to https://www.catalogueoflife.org/data/taxon/6Q3YR consulted 20/03/2025
3172297	Ligustrum lucidum	Ligustrum lucidum W.T.Aiton	Plantae	Tracheophyta	Magnoliopsida	Oleaceae	Terrestrial		Herb							Yes	No	Yes	23	iNaturalist; GRIIS; GISD; GRIIS, GISD		No
3172291	Ligustrum ovalifolium	Ligustrum ovalifolium Hassk.	Plantae	Tracheophyta	Magnoliopsida	Oleaceae	Terrestrial		Herb							Yes	No	No	11	Literature; GBIF Morocco; GRIIS ; Added: Buanani, R., et al. "INVENTORY OF ORNAMENTAL PLANTS AT THE CAMPUS OF IBN TOFAIL UNIVERSITY, KENITRA (MOROCCO)." Plant Archives 20.2 (2020): 1108-1113.	Keep: from literature	No
1420626	Limothrips cerealium	Limothrips cerealium (Haliday, 1836)	Animalia	Arthropoda	Insecta	Thripidae		Unknown					no data	no access	Sahara and Sahel Observatory (2020)		No	no data			present in Morocco according to https://thripsnet.zoologie.uni-halle.de/key-server-neu/data/0a0b0a0e-0d03-4106-8306-08060a080902/media/Html/Limothrips%20cerealium.html consulted 20/03/2025
1316908	Linepithema humile	Linepithema humile (Mayr, 1868)	Animalia	Arthropoda	Insecta	Formicidae	Terrestrial	Omnivore		present	introduced	established	FirstRecords; GRIIS	not present			Yes	non native			Confirmed by Dr Ahmed Taheri taheri.ahmed@ucd.ac.ma
2873861	Linum usitatissimum	Linum usitatissimum L.	Plantae	Tracheophyta	Magnoliopsida	Linaceae	Terrestrial		Herb	present	introduced		GRIIS			Yes	Yes	No	29	El Jamaai list; BIEN; GBIF Morocco; WCVP; BIEN-native; GRIIS	Keep: Non-native (Source: BIEN and WCVP)	No
4673512	Lioponera	Lioponera Mayr, 1879	Animalia	Arthropoda	Insecta	Formicidae		Omnivore					no data	no data	Guillem et al., 2012		No	no data			Confirmed by Dr Ahmed Taheri taheri.ahmed@ucd.ac.ma
2964167	Lupinus albus	Lupinus albus L.	Plantae	Tracheophyta	Magnoliopsida	Fabaceae	Terrestrial		Herb	present	introduced		GloNAF; GRIIS			Yes	Yes	No	15	El Jamaai list; BIEN; GBIF Morocco; WCVP; BIEN-native; GRIIS	Keep: Non-native (Source: WCVP)	No
2963817	Lupinus luteus	Lupinus luteus L.	Plantae	Tracheophyta	Magnoliopsida	Fabaceae	Terrestrial		Herb	present	introduced		GloNAF; GRIIS			Yes	Yes	No	11	El Jamaai list; BIEN; GBIF Morocco; WCVP; BIEN-native; GRIIS	Keep: Non-native (Source: WCVP)	No
3799026	Lycianthes rantonnetii	Lycianthes rantonnetii (CarriÃ¨re ex Lesc.) Bitter	Plantae	Tracheophyta	Magnoliopsida	Solanaceae	Terrestrial		Herb							Yes	No	No	1	iNaturalist; BIEN; GBIF Morocco; BIEN-native; GRIIS		No
3797394	Lycium ferocissimum	Lycium ferocissimum Miers	Plantae	Tracheophyta	Magnoliopsida	Solanaceae	Terrestrial		Herb		introduced		GloNAF	present		Yes	No	No	4	El Jamaai list; BIEN; GBIF Morocco; WCVP; BIEN-native; GRIIS	Keep: Non-native (Source: BIEN and WCVP)	No
5743297	Lyctus africanus	Lyctus africanus Lesne, 1907	Animalia	Arthropoda	Insecta	Bostrichidae	Terrestrial	Herbivore					no data	no access	Menioui (2021)		No	no data			confirmed by Dr YOUSRA BENYAHIA <benyahia.y@ucd.ac.ma>
2288831	Lyrodus pedicellatus	Lyrodus pedicellatus (Quatrefages, 1849)	Animalia	Mollusca	Bivalvia	Teredinidae	Marine	Filter-feeder		present		invasive	no data	no data	El Jamaai et al. (2025)		No	no data			EL JAMAAI, J., TAHERI, A., EL AJJOURI, B., ADLAN MERINI, M. S., & BORGES, L. M. S. (2025). Damage and economic impact of wood-borers (Bivalvia, Teredinidae) on artisanal fishing in Morocco: a case study. MediterraneanMarine Science, 26(1), 120â€“130. https://doi.org/10.12681/mms.39039
9493483	Magallana angulata	Magallana angulata (Lamarck, 1819)	Animalia	Mollusca	Bivalvia	Ostreidae	Marine	Filter-feeder				established	no data		Menioui (2021), Mghili et al. (2024)		No	no data			Alien according to https://www.marinespecies.org/aphia.php?p=taxdetails&id=1039387#distributions consulted 20/03/2025
7820753	Magallana gigas	Magallana gigas (Thunberg, 1793)	Animalia	Mollusca	Bivalvia	Ostreidae	Marine	Filter-feeder			alien	established	no data	introduced	Menioui (2021); Mghili et al. (2024)		No	Yes			present and alien according to https://www.marinespecies.org/aphia.php?p=taxdetails&id=836033#distributions consulted 17/03/25
3152268	Malvastrum coromandelianum	Malvastrum coromandelianum (L.) Garcke	Plantae	Tracheophyta	Magnoliopsida	Malvaceae	Terrestrial		Herb	present	introduced		GloNAF; GRIIS			Yes	Yes	No	42	El Jamaai list; GBIF Morocco; WCVP; GRIIS	Keep: Non-native (Source: WCVP)	No
2965379	Medicago arborea	Medicago arborea L.	Plantae	Tracheophyta	Magnoliopsida	Fabaceae	Terrestrial		Herb	present	introduced		GloNAF; GRIIS			Yes	Yes	No	6	El Jamaai list; BIEN; GBIF Morocco; WCVP; BIEN-native; GRIIS	Keep: Non-native (Source: WCVP)	No
2965354	Medicago falcata	Medicago falcata L.	Plantae	Tracheophyta	Magnoliopsida	Fabaceae	Terrestrial		Herb	present	introduced		GRIIS			Yes	Yes	No	3	El Jamaai list; WCVP; GRIIS	Keep: Non-native (Source: WCVP)	No
2965314	Medicago rotata	Medicago rotata Boiss.	Plantae	Tracheophyta	Magnoliopsida	Fabaceae	Terrestrial		Herb	present	introduced		GRIIS			Yes	Yes	No	1	El Jamaai list; BIEN; GBIF Morocco; WCVP; BIEN-native; GRIIS	Keep: Non-native (Source: WCVP)	No
1370976	Megastigmus pinsapinis	Megastigmus pinsapinis Hoffmeyer, 1931	Animalia	Arthropoda	Insecta	Torymidae	Terrestrial	Unknown					no data	no access	Menioui (2021)		No	no data			confirmed by Dr YOUSRA BENYAHIA <benyahia.y@ucd.ac.ma>
9257451	Melanophila marmottani	Melanophila marmottani Fairmaire, 1868	Animalia	Arthropoda	Insecta	Buprestidae	Terrestrial	Unknown					no data	no data	Menioui (2021)		No	no data			confirmed by Dr YOUSRA BENYAHIA <benyahia.y@ucd.ac.ma>
5914287	Melia azedarach	Melia azedarach L.	Plantae	Tracheophyta	Magnoliopsida	Meliaceae	Terrestrial		Herb							Yes	No	Yes	118	Literature; iNaturalist; BIEN; GBIF Morocco; WCVP; BIEN-native; GRIIS; GISD; GRIIS, GISD ; Added: Buanani, R., et al. "INVENTORY OF ORNAMENTAL PLANTS AT THE CAMPUS OF IBN TOFAIL UNIVERSITY, KENITRA (MOROCCO)." Plant Archives 20.2 (2020): 1108-1113.	Keep: from literature	Yes
2971095	Melilotus albus	Melilotus albus Medik.	Plantae	Tracheophyta	Magnoliopsida	Fabaceae	Terrestrial		Herb	present	introduced		GloNAF; GRIIS			Yes	Yes	No	28	El Jamaai list; BIEN; GBIF Morocco; WCVP; BIEN-native; GRIIS	Keep: Non-native (Source: WCVP)	No
8193111	Melilotus officinalis	Melilotus officinalis (L.) Lam.	Plantae	Tracheophyta	Magnoliopsida	Fabaceae	Terrestrial		Herb	present	introduced		GRIIS			Yes	Yes	No	13	El Jamaai list; BIEN; GBIF Morocco; WCVP; BIEN-native; GRIIS	Keep: Non-native (Source: WCVP)	No
4309804	Merhippolyte ancistrota	Merhippolyte ancistrota Crosnier & Forest, 1973	Animalia	Arthropoda	Malacostraca	Hippolytidae	Marine	Unknown			crypto-expanding	casual	no data	no data	Mghili et al. (2024)		No				Alien according to https://www.marinespecies.org/aphia.php?p=taxdetails&id=107530#distributions consulted 20/03/2025
8185812	Mesembryanthemum cordifolium	Mesembryanthemum cordifolium L.fil.	Plantae	Tracheophyta	Magnoliopsida	Aizoaceae	Terrestrial		Herb	present	introduced		GRIIS			Yes	Yes	No	19	El Jamaai list; BIEN; GBIF Morocco; WCVP; BIEN-native; GRIIS	Keep: Non-native (Source: BIEN and WCVP)	No
5200696	Microcosmus squamiger	Microcosmus squamiger Michaelsen, 1927	Animalia	Chordata	Ascidiacea	Pyuridae	Marine	Unknown		present	Alien	invasive	FirstRecords	introduced	Menioui (2021); Mghili et al. (2024)		No	no data			Alien according to https://www.marinespecies.org/aphia.php?p=taxdetails&id=236666#distributions consulted 20/03/2025
5211250	Micropterus dolomieu	Micropterus dolomieu LacepÃ¨de, 1802	Animalia	Chordata		Centrarchidae	Freshwater	Predator					no data	not present	Menioui (2021)		No	no data			non native according to https://www.iucnredlist.org/species/202564/18230216#geographic-range consulted 22/03/25
2394563	Micropterus salmoides	Micropterus salmoides (LacepÃ¨de, 1802)	Animalia	Chordata		Centrarchidae	Freshwater	Predator		present	introduced		FirstRecords; GRIIS	introduced	Menioui (2021)		Yes	Yes			non native according to https://www.iucnredlist.org/species/61265/58310038#geographic-range consulted 22/03/25
3086240	Mirabilis jalapa	Mirabilis jalapa L.	Plantae	Tracheophyta	Magnoliopsida	Nyctaginaceae	Terrestrial		Herb							Yes	No	No	86	Literature; iNaturalist; BIEN; GBIF Morocco; WCVP; BIEN-native; GRIIS ; Added: LâˆšÂ©ger, J.-F., Chambouleyron, M., Herment, P.-C., Verloove, F., Chatelain, C., Mombrial, F., Andrieu, F., Homrani Bakali, A., & Tanji, A. (2025). Contribution âˆšâ€ la connaissance de la flore du Maroc, notamment de plantes exogâˆšÂ®nes naturalisâˆšÂ©es. Carnets botaniques, 266. https://doi.org/10.34971/A41W-AC40	Keep: Non-native (Source: BIEN and WCVP)	Yes
4373871	Mizuhopecten yessoensis	Mizuhopecten yessoensis (Jay, 1857)	Animalia	Mollusca	Bivalvia	Pectinidae	Marine	Filter-feeder		present	introduced	casual	GRIIS	no data	Menioui (2021); Mghili et al. (2024)		Yes	no data			Alien in Morocco according to https://www.marinespecies.org/aphia.php?p=taxdetails&id=393716#distributions consulted 22/03/25
2501248	Mnemiopsis leidyi	Mnemiopsis leidyi A.Agassiz, 1865	Animalia	Ctenophora	Tentaculata	Bolinopsidae	Marine	Unknown					no data	not present	Menioui (2021)		No	non native			Alien in the Mediterranean according to https://www.marinespecies.org/aphia.php?p=taxdetails&id=106401#distributions consulted 22/03/25
8338793	Modiola caroliniana	Modiola caroliniana (L.) G.Don	Plantae	Tracheophyta	Magnoliopsida	Malvaceae	Terrestrial		Herb	present	introduced		GloNAF; GRIIS			Yes	Yes	No	4	El Jamaai list; GBIF Morocco; WCVP; GRIIS	Keep: Non-native (Source: WCVP)	No
2926881	Moluccella laevis	Moluccella laevis L.	Plantae	Tracheophyta	Magnoliopsida	Lamiaceae	Terrestrial		Herb	present	introduced		GloNAF; GRIIS			Yes	Yes	No	2	El Jamaai list; GBIF Morocco; WCVP; GRIIS	Keep: Non-native (Source: WCVP)	No
1314462	Monomorium monomorium	Monomorium monomorium Bolton, 1987	Animalia	Arthropoda	Insecta	Formicidae	Terrestrial	Omnivore		present	introduced	established	FirstRecords; GRIIS	no data			Yes	no data			Confirmed by Dr Ahmed Taheri taheri.ahmed@ucd.ac.ma
1314773	Monomorium pharaonis	Monomorium pharaonis (Linnaeus, 1758)	Animalia	Arthropoda	Insecta	Formicidae	Terrestrial	Omnivore		present	introduced	established	FirstRecords; GRIIS	not present	Menioui (2021)		Yes	non native			Confirmed by Dr Ahmed Taheri taheri.ahmed@ucd.ac.ma
5361889	Morus alba	Morus alba L.	Plantae	Tracheophyta	Magnoliopsida	Moraceae	Terrestrial		Herb							Yes	No	Yes	42	Literature; BIEN; GBIF Morocco; WCVP; BIEN-native; GRIIS; GISD; GRIIS, GISD ; Added: Buanani, R., et al. "INVENTORY OF ORNAMENTAL PLANTS AT THE CAMPUS OF IBN TOFAIL UNIVERSITY, KENITRA (MOROCCO)." Plant Archives 20.2 (2020): 1108-1113.	Keep: from literature	No
5361888	Morus nigra	Morus nigra L.	Plantae	Tracheophyta	Magnoliopsida	Moraceae	Terrestrial		Herb							Yes	No	No	26	BIEN; GBIF Morocco; WCVP; BIEN-native; GRIIS	Keep: Non-native (Source: BIEN and WCVP)	No
5218987	Mustela nivalis	Mustela nivalis Linnaeus, 1766	Animalia	Chordata	Mammalia	Mustelidae		Unknown			introduced		DAMA				No	non native			present non native according to https://www.iucnredlist.org/species/70207409/147993366#geographic-range consulted 22/03/25
7791733	Mya arenaria	Mya arenaria Linnaeus, 1758	Animalia	Mollusca	Bivalvia	Myidae	Marine	Filter-feeder			cryptogenic	established	no data	no access	Menioui (2021); Mghili et al. (2024)		No	non native			Alien according to https://www.marinespecies.org/aphia.php?p=taxdetails&id=140430#distributions consulted 22/03/25
2362110	Mylopharyngodon piceus	Mylopharyngodon piceus (Richardson, 1846)	Animalia	Chordata		Cyprinidae	Freshwater; Brackish	Omnivore		present	introduced		FirstRecords; GRIIS	introduced			Yes	no data			introduced to Morocco according to https://www.iucnredlist.org/species/166112/156739085#geographic-range consulted 22/03/25
3746220	Myoporum insulare	Myoporum insulare R.Br.	Plantae	Tracheophyta	Magnoliopsida	Scrophulariaceae	Terrestrial		Herb				no data	no access	Sahara and Sahel Observatory (2020)	Yes	No	No	4	El Jamaai list; WCVP; GRIIS	Keep: Non-native (Source: WCVP)	No
3172657	Myoporum laetum	Myoporum laetum G.Forst.	Plantae	Tracheophyta	Magnoliopsida	Scrophulariaceae	Terrestrial		Herb				no data	not present	Sahara and Sahel Observatory (2020)	Yes	No	No	6	El Jamaai list; iNaturalist; BIEN; GBIF Morocco; WCVP; BIEN-native; GRIIS	Keep: Non-native (Source: BIEN and WCVP)	No
7335194	Myoporum tenuifolium	Myoporum tenuifolium G.Forst.	Plantae	Tracheophyta	Magnoliopsida	Scrophulariaceae	Terrestrial		Herb							Yes	No	No	4	El Jamaai list; BIEN; GBIF Morocco; BIEN-native; GRIIS		No
5289833	Nassella tenuissima	Nassella tenuissima (Trin.) Barkworth	Plantae	Tracheophyta	Liliopsida	Poaceae	Terrestrial		Herb							Yes	No	Yes	3	iNaturalist; GRIIS; GISD; GRIIS, GISD		No
2928783	Nicotiana glauca	Nicotiana glauca Graham	Plantae	Tracheophyta	Magnoliopsida	Solanaceae	Terrestrial		Shrub	present	introduced		GloNAF; GRIIS		Menioui (2021); Sahara and Sahel Observatory (2020)	Yes	Yes	Yes	55	El Jamaai list; iNaturalist; BIEN; GBIF Morocco; WCVP; BIEN-native; GRIIS; GISD; GRIIS, GISD	Keep: Non-native (Source: BIEN and WCVP)	Yes
2928775	Nicotiana rustica	Nicotiana rustica L.	Plantae	Tracheophyta	Magnoliopsida	Solanaceae	Terrestrial		Shrub		introduced		GloNAF	no access		Yes	No	No	19	El Jamaai list; GBIF Morocco; WCVP; GRIIS	Keep: Non-native (Source: WCVP)	No
2855486	Nothoscordum borbonicum	Nothoscordum Ã— borbonicum Kunth	Plantae	Tracheophyta	Liliopsida	Amaryllidaceae	Terrestrial		Herb							Yes	Yes	No	5	El Jamaai list; BIEN; GBIF Morocco; BIEN-native; GRIIS		No
8295316	Nylanderia jaegerskioeldi	Nylanderia jaegerskioeldi (Mayr, 1904)	Animalia	Arthropoda	Insecta	Formicidae	Terrestrial	Omnivore		present	introduced		GRIIS				Yes	no data			Confirmed by Dr Ahmed Taheri taheri.ahmed@ucd.ac.ma
3188924	Oenothera biennis	Oenothera biennis L.	Plantae	Tracheophyta	Magnoliopsida	Onagraceae	Terrestrial		Herb		introduced		GloNAF	not present		Yes	No	No	44	El Jamaai list; GBIF Morocco; WCVP; GRIIS	Keep: Non-native (Source: WCVP)	No
7322393	Oenothera indecora	Oenothera indecora Cambess.	Plantae	Tracheophyta	Magnoliopsida	Onagraceae	Terrestrial		Herb		introduced		GloNAF	not present		Yes	No	No	11	El Jamaai list; GBIF Morocco; WCVP; GRIIS	Keep: Non-native (Source: WCVP)	No
3188830	Oenothera stricta	Oenothera stricta Link	Plantae	Tracheophyta	Magnoliopsida	Onagraceae	Terrestrial		Herb		introduced		GloNAF	not present		Yes	No	No	14	El Jamaai list; WCVP; GRIIS	Keep: Non-native (Source: WCVP)	No
5984091	Ommatissus lybicus	Ommatissus lybicus de Bergevin, 1930	Animalia	Arthropoda	Insecta	Tropiduchidae		Unknown					no data	no data	Sahara and Sahel Observatory (2020)		No	no data			Non native according to Shah, Arif & Mohsin, Ataul & Naeem, Muhammad & Nasir, Muhammad & Irfan-ul-Haq, Muhammad & Hafeez, Zahid. (2012). Biology of Dubas Bug, Ommatissus lybicus (Homoptera: Tropiduchidae), a Pest on Date Palm During Spring and Summer Seasons in Panjgur, Pakistan. Pakistan Journal of Zoology. 44. 1603-1611.
5711980	Oncorhynchus clarkii	Oncorhynchus clarkii (Richardson, 1836)	Animalia	Chordata		Salmonidae		Predator		present	vagrant	casual	FirstRecords	no data			No	no data			non native according to https://www.fishbase.org/country/CountryList.php?ID=2688&GenusName=Oncorhynchus&SpeciesName=clarkii consulted 29/03/25
5204019	Oncorhynchus mykiss	Oncorhynchus mykiss (Walbaum, 1792)	Animalia	Chordata		Salmonidae	Freshwater; Brackish; Marine	Predator		present	introduced		FirstRecords; GRIIS	introduced	Menioui (2021)		Yes	Yes			introduced to Morocco according to https://www.fishbase.org/country/CountryList.php?ID=239&GenusName=Oncorhynchus&SpeciesName=mykiss consulted 29/03/25
2972595	Onobrychis viciifolia	Onobrychis viciifolia Scop.	Plantae	Tracheophyta	Magnoliopsida	Fabaceae	Terrestrial		Herb	present	introduced		GloNAF; GRIIS			Yes	Yes	No	18	El Jamaai list; GBIF Morocco; WCVP; GRIIS	Keep: Non-native (Source: WCVP)	No
1373909	Ooencyrtus kuvanae	Ooencyrtus kuvanae (Howard, 1910)	Animalia	Arthropoda	Insecta	Encyrtidae	Terrestrial	Unknown					no data	no access	Menioui (2021)		No	no data			confirmed by Dr YOUSRA BENYAHIA <benyahia.y@ucd.ac.ma>
1385478	Ophelimus maskelli	Ophelimus maskelli (Ashmead, 1900)	Animalia	Arthropoda	Insecta	Eulophidae	Terrestrial	Unknown					no data	present	Menioui (2021)		No	no data			confirmed by Dr YOUSRA BENYAHIA <benyahia.y@ucd.ac.ma>
1857068	Opogona sacchari	Opogona sacchari (Bojer, 1856)	Animalia	Arthropoda	Insecta	Tineidae		Unknown					no data	invasive	Sahara and Sahel Observatory (2020) cited as Opogon asacchari		No	no data			invasive according to https://www.cabidigitallibrary.org/doi/10.1079/cabicompendium.37683 cponsulted 29/03/25
5620016	Opuntia elatior	Opuntia elatior Mill.	Plantae	Tracheophyta	Magnoliopsida	Cactaceae	Terrestrial		Shrub		introduced		GloNAF	not present		Yes	No	No	3	El Jamaai list; GBIF Morocco; WCVP; GRIIS	Keep: Non-native (Source: WCVP)	No
8014872	Opuntia engelmannii	Opuntia engelmannii Salm-Dyck ex Engelm.	Plantae	Tracheophyta	Magnoliopsida	Cactaceae	Terrestrial		Shrub							Yes	No	No	8	iNaturalist; GBIF Morocco; GRIIS		No
5384064	Opuntia ficus-indica	Opuntia ficus-indica (L.) Mill.	Plantae	Tracheophyta	Magnoliopsida	Cactaceae	Terrestrial		Shrub		introduced		GloNAF			Yes	No	Yes	56	El Jamaai list; iNaturalist; BIEN; GBIF Morocco; WCVP; BIEN-native; GRIIS; GISD; GRIIS, GISD	Keep: Non-native (Source: BIEN and WCVP)	Yes
5626003	Opuntia maxima	Opuntia maxima Mill.	Plantae	Tracheophyta	Magnoliopsida	Cactaceae	Terrestrial		Shrub							Yes	No	No	12	BIEN; GBIF Morocco; WCVP; BIEN-native; GRIIS	Keep: Non-native (Source: BIEN and WCVP)	No
7283961	Opuntia microdasys	Opuntia microdasys (Lehm.) Pfeiff.	Plantae	Tracheophyta	Magnoliopsida	Cactaceae	Terrestrial		Shrub							Yes	No	No	9	iNaturalist; GBIF Morocco; GRIIS		No
8171268	Opuntia robusta	Opuntia robusta H.L.Wendl.	Plantae	Tracheophyta	Magnoliopsida	Cactaceae	Terrestrial		Shrub							Yes	No	No	4	iNaturalist; GBIF Morocco; GRIIS		No
5384075	Opuntia stricta	Opuntia stricta (Haw.) Haw.	Plantae	Tracheophyta	Magnoliopsida	Cactaceae	Terrestrial		Shrub				no data	invasive	Sahara and Sahel Observatory (2020)	Yes	No	Yes	36	El Jamaai list; iNaturalist; BIEN; GBIF Morocco; WCVP; BIEN-native; GRIIS; GISD; GRIIS, GISD	Keep: Non-native (Source: BIEN and WCVP)	No
4285694	Oreochromis niloticus	Oreochromis niloticus (Linnaeus, 1758)	Animalia	Chordata		Cichlidae	Freshwater	Unknown					no data	not present	Menioui (2021)		No	non native			non native according to https://www.iucnredlist.org/species/166975/244856058#geographic-range and https://www.fishbase.org/country/CountryList.php?ID=2&GenusName=Oreochromis&SpeciesName=niloticus consulted 29/03/25
2926615	Origanum majorana	Origanum majorana L.	Plantae	Tracheophyta	Magnoliopsida	Lamiaceae	Terrestrial		Herb							Yes	No	No	7	BIEN; GBIF Morocco; WCVP; BIEN-native; GRIIS	Keep: Non-native (Source: BIEN and WCVP)	No
1217391	Orthotomicus longicollis	Orthotomicus longicollis Wood & Bright, 1992	Animalia	Arthropoda	Insecta	Curculionidae	Terrestrial	Herbivore					no data	no access	Menioui (2021)		No	no data			confirmed by Dr YOUSRA BENYAHIA <benyahia.y@ucd.ac.ma>
4995734	Oryctes agamemnon	Oryctes agamemnon Burmeister, 1847	Animalia	Arthropoda	Insecta	Scarabaeidae	Terrestrial	Unknown					no data	no data	Sahara and Sahel Observatory (2020)		No	no data			confirmed by Dr YOUSRA BENYAHIA <benyahia.y@ucd.ac.ma>
3093539	Osteospermum ecklonis	Osteospermum ecklonis (DC.) Norl.	Plantae	Tracheophyta	Magnoliopsida	Asteraceae	Terrestrial		Herb							Yes	No	No	2	Literature; GRIIS ; Added: Buanani, R., et al. "INVENTORY OF ORNAMENTAL PLANTS AT THE CAMPUS OF IBN TOFAIL UNIVERSITY, KENITRA (MOROCCO)." Plant Archives 20.2 (2020): 1108-1113.	Keep: from literature	No
2891664	Oxalis articulata	Oxalis articulata Savigny	Plantae	Tracheophyta	Magnoliopsida	Oxalidaceae	Terrestrial		Herb							Yes	No	No	16	iNaturalist; GBIF Morocco; GRIIS		No
8427624	Oxalis corniculata	Oxalis corniculata L.	Plantae	Tracheophyta	Magnoliopsida	Oxalidaceae	Terrestrial		Herb		introduced		GloNAF			Yes	No	Yes	83	El Jamaai list; iNaturalist; BIEN; GBIF Morocco; WCVP; BIEN-native; GRIIS; GISD; GRIIS, GISD	Keep: Non-native (Source: BIEN and WCVP)	Yes
2891707	Oxalis debilis	Oxalis debilis Kunth	Plantae	Tracheophyta	Magnoliopsida	Oxalidaceae	Terrestrial		Herb		introduced		GloNAF	not present		Yes	No	No	30	El Jamaai list; iNaturalist; GBIF Morocco; WCVP; GRIIS	Keep: Non-native (Source: WCVP)	No
8366816	Oxalis floribunda	Oxalis floribunda Lehm.	Plantae	Tracheophyta	Magnoliopsida	Oxalidaceae	Terrestrial		Herb							Yes	No	No	1	El Jamaai list; GRIIS		No
2891754	Oxalis hirta	Oxalis hirta L.	Plantae	Tracheophyta	Magnoliopsida	Oxalidaceae	Terrestrial		Herb							Yes	No	No	1	El Jamaai list; GRIIS		No
2891755	Oxalis latifolia	Oxalis latifolia Kunth	Plantae	Tracheophyta	Magnoliopsida	Oxalidaceae	Terrestrial		Herb							Yes	No	Yes	37	iNaturalist; GRIIS; GISD; GRIIS, GISD		No
2891661	Oxalis pes-caprae	Oxalis pes-caprae L.	Plantae	Tracheophyta	Magnoliopsida	Oxalidaceae	Terrestrial		Herb	present	introduced		GloNAF; GRIIS		Menioui (2021); Sahara and Sahel Observatory (2020)	Yes	Yes	Yes	34	El Jamaai list; iNaturalist; BIEN; GBIF Morocco; WCVP; BIEN-native; GRIIS; GISD; GRIIS, GISD	Keep: Non-native (Source: BIEN and WCVP)	No
2891764	Oxalis purpurea	Oxalis purpurea L.	Plantae	Tracheophyta	Magnoliopsida	Oxalidaceae	Terrestrial		Herb		introduced		GloNAF	no data		Yes	No	No	12	El Jamaai list; GBIF Morocco; WCVP; GRIIS	Keep: Non-native (Source: WCVP)	No
2498305	Oxyura jamaicensis	Oxyura jamaicensis (J.F.Gmelin, 1789)	Animalia	Chordata	Aves	Anatidae	Freshwater_Terrestrial	Unknown		present	introduced; uncertain	established; reproducing	FirstRecords; GAVIA	abscent			No	Yes			introduced according to https://www.iucnredlist.org/species/22727750/132178041 consulted 29/03/25
2705141	Panicum antidotale	Panicum antidotale Retz.	Plantae	Tracheophyta	Liliopsida	Poaceae	Terrestrial		Herb							Yes	Yes	No	7	El Jamaai list; GBIF Morocco; GRIIS		No
2705162	Panicum capillare	Panicum capillare L.	Plantae	Tracheophyta	Liliopsida	Poaceae	Terrestrial		Herb							Yes	Yes	No	38	El Jamaai list; GRIIS		No
2705090	Panicum miliaceum	Panicum miliaceum L.	Plantae	Tracheophyta	Liliopsida	Poaceae	Terrestrial		Herb	present	introduced		GRIIS			Yes	Yes	No	37	El Jamaai list; BIEN; GBIF Morocco; WCVP; BIEN-native; GRIIS	Keep: Non-native (Source: BIEN and WCVP)	No
2206602	Paracerceis sculpta	Paracerceis sculpta (Holmes, 1904)	Animalia	Arthropoda	Malacostraca	Sphaeromatidae	Marine	Unknown			Alien	established	no data	not present	Mghili et al. (2024)		No				Alien according to https://www.marinespecies.org/aphia.php?p=taxdetails&id=261827#distributions consulted 20/03/25
2237923	Paraleucilla magna	Paraleucilla magna Klautau, Monteiro & Borojevic, 2004	Animalia	Porifera	Calcarea	Amphoriscidae	Marine	Unknown					no data	no data	El Moussaoui et al. (2024)		No				Alien in the Mediterranean according to https://www.marinespecies.org/aphia.php?p=taxdetails&id=362608#distributions consulted 29/03/25
2943719	Paraserianthes lophantha	Paraserianthes lophantha (Willd.) I.C.Nielsen	Plantae	Tracheophyta	Magnoliopsida	Fabaceae	Terrestrial		Herb							Yes	No	No	13	iNaturalist; WCVP; GRIIS	Keep: Non-native (Source: WCVP)	No
1325561	Paratrechina longicornis	Paratrechina longicornis (Latreille, 1802)	Animalia	Arthropoda	Insecta	Formicidae	Terrestrial	Omnivore		present	introduced	established	FirstRecords; GRIIS		Menioui (2021)		Yes	Yes			Confirmed by Dr Ahmed Taheri taheri.ahmed@ucd.ac.ma
5357217	Parkinsonia aculeata	Parkinsonia aculeata L.	Plantae	Tracheophyta	Magnoliopsida	Fabaceae	Terrestrial		Herb							Yes	No	No	66	iNaturalist; BIEN; GBIF Morocco; WCVP; BIEN-native; GRIIS	Keep: Non-native (Source: WCVP)	Yes
2705565	Paspalum dilatatum	Paspalum dilatatum Poir.	Plantae	Tracheophyta	Liliopsida	Poaceae	Terrestrial		Herb	present	introduced		GloNAF; GRIIS			Yes	Yes	No	54	El Jamaai list; GBIF Morocco; WCVP; GRIIS	Keep: Non-native (Source: WCVP)	Yes
2705622	Paspalum distichum	Paspalum distichum L.	Plantae	Tracheophyta	Liliopsida	Poaceae	Terrestrial		Herb	present	introduced		GloNAF; GRIIS			Yes	Yes	No	55	El Jamaai list; BIEN; GBIF Morocco; WCVP; BIEN-native; GRIIS	Keep: Non-native (Source: BIEN and WCVP)	Yes
8100050	Paspalum vaginatum	Paspalum vaginatum Sw.	Plantae	Tracheophyta	Liliopsida	Poaceae	Terrestrial		Herb	present	introduced		GloNAF; GRIIS			Yes	Yes	Yes	27	El Jamaai list; BIEN; GBIF Morocco; WCVP; BIEN-native; GRIIS; GISD; GRIIS, GISD	Keep: Non-native (Source: BIEN and WCVP)	No
7906295	Pelargonium roseum	Pelargonium Ã— roseum (Andrews)	Plantae	Tracheophyta	Magnoliopsida	Geraniaceae	Terrestrial		Herb							Yes	No	No	1	Literature; GRIIS ; Added: Buanani, R., et al. "INVENTORY OF ORNAMENTAL PLANTS AT THE CAMPUS OF IBN TOFAIL UNIVERSITY, KENITRA (MOROCCO)." Plant Archives 20.2 (2020): 1108-1113.	Keep: from literature	No
2223429	Penaeus japonicus	Penaeus japonicus Spence Bate, 1888	Animalia	Arthropoda	Malacostraca	Penaeidae	Marine	Unknown			Alien	established	no data	no data	Menioui (2021); Mghili et al. (2024)		No	no data			Alien in Morocco according to https://www.marinespecies.org/aphia.php?p=taxdetails&id=210371#distributions consulted 29/03/25
2706150	Pennisetum clandestinum	Pennisetum clandestinum Hochst. ex Chiov.	Plantae	Tracheophyta	Liliopsida	Poaceae	Terrestrial		Herb							Yes	No	No	47	El Jamaai list; GBIF Morocco; WCVP; GRIIS		No
2706158	Pennisetum purpureum	Pennisetum purpureum Schumach.	Plantae	Tracheophyta	Liliopsida	Poaceae	Terrestrial		Herb							Yes	Yes	No	70	El Jamaai list; WCVP; GRIIS		Yes
2706154	Pennisetum villosum	Pennisetum villosum Fresen.	Plantae	Tracheophyta	Liliopsida	Poaceae	Terrestrial		Herb							Yes	Yes	No	15	El Jamaai list; GBIF Morocco; WCVP; BIEN-native; GRIIS		No
8140485	Perca fluviatilis	Perca fluviatilis Linnaeus, 1758	Animalia	Chordata		Percidae	Freshwater; Brackish	Unknown		present	introduced	established	FirstRecords; GRIIS	no data	Menioui (2021)		Yes	Yes			introduced according to https://www.iucnredlist.org/species/16580/58297645#geographic-range consulted 29/03/25
2225783	Percnon gibbesi	Percnon gibbesi (H.Milne Edwards, 1853)	Animalia	Arthropoda	Malacostraca	Percnidae	Marine	Unknown					no data	not present	Menioui (2021)		No	no data			present according to https://www.marinespecies.org/aphia.php?p=taxdetails&id=107458#distributions consulted 29/03/25
2928863	Petunia axillaris	Petunia axillaris (Lam.) Britton, Sterns & Poggenb.	Plantae	Tracheophyta	Magnoliopsida	Solanaceae	Terrestrial		Herb							Yes	No	No	5	Literature; GRIIS ; Added: Buanani, R., et al. "INVENTORY OF ORNAMENTAL PLANTS AT THE CAMPUS OF IBN TOFAIL UNIVERSITY, KENITRA (MOROCCO)." Plant Archives 20.2 (2020): 1108-1113.	Keep: from literature	No
2928861	Petunia integrifolia	Petunia integrifolia (Hook.) Schinz & Thell.	Plantae	Tracheophyta	Magnoliopsida	Solanaceae	Terrestrial		Herb							Yes	No	No	5	Literature; GRIIS ; Added: Buanani, R., et al. "INVENTORY OF ORNAMENTAL PLANTS AT THE CAMPUS OF IBN TOFAIL UNIVERSITY, KENITRA (MOROCCO)." Plant Archives 20.2 (2020): 1108-1113.	Keep: from literature	No
4423762	Pezothrips kellyanus	Pezothrips kellyanus (Bagnall, 1916)	Animalia	Arthropoda	Insecta	Thripidae		Unknown					no data	no access	Sahara and Sahel Observatory (2020)		No	no data			non native according to https://doi.org/10.1007/s10530-015-1002-4 and present according to https://gd.eppo.int/taxon/PEZTKE/distribution consulted 20/03/25
9752149	Phasianus colchicus	Phasianus colchicus Linnaeus, 1758	Animalia	Chordata	Aves	Phasianidae	Terrestrial	Unknown		present	introduced; uncertain	established	FirstRecords; GAVIA; GRIIS	introduced			Yes	no data			introduced according to https://www.iucnredlist.org/species/45100023/85926819#geographic-range consulted 29/03/25
1322016	Pheidole indica	Pheidole indica Mayr, 1879	Animalia	Arthropoda	Insecta	Formicidae	Terrestrial	Omnivore		present	introduced	established	FirstRecords; GRIIS	no data			Yes	no data			Confirmed by Dr Ahmed Taheri taheri.ahmed@ucd.ac.ma
1322635	Pheidole megacephala	Pheidole megacephala (Fabricius, 1793)	Animalia	Arthropoda	Insecta	Formicidae	Terrestrial	Omnivore		present	introduced		GRIIS	not present	Menioui (2021)		Yes	non native			introduced from Australia in Eucaliptus sp. Confirmed by Dr Ahmed Taheri taheri.ahmed@ucd.ac.ma
2096180	Phenacoccus madeirensis	Phenacoccus madeirensis Green, 1923	Animalia	Arthropoda	Insecta	Pseudococcidae		Herbivore					no data	not present	Sahara and Sahel Observatory (2020)		No	no data			non native according to https://iraqi-datepalms.net/wp-content/uploads/2021/06/First-record-of-the-Madeira-mealybug-Phenacoccus-madeirensis-Green-Hemiptera-Pseudococcidae-in-Jordan.pdf probably introduced to Morocco from Australia in Eucaliptus sp.
5886131	Phlebotomus kazeruni	Phlebotomus kazeruni Theodor & Mesghali, 1964	Animalia	Arthropoda	Insecta	Psychodidae	Terrestrial	Unknown					no data	no access	Menioui (2021)		No	no data			Confirmed by Dr Kawtar Kettani <kettani.ka@gmail.com>
1241563	Phloeosinus cedri	Phloeosinus cedri C.Brisout, 1883	Animalia	Arthropoda	Insecta	Curculionidae	Terrestrial	Herbivore					no data	no data	Menioui (2021)		No	no data			confirmed by Dr YOUSRA BENYAHIA <benyahia.y@ucd.ac.ma>
7445284	Phoenix canariensis	Phoenix canariensis H.Wildpret	Plantae	Tracheophyta	Liliopsida	Arecaceae	Terrestrial		Herb							Yes	No	Yes	27	El Jamaai list; iNaturalist; GBIF Morocco; GRIIS; GISD; GRIIS, GISD		No
6109699	Phoenix dactylifera	Phoenix dactylifera L.	Plantae	Tracheophyta	Liliopsida	Arecaceae	Terrestrial		Herb							Yes	No	No	33	Literature; BIEN; GBIF Morocco; WCVP; BIEN-native; GRIIS ; Added: Buanani, R., et al. "INVENTORY OF ORNAMENTAL PLANTS AT THE CAMPUS OF IBN TOFAIL UNIVERSITY, KENITRA (MOROCCO)." Plant Archives 20.2 (2020): 1108-1113.	Keep: from literature	No
5293164	Phoenix reclinata	Phoenix reclinata Jacq.	Plantae	Tracheophyta	Liliopsida	Arecaceae	Terrestrial		Herb							Yes	No	No	8	iNaturalist; GBIF Morocco; GRIIS		No
2149937	Pholcus phalangioides	Pholcus phalangioides (Fuesslin, 1775)	Animalia	Arthropoda	Arachnida	Pholcidae		Unknown		present	introduced	established	FirstRecords	no access			No	no data			probably native to the subtropical regions according to https://www.monaconatureencyclopedia.com/pholcus-phalangioides/?lang=en consulted 29/03/25
1114246	Phoracantha recurva	Phoracantha recurva Newman, 1840	Animalia	Arthropoda	Insecta	Cerambycidae	Terrestrial	Herbivore					no data	present	Menioui (2021)		No	no data			confirmed by Dr Sergi TrÃ³coli <sergitrocoli@gmail.com>
1114140	Phoracantha semipunctata	Phoracantha semipunctata (Fabricius, 1775)	Animalia	Arthropoda	Insecta	Cerambycidae	Terrestrial	Herbivore					no data	present	Menioui (2021)		No	no data			confirmed by Dr Sergi TrÃ³coli <sergitrocoli@gmail.com>
4409653	Phoxinus phoxinus	Phoxinus phoxinus (Linnaeus, 1758)	Animalia	Chordata		Cyprinidae	Freshwater	Omnivore		present			FirstRecords		Menioui (2021)		No	non native			non native according to https://www.iucnredlist.org/species/17067/135091520 and https://www.fishbase.org/country/CountryList.php?ID=4661&GenusName=Phoxinus&SpeciesName=phoxinus consulted 29/03/25
5381097	Phyllanthus tenellus	Phyllanthus tenellus Roxb.	Plantae	Tracheophyta	Magnoliopsida	Phyllanthaceae	Terrestrial		Herb							Yes	No	No	24	Literature; GBIF Morocco; GRIIS ; Added: Khamar, H., Benkhnigue, O., Douira, A., Zidane, L., & Touhami, A. O. (2022). Phyllanthus tenellus Roxb.(Phyllanthaceae), a newly naturalising species in Morocco. Check List, 18(2).	Keep: from literature	No
1749580	Phyllocnistis citrella	Phyllocnistis citrella Stainton, 1856	Animalia	Arthropoda	Insecta	Gracillariidae	Terrestrial	Unknown					no data	present	Menioui (2021)		No	no data			non native according to https://edis.ifas.ufl.edu/publication/IN165 and https://cisr.ucr.edu/invasive-species/citrus-leafminer and introduced to Morocco according to https://www.gracillariidae.net/species_by_code/PHYLCITR consulted 29/03/25
2264530	Phyllorhiza punctata	Phyllorhiza punctata von Lendenfeld, 1884	Animalia	Cnidaria	Scyphozoa	Mastigiidae	Marine	Unknown			alien	casual	no data	introduced	Mghili et al. (2024)		No				alien according to https://www.marinespecies.org/aphia.php?p=taxdetails&id=135298#distributions consulted 29/03/25
2264734	Physalia physalis	Physalia physalis (Linnaeus, 1758)	Animalia	Cnidaria	Hydrozoa	Physaliidae	Marine	Unknown					no data	no data	Menioui (2021)		No	no data			introduced to the meditarranean according to https://www.marinespecies.org/aphia.php?p=taxdetails&id=135479#distributions consulted 29/03/25
2928907	Physalis	Physalis L.	Plantae	Tracheophyta	Magnoliopsida	Solanaceae			Herb
8969026	Physalis philadelphica	Physalis philadelphica Lam.	Plantae	Tracheophyta	Magnoliopsida	Solanaceae	Terrestrial		Herb							Yes	No	No	18	BIEN; GBIF Morocco; WCVP; BIEN-native; GRIIS	Keep: Non-native (Source: BIEN and WCVP)	No
5341819	Physalis pubescens	Physalis pubescens L.	Plantae	Tracheophyta	Magnoliopsida	Solanaceae	Terrestrial		Herb							Yes	No	No	12	BIEN; GBIF Morocco; WCVP; BIEN-native; GRIIS	Keep: Non-native (Source: BIEN and WCVP)	No
5189806	Physella acuta	Physella acuta (Draparnaud, 1805)	Animalia	Mollusca	Gastropoda	Physidae	Freshwater	Herbivore					no data	not present	Menioui (2021)		No	non native			introduced according to https://www.iucnredlist.org/species/155538/91354457 and https://www.marinespecies.org/aphia.php?p=taxdetails&id=234093#distributions consulted 29/03/25
3084015	Phytolacca americana	Phytolacca americana L.	Plantae	Tracheophyta	Magnoliopsida	Phytolaccaceae	Terrestrial		Herb							Yes	No	No	37	BIEN; GBIF Morocco; WCVP; BIEN-native; GRIIS	Keep: Non-native (Source: BIEN and WCVP)	No
7309625	Phytolacca dioica	Phytolacca dioica L.	Plantae	Tracheophyta	Magnoliopsida	Phytolaccaceae	Terrestrial		Herb		introduced		GloNAF	no data		Yes	No	No	8	El Jamaai list; iNaturalist; GBIF Morocco; WCVP; GRIIS	Keep: Non-native (Source: WCVP)	No
8080300	Pimpinella anisum	Pimpinella anisum L.	Plantae	Tracheophyta	Magnoliopsida	Apiaceae	Terrestrial		Herb							Yes	No	No	7	BIEN; GBIF Morocco; WCVP; BIEN-native; GRIIS	Keep: Non-native (Source: BIEN and WCVP)	No
5285243	Pinus canariensis	Pinus canariensis C.Sm.	Plantae	Tracheophyta	Pinopsida	Pinaceae	Terrestrial		Tree							Yes	No	No	4	iNaturalist; WCVP; GRIIS	Keep: Non-native (Source: WCVP)	No
5285165	Pinus pinea	Pinus pinea L.	Plantae	Tracheophyta	Pinopsida	Pinaceae	Terrestrial		Tree							Yes	No	No	12	BIEN; GBIF Morocco; WCVP; BIEN-native; GRIIS	Keep: Non-native (Source: BIEN and WCVP)	No
2525471	Pisolithus albus	Pisolithus albus (Cooke & Massee) Priest	Fungi	Basidiomycota	Agaricomycetes	Sclerodermataceae					introduced		MacroFungi	no data			No	no data			Present non native according to DOI: 10.7320/FlMedit25.073
2525474	Pisolithus microcarpus	Pisolithus microcarpus (Cooke & Massee) G.Cunn.	Fungi	Basidiomycota	Agaricomycetes	Sclerodermataceae					introduced		MacroFungi	no data			No	no data			Native to Western Australia according to https://florabase.dbca.wa.gov.au/browse/profile/48975
3190585	Pistacia vera	Pistacia vera L.	Plantae	Tracheophyta	Magnoliopsida	Anacardiaceae	Terrestrial		Herb							Yes	No	No	4	BIEN; GBIF Morocco; WCVP; BIEN-native; GRIIS	Keep: Non-native (Source: BIEN and WCVP)	No
2870583	Pistia stratiotes	Pistia stratiotes L.	Plantae	Tracheophyta	Liliopsida	Araceae	Terrestrial		Herb							Yes	No	Yes	88	El Jamaai list; iNaturalist; GBIF Morocco; GRIIS; GISD; GRIIS, GISD		Yes
8677924	Pittosporum tobira	Pittosporum tobira (Murray) Aiton fil.	Plantae	Tracheophyta	Magnoliopsida	Pittosporaceae	Terrestrial		Herb							Yes	No	No	12	El Jamaai list; iNaturalist; BIEN; GBIF Morocco; BIEN-native; GRIIS		No
2986239	Pittosporum undulatum	Pittosporum undulatum Vent.	Plantae	Tracheophyta	Magnoliopsida	Pittosporaceae	Terrestrial		Herb							Yes	No	Yes	20	BIEN; GBIF Morocco; WCVP; BIEN-native; GRIIS; GISD; GRIIS, GISD	Keep: Non-native (Source: BIEN and WCVP)	No
4497291	Plagiotrochus amenti	Plagiotrochus amenti Kieffer, 1901	Animalia	Arthropoda	Insecta	Cynipidae		Unknown					no data	no data	Sahara and Sahel Observatory (2020)		No	no data			confirmed by Dr YOUSRA BENYAHIA <benyahia.y@ucd.ac.ma>
7984698	Planococcus ficus	Planococcus ficus (Signoret, 1875)	Animalia	Arthropoda	Insecta	Pseudococcidae		Herbivore					no data	no access	Sahara and Sahel Observatory (2020)		No	no data			Present in North Africa, probable origin Israel according to https://doi.org/10.1146/annurev-ento-010715-023547
7400250	Platanus hispanica	Platanus Ã— hispanica Mill. ex MÃ¼nchh.	Plantae	Tracheophyta	Magnoliopsida	Platanaceae	Terrestrial		Herb							Yes	No	No	7	iNaturalist; GBIF Morocco; GRIIS		No
2684855	Platycladus orientalis	Platycladus orientalis (L.) Franco	Plantae	Tracheophyta	Pinopsida	Cupressaceae	Terrestrial		Tree							Yes	No	No	13	Literature; GRIIS ; Added: Buanani, R., et al. "INVENTORY OF ORNAMENTAL PLANTS AT THE CAMPUS OF IBN TOFAIL UNIVERSITY, KENITRA (MOROCCO)." Plant Archives 20.2 (2020): 1108-1113.	Keep: from literature	No
3902891	Plectranthus neochilus	Plectranthus neochilus Schltr.	Plantae	Tracheophyta	Magnoliopsida	Lamiaceae	Terrestrial		Herb							Yes	No	No	1	Literature; GRIIS ; Added: Buanani, R., et al. "INVENTORY OF ORNAMENTAL PLANTS AT THE CAMPUS OF IBN TOFAIL UNIVERSITY, KENITRA (MOROCCO)." Plant Archives 20.2 (2020): 1108-1113.	Keep: from literature	No
3082283	Plumbago auriculata	Plumbago auriculata Lam.	Plantae	Tracheophyta	Magnoliopsida	Plumbaginaceae	Terrestrial		Herb							Yes	No	No	21	Literature; iNaturalist; BIEN; GBIF Morocco; BIEN-native; GRIIS ; Added: Buanani, R., et al. "INVENTORY OF ORNAMENTAL PLANTS AT THE CAMPUS OF IBN TOFAIL UNIVERSITY, KENITRA (MOROCCO)." Plant Archives 20.2 (2020): 1108-1113.	Keep: from literature	No
2704178	Poa pratensis	Poa pratensis L.	Plantae	Tracheophyta	Liliopsida	Poaceae	Terrestrial		Herb							Yes	No	Yes	16	BIEN; GBIF Morocco; WCVP; BIEN-native; GRIIS; GISD; GRIIS, GISD	Keep: Non-native (Source: BIEN and WCVP)	No
2350050	Poecilia reticulata	Poecilia reticulata Peters, 1859	Animalia	Chordata		Poeciliidae	Freshwater	Unknown					no data	not present			No	Yes			introduced according to https://www.iucnredlist.org/species/60444/3100119
2332062	Polyandrocarpa zorritensis	Polyandrocarpa zorritensis (Van Name, 1931)	Animalia	Chordata	Ascidiacea	Styelidae	Marine	Unknown			alien	casual	no data	not present	Mghili et al. (2024)		No				Alien according to https://www.marinespecies.org/aphia.php?p=taxdetails&id=103895#distributions
2291759	Polycera hedgpethi	Polycera hedgpethi Er.Marcus, 1964	Animalia	Mollusca	Gastropoda	Polyceridae	Marine	Herbivore			Alien	established	no data	no data	Mghili et al. (2024)		No				Alien according to https://www.marinespecies.org/aphia.php?p=taxdetails&id=140835#distributions
2291791	Polycerella emertoni	Polycerella emertoni A.E.Verrill, 1880	Animalia	Mollusca	Gastropoda	Polyceridae	Marine	Herbivore		present	introduced	established	GRIIS	not present	Mghili et al. (2024)		Yes	no data			Alien according to https://www.marinespecies.org/aphia.php?p=taxdetails&id=140839#distributions
2131854	Polyphagotarsonemus latus	Polyphagotarsonemus latus (Banks, 1904)	Animalia	Arthropoda	Arachnida	Tarsonemidae		Unknown					no data	present	Sahara and Sahel Observatory (2020)		No	no data			present according to https://www1.montpellier.inrae.fr/CBGP/spmweb/pdf/Authors_S/Saba_1973b.pdf
2394534	Pomoxis annularis	Pomoxis annularis Rafinesque, 1818	Animalia	Chordata		Centrarchidae	Terrestrial	Predator		present	vagrant	casual	FirstRecords	Formerly present			No	no data			non native according to https://www.iucnredlist.org/species/202602/18232424#geographic-range
2394526	Pomoxis nigromaculatus	Pomoxis nigromaculatus (Lesueur, 1829)	Animalia	Chordata		Centrarchidae	Terrestrial	Predator		present	vagrant	casual	FirstRecords	Formerly present			No	no data			non native according to https://www.iucnredlist.org/species/202603/18236602
3084777	Portulacaria afra	Portulacaria afra Jacq.	Plantae	Tracheophyta	Magnoliopsida	Didiereaceae	Terrestrial		Herb							Yes	No	No	1	BIEN; GBIF Morocco; BIEN-native; GRIIS	Keep: Non-native (Source: POW)	No
2227300	Procambarus clarkii	Procambarus clarkii (Girard, 1852)	Animalia	Arthropoda	Malacostraca	Cambaridae	Freshwater; Brackish	Omnivore		present	introduced		GRIIS	not present			Yes	non native			non native https://www.iucnredlist.org/species/153877/4557336
5358460	Prosopis juliflora	Prosopis juliflora (Sw.) DC.	Plantae	Tracheophyta	Magnoliopsida	Fabaceae	Terrestrial		Tree							Yes	No	Yes	69	El Jamaai list; BIEN; GBIF Morocco; BIEN-native; GRIIS; GISD; GRIIS, GISD		Yes
7818643	Prunus armeniaca	Prunus armeniaca L.	Plantae	Tracheophyta	Magnoliopsida	Rosaceae	Terrestrial		Herb							Yes	No	No	14	BIEN; GBIF Morocco; WCVP; BIEN-native; GRIIS	Keep: Non-native (Source: BIEN and WCVP)	No
7917188	Psammodromus hispanicus	Psammodromus hispanicus Fitzinger, 1826	Animalia	Chordata	Squamata	Lacertidae		Unknown					AmphRep	no data			No	no data			non native according to https://www.iucnredlist.org/species/19072970/19072994
2362868	Pseudorasbora parva	Pseudorasbora parva (Temminck & Schlegel, 1846)	Animalia	Chordata		Cyprinidae	Freshwater	Omnivore		present	introduced		GRIIS	not present			Yes	no data			non native https://www.iucnredlist.org/species/166136/156742842
5420901	Punica granatum	Punica granatum L.	Plantae	Tracheophyta	Magnoliopsida	Lythraceae	Terrestrial		Herb	present	introduced		GloNAF; GRIIS			Yes	Yes	No	30	El Jamaai list; BIEN; GBIF Morocco; WCVP; BIEN-native; GRIIS	Keep: Non-native (Source: BIEN and WCVP)	No
3172569	Pyrostegia venusta	Pyrostegia venusta (Ker Gawl.) Miers	Plantae	Tracheophyta	Magnoliopsida	Bignoniaceae	Terrestrial		Herb							Yes	No	No	8	iNaturalist; GBIF Morocco; GRIIS		No
2439261	Rattus norvegicus	Rattus norvegicus (Berkenhout, 1769)	Animalia	Chordata	Mammalia	Muridae	Terrestrial	Unknown		present	introduced	established	FirstRecords	introduced			No	non native			non native https://www.iucnredlist.org/species/19353/165118026
2593135	Reddellomyces donkii	Reddellomyces donkii (MalenÃ§on) Trappe, Castellano & Malajczuk	Fungi	Ascomycota	Pezizomycetes	Tuberaceae					introduced		MacroFungi	no data			No	no data			native to Australia http://www.micobotanicajaen.com/Revista/Articulos/MARibesR/Fuerteventura001/Reddellomyces%20donkii%20140310%20112.pdf
3040255	Reseda odorata	Reseda odorata L.	Plantae	Tracheophyta	Magnoliopsida	Resedaceae	Terrestrial		Herb							Yes	No	No	8	BIEN; GBIF Morocco; WCVP; BIEN-native; GRIIS	Keep: Non-native (Source: BIEN and WCVP)	No
4513999	Reticulitermes grassei	Reticulitermes grassei ClÃ©ment, 1977	Animalia	Arthropoda	Insecta	Rhinotermitidae		Unknown					no data		HernÃ¡ndez-Teixidor et al., 2024		No
6132234	Rhynchophorus ferrugineus	Rhynchophorus ferrugineus (A.G.Olivier, 1791)	Animalia	Arthropoda	Insecta	Dryophthoridae	Terrestrial	Unknown		present	introduced		GRIIS		Menioui (2021); Sahara and Sahel Observatory (2020)		Yes	no data			confirmed by Dr YOUSRA BENYAHIA <benyahia.y@ucd.ac.ma>
5380041	Ricinus communis	Ricinus communis L.	Plantae	Tracheophyta	Magnoliopsida	Euphorbiaceae	Terrestrial		Shrub	present	introduced		GloNAF; GRIIS		Menioui (2021); Sahara and Sahel Observatory (2020)	Yes	Yes	Yes	143	El Jamaai list; BIEN; GBIF Morocco; WCVP; BIEN-native; GRIIS; GISD; GRIIS, GISD	Keep: Non-native (Source: BIEN and WCVP)	Yes
5352251	Robinia pseudoacacia	Robinia pseudoacacia L.	Plantae	Tracheophyta	Magnoliopsida	Fabaceae	Terrestrial		Tree	present	introduced		GloNAF; GRIIS			Yes	Yes	Yes	59	El Jamaai list; iNaturalist; BIEN; GBIF Morocco; WCVP; BIEN-native; GRIIS; GISD; GRIIS, GISD	Keep: Non-native (Source: BIEN and WCVP)	Yes
2892272	Rubia tinctorum	Rubia tinctorum L.	Plantae	Tracheophyta	Magnoliopsida	Rubiaceae	Terrestrial		Herb		introduced		GloNAF	no access		Yes	No	No	16	El Jamaai list; BIEN; GBIF Morocco; WCVP; BIEN-native; GRIIS	Keep: Non-native (Source: BIEN and WCVP)	No
5824863	Rugulopteryx okamurae	Rugulopteryx okamurae (E.Y.Dawson) I.K.Hwang, W.J.Lee & H.S.Kim, 2009	Chromista	Ochrophyta	Phaeophyceae	Dictyotaceae	Marine			present	introduced	invasive	GRIIS	no data	Menioui (2021); Mghili et al. (2024)		Yes	no data			Alien according to https://www.marinespecies.org/aphia.php?p=taxdetails&id=495597#distributions
2889011	Rumex obtusifolius	Rumex obtusifolius L.	Plantae	Tracheophyta	Magnoliopsida	Polygonaceae	Terrestrial		Herb							Yes	No	Yes	23	BIEN; GBIF Morocco; WCVP; BIEN-native; GRIIS; GISD; GRIIS, GISD	Keep: Non-native (Source: BIEN and WCVP)	No
3190382	Ruta graveolens	Ruta graveolens L.	Plantae	Tracheophyta	Magnoliopsida	Rutaceae	Terrestrial		Herb							Yes	No	No	11	El Jamaai list; BIEN; GBIF Morocco; BIEN-native; GRIIS		No
2359706	Rutilus rutilus	Rutilus rutilus (Linnaeus, 1758)	Animalia	Chordata		Cyprinidae	Freshwater; Brackish	Omnivore		present	introduced		FirstRecords; GRIIS	introduced	Menioui (2021)		Yes	Yes			introduced according to https://www.iucnredlist.org/species/19787/58301083
4377197	Saccharina japonica	Saccharina japonica (Aresch.) C.E.Lane, C.Mayes, Druehl & G.W.Saunders, 2006	Chromista	Ochrophyta	Phaeophyceae	Laminariaceae	Marine						no data	not present	Menioui (2021)		No	no data			alien according to https://www.marinespecies.org/aphia.php?p=taxdetails&id=377084#distributions
5372639	Salix babylonica	Salix babylonica L.	Plantae	Tracheophyta	Magnoliopsida	Salicaceae	Terrestrial		Herb							Yes	No	Yes	23	Literature; GBIF Morocco; GRIIS; GISD; GRIIS, GISD ; Added: Khabbach, Abdelmajid, Mohamed Libiad, and Abdeslam Ennabili. "An updated checklist of the wetland vascular flora from Morocco." Moroccan Journal of Biology 17 (2020): 1-35	Keep: from literature	No
2928796	Salpichroa origanifolia	Salpichroa origanifolia (Lam.) Baill.	Plantae	Tracheophyta	Magnoliopsida	Solanaceae	Terrestrial		Herb	present	introduced		GloNAF; GRIIS		Menioui (2021); Sahara and Sahel Observatory (2020)	Yes	Yes	No	13	El Jamaai list; BIEN; GBIF Morocco; WCVP; BIEN-native; GRIIS	Keep: Non-native (Source: WCVP)	No
4284021	Salvelinus alpinus	Salvelinus alpinus (Linnaeus, 1758)	Animalia	Chordata		Salmonidae		Predator		present	vagrant	casual	FirstRecords	no access			No	no data			non native according to https://www.iucnredlist.org/species/242222668/242224493
2351271	Salvelinus fontinalis	Salvelinus fontinalis (Mitchill, 1814)	Animalia	Chordata		Salmonidae	Terrestrial	Predator		present	vagrant	casual	FirstRecords	introduced			No	Yes			non native according to https://www.iucnredlist.org/species/61278/18229011
2351327	Salvelinus namaycush	Salvelinus namaycush (Walbaum, 1792)	Animalia	Chordata		Salmonidae	Terrestrial	Predator		present	vagrant	casual	FirstRecords				No	Yes			non native according to https://www.iucnredlist.org/species/13151187/18230195
6412283	Salvia fruticosa	Salvia fruticosa Mill.	Plantae	Tracheophyta	Magnoliopsida	Lamiaceae	Terrestrial		Herb		introduced		GloNAF	not present		Yes	No	No	1	El Jamaai list; iNaturalist; GBIF Morocco; WCVP; GRIIS	Keep: Non-native (Source: WCVP)	No
2927004	Salvia officinalis	Salvia officinalis L.	Plantae	Tracheophyta	Magnoliopsida	Lamiaceae	Terrestrial		Herb		introduced		GloNAF	no access		Yes	No	No	7	El Jamaai list; BIEN; GBIF Morocco; WCVP; BIEN-native; GRIIS	Keep: Non-native (Source: BIEN and WCVP)	No
2888728	Sambucus nigra	Sambucus nigra L.	Plantae	Tracheophyta	Magnoliopsida	Viburnaceae	Terrestrial		Herb	present	introduced		GRIIS			Yes	Yes	No	37	El Jamaai list; iNaturalist; BIEN; GBIF Morocco; WCVP; BIEN-native; GRIIS	Keep: Non-native (Source: BIEN and WCVP)	No
2382155	Sander lucioperca	Sander lucioperca (Linnaeus, 1758)	Animalia	Chordata		Percidae	Freshwater	Unknown		present	introduced	established	FirstRecords; GRIIS	introduced	Menioui (2021)		Yes	no data			introduced according to https://www.iucnredlist.org/species/20860/58302439
3085360	Saponaria officinalis	Saponaria officinalis L.	Plantae	Tracheophyta	Magnoliopsida	Caryophyllaceae	Terrestrial		Herb							Yes	No	No	17	BIEN; GBIF Morocco; WCVP; BIEN-native; GRIIS	Keep: Non-native (Source: BIEN and WCVP)	No
3197314	Sargassum muticum	Sargassum muticum (Yendo) Fensholt	Chromista	Ochrophyta	Phaeophyceae	Sargassaceae	Marine			present	introduced	invasive	GRIIS	not present	Menioui (2021); Mghili et al. (2024)		Yes	non native			alien according to https://www.marinespecies.org/aphia.php?p=taxdetails&id=494791#distributions
2362635	Scardinius erythrophthalmus	Scardinius erythrophthalmus (Linnaeus, 1758)	Animalia	Chordata		Cyprinidae	Freshwater; Brackish	Omnivore		present	introduced	established	FirstRecords; GRIIS	introduced	Menioui (2021)		Yes	Yes			non native according to https://www.iucnredlist.org/species/19946/58302044
3038546	Schefflera actinophylla	Schefflera actinophylla (Endl.) Harms	Plantae	Tracheophyta	Magnoliopsida	Araliaceae	Terrestrial		Herb							Yes	No	Yes	26	Literature; GRIIS; GISD; GRIIS, GISD ; Added: Buanani, R., et al. "INVENTORY OF ORNAMENTAL PLANTS AT THE CAMPUS OF IBN TOFAIL UNIVERSITY, KENITRA (MOROCCO)." Plant Archives 20.2 (2020): 1108-1113.	Keep: from literature	No
8322892	Schefflera arboricola	Schefflera arboricola Hayata, 1916	Plantae	Tracheophyta	Magnoliopsida	Araliaceae	Terrestrial		Herb							Yes	No	No	10	Literature; GRIIS ; Added: Buanani, R., et al. "INVENTORY OF ORNAMENTAL PLANTS AT THE CAMPUS OF IBN TOFAIL UNIVERSITY, KENITRA (MOROCCO)." Plant Archives 20.2 (2020): 1108-1113.	Keep: from literature	No
3190642	Schinus molle	Schinus molle L.	Plantae	Tracheophyta	Magnoliopsida	Anacardiaceae	Terrestrial		Herb		introduced		GloNAF	present		Yes	No	No	26	El Jamaai list; iNaturalist; BIEN; GBIF Morocco; WCVP; BIEN-native; GRIIS	Keep: Non-native (Source: BIEN and WCVP)	No
3660419	Schinus terebinthifolia	Schinus terebinthifolia Raddi	Plantae	Tracheophyta	Magnoliopsida	Anacardiaceae	Terrestrial		Herb							Yes	No	No	36	iNaturalist; GBIF Morocco; WCVP; GRIIS	Keep: Non-native (Source: WCVP)	No
5239945	Scleroderma albidum	Scleroderma albidum Pat. & Trab.	Fungi	Basidiomycota	Agaricomycetes	Sclerodermataceae					introduced		MacroFungi	no data			No	no data			native to Australia https://apps.des.qld.gov.au/species-search/details/?id=29097
5239977	Scleroderma bovista	Scleroderma bovista Fr.	Fungi	Basidiomycota	Agaricomycetes	Sclerodermataceae					introduced		MacroFungi	no data			No	no data			native to Australia https://apps.des.qld.gov.au/species-search/details/?id=29009
4427549	Scobicia chevrieri	Scobicia chevrieri (Villa & Villa, 1835)	Animalia	Arthropoda	Insecta	Bostrichidae	Terrestrial	Herbivore					no data	no data	Menioui (2021)		No	no data			confirmed by Dr YOUSRA BENYAHIA <benyahia.y@ucd.ac.ma>
1189353	Scolytus amygdali	Scolytus amygdali GuÃ©rin-MÃ©neville, 1847	Animalia	Arthropoda	Insecta	Curculionidae	Terrestrial	Herbivore					no data	no access	Sahara and Sahel Observatory (2020)		No	no data			confirmed by Dr YOUSRA BENYAHIA <benyahia.y@ucd.ac.ma>
1242020	Scythropus warioni	Scythropus warioni Mars., 1876	Animalia	Arthropoda	Insecta	Curculionidae	Terrestrial	Herbivore					no data	no data	Menioui (2021)		No	no data			confirmed by Dr YOUSRA BENYAHIA <benyahia.y@ucd.ac.ma>
8222212	Semanotus algiricus	Semanotus algiricus Pic, 1905	Animalia	Arthropoda	Insecta	Cerambycidae	Terrestrial	Herbivore					no data	no data	Menioui (2021)		No	no data			Keep: Non-native (Source: WCVP)
4933568	Senecio angulatus	Senecio angulatus L.fil.	Plantae	Tracheophyta	Magnoliopsida	Asteraceae	Terrestrial		Herb							Yes	No	Yes	13	iNaturalist; GBIF Morocco; GRIIS; GISD; GRIIS, GISD		No
3108861	Senecio santiagoensis	Senecio santiagoensis Kuntze	Plantae	Tracheophyta	Magnoliopsida	Asteraceae	Terrestrial		Herb							Yes	No	No	1	BIEN; GBIF Morocco; BIEN-native; GRIIS	Keep: Non-native (Source: POW)	No
2958076	Senna bicapsularis	Senna bicapsularis (L.) Roxb.	Plantae	Tracheophyta	Magnoliopsida	Fabaceae	Terrestrial		Herb		introduced		GloNAF	not present		Yes	No	No	18	El Jamaai list; GBIF Morocco; WCVP; GRIIS	Keep: Non-native (Source: WCVP)	No
2957656	Senna multiglandulosa	Senna multiglandulosa (Jacq.) H.S.Irwin & Barneby	Plantae	Tracheophyta	Magnoliopsida	Fabaceae	Terrestrial		Herb		introduced		GloNAF	no access		Yes	No	No	3	El Jamaai list; WCVP; GRIIS	Keep: Non-native (Source: WCVP)	No
2702958	Setaria palmifolia	Setaria palmifolia (J.Koenig) Stapf	Plantae	Tracheophyta	Liliopsida	Poaceae	Terrestrial		Herb							Yes	No	No	17	Literature; GRIIS ; Added: LâˆšÂ©ger, J.-F., Chambouleyron, M., Herment, P.-C., Verloove, F., Chatelain, C., Mombrial, F., Andrieu, F., Homrani Bakali, A., & Tanji, A. (2025). Contribution âˆšâ€ la connaissance de la flore du Maroc, notamment de plantes exogâˆšÂ®nes naturalisâˆšÂ©es. Carnets botaniques, 266. https://doi.org/10.34971/A41W-AC46		No
2526798	Setchelliogaster tenuipes	Setchelliogaster tenuipes (Setch.) Pouzar	Fungi	Basidiomycota	Agaricomycetes	Bolbitiaceae							MacroFungi	no data			No	no data			introduced from Australasia https://www.mycosphere.org/pdf/Mycosphere_8_7_6.pdf
6005787	Sinoxylon muricatum	Sinoxylon muricatum (Linnaeus, 1767)	Animalia	Arthropoda	Insecta	Bostrichidae	Terrestrial	Herbivore					no data	no data	Menioui (2021)		No	no data			confirmed by Dr YOUSRA BENYAHIA <benyahia.y@ucd.ac.ma>
4427572	Sinoxylon perforans	Sinoxylon perforans (Schrank, 1789)	Animalia	Arthropoda	Insecta	Bostrichidae	Terrestrial	Herbivore					no data	no access	Menioui (2021)		No	no data			confirmed by Dr YOUSRA BENYAHIA <benyahia.y@ucd.ac.ma>
6005761	Sinoxylon succisum	Sinoxylon succisum Lesne, 1895	Animalia	Arthropoda	Insecta	Bostrichidae	Terrestrial	Herbivore					no data	no data	Menioui (2021)		No	no data			confirmed by Dr YOUSRA BENYAHIA <benyahia.y@ucd.ac.ma>
4492199	Sirex noctilio	Sirex noctilio Fabricius, 1773	Animalia	Arthropoda	Insecta	Siricidae		Unknown					no data	present	Sahara and Sahel Observatory (2020)		No	non native			confirmed by Dr YOUSRA BENYAHIA <benyahia.y@ucd.ac.ma>
5581538	Solandra maxima	Solandra maxima (Moc. & SessÃ©) P.S.Green	Plantae	Tracheophyta	Magnoliopsida	Solanaceae	Terrestrial		Herb							Yes	No	No	8	iNaturalist; GBIF Morocco; GRIIS		No
2931646	Solanum abutiloides	Solanum abutiloides (Griseb.) Bitter & Lillo	Plantae	Tracheophyta	Magnoliopsida	Solanaceae	Terrestrial		Shrub							Yes	No	No	3	Literature; GRIIS ; Added: Khamar, Hamid, Youssef Dallahi, and Abdelmonaim Homrani Bakali. "New records of three alien Solanumspecies in Morocco." Check List 20.2 (2024): 544.	Keep: from literature	No
2930222	Solanum americanum	Solanum americanum Mill.	Plantae	Tracheophyta	Magnoliopsida	Solanaceae	Terrestrial		Shrub							Yes	No	No	41	El Jamaai list; GBIF Morocco; GRIIS		No
2929800	Solanum angustifolium	Solanum angustifolium Houst. ex Mill.	Plantae	Tracheophyta	Magnoliopsida	Solanaceae	Terrestrial		Shrub							Yes	No	No	15	El Jamaai list; GRIIS		No
2929628	Solanum bonariense	Solanum bonariense L.	Plantae	Tracheophyta	Magnoliopsida	Solanaceae	Terrestrial		Shrub							Yes	No	No	4	Literature; iNaturalist; GBIF Morocco; GRIIS ; Added: Khamar, Hamid, Youssef Dallahi, and Abdelmonaim Homrani Bakali. "New records of three alien Solanumspecies in Morocco." Check List 20.2 (2024): 544.	Keep: from literature	No
2929892	Solanum elaeagnifolium	Solanum elaeagnifolium Cav.	Plantae	Tracheophyta	Magnoliopsida	Solanaceae	Terrestrial		Shrub	present	introduced		GloNAF; GRIIS		Menioui (2021); Sahara and Sahel Observatory (2020)	Yes	Yes	No	36	El Jamaai list; iNaturalist; BIEN; GBIF Morocco; WCVP; BIEN-native; GRIIS	Keep: Non-native (Source: BIEN and WCVP)	No
2930439	Solanum laciniatum	Solanum laciniatum Aiton	Plantae	Tracheophyta	Magnoliopsida	Solanaceae	Terrestrial		Shrub							Yes	No	No	5	BIEN; GBIF Morocco; WCVP; BIEN-native; GRIIS	Keep: Non-native (Source: BIEN and WCVP)	No
2931714	Solanum laxum	Solanum laxum Spreng.	Plantae	Tracheophyta	Magnoliopsida	Solanaceae	Terrestrial		Shrub							Yes	No	No	7	iNaturalist; GRIIS		No
2929062	Solanum linnaeanum	Solanum linnaeanum Hepper & P.-M.L.Jaeger	Plantae	Tracheophyta	Magnoliopsida	Solanaceae	Terrestrial		Shrub							Yes	No	No	9	El Jamaai list; iNaturalist; BIEN; GBIF Morocco; WCVP; BIEN-native; GRIIS		No
7538163	Solanum marginatum	Solanum marginatum L.fil.	Plantae	Tracheophyta	Magnoliopsida	Solanaceae	Terrestrial		Shrub		introduced		GloNAF	no access		Yes	No	No	9	El Jamaai list; WCVP; GRIIS	Keep: Non-native (Source: WCVP)	No
2930617	Solanum melongena	Solanum melongena L.	Plantae	Tracheophyta	Magnoliopsida	Solanaceae	Terrestrial		Shrub							Yes	No	No	26	iNaturalist; BIEN; GBIF Morocco; BIEN-native; GRIIS		No
2930922	Solanum rostratum	Solanum rostratum Dunal	Plantae	Tracheophyta	Magnoliopsida	Solanaceae	Terrestrial		Shrub							Yes	No	No	16	iNaturalist; GBIF Morocco; WCVP; GRIIS	Keep: Non-native (Source: WCVP)	No
2932184	Solanum sisymbriifolium	Solanum sisymbriifolium Lam.	Plantae	Tracheophyta	Magnoliopsida	Solanaceae	Terrestrial		Shrub							Yes	No	Yes	23	iNaturalist; GBIF Morocco; WCVP; GRIIS; GISD; GRIIS, GISD	Keep: Non-native (Source: WCVP)	No
2931237	Solanum triflorum	Solanum triflorum Nutt.	Plantae	Tracheophyta	Magnoliopsida	Solanaceae	Terrestrial		Shrub							Yes	No	No	12	BIEN; GBIF Morocco; WCVP; BIEN-native; GRIIS	Keep: Non-native (Source: BIEN and WCVP)	No
7954775	Soliva stolonifera	Soliva stolonifera (Brot.) Loudon	Plantae	Tracheophyta	Magnoliopsida	Asteraceae	Terrestrial		Herb	present	introduced		GloNAF; GRIIS			Yes	Yes	No	8	El Jamaai list; BIEN; GBIF Morocco; WCVP; BIEN-native; GRIIS	Keep: Non-native (Source: BIEN and WCVP)	No
4105502	Sorghum virgatum	Sorghum virgatum (Hack.) Stapf	Plantae	Tracheophyta	Liliopsida	Poaceae	Terrestrial		Herb	present	introduced		GRIIS			Yes	Yes	No	2	El Jamaai list; WCVP; GRIIS	Keep: Non-native (Source: WCVP)	No
5290041	Spartina densiflora	Spartina densiflora Brongn.	Plantae	Tracheophyta	Liliopsida	Poaceae	Terrestrial		Herb							Yes	Yes	Yes	3	El Jamaai list; GBIF Morocco; GRIIS; GISD; GRIIS, GISD		No
5176589	Sphaeroma walkeri	Sphaeroma walkeri Stebbing, 1905	Animalia	Arthropoda	Malacostraca	Sphaeromatidae	Marine	Unknown			Alien	casual	no data	not present	Mghili et al. (2024)		No	no data			Alien according to https://www.marinespecies.org/aphia.php?p=taxdetails&id=220727#distributions
3083647	Spinacia oleracea	Spinacia oleracea L.	Plantae	Tracheophyta	Magnoliopsida	Amaranthaceae	Terrestrial		Herb							Yes	No	No	16	BIEN; GBIF Morocco; WCVP; BIEN-native; GRIIS	Keep: Non-native (Source: BIEN and WCVP)	No
5109931	Spodoptera littoralis	Spodoptera littoralis (Boisduval, 1833)	Animalia	Arthropoda	Insecta	Noctuidae		Unknown					no data	present	Sahara and Sahel Observatory (2020)		No	no data			Its native range is considered to beÂ sub-Saharan AfricaÂ according to https://gd.eppo.int/taxon/SPODLI/datasheet#:~:text=2020%2D12%2D03-,S.,including%20countries%20in%20Southern%20Europe.
2704757	Sporobolus indicus	Sporobolus indicus (L.) R.Br.	Plantae	Tracheophyta	Liliopsida	Poaceae	Terrestrial		Herb	present	introduced		GRIIS			Yes	Yes	No	31	El Jamaai list; BIEN; GBIF Morocco; WCVP; BIEN-native; GRIIS	Keep: Non-native (Source: BIEN and WCVP)	No
2702870	Stenotaphrum secundatum	Stenotaphrum secundatum (Walter) Kuntze	Plantae	Tracheophyta	Liliopsida	Poaceae	Terrestrial		Herb	present	introduced		GRIIS			Yes	Yes	No	37	El Jamaai list; GBIF Morocco; WCVP; GRIIS ; Added: Buanani, R., et al. "INVENTORY OF ORNAMENTAL PLANTS AT THE CAMPUS OF IBN TOFAIL UNIVERSITY, KENITRA (MOROCCO)." Plant Archives 20.2 (2020): 1108-1113.	Keep: from literature	No
4424075	Stenothrips graminum	Stenothrips graminum Uzel, 1895	Animalia	Arthropoda	Insecta	Thripidae		Unknown					no data	no access	Sahara and Sahel Observatory (2020)		No	no data			range Europe from Norway southwards to Iran according to https://keys.lucidcentral.org/keys/v3/british_thrips/the_key/key/britishthysanoptera/Media/Html/Entities/stenothrips_graminum.htm
5326791	Sternbergia lutea	Sternbergia lutea (L.) Ker Gawl. ex Spreng.	Plantae	Tracheophyta	Liliopsida	Amaryllidaceae	Terrestrial		Herb	present	introduced		GloNAF; GRIIS			Yes	Yes	No	3	El Jamaai list; WCVP; GRIIS	Keep: Non-native (Source: WCVP)	No
4504485	Strumigenys membranifera	Strumigenys membranifera Emery, 1869	Animalia	Arthropoda	Insecta	Formicidae	Terrestrial	Omnivore		present	introduced	established	FirstRecords; GRIIS		cited as Pyramica membranifera		Yes	no data			Confirmed by Dr Ahmed Taheri taheri.ahmed@ucd.ac.ma
1320321	Strumigenys rogeri	Strumigenys rogeri Emery, 1890	Animalia	Arthropoda	Insecta	Formicidae		Omnivore					no data		Taheri & Reyes-LÃ³pez (2023)		No				Confirmed by Dr Ahmed Taheri taheri.ahmed@ucd.ac.ma
2331954	Styela plicata	Styela plicata (Lesueur, 1823)	Animalia	Chordata	Ascidiacea	Styelidae	Marine	Unknown			alien		no data	not present	Mghili et al. (2024)		No	Yes			Alien according to https://www.marinespecies.org/aphia.php?p=taxdetails&id=103936#distributions
7777157	Suillus luteus	Suillus luteus (L.) Roussel	Fungi	Basidiomycota	Agaricomycetes	Suillaceae					introduced		MacroFungi	no access			No	no data			non native according to https://www.iucnredlist.org/species/122090818/223016348
5293897	Syagrus romanzoffiana	Syagrus romanzoffiana (Cham.) Glassman	Plantae	Tracheophyta	Liliopsida	Arecaceae	Terrestrial		Herb							Yes	No	No	5	Literature; BIEN; GBIF Morocco; BIEN-native; GRIIS ; Added: Buanani, R., et al. "INVENTORY OF ORNAMENTAL PLANTS AT THE CAMPUS OF IBN TOFAIL UNIVERSITY, KENITRA (MOROCCO)." Plant Archives 20.2 (2020): 1108-1113.	Keep: from literature	No
5194683	Syllis pectinans	Syllis pectinans Haswell, 1920	Animalia	Annelida	Polychaeta	Syllidae		Unknown		present			FirstRecords	no data			No	no data			probably from Australia DOI: 10.11646/zootaxa.4237.2.1
3151391	Symphyotrichum	Symphyotrichum Nees	Plantae	Tracheophyta	Magnoliopsida	Asteraceae			Herb
3151764	Symphyotrichum squamatum	Symphyotrichum squamatum (Spreng.) G.L.Nesom	Plantae	Tracheophyta	Magnoliopsida	Asteraceae	Terrestrial		Herb							Yes	Yes	No	17	iNaturalist; BIEN; GBIF Morocco; WCVP; BIEN-native; GRIIS	Keep: Non-native (Source: WCVP)	No
3088488	Tagetes erecta	Tagetes erecta L.	Plantae	Tracheophyta	Magnoliopsida	Asteraceae	Terrestrial		Herb							Yes	No	No	39	Literature; GBIF Morocco; WCVP; GRIIS ; Added: Buanani, R., et al. "INVENTORY OF ORNAMENTAL PLANTS AT THE CAMPUS OF IBN TOFAIL UNIVERSITY, KENITRA (MOROCCO)." Plant Archives 20.2 (2020): 1108-1113.	Keep: from literature	No
3088481	Tagetes minuta	Tagetes minuta L.	Plantae	Tracheophyta	Magnoliopsida	Asteraceae	Terrestrial		Herb	present	introduced		GRIIS			Yes	Yes	No	49	El Jamaai list; GBIF Morocco; WCVP; GRIIS	Keep: Non-native (Source: WCVP)	No
8177550	Taphrorychus villifrons	Taphrorychus villifrons Wood & Bright, 1992	Animalia	Arthropoda	Insecta	Curculionidae	Terrestrial	Herbivore					no data	no data	Menioui (2021)		No	no data			confirmed by Dr YOUSRA BENYAHIA <benyahia.y@ucd.ac.ma>
3172489	Tecoma capensis	Tecoma capensis (Thunb.) Lindl.	Plantae	Tracheophyta	Magnoliopsida	Bignoniaceae	Terrestrial		Herb							Yes	No	Yes	18	Literature; BIEN; BIEN-native; GRIIS; GISD; GRIIS, GISD ; Added: Buanani, R., et al. "INVENTORY OF ORNAMENTAL PLANTS AT THE CAMPUS OF IBN TOFAIL UNIVERSITY, KENITRA (MOROCCO)." Plant Archives 20.2 (2020): 1108-1113.	Keep: from literature	No
2925649	Tectona grandis	Tectona grandis L.f.	Plantae	Tracheophyta	Magnoliopsida	Lamiaceae	Terrestrial		Herb							Yes	No	No	25	iNaturalist; GBIF Morocco; GRIIS		No
2288844	Teredo bartschi	Teredo bartschi Clapp, 1923	Animalia	Mollusca	Bivalvia	Teredinidae	Marine	Filter-feeder		present		invasive	no data	no data	El Jamaai et al. (2025)		No	no data			Confirmed by Jazila EL Jamaai
5994632	Teretrius accaciae	Teretrius accaciae Reitter, 1900	Animalia	Arthropoda	Insecta	Histeridae	Terrestrial	Unknown					no data	no data	Menioui (2021)		No	no data			confirmed by Dr YOUSRA BENYAHIA <benyahia.y@ucd.ac.ma>
5994679	Teretrius corticalis	Teretrius corticalis Wollaston, 1867	Animalia	Arthropoda	Insecta	Histeridae	Terrestrial	Unknown					no data	no data	Menioui (2021)		No	no data			confirmed by Dr YOUSRA BENYAHIA <benyahia.y@ucd.ac.ma>
5994686	Teretrius kraatzi	Teretrius kraatzi Marseul, 1863	Animalia	Arthropoda	Insecta	Histeridae	Terrestrial	Unknown					no data	no data	Menioui (2021)		No	no data			confirmed by Dr YOUSRA BENYAHIA <benyahia.y@ucd.ac.ma>
5994651	Teretrius pulex	Teretrius pulex Fairmaire, 1877	Animalia	Arthropoda	Insecta	Histeridae	Terrestrial	Unknown					no data	no data	Menioui (2021)		No	no data			confirmed by Dr YOUSRA BENYAHIA <benyahia.y@ucd.ac.ma>
1323402	Tetramorium bicarinatum	Tetramorium bicarinatum (Nylander, 1846)	Animalia	Arthropoda	Insecta	Formicidae	Terrestrial	Omnivore		present	introduced		GRIIS				Yes	no data			Confirmed by Dr Ahmed Taheri taheri.ahmed@ucd.ac.ma
1323493	Tetramorium caldarium	Tetramorium caldarium (Roger, 1857)	Animalia	Arthropoda	Insecta	Formicidae	Terrestrial	Omnivore		present	introduced	established	FirstRecords; GRIIS				Yes	no data			Confirmed by Dr Ahmed Taheri taheri.ahmed@ucd.ac.ma
1323448	Tetramorium lanuginosum	Tetramorium lanuginosum Mayr, 1870	Animalia	Arthropoda	Insecta	Formicidae	Terrestrial	Omnivore		present	introduced		GRIIS				Yes	no data			Confirmed by Dr Ahmed Taheri taheri.ahmed@ucd.ac.ma
2130256	Tetranychus evansi	Tetranychus evansi Baker & Pritchard, 1960	Animalia	Arthropoda	Arachnida	Tetranychidae		Unknown					no data	no access	Sahara and Sahel Observatory (2020)		No	no data			native fromÂ South America https://doi.org/10.1016/j.tree.2019.08.013
2130252	Tetranychus turkestani	Tetranychus turkestani (Ugarov & Nikolskii, 1937)	Animalia	Arthropoda	Arachnida	Tetranychidae		Unknown					no data	no access	Sahara and Sahel Observatory (2020)		No	no data			no info on native range/ present in Morocco https://www1.montpellier.inrae.fr/CBGP/spmweb/pdf/Authors_S/Saba_1973b.pdf
2130185	Tetranychus urticae	Tetranychus urticae Koch, 1836	Animalia	Arthropoda	Arachnida	Tetranychidae	Terrestrial	Unknown					no data	present	Menioui (2021); Sahara and Sahel Observatory (2020)		No	no data			originally native only toÂ Eurasia
3052680	Thlaspi arvense	Thlaspi arvense L.	Plantae	Tracheophyta	Magnoliopsida	Brassicaceae	Terrestrial		Herb		introduced		GloNAF	introduced		Yes	No	No	23	El Jamaai list; GBIF Morocco; WCVP; GRIIS	Keep: Non-native (Source: WCVP)	No
5203999	Thymallus thymallus	Thymallus thymallus (Linnaeus, 1758)	Animalia	Chordata		Salmonidae		Predator		present	vagrant	casual	FirstRecords	no access			No	no data			non native https://www.iucnredlist.org/species/266178365/135093349
2362524	Tinca tinca	Tinca tinca (Linnaeus, 1758)	Animalia	Chordata		Cyprinidae	Freshwater; Brackish	Omnivore		present	introduced	established	FirstRecords; GRIIS	introduced	Menioui (2021)		Yes	Yes			introduced according to https://www.iucnredlist.org/species/21912/2780110
5396557	Tithonia diversifolia	Tithonia diversifolia (Hemsl.) A.Gray	Plantae	Tracheophyta	Magnoliopsida	Asteraceae	Terrestrial		Herb							Yes	No	Yes	69	Literature; GRIIS; GISD; GRIIS, GISD ; Added: LâˆšÂ©ger, J.-F., Chambouleyron, M., Herment, P.-C., Verloove, F., Chatelain, C., Mombrial, F., Andrieu, F., Homrani Bakali, A., & Tanji, A. (2025). Contribution âˆšâ€ la connaissance de la flore du Maroc, notamment de plantes exogâˆšÂ®nes naturalisâˆšÂ©es. Carnets botaniques, 266. https://doi.org/10.34971/A41W-AC47		Yes
3169713	Trachelospermum jasminoides	Trachelospermum jasminoides (Lindl.) Lem.	Plantae	Tracheophyta	Magnoliopsida	Apocynaceae	Terrestrial		Herb							Yes	No	No	1	iNaturalist; GRIIS		No
7707728	Tracheophyta	Tracheophyta	Plantae	Tracheophyta			Freshwater		Herb	present	introduced		GRIIS				Yes	non native			Keep: Non-native (Source: WCVP)
2765221	Tradescantia pallida	Tradescantia pallida (Rose) D.R.Hunt	Plantae	Tracheophyta	Liliopsida	Commelinaceae	Terrestrial		Herb							Yes	No	No	24	iNaturalist; GBIF Morocco; GRIIS		No
4985072	Tricellaria inopinata	Tricellaria inopinata d'Hondt & Occhipinti Ambrogi, 1985	Animalia	Bryozoa	Gymnolaemata	Candidae	Marine	Unknown			Alien		no data	not present	Mghili et al. (2024)		No	no data			alien according to https://www.marinespecies.org/aphia.php?p=taxdetails&id=111254#distributions
2049936	Trichocorixa verticalis	Trichocorixa verticalis (Fieber, 1851)	Animalia	Arthropoda	Insecta	Corixidae	host	Unknown		present	introduced		GRIIS	not present	Menioui (2021)		Yes	no data			Alien according to https://www.limnetica.com/documentos/limnetica/limnetica-39-1-p-49.pdf
8729567	Trichomyrmex destructor	Trichomyrmex destructor (Jerdon, 1851)	Animalia	Arthropoda	Insecta	Formicidae		Omnivore		present	introduced	established	FirstRecords		cited as Monomorium destructor		No	non native			Confirmed by Dr Ahmed Taheri taheri.ahmed@ucd.ac.ma
4282894	Tridentata marginata	Tridentata marginata (Kirchenpauer, 1864)	Animalia	Cnidaria	Hydrozoa	Sertulariidae	Marine	Unknown			Alien	established	no data		Mghili et al. (2024)		No				alien according to https://www.marinespecies.org/aphia.php?p=taxdetails&id=418905#distributions
5358907	Trifolium alexandrinum	Trifolium alexandrinum L.	Plantae	Tracheophyta	Magnoliopsida	Fabaceae	Terrestrial		Herb	present	introduced		GloNAF; GRIIS			Yes	Yes	No	10	El Jamaai list; BIEN; GBIF Morocco; WCVP; BIEN-native; GRIIS	Keep: Non-native (Source: WCVP)	No
5359378	Trifolium incarnatum	Trifolium incarnatum L.	Plantae	Tracheophyta	Magnoliopsida	Fabaceae	Terrestrial		Herb	present	introduced		GloNAF; GRIIS			Yes	Yes	No	20	El Jamaai list; GBIF Morocco; WCVP; GRIIS	Keep: Non-native (Source: WCVP)	No
2865321	Triglochin striata	Triglochin striata Ruiz & Pav.	Plantae	Tracheophyta	Liliopsida	Juncaginaceae	Terrestrial		Herb		introduced		GloNAF	not present	Menioui (2021)	Yes	No	No	1	El Jamaai list; GBIF Morocco; WCVP; GRIIS	Keep: Non-native (Source: WCVP)	No
5360475	Trigonella foenum-graecum	Trigonella foenum-graecum L.	Plantae	Tracheophyta	Magnoliopsida	Fabaceae	Terrestrial		Herb	present	introduced		GloNAF; GRIIS			Yes	Yes	No	14	El Jamaai list; BIEN; GBIF Morocco; WCVP; BIEN-native; GRIIS	Keep: Non-native (Source: WCVP)	No
1095979	Trogoderma granarium	Trogoderma granarium Everts, 1898	Animalia	Arthropoda	Insecta	Dermestidae	Terrestrial	Detritivore					no data				No	Yes			confirmed by Dr YOUSRA BENYAHIA <benyahia.y@ucd.ac.ma>
2889934	Tropaeolum majus	Tropaeolum majus L.	Plantae	Tracheophyta	Magnoliopsida	Tropaeolaceae	Terrestrial		Herb		introduced		GloNAF	introduced		Yes	No	No	44	El Jamaai list; iNaturalist; GBIF Morocco; WCVP; GRIIS	Keep: Non-native (Source: WCVP)	No
4528099	Tuta absoluta	Tuta absoluta (Meyrick, 1917)	Animalia	Arthropoda	Insecta	Gelechiidae		Unknown					no data	introduced	Sahara and Sahel Observatory (2020)		No	no data			non native according to DOI: 10.2298/PIF1103197T
3974754	Vachellia karroo	Vachellia karroo (Hayne) Banfi & Galasso	Plantae	Tracheophyta	Magnoliopsida	Fabaceae	Terrestrial		Herb	present	introduced		GloNAF; GRIIS	no data		Yes	No	No	7	El Jamaai list; iNaturalist; BIEN; GBIF Morocco; WCVP; BIEN-native; GRIIS	Keep: Non-native (Source: BIEN and WCVP)	No
3147913	Verbesina encelioides	Verbesina encelioides (Cav.) Benth. & Hook.fil. ex A.Gray	Plantae	Tracheophyta	Magnoliopsida	Asteraceae	Terrestrial		Herb	present	introduced		GloNAF; GRIIS		Menioui (2021); Sahara and Sahel Observatory (2020)	Yes	Yes	No	26	El Jamaai list; BIEN; GBIF Morocco; WCVP; BIEN-native; GRIIS	Keep: Non-native (Source: WCVP)	No
3172077	Veronica persica	Veronica persica Poir.	Plantae	Tracheophyta	Magnoliopsida	Plantaginaceae	Terrestrial		Herb		introduced		GloNAF	no access		Yes	No	No	40	El Jamaai list; BIEN; GBIF Morocco; WCVP; BIEN-native; GRIIS	Keep: Non-native (Source: BIEN and WCVP)	No
1311477	Vespa velutina	Vespa velutina Lepeletier, 1836	Animalia	Arthropoda	Insecta	Vespidae	Terrestrial	Predator					no data	not present	Menioui (2021)		No	non native			confirmed by Dr YOUSRA BENYAHIA <benyahia.y@ucd.ac.ma>
2974887	Vicia ervilia	Vicia ervilia (L.) Willd.	Plantae	Tracheophyta	Magnoliopsida	Fabaceae	Terrestrial		Herb		introduced		GloNAF	no access		Yes	No	No	16	El Jamaai list; BIEN; GBIF Morocco; WCVP; BIEN-native; GRIIS	Keep: Non-native (Source: WCVP)	No
2974832	Vicia faba	Vicia faba L.	Plantae	Tracheophyta	Magnoliopsida	Fabaceae	Terrestrial		Herb		introduced		GloNAF	no access		Yes	No	No	22	El Jamaai list; BIEN; GBIF Morocco; WCVP; BIEN-native; GRIIS	Keep: Non-native (Source: WCVP)	No
2974811	Vicia pannonica	Vicia pannonica Crantz	Plantae	Tracheophyta	Magnoliopsida	Fabaceae	Terrestrial		Herb	present	introduced		GRIIS			Yes	Yes	No	10	El Jamaai list; GBIF Morocco; WCVP; GRIIS	Keep: Non-native (Source: WCVP)	No
5406665	Waltheria indica	Waltheria indica L.	Plantae	Tracheophyta	Magnoliopsida	Malvaceae	Terrestrial		Herb							Yes	No	No	26	iNaturalist; GRIIS		No
5294589	Washingtonia filifera	Washingtonia filifera (Rafarin) H.Wendl. ex de Bary	Plantae	Tracheophyta	Liliopsida	Arecaceae	Terrestrial		Herb							Yes	No	No	10	iNaturalist; GRIIS		No
5294595	Washingtonia robusta	Washingtonia robusta H.Wendl.	Plantae	Tracheophyta	Liliopsida	Arecaceae	Terrestrial		Herb							Yes	No	No	14	Literature; GBIF Morocco; GRIIS ; Added: Buanani, R., et al. "INVENTORY OF ORNAMENTAL PLANTS AT THE CAMPUS OF IBN TOFAIL UNIVERSITY, KENITRA (MOROCCO)." Plant Archives 20.2 (2020): 1108-1113.	Keep: from literature	No
3089146	Xanthium orientale	Xanthium orientale L.	Plantae	Tracheophyta	Magnoliopsida	Asteraceae	Terrestrial		Herb	present	introduced		GRIIS		Sahara and Sahel Observatory (2020)	Yes	Yes	No	20	El Jamaai list; BIEN; GBIF Morocco; WCVP; BIEN-native; GRIIS	Keep: Non-native (Source: WCVP)	No
3089150	Xanthium spinosum	Xanthium spinosum L.	Plantae	Tracheophyta	Magnoliopsida	Asteraceae	Terrestrial		Herb	present	introduced		GRIIS		Sahara and Sahel Observatory (2020)	Yes	Yes	Yes	62	El Jamaai list; BIEN; GBIF Morocco; WCVP; BIEN-native; GRIIS; GISD; GRIIS, GISD	Keep: Non-native (Source: BIEN and WCVP)	Yes
4468550	Xyleborinus saxesenii	Xyleborinus saxesenii (Ratzeburg, 1837) Ratzeburg, 1837	Animalia	Arthropoda	Insecta	Curculionidae	Terrestrial	Herbivore					no data	native	Menioui (2021) also cited as Xyleborinus saxeseni		No	no data			confirmed by Dr YOUSRA BENYAHIA <benyahia.y@ucd.ac.ma>
6005879	Xylomedes coronata	Xylomedes coronata (Marseul, 1883)	Animalia	Arthropoda	Insecta	Bostrichidae	Terrestrial	Herbivore					no data	no data	Menioui (2021)		No	no data			confirmed by Dr YOUSRA BENYAHIA <benyahia.y@ucd.ac.ma>
2775744	Yucca aloifolia	Yucca aloifolia L.	Plantae	Tracheophyta	Liliopsida	Asparagaceae	Terrestrial		Herb							Yes	No	No	12	Literature; GRIIS ; Added: Buanani, R., et al. "INVENTORY OF ORNAMENTAL PLANTS AT THE CAMPUS OF IBN TOFAIL UNIVERSITY, KENITRA (MOROCCO)." Plant Archives 20.2 (2020): 1108-1113.	Keep: from literature	No
2775716	Yucca gigantea	Yucca gigantea Lem.	Plantae	Tracheophyta	Liliopsida	Asparagaceae	Terrestrial		Herb							Yes	No	No	1	Literature; GRIIS ; Added: Buanani, R., et al. "INVENTORY OF ORNAMENTAL PLANTS AT THE CAMPUS OF IBN TOFAIL UNIVERSITY, KENITRA (MOROCCO)." Plant Archives 20.2 (2020): 1108-1113.	Keep: from literature	No
2775619	Yucca gloriosa	Yucca gloriosa L.	Plantae	Tracheophyta	Liliopsida	Asparagaceae	Terrestrial		Herb							Yes	No	No	13	iNaturalist; GRIIS		No
2868827	Zantedeschia aethiopica	Zantedeschia aethiopica (L.) Spreng.	Plantae	Tracheophyta	Liliopsida	Araceae	Terrestrial		Herb	present	introduced		GloNAF; GRIIS			Yes	Yes	Yes	31	El Jamaai list; GBIF Morocco; WCVP; GRIIS; GISD; GRIIS, GISD	Keep: Non-native (Source: WCVP)	No
3039423	Ziziphus jujuba	Ziziphus jujuba Mill.	Plantae	Tracheophyta	Magnoliopsida	Rhamnaceae	Terrestrial		Herb							Yes	No	No	12	iNaturalist; BIEN; GBIF Morocco; WCVP; BIEN-native; GRIIS	Keep: Non-native (Source: BIEN and WCVP)	No
2402128	Acipenser baerii	Acipenser baerii Brandt, 1869	Animalia	Chordata	Actinopterygii	Acipenseriformes	Freshwater	Unknown													Added by Pr. Nard Bennas (Feb 2026)
2340989	Ameiurus melas	Ameiurus melas (Rafinesque, 1820)	Animalia	Chordata	Actinopterygii	Acipenseriformes	Freshwater	Unknown													Added by Pr. Nard Bennas (Feb 2026)
2362635	Ctenopharyngodon idella	Ctenopharyngodon idella (Valenciennes, 1844)	Animalia	Chordata	Actinopterygii	Acipenseriformes	Freshwater	Unknown													Added by Pr. Nard Bennas (Feb 2026)

## Sheet: DDBB_Consulted
Description	Databases consulted to obtain the list of introduced and invasive alien species in Morocco
Columns	Description or categories and description
Lists	Title of the source
Authors	Authors of the source
Number of species	Number of invasive alien species or introduced species present in the source
Link	Link to the source
Consulted	Date for the download of the dataset
Lists	Authors	Number of species	Link	Consulted
Global Invasive Species Database		104	https://www.iucngisd.org/gisd/	21/10/2024
Standardising and Integrating Alien Species workflow	Seebens et al. (2020)	368	https://zenodo.org/record/3972555	22/10/2024
Terrestrial Invasive Alien Species in the Arab Maghreb	CBD-OSS	99	https://www.cbd.int/invasive/doc/arab-maghreb-eee-fr.pdf
Elements for Reflection on Primary Invasive Alien Species in Morocco	Menioui, M. (2021)	146	https://doi.org/10.1002/9781119607045.ch7
Distribution of Freshwater Alien Animal Species in Morocco: Current Knowledge and Management Issues	Taybi et al. (2023)	41	https://doi.org/10.3390/d15020169
Updating the National List of Marine Alien Species in Morocco	Mghili et al. (2024)	61	http://dx.doi.org/10.12681/mms.35846
The alien flora of Morocco	Canavan et al. (in prep)	409

## Sheet: Excluded_cultivated_taxa
scientificname	family	invasive_elsewhere_griis	invasive_morocco_griis	in_global_impact_database_gisd	number_countries_invasive	high_impact_species	data_sources	is_crop
Avena sativa	Poaceae	Yes	No	No	37	No	BIEN; GBIF Morocco; WCVP; BIEN-native; GRIIS	TRUE
Hordeum vulgare	Poaceae	Yes	No	No	33	No	BIEN; GBIF Morocco; WCVP; BIEN-native; GRIIS	TRUE
Oryza sativa	Poaceae	Yes	No	No	27	No	BIEN; GBIF Morocco; WCVP; BIEN-native; GRIIS	TRUE
Pennisetum glaucum	Poaceae	Yes	Yes	No	11	No	El Jammai list; GBIF Morocco; WCVP; GRIIS	TRUE
Secale cereale	Poaceae	Yes	Yes	No	33	No	El Jammai list; BIEN; GBIF Morocco; WCVP; BIEN-native; GRIIS	TRUE
Solanum lycopersicum	Solanaceae	Yes	No	No	56	Yes	iNaturalist; BIEN; GBIF Morocco; BIEN-native; GRIIS	TRUE
Solanum tuberosum	Solanaceae	Yes	No	No	37	No	iNaturalist; GBIF Morocco; GRIIS	TRUE
Triticum aestivum	Poaceae	Yes	No	No	30	No	BIEN; GBIF Morocco; WCVP; BIEN-native; GRIIS	TRUE
Triticum monococcum	Poaceae	Yes	No	No	4	No	BIEN; GBIF Morocco; WCVP; BIEN-native; GRIIS	TRUE
Triticum turgidum	Poaceae	Yes	No	No	10	No	BIEN; GBIF Morocco; WCVP; BIEN-native; GRIIS	TRUE
Zea mays	Poaceae	Yes	No	No	40	No	BIEN; GBIF Morocco; WCVP; BIEN-native; GRIIS	TRUE
