# Supplementary material
Source: Research Square preprint supplement (doi:10.21203/rs.3.rs-9794069/v1)
Supplement: Supplementary file 3 [file e52ce1d20b43b8e4dd7f527d.xlsx]

## Sheet: Metadata
	Title: Table S3. Management, Pathways, and Economic Impact.
	Description: This dataset compiles the applied management outputs of the study, supporting the prioritization framework and policy recommendations. It integrates introduction pathway classifications, a stratified management priority list, and global economic cost estimates.
	Sheet Name	Description	Column Name	Column Definition
	1_Introduction_Pathways & Management_Priorities	Classification of introduction pathways for each species, categorized according to the CBD/GIASIP standard hierarchy (e.g., Escape from Confinement, Stowaway). Classifications are derived from a hierarchical dual-database approach (Saul et al., 2017; Turbelin et al., 2022).	Scientific_Name	Accepted scientific name of the invasive species.
			Pathway_Main	Broad category of introduction pathway according to the CBD/GIASIP standard hierarchy (e.g., Escape from Confinement, Stowaway).
			Pathway_Detail	Specific route of introduction derived from Saul et al. (2017) and Turbelin et al. (2022).
			Management_Category	The assigned operational tier (Containment-Terrestrial, Containment-Aquatic, EDRR Candidates, or Latent Risk).
	2_Economic_Costs	A compilation of reported global economic costs (USD) associated with the invasive species present in Morocco using the InvaCost database.	Scientific_Name	Accepted scientific name of the invasive species.
			Management_Tier	The operational management tier assigned to the species.
			n_Cost_Entries	Number of cost entries recorded in the InvaCost database.
			Mean_Annual_Cost_USD	Calculated mean annual economic cost in USD.
			Total_Cumulative_Cost_USD	Total cumulative economic cost in USD.
			First_Year	First year of recorded economic cost data.
			Last_Year	Last year of recorded economic cost data.
	3_Watch_List	A horizon-scanning list of high-risk species not yet established in Morocco (according to GRISS) but present in neighboring regions (e.g., Iberian Peninsula, Maghreb) or identified as high-risk trade contaminants. Recommended for early detection surveillance.	Scientific_Name	Accepted scientific name of the high-risk species.
			family	Taxonomic family of the species.
			invasive_elsewhere_griis	Indicates whether the species is recorded as invasive in other regions according to the Global Register of Introduced and Invasive Species (GRIIS).
			invasive_morocco_griis	Tracks any recorded presence or invasion status in Morocco according to GRIIS.
			in_global_impact_database_gisd	Indicates whether the species is listed in the IUCN Global Invasive Species Database (GISD)
			number_countries_invasive	The total number of countries where the species is currently reported as invasive.
			high_impact_species	Flag indicating if the species is categorized as having severe environmental or economic impacts.
			data_sources	The database, literature, or expert source from which the watchlist assessment data was derived.
			is_crop	Indicates whether the species is primarily cultivated as an agricultural crop.

## Sheet: 1_Intro_Pathways & Manag_Priori
Scientific_Name	Pathway_Main	Pathway_Detail	Management_Category
Abutilon grandifolium	Escape	Plants	EDRR Candidates
Abutilon theophrasti	Escape	Plants	EDRR Candidates
Acacia baileyana	Escape	Plants	Latent Risk
Acacia cyclops	Escape	Plants	EDRR Candidates
Acacia dealbata	Escape	Plants	Latent Risk
Acacia farnesiana	Escape	Plants	EDRR Candidates
Acacia horrida	Unknown	Unknown	Latent Risk
Acacia karroo	Unknown	Unknown	Containment (Terrestrial)
Acacia longifolia	Escape	Plants	Latent Risk
Acacia mearnsii	Escape	Plants	Latent Risk
Acacia melanoxylon	Escape	Plants	EDRR Candidates
Acacia pycnantha	Escape	Plants	Latent Risk
Acacia retinodes	Escape	Plants	Latent Risk
Acacia salicina	Unknown	Unknown	Latent Risk
Acacia saligna	Escape	Plants	Containment (Terrestrial)
Acalypha wilkesiana	Unknown	Unknown	Latent Risk
Acanthospermum hispidum	Unknown	Unknown	Latent Risk
Acer negundo	Escape	Plants	Latent Risk
Achatina fulica (Bowdich, 1822)	Unknown	Unknown	EDRR Candidates
Acleris undulana (Walsingham, 1900)	Unknown	Unknown	EDRR Candidates
Aedes aegypti (Linnaeus, 1762)	Unknown	Unknown	EDRR Candidates
Aedes albopictus (Skuse, 1895)	Unknown	Unknown	Containment (Aquatic)
Agave americana	Escape	Plants	Containment (Terrestrial)
Agave sisalana	Escape	Plants	EDRR Candidates
Ageratina adenophora	Contaminant	Contaminant	EDRR Candidates
Ageratum conyzoides	Escape	Plants	Latent Risk
Ageratum houstonianum	Escape	Plants	Latent Risk
Ailanthus altissima	Escape	Plants	EDRR Candidates
Albizia julibrissin	Escape	Plants	Latent Risk
Alburnus alburnus (Linnaeus, 1758)	Unknown	Unknown	Containment (Aquatic)
Alcea rosea	Escape	Plants	Latent Risk
Allium cepa	Escape	Plants	Latent Risk
Allium neapolitanum	Escape	Plants	Latent Risk
Allium sativum	Escape	Plants	Latent Risk
Aloe arborescens	Escape	Escape	Latent Risk
Aloe maculata	Escape	Escape	Latent Risk
Aloe vera	Contaminant	Contaminant	EDRR Candidates
Aluterus monoceros (Linnaeus, 1758)	Stowaway	Unknown	Containment (Aquatic)
Amaranthus albus	Escape	Plants	EDRR Candidates
Amaranthus blitoides	Escape	Plants	EDRR Candidates
Amaranthus blitum	Escape	Plants	EDRR Candidates
Amaranthus cruentus	Escape	Plants	Latent Risk
Amaranthus deflexus	Escape	Plants	EDRR Candidates
Amaranthus hybridus	Escape	Plants	EDRR Candidates
Amaranthus hypochondriacus	Escape	Plants	EDRR Candidates
Amaranthus muricatus	Escape	Plants	EDRR Candidates
Amaranthus palmeri	Escape	Plants	Latent Risk
Amaranthus powellii	Escape	Plants	EDRR Candidates
Amaranthus retroflexus	Escape	Plants	EDRR Candidates
Amaranthus spinosus	Escape	Plants	Latent Risk
Amaranthus standleyanus	Escape	Plants	EDRR Candidates
Amaranthus viridis	Escape	Plants	EDRR Candidates
Ambrosia maritima	Unknown	Unknown	EDRR Candidates
Ambrosia psilostachya	Unknown	Unknown	Latent Risk
Ammannia latifolia	Unknown	Unknown	EDRR Candidates
Anguillicola crassus Kuwahara, Niimi & Itagaki, 1974	Stowaway	Unknown	Containment (Aquatic)
Anredera cordifolia	Escape	Plants	Latent Risk
Antirrhinum majus	Escape	Plants	Latent Risk
Apate monachus	Stowaway	Invertebrates	EDRR Candidates
Acipenser baerii Brandt, 186	Stowaway	Unknown	Containment (Aquatic)
Ameiurus melas (Rafinesque, 1820)	Stowaway	Unknown	Containment (Aquatic)
Ctenopharyngodon idella (Valenciennes, 1844)	Stowaway	Unknown	Containment (Aquatic)
Aphytis lingnanensis Compere, 1955	Unknown	Unknown	EDRR Candidates
Arctotheca calendula	Escape	Plants	Containment (Terrestrial)
Argemone mexicana	Escape	Plants	Latent Risk
Argiope trifasciata (Forsskål, 1775)	Unknown	Unknown	EDRR Candidates
Aristichthys nobilis (Richardson, 1845) = Hypophthalmichthys nobilis (Richardson, 1845)	Unknown	Unknown	Containment (Aquatic)
Artemia franciscana (Kellogg, 1906)	Unknown	Unknown	Containment (Aquatic)
Artemia monica Verrill, 1869	Stowaway	Unknown	Containment (Aquatic)
Artemisia verlotiorum	Escape	Plants	EDRR Candidates
Arundo donax	Escape	Plants	Containment (Terrestrial)
Asclepias curassavica	Escape	Plants	Containment (Terrestrial)
Asparagus aethiopicus	Unknown	Unknown	Latent Risk
Asparagus asparagoides	Escape	Plants	EDRR Candidates
Asparagus officinalis	Escape	Plants	Latent Risk
Astacus astacus (Linnaeus, 1758)	Unknown	Unknown	EDRR Candidates
Aster subulatus	Unknown	Unknown	Latent Risk
Asteriscus sericeus	Unknown	Unknown	EDRR Candidates
Atherina boyeri Risso, 1810	Stowaway	Unknown	Containment (Aquatic)
Atriplex canescens	Unknown	Unknown	EDRR Candidates
Atriplex nummularia	Unknown	Unknown	EDRR Candidates
Atriplex semibaccata	Escape	Plants	Containment (Terrestrial)
Atriplex suberecta	Stowaway	Plants	EDRR Candidates
Aurelia aurita (Linnaeus, 1758)	Stowaway	Unknown	Containment (Aquatic)
Austrocylindropuntia cylindrica	Escape	Plants	Latent Risk
Austrocylindropuntia subulata	Escape	Plants	Latent Risk
Avena byzantina	Escape	Plants	Latent Risk
Azolla filiculoides	Escape	Plants	Containment (Aquatic)
Bactrocera cucurbitae (Coquillett, 1899)	Unknown	Unknown	EDRR Candidates
Bactrocera dorsalis (Hendel, 1912)	Unknown	Unknown	EDRR Candidates
Bactrocera zonata (Saunders, 1841)	Unknown	Unknown	EDRR Candidates
Bambusa multiplex	Unknown	Unknown	Latent Risk
Barbus barbus (Linnaeus, 1758)	Unknown	Unknown	Containment (Aquatic)
Bassia indica	Unknown	Unknown	EDRR Candidates
Bassia scoparia	Release	Release	EDRR Candidates
Bauhinia purpurea	Unknown	Unknown	Latent Risk
Bauhinia variegata	Unknown	Unknown	Latent Risk
Bemisia tabaci (Gennadius, 1889)	Unknown	Unknown	EDRR Candidates
Bidens aurea	Escape	Plants	EDRR Candidates
Bidens frondosa	Escape	Plants	Latent Risk
Bidens pilosa	Escape	Plants	EDRR Candidates
Bipolaris hawaiiensis (Ellis) Uchida & Aragachi 1979	Unknown	Unknown	EDRR Candidates
Botrylloides niger Herdman, 1886	Stowaway	Unknown	Containment (Aquatic)
Bougainvillea buttiana	Unknown	Unknown	Latent Risk
Bougainvillea glabra	Unknown	Unknown	Latent Risk
Bougainvillea spectabilis	Unknown	Unknown	Latent Risk
Brachychiton populneus	Escape	Plants	Latent Risk
Branchiomma luctuosum (Grube, 1870)	Stowaway	Unknown	Containment (Aquatic)
Brassica napus	Escape	Plants	Latent Risk
Brassica oleracea	Escape	Plants	Latent Risk
Bromus catharticus	Escape	Plants	EDRR Candidates
Bryophyllum fedtschenkoi	Unknown	Unknown	Latent Risk
Buddleja davidii	Escape	Plants	Latent Risk
Bursatella leachii Blainville, 1817	Stowaway	Unknown	Containment (Aquatic)
Caesalpinia gilliesii	Escape	Plants	Latent Risk
Caesalpinia spinosa	Unknown	Unknown	Latent Risk
Calendula officinalis	Escape	Plants	EDRR Candidates
Callinectes sapidus Rathbun, 1896	Stowaway	Unknown	Containment (Aquatic)
Callistemon citrinus	Escape	Plants	Latent Risk
Callistemon viminalis	Unknown	Unknown	Latent Risk
Calopertha subretusa	Unknown	Unknown	EDRR Candidates
Campsis radicans	Unknown	Unknown	Latent Risk
Canna indica	Escape	Plants	Latent Risk
Cannabis sativa	Escape	Plants	Latent Risk
Caprella scaura Templeton, 1836	Stowaway	Unknown	Containment (Aquatic)
Capsicum annuum	Escape	Plants	Latent Risk
Carassius auratus (Linnaeus, 1758)	Unknown	Unknown	Containment (Aquatic)
Carcharhinus altimus (Springer, 1950)	Unknown	Unknown	EDRR Candidates
Cardamine flexuosa	Stowaway	Plants	Latent Risk
Cardiocondyla emeryi Forel, 1881	Unknown	Unknown	EDRR Candidates
Cardiocondyla obscurior Wheeler, 1929	Unknown	Unknown	EDRR Candidates
Cardiospermum halicacabum	Escape	Plants	Latent Risk
Carpobrotus acinaciformis	Escape	Plants	EDRR Candidates
Carpobrotus chilensis	Escape	Plants	Latent Risk
Carpobrotus edulis	Escape	Plants	Latent Risk
Carthamus tinctorius	Escape	Plants	Latent Risk
Cassida nebulosa	Unknown	Unknown	EDRR Candidates
Castanea sativa	Escape	Plants	Latent Risk
Casuarina cunninghamiana	Escape	Plants	Latent Risk
Catharanthus roseus	Escape	Plants	Latent Risk
Catocala nymphagoga Esper, 1787	Unknown	Unknown	EDRR Candidates
Ceiba speciosa	Unknown	Unknown	Latent Risk
Cenchrus longispinus	Escape	Plants	EDRR Candidates
Centaurea benedicta	Unknown	Unknown	EDRR Candidates
Cephalaria syriaca	Stowaway	Plants	Latent Risk
Ceratitis capitata (Wiedemann, 1824)	Unknown	Unknown	EDRR Candidates
Cereus hildmannianus	Unknown	Unknown	Latent Risk
Cervus nippon Temminck, 1838	Unknown	Unknown	EDRR Candidates
Cestrum elegans	Unknown	Unknown	Latent Risk
Chaenomeles speciosa	Escape	Plants	Latent Risk
Chenopodium bonus-henricus	Escape	Plants	EDRR Candidates
Chenopodium ficifolium	Escape	Plants	Latent Risk
Chenopodium giganteum	Unknown	Unknown	EDRR Candidates
Cherax quadricarinatus (von Martens, 1868)	Unknown	Unknown	EDRR Candidates
Chloris gayana	Escape	Plants	EDRR Candidates
Chlorophytum comosum	Escape	Plants	Latent Risk
Chorispora tenella	Escape	Plants	Latent Risk
Cinara (Cupressobium) cupressi (Buckton, 1881)	Unknown	Unknown	EDRR Candidates
Citrus limon	Escape	Plants	Latent Risk
Clytia linearis (Thorneley, 1900)	Stowaway	Unknown	Containment (Aquatic)
Colocasia esculenta	Escape	Plants	EDRR Candidates
Colpomenia peregrina Sauvageau, 1927	Stowaway	Unknown	Containment (Aquatic)
Corbicula fluminea (O. F. Müller, 1774)	Unknown	Unknown	Containment (Aquatic)
Corchorus olitorius	Escape	Plants	EDRR Candidates
Coriandrum sativum	Escape	Plants	EDRR Candidates
Cortaderia selloana	Escape	Plants	EDRR Candidates
Corvus splendens Vieillot, 1817	Unknown	Unknown	EDRR Candidates
Corymbia ficifolia	Unknown	Unknown	Latent Risk
Cotula coronopifolia	Escape	Plants	EDRR Candidates
Crepidula fornicata (Linnaeus, 1758)	Stowaway	Unknown	Containment (Aquatic)
Cryphalus piceae	Stowaway	Invertebrates	EDRR Candidates
Cryptotermes brevis (Walker, 1853)	Unknown	Unknown	EDRR Candidates
Ctenopharyngodon idella (Valenciennes, 1844)	Unknown	Unknown	Containment (Aquatic)
Cucumis melo	Escape	Plants	Latent Risk
Cucurbita maxima	Escape	Plants	Latent Risk
Cucurbita moschata	Escape	Plants	Latent Risk
Cuminum cyminum	Escape	Plants	Latent Risk
Cupressus arizonica	Escape	Plants	Latent Risk
Cupressus sempervirens	Escape	Plants	Latent Risk
Cuscuta australis	Unknown	Unknown	Latent Risk
Cuscuta campestris	Escape	Plants	Latent Risk
Cuscuta indecora	Unknown	Unknown	Latent Risk
Cuscuta pentagona	Unknown	Unknown	Latent Risk
Cutleria multifida (Turner) Greville 1830	Stowaway	Unknown	Containment (Aquatic)
Cyanus segetum	Unknown	Unknown	EDRR Candidates
Cydia pomonella (Linnaeus, 1758)	Unknown	Unknown	EDRR Candidates
Cydonia oblonga	Escape	Plants	Latent Risk
Cylindropuntia imbricata	Escape	Plants	Latent Risk
Cymbalaria muralis	Escape	Plants	Latent Risk
Cyperus difformis	Escape	Plants	EDRR Candidates
Cyperus eragrostis	Escape	Plants	Latent Risk
Cyprinus carpio Linnaeus, 1758	Unknown	Unknown	Containment (Aquatic)
Dactylopius opuntiae (Cockerell, 1896)	Unknown	Unknown	EDRR Candidates
Dacus frontalis	Unknown	Unknown	EDRR Candidates
Dasypyrum villosum	Escape	Plants	Latent Risk
Datura ferox	Escape	Plants	Latent Risk
Datura innoxia	Unknown	Unknown	Latent Risk
Datura metel	Escape	Plants	Latent Risk
Datura stramonium	Escape	Plants	Latent Risk
Delonix regia	Unknown	Unknown	Latent Risk
Deudorix livia (Klug, 1834)	Unknown	Unknown	EDRR Candidates
Didymella fabae G.J. Jellis & Punith (1991)	Unknown	Unknown	EDRR Candidates
Dinoderus minutus	Stowaway	Invertebrates	EDRR Candidates
Disphyma crassifolium	Escape	Plants	EDRR Candidates
Drosanthemum floribundum	Escape	Plants	EDRR Candidates
Duranta erecta	Unknown	Unknown	Latent Risk
Dysphania ambrosioides	Unknown	Unknown	Latent Risk
Dysphania multifida	Unknown	Unknown	EDRR Candidates
Echinochloa oryzoides	Unknown	Unknown	Latent Risk
Echium vulgare	Escape	Plants	Latent Risk
Eclipta prostrata	Escape	Plants	EDRR Candidates
Ehrharta erecta	Escape	Plants	EDRR Candidates
Pontederia crassipes	Escape	Plants	Latent Risk
Elaeagnus angustifolia	Escape	Plants	Latent Risk
Eleusine indica	Escape	Plants	EDRR Candidates
Elodea canadensis	Escape	Plants	Containment (Aquatic)
Enneadesmus forficula	Unknown	Unknown	EDRR Candidates
Enneadesmus trispinosus	Unknown	Unknown	EDRR Candidates
Epinotia algeriensis Chambon, 1990	Unknown	Unknown	EDRR Candidates
Epinotia cedricida Diakonoff, 1969	Unknown	Unknown	EDRR Candidates
Eragrostis curvula	Escape	Plants	EDRR Candidates
Erigeron bonariensis	Unknown	Unknown	EDRR Candidates
Erigeron canadensis	Escape	Plants	EDRR Candidates
Erigeron karvinskianus	Escape	Plants	EDRR Candidates
Erigeron sumatrensis	Unknown	Unknown	EDRR Candidates
Eriobotrya japonica	Escape	Plants	Latent Risk
Erwinia amylovora	Stowaway	Other	EDRR Candidates
Erysimum cheiri	Escape	Plants	Latent Risk
Erythrina caffra	Unknown	Unknown	Latent Risk
Eschscholzia californica	Escape	Plants	Latent Risk
Esox lucius Linnaeus, 1758	Unknown	Unknown	Containment (Aquatic)
Esox masquinongy Mitchill, 1824	Unknown	Unknown	EDRR Candidates
Etrumeus golanii DiBattista, Randall & Bowen, 2012	Stowaway	Unknown	Containment (Aquatic)
Eucalyptus camaldulensis	Escape	Plants	Latent Risk
Eucalyptus globulus	Escape	Plants	Latent Risk
Eucalyptus gomphocephala	Unknown	Unknown	Latent Risk
Eucalyptus leucoxylon	Unknown	Unknown	Latent Risk
Eucalyptus torquata	Unknown	Unknown	Latent Risk
Eudendrium carneum Clarke, 1882	Stowaway	Unknown	Containment (Aquatic)
Eudendrium merulum Watson, 1985	Stowaway	Unknown	Containment (Aquatic)
Euonymus fortunei	Escape	Plants	Latent Risk
Euonymus japonicus	Escape	Plants	Latent Risk
Euphorbia heterophylla	Unknown	Unknown	Latent Risk
Euphorbia hypericifolia	Unknown	Unknown	Latent Risk
Euphorbia hyssopifolia	Unknown	Unknown	Latent Risk
Euphorbia maculata	Unknown	Unknown	Latent Risk
Euphorbia nutans	Unknown	Unknown	Latent Risk
Euphorbia prostrata	Unknown	Unknown	Latent Risk
Euphorbia pulcherrima	Unknown	Unknown	Latent Risk
Euphorbia serpens	Unknown	Unknown	Latent Risk
Eupogonius tomentosus	Unknown	Unknown	EDRR Candidates
Eutetranychus orientalis (Klein, 1936)	Unknown	Unknown	EDRR Candidates
Favorinus ghanensis Edmunds, 1968	Stowaway	Unknown	Containment (Aquatic)
Faxonius limosus (Rafinesque, 1817)	Unknown	Unknown	Containment (Aquatic)
Ficus benjamina	Escape	Plants	Latent Risk
Ficus carica	Escape	Plants	Containment (Terrestrial)
Ficus elastica	Unknown	Unknown	Latent Risk
Ficus microcarpa	Escape	Plants	Latent Risk
Ficus retusa	Unknown	Unknown	Latent Risk
Fistularia commersonii Rüppell, 1838	Stowaway	Unknown	Containment (Aquatic)
Frankliniella occidentalis (Pergande, 1895)	Unknown	Unknown	EDRR Candidates
Fundulus heteroclitus (Linnaeus, 1766)	Stowaway	Unknown	Containment (Aquatic)
Galenia secunda	Unknown	Unknown	Latent Risk
Galinsoga parviflora	Escape	Plants	Latent Risk
Galinsoga quadriradiata	Unknown	Unknown	EDRR Candidates
Gambusia affinis (Baird & Girard, 1853)	Unknown	Unknown	Containment (Aquatic)
Gambusia holbrooki Girard, 1859	Unknown	Unknown	Containment (Aquatic)
Gazania rigens	Escape	Plants	Latent Risk
Glycaspis brimblecombei Moore, 1964	Unknown	Unknown	EDRR Candidates
Gobio gobio (Linnaeus, 1758)	Unknown	Unknown	Containment (Aquatic)
Godiva quadricolor (Barnard, 1927)	Stowaway	Unknown	Containment (Aquatic)
Gomphocarpus fruticosus	Escape	Plants	EDRR Candidates
Greenidea (Greenidea) ficicola Takahashi, 1921	Unknown	Unknown	EDRR Candidates
Gypsophila elegans	Escape	Plants	Latent Risk
Gypsophila pilosa	Escape	Plants	Latent Risk
Hedera canariensis	Unknown	Unknown	Latent Risk
Hedera helix	Escape	Plants	EDRR Candidates
Helianthus annuus	Escape	Plants	EDRR Candidates
Helicoverpa armigera (Hübner, 1808)	Unknown	Unknown	EDRR Candidates
Heliotropium curassavicum	Escape	Plants	EDRR Candidates
Hemiramphus far (Forsskål, 1775)	Stowaway	Unknown	Containment (Aquatic)
Hermetia illucens (Linnaeus, 1758)	Unknown	Unknown	EDRR Candidates
Hibiscus rosa-sinensis	Escape	Plants	Latent Risk
Hucho hucho (Linnaeus, 1758)	Unknown	Unknown	Containment (Aquatic)
Hydrangea macrophylla	Escape	Plants	Latent Risk
Hylurgus micklitzi	Unknown	Unknown	EDRR Candidates
Hypoborus ficus	Unknown	Unknown	EDRR Candidates
Hypophthalmichthys molitrix (Valenciennes, 1844)	Unknown	Unknown	Containment (Aquatic)
Hypoponera punctatissima Forel, 1890	Unknown	Unknown	EDRR Candidates
Ibicella lutea	Stowaway	Plants	Latent Risk
Icerya purchasi Maskell, 1878	Unknown	Unknown	EDRR Candidates
Ipomoea batatas	Escape	Plants	Latent Risk
Ipomoea indica	Escape	Plants	Latent Risk
Ipomoea purpurea	Escape	Plants	Latent Risk
Ipomoea triloba	Unknown	Unknown	Latent Risk
Iris albicans	Escape	Plants	EDRR Candidates
Iris lutescens	Escape	Plants	EDRR Candidates
Isatis tinctoria	Escape	Plants	Latent Risk
Jacaranda mimosifolia	Escape	Plants	Latent Risk
Jatropha integerrima	Unknown	Unknown	Latent Risk
Juglans regia	Escape	Plants	Latent Risk
Kalanchoe daigremontiana	Escape	Escape	Latent Risk
Laccaria fraterna (Sacc.) Pegler 1965	Unknown	Unknown	EDRR Candidates
Lactarius blennius (Fr.) Fr. 1838	Unknown	Unknown	EDRR Candidates
Lagunaria patersonia	Unknown	Unknown	Latent Risk
Lampranthus multiradiatus	Escape	Plants	EDRR Candidates
Lantana camara	Escape	Plants	Latent Risk
Lates niloticus (Linnaeus, 1758)	Unknown	Unknown	Containment (Aquatic)
Laticorophium baconi (Shoemaker, 1934)	Stowaway	Unknown	Containment (Aquatic)
Lemna minuta	Escape	Plants	Latent Risk
Lepidium didymum	Unknown	Unknown	Latent Risk
Lepidium perfoliatum	Escape	Plants	Latent Risk
Lepidium ruderale	Escape	Plants	Latent Risk
Lepidium sativum	Escape	Plants	Latent Risk
Lepomis cyanellus Rafinesque, 1819	Unknown	Unknown	Containment (Aquatic)
Lepomis gibbosus (Linnaeus, 1758)	Unknown	Unknown	Containment (Aquatic)
Lepomis macrochirus Rafinesque, 1819	Unknown	Unknown	Containment (Aquatic)
Lepomis microlophus (Günther, 1859)	Unknown	Unknown	Containment (Aquatic)
Leptocybe invasa Fisher & La Salle, 2004	Unknown	Unknown	EDRR Candidates
Leptoglossus occidentalis Heidemann, 1910	Unknown	Unknown	EDRR Candidates
Leucaena leucocephala	Escape	Plants	Latent Risk
Leucaspis pusilla Löw, 1883	Unknown	Unknown	EDRR Candidates
Ligustrum lucidum	Escape	Plants	Latent Risk
Ligustrum ovalifolium	Escape	Plants	Latent Risk
Limothrips cerealium (Haliday, 1836)	Unknown	Unknown	EDRR Candidates
Linepithema humile (Mayr, 1868)	Unknown	Unknown	EDRR Candidates
Linum usitatissimum	Escape	Plants	EDRR Candidates
Lioponera longitarsus Mayr, 1879	Unknown	Unknown	EDRR Candidates
Lupinus albus	Escape	Plants	EDRR Candidates
Lupinus luteus	Escape	Plants	EDRR Candidates
Lycianthes rantonnetii	Unknown	Unknown	Latent Risk
Lycium ferocissimum	Escape	Plants	Latent Risk
Lyctus africanus	Stowaway	Invertebrates	EDRR Candidates
Lyrodus pedicellatus (Quatrefages, 1849)	Stowaway	Unknown	Containment (Aquatic)
Magallana angulata (Lamarck, 1819)	Stowaway	Unknown	Containment (Aquatic)
Magallana gigas (Thunberg, 1793)	Stowaway	Unknown	Containment (Aquatic)
Malvastrum coromandelianum	Unknown	Unknown	EDRR Candidates
Medicago arborea	Escape	Plants	EDRR Candidates
Medicago falcata	Escape	Plants	EDRR Candidates
Medicago rotata	Unknown	Unknown	EDRR Candidates
Megastigmus pinsapinis Hoffmeyer, 1931	Unknown	Unknown	EDRR Candidates
Melanophila marmottani	Unknown	Unknown	EDRR Candidates
Melia azedarach	Escape	Plants	Latent Risk
Melilotus albus	Escape	Plants	EDRR Candidates
Melilotus officinalis	Escape	Plants	EDRR Candidates
Merhippolyte ancistrota Crosnier & Forest, 1973	Stowaway	Unknown	Containment (Aquatic)
Mesembryanthemum cordifolium	Escape	Escape	EDRR Candidates
Microcosmus squamiger Michaelsen, 1927	Stowaway	Unknown	Containment (Aquatic)
Micropterus dolomieu Lacepède, 1802	Unknown	Unknown	Containment (Aquatic)
Micropterus salmoides (Lacepède, 1802)	Unknown	Unknown	Containment (Aquatic)
Mirabilis jalapa	Escape	Plants	Latent Risk
Mizuhopecten yessoensis (J. C. Jay, 1857)	Stowaway	Unknown	Containment (Aquatic)
Mnemiopsis leidyi A. Agassiz, 1865	Stowaway	Unknown	Containment (Aquatic)
Modiola caroliniana	Escape	Plants	EDRR Candidates
Moluccella laevis	Unknown	Unknown	EDRR Candidates
Monomorium monomorium Bolton, 1987	Unknown	Unknown	EDRR Candidates
Monomorium pharaonis (Linnaeus, 1758)	Unknown	Unknown	EDRR Candidates
Morus alba	Escape	Plants	Latent Risk
Morus nigra	Escape	Plants	Latent Risk
Mustela nivalis Linnaeus, 1766	Unknown	Unknown	EDRR Candidates
Mya arenaria Linnaeus, 1758	Stowaway	Unknown	Containment (Aquatic)
Mylopharyngodon piceus (Richardson, 1846)	Unknown	Unknown	Containment (Aquatic)
Myoporum insulare	Escape	Plants	Latent Risk
Myoporum laetum	Escape	Plants	Latent Risk
Myoporum tenuifolium	Escape	Plants	Latent Risk
Nassella tenuissima	Stowaway	Plants	Latent Risk
Nicotiana glauca	Escape	Plants	Containment (Terrestrial)
Nicotiana rustica	Escape	Plants	Latent Risk
Nothoscordum borbonicum	Escape	Plants	EDRR Candidates
Nylanderia jaegerskioeldi (Mayr, 1904)	Unknown	Unknown	EDRR Candidates
Oenothera biennis	Escape	Plants	Latent Risk
Oenothera indecora	Escape	Plants	Latent Risk
Oenothera stricta	Escape	Plants	Latent Risk
Ommatissus lybicus de Bergevin, 1930	Unknown	Unknown	EDRR Candidates
Oncorhynchus clarkii (Richardson, 1836)	Unknown	Unknown	EDRR Candidates
Oncorhynchus mykiss (Walbaum, 1792)	Stowaway	Unknown	Containment (Aquatic)
Onobrychis viciifolia	Escape	Plants	EDRR Candidates
Ooencyrtus kuvanae (Howard, 1910)	Unknown	Unknown	EDRR Candidates
Ophelimus maskelli (Ashmead, 1900)	Unknown	Unknown	EDRR Candidates
Opogona sacchari (Bojer, 1856)	Unknown	Unknown	EDRR Candidates
Opuntia elatior	Unknown	Unknown	Latent Risk
Opuntia engelmannii	Escape	Plants	Latent Risk
Opuntia ficus-indica	Escape	Plants	Latent Risk
Opuntia maxima	Escape	Plants	Latent Risk
Opuntia microdasys	Unknown	Unknown	Latent Risk
Opuntia robusta	Escape	Plants	Latent Risk
Opuntia stricta	Escape	Plants	Latent Risk
Oreochromis niloticus (Linnaeus, 1758)	Unknown	Unknown	Containment (Aquatic)
Origanum majorana	Escape	Plants	Latent Risk
Orthotomicus longicollis	Unknown	Unknown	EDRR Candidates
Oryctes agamemnon	Unknown	Unknown	EDRR Candidates
Osteospermum ecklonis	Unknown	Unknown	Latent Risk
Oxalis articulata	Escape	Plants	Latent Risk
Oxalis corniculata	Escape	Plants	Latent Risk
Oxalis debilis	Escape	Plants	Latent Risk
Oxalis floribunda	Unknown	Unknown	Latent Risk
Oxalis hirta	Unknown	Unknown	Latent Risk
Oxalis latifolia	Escape	Plants	Latent Risk
Oxalis pes-caprae	Escape	Plants	Containment (Terrestrial)
Oxalis purpurea	Unknown	Unknown	Latent Risk
Oxyura jamaicensis (J. F. Gmelin, 1789)	Unknown	Unknown	Containment (Aquatic)
Panicum antidotale	Stowaway	Plants	EDRR Candidates
Panicum capillare	Escape	Plants	EDRR Candidates
Panicum miliaceum	Escape	Plants	EDRR Candidates
Paracerceis sculpta (Holmes, 1904)	Stowaway	Unknown	Containment (Aquatic)
Paraleucilla magna Klautau, Monteiro & Borojevic, 2004	Stowaway	Unknown	Containment (Aquatic)
Paraserianthes lophantha	Escape	Plants	Latent Risk
Paratrechina longicornis (Latreille, 1802)	Unknown	Unknown	EDRR Candidates
Parkinsonia aculeata	Escape	Plants	Latent Risk
Paspalum dilatatum	Escape	Plants	EDRR Candidates
Paspalum distichum	Unknown	Unknown	EDRR Candidates
Paspalum vaginatum	Escape	Plants	EDRR Candidates
Pelargonium roseum	Unknown	Unknown	Latent Risk
Penaeus japonicus Spence Bate, 1888	Stowaway	Unknown	Containment (Aquatic)
Pennisetum clandestinum	Escape	Plants	EDRR Candidates
Pennisetum purpureum	Escape	Plants	EDRR Candidates
Pennisetum villosum	Escape	Plants	EDRR Candidates
Perca fluviatilis Linnaeus, 1758	Unknown	Unknown	Containment (Aquatic)
Percnon gibbesi (H. Milne Edwards, 1853)	Stowaway	Unknown	Containment (Aquatic)
Petunia axillaris	Unknown	Unknown	Latent Risk
Petunia integrifolia	Escape	Plants	Latent Risk
Pezothrips kellyanus (Bagnall, 1916)	Unknown	Unknown	EDRR Candidates
Phasianus colchicus Linnaeus, 1758	Unknown	Unknown	EDRR Candidates
Pheidole indica Mayr, 1879	Unknown	Unknown	EDRR Candidates
Pheidole megacephala (Fabricius, 1793)	Unknown	Unknown	EDRR Candidates
Phenacoccus madeirensis Green, 1923	Unknown	Unknown	EDRR Candidates
Phlebotomus (Paraphlebotomus) kazeruni Theodor and Mesghali, 1964]	Unknown	Unknown	EDRR Candidates
Phloeosinus cedri	Unknown	Unknown	EDRR Candidates
Phoenix canariensis	Escape	Plants	Latent Risk
Phoenix dactylifera	Escape	Plants	Latent Risk
Phoenix reclinata	Unknown	Unknown	Latent Risk
Pholcus phalangioides (Fuesslin, 1775)	Unknown	Unknown	EDRR Candidates
Phoracantha recurva	Stowaway	Invertebrates	EDRR Candidates
Phoracantha semipunctata	Stowaway	Invertebrates	EDRR Candidates
Phoxinus phoxinus (Linnaeus, 1758)	Unknown	Unknown	Containment (Aquatic)
Phyllanthus tenellus	Escape	Plants	Latent Risk
Phyllocnistis citrella Stainton, 1856	Unknown	Unknown	EDRR Candidates
Phyllorhiza punctata von Lendenfeld, 1884	Stowaway	Unknown	Containment (Aquatic)
Physalia physalis (Linnaeus, 1758)	Stowaway	Unknown	Containment (Aquatic)
Physalis ixocarpa	Escape	Plants	Latent Risk
Physalis philadelphica	Escape	Plants	Latent Risk
Physalis pubescens	Escape	Plants	Latent Risk
Physella acuta (Draparnaud, 1805)	Unknown	Unknown	Containment (Aquatic)
Phytolacca americana	Escape	Plants	Latent Risk
Phytolacca dioica	Escape	Plants	Latent Risk
Pimpinella anisum	Escape	Plants	Latent Risk
Pinus canariensis	Escape	Plants	Latent Risk
Pinus pinea	Escape	Plants	Latent Risk
Pisolithus albus (Cooke & Massee) Priest	Unknown	Unknown	EDRR Candidates
Pisolithus microcarpus (Cooke & Massee) G. Cunn.	Unknown	Unknown	EDRR Candidates
Pistacia vera	Escape	Plants	Latent Risk
Pistia stratiotes	Escape	Plants	Latent Risk
Pittosporum tobira	Escape	Plants	Latent Risk
Pittosporum undulatum	Escape	Plants	Latent Risk
Plagiotrochus amenti Kieffer, 1901	Unknown	Unknown	EDRR Candidates
Planococcus ficus (Signoret, 1875)	Unknown	Unknown	EDRR Candidates
Platanus hispanica	Unknown	Unknown	Latent Risk
Platycladus orientalis	Escape	Plants	Latent Risk
Plectranthus neochilus	Unknown	Unknown	Latent Risk
Plumbago auriculata	Escape	Plants	Latent Risk
Poa pratensis	Release	Plants	Latent Risk
Poecilia reticulata	Escape	Vertebrates	Containment (Aquatic)
Polyandrocarpa zorritensis (Van Name, 1931)	Stowaway	Unknown	Containment (Aquatic)
Polycera hedgpethi Er. Marcus, 1964	Stowaway	Unknown	Containment (Aquatic)
Polycerella emertoni A. E. Verrill, 1880	Stowaway	Unknown	Containment (Aquatic)
Polyphagotarsonemus latus (Banks, 1904)	Unknown	Unknown	EDRR Candidates
Pomoxis annularis	Escape	Vertebrates	EDRR Candidates
Pomoxis nigromaculatus	Escape	Vertebrates	EDRR Candidates
Portulacaria afra	Unknown	Unknown	Latent Risk
Procambarus clarkii (Girard, 1852)	Unknown	Unknown	Containment (Aquatic)
Prosopis juliflora	Escape	Escape	Latent Risk
Prunus armeniaca	Escape	Plants	Latent Risk
Psammodromus hispanicus (Fitzinger, 1826)	Unknown	Unknown	EDRR Candidates
Pseudorasbora parva	Escape	Vertebrates	Containment (Aquatic)
Punica granatum	Escape	Plants	Containment (Terrestrial)
Pyrostegia venusta	Unknown	Unknown	Latent Risk
Rattus norvegicus	Escape	Vertebrates	EDRR Candidates
Reddellomyces donkii (Malençon) Trappe, Castellano & Malajczuk	Unknown	Unknown	EDRR Candidates
Reseda odorata	Escape	Plants	Latent Risk
Reticulitermes grassei Holmgren, 1913	Unknown	Unknown	EDRR Candidates
Rhynchophorus ferrugineus	Stowaway	Invertebrates	EDRR Candidates
Ricinus communis	Escape	Plants	Containment (Terrestrial)
Robinia pseudoacacia	Escape	Plants	EDRR Candidates
Rubia tinctorum	Escape	Plants	Latent Risk
Rugulopteryx okamurae (E.Y.Dawson) I.K.Hwang, W.J.Lee & H.S.Kim, 2009	Stowaway	Unknown	Containment (Aquatic)
Rumex obtusifolius	Escape	Plants	Latent Risk
Ruta graveolens	Escape	Plants	Latent Risk
Rutilus rutilus (Linnaeus, 1758)	Unknown	Unknown	Containment (Aquatic)
Saccharina japonica (Areschoug) C.E.Lane, C.Mayes, Druehl & G.W.Saunders, 2006	Stowaway	Unknown	Containment (Aquatic)
Salix babylonica	Escape	Plants	Latent Risk
Salpichroa origanifolia	Escape	Plants	EDRR Candidates
Salvelinus alpinus (Linnaeus, 1758)	Unknown	Unknown	EDRR Candidates
Salvelinus fontinalis (Mitchill, 1814)	Unknown	Unknown	EDRR Candidates
Salvelinus namaycush (Walbaum, 1792)	Unknown	Unknown	EDRR Candidates
Salvia fruticosa	Unknown	Unknown	Latent Risk
Salvia officinalis	Escape	Plants	Latent Risk
Sambucus nigra	Escape	Plants	EDRR Candidates
Sander lucioperca	Escape	Vertebrates	Containment (Aquatic)
Saponaria officinalis	Escape	Plants	Latent Risk
Sargassum muticum	Escape	Plants	Containment (Aquatic)
Scardinius erythrophthalmus (Linnaeus, 1758)	Unknown	Unknown	Containment (Aquatic)
Schefflera actinophylla	Unknown	Unknown	Latent Risk
Schefflera arboricola	Unknown	Unknown	Latent Risk
Schinus molle	Escape	Plants	Latent Risk
Schinus terebinthifolia	Escape	Escape	Latent Risk
Scleroderma albidum Pat. & Trab., 1899	Unknown	Unknown	EDRR Candidates
Scleroderma bovista Fries (1829)	Unknown	Unknown	EDRR Candidates
Scobicia chevrieri	Unknown	Unknown	EDRR Candidates
Scolytus amygdali	Unknown	Unknown	EDRR Candidates
Scythropus warioni	Unknown	Unknown	EDRR Candidates
Semanotus algiricus	Unknown	Unknown	EDRR Candidates
Senecio angulatus	Escape	Plants	Latent Risk
Senecio santiagoensis	Unknown	Unknown	Latent Risk
Senna bicapsularis	Escape	Plants	Latent Risk
Senna multiglandulosa	Unknown	Unknown	Latent Risk
Setaria palmifolia	Unknown	Unknown	Latent Risk
Setchelliogaster tenuipes (Setch.) Pouzar (1958)	Unknown	Unknown	EDRR Candidates
Sinoxylon muricatum	Unknown	Unknown	EDRR Candidates
Sinoxylon perforans	Unknown	Unknown	EDRR Candidates
Sinoxylon succisum	Unknown	Unknown	EDRR Candidates
Sirex noctilio Fabricius, 1793	Unknown	Unknown	EDRR Candidates
Solandra maxima	Unknown	Unknown	Latent Risk
Solanum abutiloides	Unknown	Unknown	Latent Risk
Solanum americanum	Stowaway	Plants	Latent Risk
Solanum angustifolium	Unknown	Unknown	Latent Risk
Solanum bonariense	Escape	Plants	Latent Risk
Solanum elaeagnifolium	Stowaway	Plants	Containment (Terrestrial)
Solanum laciniatum	Escape	Plants	Latent Risk
Solanum laxum	Unknown	Unknown	Latent Risk
Solanum linnaeanum	Other	Unknown	Latent Risk
Solanum marginatum	Escape	Plants	Latent Risk
Solanum melongena	Escape	Plants	Latent Risk
Solanum rostratum	Unknown	Unknown	Latent Risk
Solanum sisymbriifolium	Escape	Plants	Latent Risk
Solanum triflorum	Escape	Plants	Latent Risk
Soliva stolonifera	Unknown	Unknown	EDRR Candidates
Sorghum virgatum	Unknown	Unknown	EDRR Candidates
Spartina densiflora	Escape	Plants	EDRR Candidates
Sphaeroma walkeri Stebbing, 1905	Stowaway	Unknown	Containment (Aquatic)
Spinacia oleracea	Escape	Plants	Latent Risk
Spodoptera littoralis (Boisduval, 1833)	Unknown	Unknown	EDRR Candidates
Sporobolus indicus	Escape	Plants	EDRR Candidates
Stenotaphrum secundatum	Escape	Plants	EDRR Candidates
Stenothrips graminum Uzel, 1895	Unknown	Unknown	EDRR Candidates
Sternbergia lutea	Escape	Plants	EDRR Candidates
Strumigenys membranifera Emery, 1869	Unknown	Unknown	EDRR Candidates
Strumigenys rogeri Emery, 1890	Unknown	Unknown	EDRR Candidates
Styela plicata (Lesueur, 1823)	Stowaway	Unknown	Containment (Aquatic)
Suillus luteus (L.) Roussel (1796)	Unknown	Unknown	EDRR Candidates
Syagrus romanzoffiana	Unknown	Unknown	Latent Risk
Syllis (Typosyllis) pectinans Haswell, 1920	Unknown	Unknown	EDRR Candidates
Symphyotrichum squamatum	Unknown	Unknown	EDRR Candidates
Tagetes erecta	Escape	Plants	Latent Risk
Tagetes minuta	Escape	Plants	EDRR Candidates
Taphrorychus villifrons	Unknown	Unknown	EDRR Candidates
Tecoma capensis	Escape	Plants	Latent Risk
Tectona grandis	Unknown	Unknown	Latent Risk
Teredo bartschi Clapp, 1923	Stowaway	Unknown	Containment (Aquatic)
Teretrius accaciae	Unknown	Unknown	EDRR Candidates
Teretrius corticalis	Unknown	Unknown	EDRR Candidates
Teretrius kraatzi	Unknown	Unknown	EDRR Candidates
Teretrius pulex	Unknown	Unknown	EDRR Candidates
Tetramorium bicarinatum (Nylander, 1846)	Unknown	Unknown	EDRR Candidates
Tetramorium caldarium (Roger, 1857)	Unknown	Unknown	EDRR Candidates
Tetramorium lanuginosum Mayr, 1870	Unknown	Unknown	EDRR Candidates
Tetranychus evansi Baker & Pritchard, 1960	Unknown	Unknown	EDRR Candidates
Tetranychus turkestani (Ugarov & Nikolskii, 1937)	Unknown	Unknown	EDRR Candidates
Tetranychus urticae Koch, 1836	Unknown	Unknown	EDRR Candidates
Thlaspi arvense	Escape	Plants	Latent Risk
Thymallus thymallus (Linnaeus, 1758)	Unknown	Unknown	EDRR Candidates
Tinca tinca (Linnaeus, 1758)	Unknown	Unknown	Containment (Aquatic)
Tithonia diversifolia	Escape	Escape	Latent Risk
Trachelospermum jasminoides	Escape	Plants	Latent Risk
Tradescantia pallida	Escape	Plants	Latent Risk
Tricellaria inopinata d'Hondt & Occhipinti Ambrogi, 1985	Stowaway	Unknown	Containment (Aquatic)
Trichocorixa verticalis (Fieber, 1851)	Unknown	Unknown	EDRR Candidates
Trichomyrmex destructor (Jerdon, 1851)	Unknown	Unknown	EDRR Candidates
Tridentata marginata (Kirchenpauer, 1864)	Stowaway	Unknown	Containment (Aquatic)
Trifolium alexandrinum	Escape	Plants	EDRR Candidates
Trifolium incarnatum	Escape	Plants	EDRR Candidates
Triglochin striata	Escape	Plants	Latent Risk
Trigonella foenum-graecum	Escape	Plants	EDRR Candidates
Trogoderma granarium	Stowaway	Invertebrates	EDRR Candidates
Tropaeolum majus	Escape	Plants	Latent Risk
Tuta absoluta (Meyrick, 1917)	Unknown	Unknown	EDRR Candidates
Vachellia karroo	Other	Unknown	Latent Risk
Verbesina encelioides	Escape	Plants	Containment (Terrestrial)
Veronica persica	Escape	Plants	Latent Risk
Vespa velutina Lepeletier, 1836	Unknown	Unknown	EDRR Candidates
Vicia ervilia	Escape	Plants	Latent Risk
Vicia faba	Escape	Plants	Latent Risk
Vicia pannonica	Escape	Plants	EDRR Candidates
Waltheria indica	Unknown	Unknown	Latent Risk
Washingtonia filifera	Escape	Plants	Latent Risk
Washingtonia robusta	Escape	Plants	Latent Risk
Xanthium orientale	Escape	Plants	EDRR Candidates
Xanthium spinosum	Escape	Plants	Containment (Terrestrial)
Xyleborinus saxesenii	Unknown	Unknown	EDRR Candidates
Xylomedes coronata	Unknown	Unknown	EDRR Candidates
Yucca aloifolia	Escape	Plants	Latent Risk
Yucca gigantea	Other	Unknown	Latent Risk
Yucca gloriosa	Escape	Plants	Latent Risk
Zantedeschia aethiopica	Escape	Plants	EDRR Candidates
Ziziphus jujuba	Escape	Plants	Latent Risk

## Sheet: 2_Economic_Costs
Scientific_Name	Management_Tier	n_Cost_Entries	Mean_Annual_Cost_USD	Total_Cumulative_Cost_USD	First_Year	Last_Year
Aedes aegypti (Linnaeus, 1762)	EDRR Candidates	544	8.27997e+08	2.89799e+10	1970	2018
Cydia pomonella (Linnaeus, 1758)	EDRR Candidates	4	4.44255e+08	8.8851e+08	2005	2006
Ceratitis capitata (Wiedemann, 1824)	EDRR Candidates	8	3.62382e+08	1.81191e+09	1980	2004
Bemisia tabaci (Gennadius, 1889)	EDRR Candidates	16	1.51211e+08	1.81453e+09	1991	2006
Acacia mearnsii	Latent Risk	65	1.3577e+08	2.17232e+09	1995	2013
Frankliniella occidentalis (Pergande, 1895)	EDRR Candidates	1	9.65027e+07	9.65027e+07	2006	2006
Pontederia crassipes	Containment (Aquatic)	286	6.87899e+07	4.60892e+09	1974	2040
Tuta absoluta (Meyrick, 1917)	EDRR Candidates	23	6.66353e+07	4.66447e+08	2009	2020
Aedes albopictus (Skuse, 1895)	EDRR Candidates	53	1.87713e+07	2.44027e+08	2001	2018
Bactrocera cucurbitae (Coquillett, 1899)	EDRR Candidates	25	1.78496e+07	2.67744e+08	1979	1993
Cyprinus carpio Linnaeus, 1758	Containment (Aquatic)	25	1.43297e+07	2.14945e+08	1962	2017
Melia azedarach	Latent Risk	50	6.52217e+06	1.5001e+08	1995	2017
Cryptotermes brevis (Walker, 1853)	EDRR Candidates	22	5.76493e+06	1.26828e+08	1966	2020
Rattus norvegicus	EDRR Candidates	37	5.15559e+06	8.24895e+07	1986	2018
Elodea canadensis	Containment (Aquatic)	15	5.1027e+06	3.06162e+07	2009	2014
Lantana camara	Latent Risk	213	5.00566e+06	5.25594e+08	1914	2018
Erwinia amylovora	EDRR Candidates	15	3.64354e+06	5.4653e+07	1989	2003
Bactrocera dorsalis (Hendel, 1912)	EDRR Candidates	42	3.02727e+06	6.65999e+07	1968	2017
Rhynchophorus ferrugineus	EDRR Candidates	26	2.21046e+06	4.42091e+07	1997	2018
Schinus terebinthifolia	Latent Risk	9	1.9443e+06	1.55544e+07	2009	2018
Corbicula fluminea (O. F. Müller, 1774)	Containment (Aquatic)	15	1.74234e+06	1.39387e+07	1980	2019
Prosopis juliflora	Latent Risk	20	1.48498e+06	1.03948e+07	2009	2018
Oxyura jamaicensis (J. F. Gmelin, 1789)	Containment (Aquatic)	48	1.1481e+06	2.87025e+07	1991	2015
Buddleja davidii	Latent Risk	3	878294	1.75659e+06	2009	2010
Vespa velutina Lepeletier, 1836	EDRR Candidates	116	812642	1.21896e+07	2006	2020
Acacia saligna	Containment (Terrestrial)	21	759830	1.29171e+07	1995	2014
Phasianus colchicus Linnaeus, 1758	EDRR Candidates	11	713438	4.99407e+06	1978	2018
Sirex noctilio Fabricius, 1793	EDRR Candidates	69	451787	2.84626e+07	1952	2014
Procambarus clarkii (Girard, 1852)	Containment (Aquatic)	69	446272	6.69408e+06	2004	2018
Phoxinus phoxinus (Linnaeus, 1758)	Containment (Aquatic)	3	403365	1.2101e+06	1999	2005
Azolla filiculoides	Containment (Aquatic)	81	338091	8.11418e+06	1995	2018
Acacia cyclops	EDRR Candidates	94	306175	7.34819e+06	1995	2018
Linepithema humile (Mayr, 1868)	EDRR Candidates	98	286106	5.72211e+06	2001	2020
Trogoderma granarium	EDRR Candidates	8	256712	2.0537e+06	1986	2017
Parkinsonia aculeata	Latent Risk	20	126769	2.15507e+06	1983	2017
Tinca tinca (Linnaeus, 1758)	Containment (Aquatic)	1	125370	125370	2013	2013
Ricinus communis	Containment (Terrestrial)	44	116183	2.55603e+06	1997	2018
Acacia longifolia	Latent Risk	17	108723	1.52212e+06	2001	2014
Pseudorasbora parva	Containment (Aquatic)	11	102204	817635	2005	2018
Pheidole megacephala (Fabricius, 1793)	EDRR Candidates	36	97091.1	1.55346e+06	2006	2021
Micropterus salmoides (Lacepède, 1802)	Containment (Aquatic)	30	81448.8	488693	2010	2018
Carpobrotus edulis	Latent Risk	86	73574.7	735747	2009	2018
Magallana gigas (Thunberg, 1793)	Containment (Aquatic)	1	71639.8	71639.8	2013	2013
Arundo donax	Containment (Terrestrial)	218	69626.1	1.67103e+06	1995	2018
Acacia melanoxylon	EDRR Candidates	23	65133.7	1.36781e+06	1995	2017
Argemone mexicana	Latent Risk	20	63529.2	1.27058e+06	1997	2016
Salix babylonica	Latent Risk	20	60023.9	1.20048e+06	1995	2017
Cortaderia selloana	EDRR Candidates	131	59621.8	1.31168e+06	1999	2020
Echium vulgare	Latent Risk	4	35369.4	106108	2008	2010
Ailanthus altissima	EDRR Candidates	219	35111.9	772461	1999	2020
Pistia stratiotes	Containment (Aquatic)	5	31629.4	158147	1978	1982
Monomorium pharaonis (Linnaeus, 1758)	EDRR Candidates	1	31118.1	31118.1	1965	1965
Asparagus asparagoides	EDRR Candidates	15	31098.4	466475	1990	2004
Opuntia ficus-indica	Latent Risk	81	31054.4	341598	2008	2018
Agave sisalana	EDRR Candidates	24	26916.3	565242	1997	2017
Callinectes sapidus Rathbun, 1896	Containment (Aquatic)	1	20750.3	20750.3	2018	2018
Robinia pseudoacacia	EDRR Candidates	101	20048.3	260628	2008	2020
Tithonia diversifolia	Latent Risk	20	18746.3	374927	1997	2016
Acacia dealbata	Latent Risk	3	18612.7	18612.7	2018	2018
Acer negundo	Latent Risk	1	18167	18167	2013	2013
Eucalyptus globulus	Latent Risk	9	17170	137360	2008	2017
Sargassum muticum	Containment (Aquatic)	6	16326.4	65305.7	2010	2013
Opuntia stricta	Latent Risk	42	15140.3	333087	1997	2018
Lepomis macrochirus Rafinesque, 1819	Containment (Aquatic)	8	14648	73239.9	2014	2018
Leucaena leucocephala	Latent Risk	58	13890.9	305599	1997	2018
Oenothera biennis	Latent Risk	22	13752.7	123774	2008	2018
Poecilia reticulata	Containment (Aquatic)	2	8543.88	17087.8	2015	2016
Oncorhynchus mykiss (Walbaum, 1792)	Containment (Aquatic)	2	7936.05	15872.1	2016	2017
Agave americana	Containment (Terrestrial)	135	7399.5	162789	1997	2018
Dactylopius opuntiae (Cockerell, 1896)	EDRR Candidates	1	7235.08	7235.08	2016	2016
Sander lucioperca	Containment (Aquatic)	4	7215.03	21645.1	2015	2017
Lepomis gibbosus (Linnaeus, 1758)	Containment (Aquatic)	12	5938.24	29691.2	2010	2018
Perca fluviatilis Linnaeus, 1758	Containment (Aquatic)	3	4824.15	14472.4	2015	2017
Fundulus heteroclitus (Linnaeus, 1766)	Containment (Aquatic)	4	4250.29	17001.2	2015	2018
Nicotiana glauca	Containment (Terrestrial)	28	3869.88	30959.1	2010	2018
Paspalum vaginatum	EDRR Candidates	1	3640.4	3640.4	2011	2011
Faxonius limosus (Rafinesque, 1817)	Containment (Aquatic)	5	3535.93	17679.6	2009	2017
Colocasia esculenta	EDRR Candidates	10	3509.88	24569.2	2006	2018
Artemia franciscana (Kellogg, 1906)	Containment (Aquatic)	1	3442.33	3442.33	2015	2015
Ageratina adenophora	EDRR Candidates	11	3347.89	36826.8	1999	2009
Gambusia holbrooki Girard, 1859	Containment (Aquatic)	9	3060.5	9181.51	2010	2018
Aloe vera	EDRR Candidates	8	2253.51	15774.6	2008	2017
Senecio angulatus	Latent Risk	13	2035.74	14250.2	2012	2018
Drosanthemum floribundum	EDRR Candidates	2	1915.98	3831.96	2014	2015
Arctotheca calendula	Containment (Terrestrial)	14	1842.05	25788.7	1999	2018
Paspalum dilatatum	EDRR Candidates	1	1714.59	1714.59	2012	2012
Austrocylindropuntia subulata	Latent Risk	31	1637.65	14738.8	2010	2018
Carassius auratus (Linnaeus, 1758)	Containment (Aquatic)	3	1159.78	1159.78	2010	2010
Cylindropuntia imbricata	Latent Risk	39	1153.13	25368.9	1997	2018
Anredera cordifolia	Latent Risk	14	961.903	6733.32	2009	2018
Myoporum laetum	Latent Risk	24	884.373	6190.61	2010	2018
Yucca aloifolia	Latent Risk	20	835.453	6683.62	2011	2018
Pittosporum tobira	Latent Risk	20	723.515	11576.2	1999	2018
Vachellia karroo	Latent Risk	3	702.566	2107.7	2014	2018
Xanthium spinosum	Containment (Terrestrial)	3	671.977	1343.95	2017	2018
Kalanchoe daigremontiana	Latent Risk	6	659.393	2637.57	2014	2018
Eucalyptus camaldulensis	Latent Risk	3	570.659	1711.98	2013	2017
Morus nigra	Latent Risk	3	556.116	1112.23	2014	2015
Ligustrum lucidum	Latent Risk	5	517.561	1552.68	2006	2013
Xanthium orientale	EDRR Candidates	7	408.561	1634.24	2013	2018
Abutilon theophrasti	EDRR Candidates	5	396.83	1190.49	2010	2017
Yucca gigantea	Latent Risk	1	388.31	388.31	2011	2011
Mesembryanthemum cordifolium	EDRR Candidates	10	330.389	1982.33	2012	2018
Elaeagnus angustifolia	Latent Risk	3	302.141	906.422	2009	2013
Aloe arborescens	Latent Risk	4	286.39	572.78	2011	2012
Washingtonia filifera	Latent Risk	4	266.528	799.583	2014	2017
Mirabilis jalapa	Latent Risk	5	228.737	914.948	2015	2018
Solanum linnaeanum	Latent Risk	4	171.465	514.394	2016	2018
Washingtonia robusta	Latent Risk	5	163.462	326.924	2017	2018
Aloe maculata	Latent Risk	5	134.367	537.469	2013	2017
Phoenix canariensis	Latent Risk	2	83.7747	167.549	2016	2018
Morus alba	Latent Risk	1	65.1157	65.1157	2016	2016
Cupressus sempervirens	Latent Risk	1	43.4105	43.4105	2016	2016
Schinus molle	Latent Risk	1	29.3745	29.3745	2015	2015
Erigeron canadensis	EDRR Candidates	1	17.8875	17.8875	2013	2013

## Sheet: 3_Watch_List
Scientific_Name	family	invasive_elsewhere_griis	invasive_morocco_griis	in_global_impact_database_gisd	number_countries_invasive	high_impact_species	data_sources	is_crop
Acacia baileyana	Leguminosae	Yes	No	No	7	No	iNaturalist; GBIF Morocco; WCVP; GRIIS	FALSE
Acacia dealbata	Leguminosae	Yes	No	Yes	26	Yes	iNaturalist; BIEN; GBIF Morocco; BIEN-native; GRIIS; GISD; GRIIS, GISD	FALSE
Acacia horrida	Leguminosae	Yes	No	No	1	No	El Jammai list; BIEN; BIEN-native; GRIIS	FALSE
Acacia longifolia	Leguminosae	Yes	No	Yes	18	No	El Jammai list; GBIF Morocco; WCVP; GRIIS; GISD; GRIIS, GISD	FALSE
Acacia mearnsii	Leguminosae	Yes	No	Yes	31	Yes	El Jammai list; iNaturalist; GBIF Morocco; WCVP; GRIIS; GISD; GRIIS, GISD	FALSE
Acacia pycnantha	Leguminosae	Yes	No	Yes	4	Yes	El Jammai list; iNaturalist; GBIF Morocco; WCVP; GRIIS; GISD; GRIIS, GISD	FALSE
Acacia retinodes	Leguminosae	Yes	No	Yes	5	No	iNaturalist; BIEN; GBIF Morocco; WCVP; BIEN-native; GRIIS; GISD; GRIIS, GISD	FALSE
Acacia salicina	Leguminosae	Yes	No	No	4	No	iNaturalist; GBIF Morocco; GRIIS	FALSE
Acalypha wilkesiana	Euphorbiaceae	Yes	No	No	4	No	Literature; GBIF Morocco; GRIIS ; Added: Buanani, R., et al. "INVENTORY OF ORNAMENTAL PLANTS AT THE CAMPUS OF IBN TOFAIL UNIVERSITY, KENITRA (MOROCCO)." Plant Archives 20.2 (2020): 1108-1113.	FALSE
Acanthospermum hispidum	Compositae	Yes	No	No	47	No	El Jammai list; BIEN; GBIF Morocco; BIEN-native; GRIIS	FALSE
Acer negundo	Sapindaceae	Yes	No	No	38	No	iNaturalist; GBIF Morocco; WCVP; GRIIS	FALSE
Ageratum conyzoides	Compositae	Yes	No	Yes	98	Yes	El Jammai list; GRIIS; GISD; GRIIS, GISD	FALSE
Ageratum houstonianum	Asteraceae	Yes	No	No	38	No	Literature; GRIIS ; Added: L√©ger, J.-F., Chambouleyron, M., Herment, P.-C., Verloove, F., Chatelain, C., Mombrial, F., Andrieu, F., Homrani Bakali, A., & Tanji, A. (2025). Contribution √† la connaissance de la flore du Maroc, notamment de plantes exog√®nes naturalis√©es. Carnets botaniques, 266. https://doi.org/10.34971/A41W-AC40	FALSE
Albizia julibrissin	Leguminosae	Yes	No	Yes	29	No	iNaturalist; BIEN; GBIF Morocco; BIEN-native; GRIIS; GISD; GRIIS, GISD	FALSE
Alcea rosea	Malvaceae	Yes	No	No	23	No	El Jammai list; iNaturalist; GBIF Morocco; WCVP; GRIIS	FALSE
Allium cepa	Amaryllidaceae	Yes	No	No	33	No	BIEN; GBIF Morocco; WCVP; BIEN-native; GRIIS	FALSE
Allium neapolitanum	Amaryllidaceae	Yes	No	No	7	No	BIEN; GBIF Morocco; WCVP; BIEN-native; GRIIS	FALSE
Allium sativum	Amaryllidaceae	Yes	No	No	24	No	BIEN; GBIF Morocco; WCVP; BIEN-native; GRIIS	FALSE
Aloe arborescens	Xanthorrhoeaceae	Yes	No	No	9	No	iNaturalist; BIEN; GBIF Morocco; WCVP; BIEN-native; GRIIS	FALSE
Aloe maculata	Xanthorrhoeaceae	Yes	No	No	5	No	iNaturalist; GBIF Morocco; GRIIS	FALSE
Amaranthus cruentus	Amaranthaceae	Yes	No	No	39	No	iNaturalist; BIEN; GBIF Morocco; WCVP; BIEN-native; GRIIS	FALSE
Amaranthus palmeri	Amaranthaceae	Yes	No	No	13	No	Literature; GBIF Morocco; GRIIS ; Added: Tanji, A. (2023). Two new annual weeds in Morocco: Amaranthus palmeri and Chenopodium ficifolium subsp. ficifolium (Amaranthaceae) Abstract. Flora Mediterranea, 33.	FALSE
Amaranthus spinosus	Amaranthaceae	Yes	No	No	72	Yes	Literature; GRIIS ; Added: Sukhorukov, A. P., L‚àö¬©ger, J. F., & Chambouleyron, M. (2023). Two new species alien to the flora of Morocco: Amaranthus spinosus (Amaranthaceae) and Cardamine occulta (Brassicaceae). Flora Mediterranea, 33, 31-38.	FALSE
Ambrosia psilostachya	Compositae	Yes	No	No	11	No	Literature; GRIIS ; Added: Tanji, A. (2023). Two new weeds in Morocco: Ambrosia psilostachya (Asteraceae) and Datura ferox (Solanaceae). Flora Mediterranea, 33.	FALSE
Anredera cordifolia	Basellaceae	Yes	No	Yes	37	No	El Jammai list; GBIF Morocco; WCVP; GRIIS; GISD; GRIIS, GISD	FALSE
Antirrhinum majus	Plantaginaceae	Yes	No	No	26	No	BIEN; GBIF Morocco; WCVP; BIEN-native; GRIIS	FALSE
Argemone mexicana	Papaveraceae	Yes	No	No	83	Yes	El Jammai list; WCVP; GRIIS	FALSE
Asparagus aethiopicus	Asparagaceae	Yes	No	No	7	No	Literature; iNaturalist; GRIIS ; Added: Buanani, R., et al. "INVENTORY OF ORNAMENTAL PLANTS AT THE CAMPUS OF IBN TOFAIL UNIVERSITY, KENITRA (MOROCCO)." Plant Archives 20.2 (2020): 1108-1113.	FALSE
Asparagus officinalis	Asparagaceae	Yes	No	Yes	24	No	BIEN; GBIF Morocco; WCVP; BIEN-native; GRIIS; GISD; GRIIS, GISD	FALSE
Aster subulatus	Compositae	Yes	No	No	3	No	El Jammai list; iNaturalist; GRIIS	FALSE
Austrocylindropuntia cylindrica	Cactaceae	Yes	No	No	5	No	El Jammai list; iNaturalist; GBIF Morocco; WCVP; GRIIS	FALSE
Austrocylindropuntia subulata	Cactaceae	Yes	No	No	14	No	El Jammai list; iNaturalist; BIEN; GBIF Morocco; WCVP; BIEN-native; GRIIS	FALSE
Avena byzantina	Poaceae	Yes	No	No	3	No	BIEN; GBIF Morocco; WCVP; BIEN-native; GRIIS	FALSE
Bambusa multiplex	Poaceae	Yes	No	No	11	No	iNaturalist; GRIIS	FALSE
Bauhinia purpurea	Leguminosae	Yes	No	No	25	No	iNaturalist; GRIIS	FALSE
Bauhinia variegata	Leguminosae	Yes	No	No	26	No	iNaturalist; GBIF Morocco; GRIIS	FALSE
Bidens frondosa	Compositae	Yes	No	No	33	No	BIEN; GBIF Morocco; WCVP; BIEN-native; GRIIS	FALSE
Bougainvillea buttiana	NA	Yes	No	No	1	No	Literature; GRIIS ; Added: Buanani, R., et al. "INVENTORY OF ORNAMENTAL PLANTS AT THE CAMPUS OF IBN TOFAIL UNIVERSITY, KENITRA (MOROCCO)." Plant Archives 20.2 (2020): 1108-1113.	FALSE
Bougainvillea glabra	Nyctaginaceae	Yes	No	No	15	No	Literature; BIEN; GBIF Morocco; BIEN-native; GRIIS ; Added: Buanani, R., et al. "INVENTORY OF ORNAMENTAL PLANTS AT THE CAMPUS OF IBN TOFAIL UNIVERSITY, KENITRA (MOROCCO)." Plant Archives 20.2 (2020): 1108-1113.	FALSE
Bougainvillea spectabilis	Nyctaginaceae	Yes	No	No	19	No	Literature; GBIF Morocco; GRIIS ; Added: Buanani, R., et al. "INVENTORY OF ORNAMENTAL PLANTS AT THE CAMPUS OF IBN TOFAIL UNIVERSITY, KENITRA (MOROCCO)." Plant Archives 20.2 (2020): 1108-1113.	FALSE
Brachychiton populneus	NA	Yes	No	No	5	No	Literature; GRIIS ; Added: Buanani, R., et al. "INVENTORY OF ORNAMENTAL PLANTS AT THE CAMPUS OF IBN TOFAIL UNIVERSITY, KENITRA (MOROCCO)." Plant Archives 20.2 (2020): 1108-1113.	FALSE
Brassica napus	Brassicaceae	Yes	No	No	27	No	BIEN; GBIF Morocco; WCVP; BIEN-native; GRIIS	FALSE
Brassica oleracea	Brassicaceae	Yes	No	No	32	No	BIEN; GBIF Morocco; WCVP; BIEN-native; GRIIS	FALSE
Bryophyllum fedtschenkoi	Crassulaceae	Yes	No	No	8	No	Literature; GRIIS ; Added: Buanani, R., et al. "INVENTORY OF ORNAMENTAL PLANTS AT THE CAMPUS OF IBN TOFAIL UNIVERSITY, KENITRA (MOROCCO)." Plant Archives 20.2 (2020): 1108-1113.	FALSE
Buddleja davidii	Scrophulariaceae	Yes	No	Yes	37	No	iNaturalist; GBIF Morocco; GRIIS; GISD; GRIIS, GISD	FALSE
Caesalpinia gilliesii	Leguminosae	Yes	No	No	12	No	iNaturalist; GBIF Morocco; BIEN-native; GRIIS	FALSE
Caesalpinia spinosa	Leguminosae	Yes	No	No	6	No	BIEN; GBIF Morocco; BIEN-native; GRIIS	FALSE
Callistemon citrinus	Myrtaceae	Yes	No	No	5	No	BIEN; GBIF Morocco; BIEN-native; GRIIS	FALSE
Callistemon viminalis	Myrtaceae	Yes	No	No	4	No	Literature; GBIF Morocco; GRIIS ; Added: Buanani, R., et al. "INVENTORY OF ORNAMENTAL PLANTS AT THE CAMPUS OF IBN TOFAIL UNIVERSITY, KENITRA (MOROCCO)." Plant Archives 20.2 (2020): 1108-1113.	FALSE
Campsis radicans	Bignoniaceae	Yes	No	No	14	No	iNaturalist; BIEN; GBIF Morocco; BIEN-native; GRIIS	FALSE
Canna indica	Cannaceae	Yes	No	Yes	72	Yes	iNaturalist; GRIIS; GISD; GRIIS, GISD	FALSE
Cannabis sativa	Cannabaceae	Yes	No	No	37	No	BIEN; GBIF Morocco; WCVP; BIEN-native; GRIIS	FALSE
Capsicum annuum	Solanaceae	Yes	No	No	39	No	BIEN; GBIF Morocco; WCVP; BIEN-native; GRIIS	FALSE
Cardamine flexuosa	Brassicaceae	Yes	No	Yes	15	No	Literature; GBIF Morocco; GRIIS; GISD; GRIIS, GISD ; Added: Sukhorukov, A. P., L‚àö¬©ger, J. F., & Chambouleyron, M. (2023). Two new species alien to the flora of Morocco: Amaranthus spinosus (Amaranthaceae) and Cardamine occulta (Brassicaceae). Flora Mediterranea, 33, 31-38.	FALSE
Cardiospermum halicacabum	Sapindaceae	Yes	No	No	33	No	Literature; GRIIS ; Added: L√©ger, J.-F., Chambouleyron, M., Herment, P.-C., Verloove, F., Chatelain, C., Mombrial, F., Andrieu, F., Homrani Bakali, A., & Tanji, A. (2025). Contribution √† la connaissance de la flore du Maroc, notamment de plantes exog√®nes naturalis√©es. Carnets botaniques, 266. https://doi.org/10.34971/A41W-AC41	FALSE
Carpobrotus chilensis	Aizoaceae	Yes	No	No	4	No	iNaturalist; GBIF Morocco; GRIIS	FALSE
Carpobrotus edulis	Aizoaceae	Yes	No	Yes	29	No	El Jammai list; iNaturalist; BIEN; GBIF Morocco; WCVP; BIEN-native; GRIIS; GISD; GRIIS, GISD	FALSE
Carthamus tinctorius	Compositae	Yes	No	No	25	No	BIEN; GBIF Morocco; WCVP; BIEN-native; GRIIS	FALSE
Castanea sativa	Fagaceae	Yes	No	No	15	No	BIEN; GBIF Morocco; WCVP; BIEN-native; GRIIS	FALSE
Casuarina cunninghamiana	Casuarinaceae	Yes	No	No	31	No	iNaturalist; GBIF Morocco; WCVP; GRIIS	FALSE
Catharanthus roseus	Apocynaceae	Yes	No	No	94	Yes	Literature; GBIF Morocco; GRIIS ; Added: Buanani, R., et al. "INVENTORY OF ORNAMENTAL PLANTS AT THE CAMPUS OF IBN TOFAIL UNIVERSITY, KENITRA (MOROCCO)." Plant Archives 20.2 (2020): 1108-1113.	FALSE
Ceiba speciosa	Malvaceae	Yes	No	No	2	No	iNaturalist; GRIIS	FALSE
Cephalaria syriaca	Caprifoliaceae	Yes	No	No	7	No	El Jammai list; WCVP; GRIIS	FALSE
Cereus hildmannianus	Cactaceae	Yes	No	No	3	No	Literature; GRIIS ; Added: Buanani, R., et al. "INVENTORY OF ORNAMENTAL PLANTS AT THE CAMPUS OF IBN TOFAIL UNIVERSITY, KENITRA (MOROCCO)." Plant Archives 20.2 (2020): 1108-1113.	FALSE
Cestrum elegans	Solanaceae	Yes	No	No	9	No	BIEN; GBIF Morocco; BIEN-native; GRIIS	FALSE
Chaenomeles speciosa	Rosaceae	Yes	No	No	1	No	iNaturalist; GBIF Morocco; GRIIS	FALSE
Chenopodium ficifolium	Amaranthaceae	Yes	No	No	9	No	Literature; GRIIS ; Added: Tanji, A. (2023). Two new annual weeds in Morocco: Amaranthus palmeri and Chenopodium ficifolium subsp. ficifolium (Amaranthaceae) Abstract. Flora Mediterranea, 33.	FALSE
Chlorophytum comosum	Asparagaceae	Yes	No	No	13	No	Literature; GBIF Morocco; GRIIS ; Added: Buanani, R., et al. "INVENTORY OF ORNAMENTAL PLANTS AT THE CAMPUS OF IBN TOFAIL UNIVERSITY, KENITRA (MOROCCO)." Plant Archives 20.2 (2020): 1108-1113.	FALSE
Chorispora tenella	Brassicaceae	Yes	No	No	17	No	Literature; GBIF Morocco; GRIIS ; Added: Bakali, A. H., L‚àö¬©ger, J. F., & Mombrial, F. (2024). Chorispora tenella (Brassicaceae), alien naturalized in Morocco: comparison with similar-looking species. Flora Mediterranea, 34.	FALSE
Citrus limon	Rutaceae	Yes	No	No	27	No	Literature; BIEN; GBIF Morocco; BIEN-native; GRIIS ; Added: Buanani, R., et al. "INVENTORY OF ORNAMENTAL PLANTS AT THE CAMPUS OF IBN TOFAIL UNIVERSITY, KENITRA (MOROCCO)." Plant Archives 20.2 (2020): 1108-1113.	FALSE
Corymbia ficifolia	Myrtaceae	Yes	No	No	2	No	iNaturalist; GRIIS	FALSE
Cucumis melo	Cucurbitaceae	Yes	No	No	29	No	BIEN; GBIF Morocco; WCVP; BIEN-native; GRIIS	FALSE
Cucurbita maxima	Cucurbitaceae	Yes	No	No	17	No	iNaturalist; BIEN; GBIF Morocco; BIEN-native; GRIIS	FALSE
Cucurbita moschata	Cucurbitaceae	Yes	No	No	11	No	iNaturalist; GBIF Morocco; GRIIS	FALSE
Cuminum cyminum	Apiaceae	Yes	No	No	5	No	BIEN; GBIF Morocco; WCVP; BIEN-native; GRIIS	FALSE
Cupressus arizonica	Cupressaceae	Yes	No	No	10	No	iNaturalist; GBIF Morocco; GRIIS	FALSE
Cupressus sempervirens	Cupressaceae	Yes	No	No	16	No	BIEN; GBIF Morocco; WCVP; BIEN-native; GRIIS	FALSE
Cuscuta australis	Convolvulaceae	Yes	No	No	6	No	El Jammai list; GBIF Morocco; WCVP; GRIIS	FALSE
Cuscuta campestris	Convolvulaceae	Yes	No	No	79	Yes	El Jammai list; iNaturalist; BIEN; GBIF Morocco; WCVP; BIEN-native; GRIIS	FALSE
Cuscuta indecora	Convolvulaceae	Yes	No	No	2	No	BIEN; GBIF Morocco; WCVP; BIEN-native; GRIIS	FALSE
Cuscuta pentagona	Convolvulaceae	Yes	No	No	67	Yes	El Jammai list; GRIIS	FALSE
Cydonia oblonga	Rosaceae	Yes	No	No	19	No	BIEN; GBIF Morocco; WCVP; BIEN-native; GRIIS	FALSE
Cylindropuntia imbricata	Cactaceae	Yes	No	No	8	No	iNaturalist; GBIF Morocco; WCVP; GRIIS	FALSE
Cymbalaria muralis	Plantaginaceae	Yes	No	No	29	No	El Jammai list; iNaturalist; GBIF Morocco; WCVP; GRIIS	FALSE
Cyperus eragrostis	Cyperaceae	Yes	No	No	25	No	Literature; BIEN; GBIF Morocco; BIEN-native; GRIIS ; Added: Khabbach, Abdelmajid, Mohamed Libiad, and Abdeslam Ennabili. "An updated checklist of the wetland vascular flora from Morocco." Moroccan Journal of Biology 17 (2020): 1-35	FALSE
Dasypyrum villosum	Poaceae	Yes	No	No	5	No	BIEN; GBIF Morocco; WCVP; BIEN-native; GRIIS	FALSE
Datura ferox	Solanaceae	Yes	No	No	24	No	Literature; GRIIS ; Added: Tanji, A. (2023). Two new weeds in Morocco: Ambrosia psilostachya (Asteraceae) and Datura ferox (Solanaceae). Flora Mediterranea, 33.	FALSE
Datura innoxia	Solanaceae	Yes	No	No	75	Yes	iNaturalist; GBIF Morocco; WCVP; GRIIS	FALSE
Datura metel	Solanaceae	Yes	No	No	30	No	El Jammai list; GBIF Morocco; WCVP; GRIIS	FALSE
Datura stramonium	Solanaceae	Yes	No	No	103	Yes	El Jammai list; iNaturalist; BIEN; GBIF Morocco; WCVP; BIEN-native; GRIIS	FALSE
Delonix regia	Leguminosae	Yes	No	No	94	Yes	iNaturalist; GBIF Morocco; GRIIS	FALSE
Duranta erecta	Verbenaceae	Yes	No	No	44	No	Literature; iNaturalist; BIEN; GBIF Morocco; BIEN-native; GRIIS ; Added: Buanani, R., et al. "INVENTORY OF ORNAMENTAL PLANTS AT THE CAMPUS OF IBN TOFAIL UNIVERSITY, KENITRA (MOROCCO)." Plant Archives 20.2 (2020): 1108-1113.	FALSE
Dysphania ambrosioides	Amaranthaceae	Yes	No	No	65	Yes	El Jammai list; BIEN; Euro+Med; GRIIS	FALSE
Echinochloa oryzoides	Poaceae	Yes	No	No	16	No	El Jammai list; GRIIS	FALSE
Echium vulgare	Boraginaceae	Yes	No	No	14	No	BIEN; GBIF Morocco; WCVP; BIEN-native; GRIIS	FALSE
Eichhornia crassipes	Pontederiaceae	Yes	No	Yes	119	Yes	Literature; iNaturalist; GBIF Morocco; GRIIS; GISD; GRIIS, GISD ; Added: L√©ger, J.-F., Chambouleyron, M., Herment, P.-C., Verloove, F., Chatelain, C., Mombrial, F., Andrieu, F., Homrani Bakali, A., & Tanji, A. (2025). Contribution √† la connaissance de la flore du Maroc, notamment de plantes exog√®nes naturalis√©es. Carnets botaniques, 266. https://doi.org/10.34971/A41W-AC40	FALSE
Elaeagnus angustifolia	Elaeagnaceae	Yes	No	Yes	25	No	El Jammai list; GBIF Morocco; WCVP; GRIIS; GISD; GRIIS, GISD	FALSE
Eriobotrya japonica	Rosaceae	Yes	No	Yes	39	No	Literature; iNaturalist; BIEN; GBIF Morocco; BIEN-native; GRIIS; GISD; GRIIS, GISD ; Added: Buanani, R., et al. "INVENTORY OF ORNAMENTAL PLANTS AT THE CAMPUS OF IBN TOFAIL UNIVERSITY, KENITRA (MOROCCO)." Plant Archives 20.2 (2020): 1108-1113.	FALSE
Erysimum cheiri	Brassicaceae	Yes	No	No	16	No	El Jammai list; Euro+Med; GRIIS	FALSE
Erythrina caffra	Leguminosae	Yes	No	No	2	No	Literature; GBIF Morocco; GRIIS ; Added: Buanani, R., et al. "INVENTORY OF ORNAMENTAL PLANTS AT THE CAMPUS OF IBN TOFAIL UNIVERSITY, KENITRA (MOROCCO)." Plant Archives 20.2 (2020): 1108-1113.	FALSE
Eschscholzia californica	Papaveraceae	Yes	No	No	29	No	iNaturalist; BIEN; GBIF Morocco; WCVP; BIEN-native; GRIIS	FALSE
Eucalyptus camaldulensis	Myrtaceae	Yes	No	No	74	Yes	iNaturalist; GBIF Morocco; WCVP; GRIIS	FALSE
Eucalyptus globulus	Myrtaceae	Yes	No	No	36	No	iNaturalist; BIEN; GBIF Morocco; WCVP; BIEN-native; GRIIS	FALSE
Eucalyptus gomphocephala	Myrtaceae	Yes	No	No	6	No	iNaturalist; BIEN; GBIF Morocco; WCVP; BIEN-native; GRIIS	FALSE
Eucalyptus leucoxylon	Myrtaceae	Yes	No	No	3	No	iNaturalist; GBIF Morocco; GRIIS	FALSE
Eucalyptus torquata	Myrtaceae	Yes	No	No	3	No	BIEN; GBIF Morocco; WCVP; BIEN-native; GRIIS	FALSE
Euonymus fortunei	NA	Yes	No	Yes	5	No	Literature; GRIIS; GISD; GRIIS, GISD ; Added: Buanani, R., et al. "INVENTORY OF ORNAMENTAL PLANTS AT THE CAMPUS OF IBN TOFAIL UNIVERSITY, KENITRA (MOROCCO)." Plant Archives 20.2 (2020): 1108-1113.	FALSE
Euonymus japonicus	Celastraceae	Yes	No	No	11	No	Literature; GBIF Morocco; GRIIS ; Added: Buanani, R., et al. "INVENTORY OF ORNAMENTAL PLANTS AT THE CAMPUS OF IBN TOFAIL UNIVERSITY, KENITRA (MOROCCO)." Plant Archives 20.2 (2020): 1108-1113.	FALSE
Euphorbia heterophylla	Euphorbiaceae	Yes	No	No	71	Yes	El Jammai list; GRIIS	FALSE
Euphorbia hypericifolia	Euphorbiaceae	Yes	No	No	44	No	iNaturalist; GRIIS	FALSE
Euphorbia hyssopifolia	Euphorbiaceae	Yes	No	No	11	No	Literature; GRIIS ; Added: L√©ger, J.-F., Chambouleyron, M., Herment, P.-C., Verloove, F., Chatelain, C., Mombrial, F., Andrieu, F., Homrani Bakali, A., & Tanji, A. (2025). Contribution √† la connaissance de la flore du Maroc, notamment de plantes exog√®nes naturalis√©es. Carnets botaniques, 266. https://doi.org/10.34971/A41W-AC42	FALSE
Euphorbia maculata	Euphorbiaceae	Yes	No	No	36	No	iNaturalist; BIEN; GBIF Morocco; WCVP; BIEN-native; GRIIS	FALSE
Euphorbia nutans	Euphorbiaceae	Yes	No	No	17	No	El Jammai list; BIEN; GBIF Morocco; WCVP; BIEN-native; GRIIS	FALSE
Euphorbia prostrata	Euphorbiaceae	Yes	No	No	67	Yes	iNaturalist; GBIF Morocco; GRIIS	FALSE
Euphorbia pulcherrima	Euphorbiaceae	Yes	No	No	17	No	iNaturalist; GBIF Morocco; GRIIS	FALSE
Euphorbia serpens	Euphorbiaceae	Yes	No	No	19	No	El Jammai list; iNaturalist; BIEN; GBIF Morocco; WCVP; BIEN-native; GRIIS	FALSE
Ficus benjamina	NA	Yes	No	No	26	No	Literature; GRIIS ; Added: Buanani, R., et al. "INVENTORY OF ORNAMENTAL PLANTS AT THE CAMPUS OF IBN TOFAIL UNIVERSITY, KENITRA (MOROCCO)." Plant Archives 20.2 (2020): 1108-1113.	FALSE
Ficus elastica	Moraceae	Yes	No	No	26	No	El Jammai list; BIEN; GBIF Morocco; BIEN-native; GRIIS	FALSE
Ficus microcarpa	Moraceae	Yes	No	No	23	No	iNaturalist; GBIF Morocco; GRIIS	FALSE
Ficus retusa	Moraceae	Yes	No	No	1	No	Literature; GBIF Morocco; GRIIS ; Added: Buanani, R., et al. "INVENTORY OF ORNAMENTAL PLANTS AT THE CAMPUS OF IBN TOFAIL UNIVERSITY, KENITRA (MOROCCO)." Plant Archives 20.2 (2020): 1108-1113.	FALSE
Galenia secunda	Aizoaceae	Yes	No	No	1	No	BIEN; GBIF Morocco; BIEN-native; GRIIS	FALSE
Galinsoga parviflora	Compositae	Yes	No	No	82	Yes	El Jammai list; GBIF Morocco; GRIIS	FALSE
Gazania rigens	Compositae	Yes	No	No	4	No	Literature; GBIF Morocco; GRIIS ; Added: Buanani, R., et al. "INVENTORY OF ORNAMENTAL PLANTS AT THE CAMPUS OF IBN TOFAIL UNIVERSITY, KENITRA (MOROCCO)." Plant Archives 20.2 (2020): 1108-1113.	FALSE
Gypsophila elegans	Caryophyllaceae	Yes	No	No	9	No	El Jammai list; GBIF Morocco; WCVP; GRIIS	FALSE
Gypsophila pilosa	Caryophyllaceae	Yes	No	No	4	No	El Jammai list; GBIF Morocco; WCVP; GRIIS	FALSE
Hedera canariensis	Araliaceae	Yes	No	No	3	No	BIEN; GBIF Morocco; BIEN-native; GRIIS	FALSE
Hibiscus rosa-sinensis	NA	Yes	No	No	28	No	Literature; GBIF Morocco; GRIIS ; Added: Buanani, R., et al. "INVENTORY OF ORNAMENTAL PLANTS AT THE CAMPUS OF IBN TOFAIL UNIVERSITY, KENITRA (MOROCCO)." Plant Archives 20.2 (2020): 1108-1113.	FALSE
Hydrangea macrophylla	Hydrangeaceae	Yes	No	No	19	No	El Jammai list; BIEN; GBIF Morocco; BIEN-native; GRIIS	FALSE
Ibicella lutea	Martyniaceae	Yes	No	No	5	No	El Jammai list; GRIIS	FALSE
Ipomoea batatas	Convolvulaceae	Yes	No	No	44	No	iNaturalist; GBIF Morocco; WCVP; GRIIS	FALSE
Ipomoea indica	Convolvulaceae	Yes	No	No	45	No	Literature; iNaturalist; GBIF Morocco; WCVP; GRIIS ; Added: L√©ger, J.-F., Chambouleyron, M., Herment, P.-C., Verloove, F., Chatelain, C., Mombrial, F., Andrieu, F., Homrani Bakali, A., & Tanji, A. (2025). Contribution √† la connaissance de la flore du Maroc, notamment de plantes exog√®nes naturalis√©es. Carnets botaniques, 266. https://doi.org/10.34971/A41W-AC40	FALSE
Ipomoea purpurea	Convolvulaceae	Yes	No	No	54	Yes	iNaturalist; GBIF Morocco; GRIIS	FALSE
Ipomoea triloba	Convolvulaceae	Yes	No	No	37	No	Literature; GRIIS ; Added: L√©ger, J.-F., Chambouleyron, M., Herment, P.-C., Verloove, F., Chatelain, C., Mombrial, F., Andrieu, F., Homrani Bakali, A., & Tanji, A. (2025). Contribution √† la connaissance de la flore du Maroc, notamment de plantes exog√®nes naturalis√©es. Carnets botaniques, 266. https://doi.org/10.34971/A41W-AC43	FALSE
Isatis tinctoria	Brassicaceae	Yes	No	No	16	No	BIEN; GBIF Morocco; WCVP; BIEN-native; GRIIS	FALSE
Jacaranda mimosifolia	Bignoniaceae	Yes	No	No	32	No	Literature; iNaturalist; GBIF Morocco; GRIIS ; Added: Buanani, R., et al. "INVENTORY OF ORNAMENTAL PLANTS AT THE CAMPUS OF IBN TOFAIL UNIVERSITY, KENITRA (MOROCCO)." Plant Archives 20.2 (2020): 1108-1113.	FALSE
Jatropha integerrima	Euphorbiaceae	Yes	No	No	7	No	iNaturalist; GBIF Morocco; GRIIS	FALSE
Juglans regia	Juglandaceae	Yes	No	No	21	No	BIEN; GBIF Morocco; WCVP; BIEN-native; GRIIS	FALSE
Kalanchoe daigremontiana	Crassulaceae	Yes	No	No	21	No	Literature; GBIF Morocco; WCVP; GRIIS ; Added: Buanani, R., et al. "INVENTORY OF ORNAMENTAL PLANTS AT THE CAMPUS OF IBN TOFAIL UNIVERSITY, KENITRA (MOROCCO)." Plant Archives 20.2 (2020): 1108-1113.	FALSE
Lagunaria patersonia	Malvaceae	Yes	No	No	1	No	BIEN; GBIF Morocco; BIEN-native; GRIIS	FALSE
Lantana camara	Verbenaceae	Yes	No	Yes	123	Yes	El Jammai list; iNaturalist; BIEN; GBIF Morocco; BIEN-native; GRIIS; GISD; GRIIS, GISD	FALSE
Lemna minuta	Araceae	Yes	No	No	20	No	Literature; GRIIS ; Added: L√©ger, J.-F., Chambouleyron, M., Herment, P.-C., Verloove, F., Chatelain, C., Mombrial, F., Andrieu, F., Homrani Bakali, A., & Tanji, A. (2025). Contribution √† la connaissance de la flore du Maroc, notamment de plantes exog√®nes naturalis√©es. Carnets botaniques, 266. https://doi.org/10.34971/A41W-AC44	FALSE
Lepidium didymum	Brassicaceae	Yes	No	No	41	No	El Jammai list; GBIF Morocco; WCVP; GRIIS	FALSE
Lepidium perfoliatum	Brassicaceae	Yes	No	No	15	No	BIEN; GBIF Morocco; WCVP; BIEN-native; GRIIS	FALSE
Lepidium ruderale	Brassicaceae	Yes	No	No	17	No	El Jammai list; WCVP; GRIIS	FALSE
Lepidium sativum	Brassicaceae	Yes	No	No	30	No	BIEN; GBIF Morocco; WCVP; BIEN-native; GRIIS	FALSE
Leucaena leucocephala	Leguminosae	Yes	No	Yes	153	Yes	El Jammai list; iNaturalist; GBIF Morocco; GRIIS; GISD; GRIIS, GISD	FALSE
Ligustrum lucidum	Oleaceae	Yes	No	Yes	23	No	iNaturalist; GRIIS; GISD; GRIIS, GISD	FALSE
Ligustrum ovalifolium	Oleaceae	Yes	No	No	11	No	Literature; GBIF Morocco; GRIIS ; Added: Buanani, R., et al. "INVENTORY OF ORNAMENTAL PLANTS AT THE CAMPUS OF IBN TOFAIL UNIVERSITY, KENITRA (MOROCCO)." Plant Archives 20.2 (2020): 1108-1113.	FALSE
Lycianthes rantonnetii	Solanaceae	Yes	No	No	1	No	iNaturalist; BIEN; GBIF Morocco; BIEN-native; GRIIS	FALSE
Lycium ferocissimum	Solanaceae	Yes	No	No	4	No	El Jammai list; BIEN; GBIF Morocco; WCVP; BIEN-native; GRIIS	FALSE
Melia azedarach	Meliaceae	Yes	No	Yes	118	Yes	Literature; iNaturalist; BIEN; GBIF Morocco; WCVP; BIEN-native; GRIIS; GISD; GRIIS, GISD ; Added: Buanani, R., et al. "INVENTORY OF ORNAMENTAL PLANTS AT THE CAMPUS OF IBN TOFAIL UNIVERSITY, KENITRA (MOROCCO)." Plant Archives 20.2 (2020): 1108-1113.	FALSE
Mirabilis jalapa	Nyctaginaceae	Yes	No	No	86	Yes	Literature; iNaturalist; BIEN; GBIF Morocco; WCVP; BIEN-native; GRIIS ; Added: L√©ger, J.-F., Chambouleyron, M., Herment, P.-C., Verloove, F., Chatelain, C., Mombrial, F., Andrieu, F., Homrani Bakali, A., & Tanji, A. (2025). Contribution √† la connaissance de la flore du Maroc, notamment de plantes exog√®nes naturalis√©es. Carnets botaniques, 266. https://doi.org/10.34971/A41W-AC40	FALSE
Morus alba	Moraceae	Yes	No	Yes	42	No	Literature; BIEN; GBIF Morocco; WCVP; BIEN-native; GRIIS; GISD; GRIIS, GISD ; Added: Buanani, R., et al. "INVENTORY OF ORNAMENTAL PLANTS AT THE CAMPUS OF IBN TOFAIL UNIVERSITY, KENITRA (MOROCCO)." Plant Archives 20.2 (2020): 1108-1113.	FALSE
Morus nigra	Moraceae	Yes	No	No	26	No	BIEN; GBIF Morocco; WCVP; BIEN-native; GRIIS	FALSE
Myoporum insulare	Scrophulariaceae	Yes	No	No	4	No	El Jammai list; WCVP; GRIIS	FALSE
Myoporum laetum	Scrophulariaceae	Yes	No	No	6	No	El Jammai list; iNaturalist; BIEN; GBIF Morocco; WCVP; BIEN-native; GRIIS	FALSE
Myoporum tenuifolium	Scrophulariaceae	Yes	No	No	4	No	El Jammai list; BIEN; GBIF Morocco; BIEN-native; GRIIS	FALSE
Nassella tenuissima	Poaceae	Yes	No	Yes	3	No	iNaturalist; GRIIS; GISD; GRIIS, GISD	FALSE
Nicotiana rustica	Solanaceae	Yes	No	No	19	No	El Jammai list; GBIF Morocco; WCVP; GRIIS	FALSE
Oenothera biennis	Onagraceae	Yes	No	No	44	No	El Jammai list; GBIF Morocco; WCVP; GRIIS	FALSE
Oenothera indecora	Onagraceae	Yes	No	No	11	No	El Jammai list; GBIF Morocco; WCVP; GRIIS	FALSE
Oenothera stricta	Onagraceae	Yes	No	No	14	No	El Jammai list; WCVP; GRIIS	FALSE
Opuntia elatior	Cactaceae	Yes	No	No	3	No	El Jammai list; GBIF Morocco; WCVP; GRIIS	FALSE
Opuntia engelmannii	Cactaceae	Yes	No	No	8	No	iNaturalist; GBIF Morocco; GRIIS	FALSE
Opuntia ficus-indica	Cactaceae	Yes	No	Yes	56	Yes	El Jammai list; iNaturalist; BIEN; GBIF Morocco; WCVP; BIEN-native; GRIIS; GISD; GRIIS, GISD	FALSE
Opuntia maxima	Cactaceae	Yes	No	No	12	No	BIEN; GBIF Morocco; WCVP; BIEN-native; GRIIS	FALSE
Opuntia microdasys	Cactaceae	Yes	No	No	9	No	iNaturalist; GBIF Morocco; GRIIS	FALSE
Opuntia robusta	Cactaceae	Yes	No	No	4	No	iNaturalist; GBIF Morocco; GRIIS	FALSE
Opuntia stricta	Cactaceae	Yes	No	Yes	36	No	El Jammai list; iNaturalist; BIEN; GBIF Morocco; WCVP; BIEN-native; GRIIS; GISD; GRIIS, GISD	FALSE
Origanum majorana	Lamiaceae	Yes	No	No	7	No	BIEN; GBIF Morocco; WCVP; BIEN-native; GRIIS	FALSE
Osteospermum ecklonis	Compositae	Yes	No	No	2	No	Literature; GRIIS ; Added: Buanani, R., et al. "INVENTORY OF ORNAMENTAL PLANTS AT THE CAMPUS OF IBN TOFAIL UNIVERSITY, KENITRA (MOROCCO)." Plant Archives 20.2 (2020): 1108-1113.	FALSE
Oxalis articulata	Oxalidaceae	Yes	No	No	16	No	iNaturalist; GBIF Morocco; GRIIS	FALSE
Oxalis corniculata	Oxalidaceae	Yes	No	Yes	83	Yes	El Jammai list; iNaturalist; BIEN; GBIF Morocco; WCVP; BIEN-native; GRIIS; GISD; GRIIS, GISD	FALSE
Oxalis debilis	Oxalidaceae	Yes	No	No	30	No	El Jammai list; iNaturalist; GBIF Morocco; WCVP; GRIIS	FALSE
Oxalis floribunda	Oxalidaceae	Yes	No	No	1	No	El Jammai list; GRIIS	FALSE
Oxalis hirta	Oxalidaceae	Yes	No	No	1	No	El Jammai list; GRIIS	FALSE
Oxalis latifolia	Oxalidaceae	Yes	No	Yes	37	No	iNaturalist; GRIIS; GISD; GRIIS, GISD	FALSE
Oxalis purpurea	Oxalidaceae	Yes	No	No	12	No	El Jammai list; GBIF Morocco; WCVP; GRIIS	FALSE
Paraserianthes lophantha	Leguminosae	Yes	No	No	13	No	iNaturalist; WCVP; GRIIS	FALSE
Parkinsonia aculeata	Leguminosae	Yes	No	No	66	Yes	iNaturalist; BIEN; GBIF Morocco; WCVP; BIEN-native; GRIIS	FALSE
Pelargonium roseum	Geraniaceae	Yes	No	No	1	No	Literature; GRIIS ; Added: Buanani, R., et al. "INVENTORY OF ORNAMENTAL PLANTS AT THE CAMPUS OF IBN TOFAIL UNIVERSITY, KENITRA (MOROCCO)." Plant Archives 20.2 (2020): 1108-1113.	FALSE
Petunia axillaris	Solanaceae	Yes	No	No	5	No	Literature; GRIIS ; Added: Buanani, R., et al. "INVENTORY OF ORNAMENTAL PLANTS AT THE CAMPUS OF IBN TOFAIL UNIVERSITY, KENITRA (MOROCCO)." Plant Archives 20.2 (2020): 1108-1113.	FALSE
Petunia integrifolia	Solanaceae	Yes	No	No	5	No	Literature; GRIIS ; Added: Buanani, R., et al. "INVENTORY OF ORNAMENTAL PLANTS AT THE CAMPUS OF IBN TOFAIL UNIVERSITY, KENITRA (MOROCCO)." Plant Archives 20.2 (2020): 1108-1113.	FALSE
Phoenix canariensis	Arecaceae	Yes	No	Yes	27	No	El Jammai list; iNaturalist; GBIF Morocco; GRIIS; GISD; GRIIS, GISD	FALSE
Phoenix dactylifera	Arecaceae	Yes	No	No	33	No	Literature; BIEN; GBIF Morocco; WCVP; BIEN-native; GRIIS ; Added: Buanani, R., et al. "INVENTORY OF ORNAMENTAL PLANTS AT THE CAMPUS OF IBN TOFAIL UNIVERSITY, KENITRA (MOROCCO)." Plant Archives 20.2 (2020): 1108-1113.	FALSE
Phoenix reclinata	Arecaceae	Yes	No	No	8	No	iNaturalist; GBIF Morocco; GRIIS	FALSE
Phyllanthus tenellus	Phyllanthaceae	Yes	No	No	24	No	Literature; GBIF Morocco; GRIIS ; Added: Khamar, H., Benkhnigue, O., Douira, A., Zidane, L., & Touhami, A. O. (2022). Phyllanthus tenellus Roxb.(Phyllanthaceae), a newly naturalising species in Morocco. Check List, 18(2).	FALSE
Physalis ixocarpa	Solanaceae	Yes	No	No	11	No	Literature; GRIIS ; Added: L√©ger, J.-F., Chambouleyron, M., Herment, P.-C., Verloove, F., Chatelain, C., Mombrial, F., Andrieu, F., Homrani Bakali, A., & Tanji, A. (2025). Contribution √† la connaissance de la flore du Maroc, notamment de plantes exog√®nes naturalis√©es. Carnets botaniques, 266. https://doi.org/10.34971/A41W-AC45	FALSE
Physalis philadelphica	Solanaceae	Yes	No	No	18	No	BIEN; GBIF Morocco; WCVP; BIEN-native; GRIIS	FALSE
Physalis pubescens	Solanaceae	Yes	No	No	12	No	BIEN; GBIF Morocco; WCVP; BIEN-native; GRIIS	FALSE
Phytolacca americana	Phytolaccaceae	Yes	No	No	37	No	BIEN; GBIF Morocco; WCVP; BIEN-native; GRIIS	FALSE
Phytolacca dioica	Phytolaccaceae	Yes	No	No	8	No	El Jammai list; iNaturalist; GBIF Morocco; WCVP; GRIIS	FALSE
Pimpinella anisum	Apiaceae	Yes	No	No	7	No	BIEN; GBIF Morocco; WCVP; BIEN-native; GRIIS	FALSE
Pinus canariensis	Pinaceae	Yes	No	No	4	No	iNaturalist; WCVP; GRIIS	FALSE
Pinus pinea	Pinaceae	Yes	No	No	12	No	BIEN; GBIF Morocco; WCVP; BIEN-native; GRIIS	FALSE
Pistacia vera	Anacardiaceae	Yes	No	No	4	No	BIEN; GBIF Morocco; WCVP; BIEN-native; GRIIS	FALSE
Pistia stratiotes	Araceae	Yes	No	Yes	88	Yes	El Jammai list; iNaturalist; GBIF Morocco; GRIIS; GISD; GRIIS, GISD	FALSE
Pittosporum tobira	Pittosporaceae	Yes	No	No	12	No	El Jammai list; iNaturalist; BIEN; GBIF Morocco; BIEN-native; GRIIS	FALSE
Pittosporum undulatum	Pittosporaceae	Yes	No	Yes	20	No	BIEN; GBIF Morocco; WCVP; BIEN-native; GRIIS; GISD; GRIIS, GISD	FALSE
Platanus hispanica	NA	Yes	No	No	7	No	iNaturalist; GBIF Morocco; GRIIS	FALSE
Platycladus orientalis	Cupressaceae	Yes	No	No	13	No	Literature; GRIIS ; Added: Buanani, R., et al. "INVENTORY OF ORNAMENTAL PLANTS AT THE CAMPUS OF IBN TOFAIL UNIVERSITY, KENITRA (MOROCCO)." Plant Archives 20.2 (2020): 1108-1113.	FALSE
Plectranthus neochilus	Lamiaceae	Yes	No	No	1	No	Literature; GRIIS ; Added: Buanani, R., et al. "INVENTORY OF ORNAMENTAL PLANTS AT THE CAMPUS OF IBN TOFAIL UNIVERSITY, KENITRA (MOROCCO)." Plant Archives 20.2 (2020): 1108-1113.	FALSE
Plumbago auriculata	Plumbaginaceae	Yes	No	No	21	No	Literature; iNaturalist; BIEN; GBIF Morocco; BIEN-native; GRIIS ; Added: Buanani, R., et al. "INVENTORY OF ORNAMENTAL PLANTS AT THE CAMPUS OF IBN TOFAIL UNIVERSITY, KENITRA (MOROCCO)." Plant Archives 20.2 (2020): 1108-1113.	FALSE
Poa pratensis	Poaceae	Yes	No	Yes	16	No	BIEN; GBIF Morocco; WCVP; BIEN-native; GRIIS; GISD; GRIIS, GISD	FALSE
Portulacaria afra	Didiereaceae	Yes	No	No	1	No	BIEN; GBIF Morocco; BIEN-native; GRIIS	FALSE
Prosopis juliflora	Leguminosae	Yes	No	Yes	69	Yes	El Jammai list; BIEN; GBIF Morocco; BIEN-native; GRIIS; GISD; GRIIS, GISD	FALSE
Prunus armeniaca	Rosaceae	Yes	No	No	14	No	BIEN; GBIF Morocco; WCVP; BIEN-native; GRIIS	FALSE
Pyrostegia venusta	Bignoniaceae	Yes	No	No	8	No	iNaturalist; GBIF Morocco; GRIIS	FALSE
Reseda odorata	Resedaceae	Yes	No	No	8	No	BIEN; GBIF Morocco; WCVP; BIEN-native; GRIIS	FALSE
Rubia tinctorum	Rubiaceae	Yes	No	No	16	No	El Jammai list; BIEN; GBIF Morocco; WCVP; BIEN-native; GRIIS	FALSE
Rumex obtusifolius	Polygonaceae	Yes	No	Yes	23	No	BIEN; GBIF Morocco; WCVP; BIEN-native; GRIIS; GISD; GRIIS, GISD	FALSE
Ruta graveolens	Rutaceae	Yes	No	No	11	No	El Jammai list; BIEN; GBIF Morocco; BIEN-native; GRIIS	FALSE
Salix babylonica	Salicaceae	Yes	No	Yes	23	No	Literature; GBIF Morocco; GRIIS; GISD; GRIIS, GISD ; Added: Khabbach, Abdelmajid, Mohamed Libiad, and Abdeslam Ennabili. "An updated checklist of the wetland vascular flora from Morocco." Moroccan Journal of Biology 17 (2020): 1-35	FALSE
Salvia fruticosa	Lamiaceae	Yes	No	No	1	No	El Jammai list; iNaturalist; GBIF Morocco; WCVP; GRIIS	FALSE
Salvia officinalis	Lamiaceae	Yes	No	No	7	No	El Jammai list; BIEN; GBIF Morocco; WCVP; BIEN-native; GRIIS	FALSE
Saponaria officinalis	Caryophyllaceae	Yes	No	No	17	No	BIEN; GBIF Morocco; WCVP; BIEN-native; GRIIS	FALSE
Schefflera actinophylla	Araliaceae	Yes	No	Yes	26	No	Literature; GRIIS; GISD; GRIIS, GISD ; Added: Buanani, R., et al. "INVENTORY OF ORNAMENTAL PLANTS AT THE CAMPUS OF IBN TOFAIL UNIVERSITY, KENITRA (MOROCCO)." Plant Archives 20.2 (2020): 1108-1113.	FALSE
Schefflera arboricola	Araliaceae	Yes	No	No	10	No	Literature; GRIIS ; Added: Buanani, R., et al. "INVENTORY OF ORNAMENTAL PLANTS AT THE CAMPUS OF IBN TOFAIL UNIVERSITY, KENITRA (MOROCCO)." Plant Archives 20.2 (2020): 1108-1113.	FALSE
Schinus molle	Anacardiaceae	Yes	No	No	26	No	El Jammai list; iNaturalist; BIEN; GBIF Morocco; WCVP; BIEN-native; GRIIS	FALSE
Schinus terebinthifolia	Anacardiaceae	Yes	No	No	36	No	iNaturalist; GBIF Morocco; WCVP; GRIIS	FALSE
Senecio angulatus	Compositae	Yes	No	Yes	13	No	iNaturalist; GBIF Morocco; GRIIS; GISD; GRIIS, GISD	FALSE
Senecio santiagoensis	Compositae	Yes	No	No	1	No	BIEN; GBIF Morocco; BIEN-native; GRIIS	FALSE
Senna bicapsularis	Leguminosae	Yes	No	No	18	No	El Jammai list; GBIF Morocco; WCVP; GRIIS	FALSE
Senna multiglandulosa	Leguminosae	Yes	No	No	3	No	El Jammai list; WCVP; GRIIS	FALSE
Setaria palmifolia	Poaceae	Yes	No	No	17	No	Literature; GRIIS ; Added: L√©ger, J.-F., Chambouleyron, M., Herment, P.-C., Verloove, F., Chatelain, C., Mombrial, F., Andrieu, F., Homrani Bakali, A., & Tanji, A. (2025). Contribution √† la connaissance de la flore du Maroc, notamment de plantes exog√®nes naturalis√©es. Carnets botaniques, 266. https://doi.org/10.34971/A41W-AC46	FALSE
Solandra maxima	Solanaceae	Yes	No	No	8	No	iNaturalist; GBIF Morocco; GRIIS	FALSE
Solanum abutiloides	Solanaceae	Yes	No	No	3	No	Literature; GRIIS ; Added: Khamar, Hamid, Youssef Dallahi, and Abdelmonaim Homrani Bakali. "New records of three alien Solanumspecies in Morocco." Check List 20.2 (2024): 544.	FALSE
Solanum americanum	Solanaceae	Yes	No	No	41	No	El Jammai list; GBIF Morocco; GRIIS	FALSE
Solanum angustifolium	Solanaceae	Yes	No	No	15	No	El Jammai list; GRIIS	FALSE
Solanum bonariense	Solanaceae	Yes	No	No	4	No	Literature; iNaturalist; GBIF Morocco; GRIIS ; Added: Khamar, Hamid, Youssef Dallahi, and Abdelmonaim Homrani Bakali. "New records of three alien Solanumspecies in Morocco." Check List 20.2 (2024): 544.	FALSE
Solanum laciniatum	Solanaceae	Yes	No	No	5	No	BIEN; GBIF Morocco; WCVP; BIEN-native; GRIIS	FALSE
Solanum laxum	Solanaceae	Yes	No	No	7	No	iNaturalist; GRIIS	FALSE
Solanum linnaeanum	Solanaceae	Yes	No	No	9	No	El Jammai list; iNaturalist; BIEN; GBIF Morocco; WCVP; BIEN-native; GRIIS	FALSE
Solanum marginatum	Solanaceae	Yes	No	No	9	No	El Jammai list; WCVP; GRIIS	FALSE
Solanum melongena	Solanaceae	Yes	No	No	26	No	iNaturalist; BIEN; GBIF Morocco; BIEN-native; GRIIS	FALSE
Solanum rostratum	Solanaceae	Yes	No	No	16	No	iNaturalist; GBIF Morocco; WCVP; GRIIS	FALSE
Solanum sisymbriifolium	Solanaceae	Yes	No	Yes	23	No	iNaturalist; GBIF Morocco; WCVP; GRIIS; GISD; GRIIS, GISD	FALSE
Solanum triflorum	Solanaceae	Yes	No	No	12	No	BIEN; GBIF Morocco; WCVP; BIEN-native; GRIIS	FALSE
Spinacia oleracea	Amaranthaceae	Yes	No	No	16	No	BIEN; GBIF Morocco; WCVP; BIEN-native; GRIIS	FALSE
Syagrus romanzoffiana	Arecaceae	Yes	No	No	5	No	Literature; BIEN; GBIF Morocco; BIEN-native; GRIIS ; Added: Buanani, R., et al. "INVENTORY OF ORNAMENTAL PLANTS AT THE CAMPUS OF IBN TOFAIL UNIVERSITY, KENITRA (MOROCCO)." Plant Archives 20.2 (2020): 1108-1113.	FALSE
Tagetes erecta	Compositae	Yes	No	No	39	No	Literature; GBIF Morocco; WCVP; GRIIS ; Added: Buanani, R., et al. "INVENTORY OF ORNAMENTAL PLANTS AT THE CAMPUS OF IBN TOFAIL UNIVERSITY, KENITRA (MOROCCO)." Plant Archives 20.2 (2020): 1108-1113.	FALSE
Tecoma capensis	Bignoniaceae	Yes	No	Yes	18	No	Literature; BIEN; BIEN-native; GRIIS; GISD; GRIIS, GISD ; Added: Buanani, R., et al. "INVENTORY OF ORNAMENTAL PLANTS AT THE CAMPUS OF IBN TOFAIL UNIVERSITY, KENITRA (MOROCCO)." Plant Archives 20.2 (2020): 1108-1113.	FALSE
Tectona grandis	Lamiaceae	Yes	No	No	25	No	iNaturalist; GBIF Morocco; GRIIS	FALSE
Thlaspi arvense	Brassicaceae	Yes	No	No	23	No	El Jammai list; GBIF Morocco; WCVP; GRIIS	FALSE
Tithonia diversifolia	Asteraceae	Yes	No	Yes	69	Yes	Literature; GRIIS; GISD; GRIIS, GISD ; Added: L√©ger, J.-F., Chambouleyron, M., Herment, P.-C., Verloove, F., Chatelain, C., Mombrial, F., Andrieu, F., Homrani Bakali, A., & Tanji, A. (2025). Contribution √† la connaissance de la flore du Maroc, notamment de plantes exog√®nes naturalis√©es. Carnets botaniques, 266. https://doi.org/10.34971/A41W-AC47	FALSE
Trachelospermum jasminoides	Apocynaceae	Yes	No	No	1	No	iNaturalist; GRIIS	FALSE
Tradescantia pallida	Commelinaceae	Yes	No	No	24	No	iNaturalist; GBIF Morocco; GRIIS	FALSE
Triglochin striata	Juncaginaceae	Yes	No	No	1	No	El Jammai list; GBIF Morocco; WCVP; GRIIS	FALSE
Tropaeolum majus	Tropaeolaceae	Yes	No	No	44	No	El Jammai list; iNaturalist; GBIF Morocco; WCVP; GRIIS	FALSE
Vachellia karroo	Leguminosae	Yes	No	No	7	No	El Jammai list; iNaturalist; BIEN; GBIF Morocco; WCVP; BIEN-native; GRIIS	FALSE
Veronica persica	Plantaginaceae	Yes	No	No	40	No	El Jammai list; BIEN; GBIF Morocco; WCVP; BIEN-native; GRIIS	FALSE
Vicia ervilia	Leguminosae	Yes	No	No	16	No	El Jammai list; BIEN; GBIF Morocco; WCVP; BIEN-native; GRIIS	FALSE
Vicia faba	Leguminosae	Yes	No	No	22	No	El Jammai list; BIEN; GBIF Morocco; WCVP; BIEN-native; GRIIS	FALSE
Waltheria indica	Malvaceae	Yes	No	No	26	No	iNaturalist; GRIIS	FALSE
Washingtonia filifera	Arecaceae	Yes	No	No	10	No	iNaturalist; GRIIS	FALSE
Washingtonia robusta	Arecaceae	Yes	No	No	14	No	Literature; GBIF Morocco; GRIIS ; Added: Buanani, R., et al. "INVENTORY OF ORNAMENTAL PLANTS AT THE CAMPUS OF IBN TOFAIL UNIVERSITY, KENITRA (MOROCCO)." Plant Archives 20.2 (2020): 1108-1113.	FALSE
Yucca aloifolia	Asparagaceae	Yes	No	No	12	No	Literature; GRIIS ; Added: Buanani, R., et al. "INVENTORY OF ORNAMENTAL PLANTS AT THE CAMPUS OF IBN TOFAIL UNIVERSITY, KENITRA (MOROCCO)." Plant Archives 20.2 (2020): 1108-1113.	FALSE
Yucca gigantea	Asparagaceae	Yes	No	No	1	No	Literature; GRIIS ; Added: Buanani, R., et al. "INVENTORY OF ORNAMENTAL PLANTS AT THE CAMPUS OF IBN TOFAIL UNIVERSITY, KENITRA (MOROCCO)." Plant Archives 20.2 (2020): 1108-1113.	FALSE
Yucca gloriosa	Asparagaceae	Yes	No	No	13	No	iNaturalist; GRIIS	FALSE
Ziziphus jujuba	Rhamnaceae	Yes	No	No	12	No	iNaturalist; BIEN; GBIF Morocco; WCVP; BIEN-native; GRIIS	FALSE
